# Supplementary material for: A probabilistic approach to visualize the effect of missing data on PCA in ancient human genomics
Source: BMC Genomics. 2025 May 27;26:537. doi: 10.1186/s12864-025-11728-1 (PMC12108005; doi:10.1186/s12864-025-11728-1)
Supplement: Supplementary file 1 — Supplementary Material l. [file 12864_2025_11728_MOESM1_ESM.xlsx]

## Sheet: Sheet1
Genetic ID	Master ID	Skeletal code	Skeletal element	Year data from this individual was first published [for a present-day individuals we give the data of the data reported here; missing GreenScience 2010 (Vi33.15, Vi33.26), Olalde2018 (I2657), RasmussenNature2010 (Australian)]	Publication	Method for Determining Date; unless otherwise specified, calibrations use 95.4% intervals from OxCal v4.4.2 Bronk Ramsey (2009); r5; Atmospheric data from Reimer et al (2020)	Date mean in BP in years before 1950 CE [OxCal mu for a direct radiocarbon date, and average of range for a contextual date]	Date standard deviation in BP [OxCal sigma for a direct radiocarbon date, and standard deviation of the uniform distribution between the two bounds for a contextual date]	Full Date One of two formats. (Format 1) 95.4% CI calibrated radiocarbon age (Conventional Radiocarbon Age BP, Lab number) e.g. 2624-2350 calBCE (3990¬±40 BP, Ua-35016). (Format 2) Archaeological context range, e.g. 2500-1700 BCE	Age at Death from physical anthropology	Group ID	Locality	Political Entity	Lat.	Long.	Pulldown Strategy	Data source	No. Libraries	1240k coverage (taken from original pulldown where possible)	SNPs hit on autosomal targets (Computed using easystats on 1240k snpset)	SNPs hit on autosomal targets (Computed using easystats on HO snpset)	Molecular Sex	Family ID and position within family	Y haplogroup (manual curation in terminal mutation format)	Y haplogroup (manual curation in ISOGG format)	mtDNA coverage (merged data)	mtDNA haplogroup if >2x or published	mtDNA match to consensus if >2x (merged data)	Damage rate in first nucleotide on sequences overlapping 1240k targets (merged data)	Sex ratio [Y/(Y+X) counts] (merged data)	Library type (minus=no.damage.correction, half=damage.retained.at.last.position, plus=damage.fully.corrected, ds=double.stranded.library.preparation, ss=single.stranded.library.preparation)	Libraries	ASSESSMENT	ASSESSMENT WARNINGS (Xcontam interval is listed if lower bound is >0.005, "QUESTIONABLE" if lower bound is 0.01-0.02, "QUESTIONABLE_CRITICAL" or "FAIL" if lower bound is >0.02) (mtcontam confidence interval is listed if coverage >2 and upper bound is <0.
Adg-185.HO	Adg-185	..	..	2019	JeongNatureEcologyEvolution2019	Modern	0	0	present	..	Adygei.HO	Adyghei Republic, Shovgenovsky district, Mamkheg village	Russia	45	40.22	1240K pulldown padded to 3.2M snpset	HumanOrigins	..	..	..	584492	F	..	n/a (female)	n/a (female)	..	..	..	..	..	..	..	PASS	..
Adg-192.HO	Adg-192	..	..	2019	JeongNatureEcologyEvolution2019	Modern	0	0	present	..	Adygei.HO	Adyghei Republic, Shovgenovsky district, Mamkheg village	Russia	45	40.22	1240K pulldown padded to 3.2M snpset	HumanOrigins	..	..	..	584509	M	..	..	..	..	..	..	..	..	..	..	PASS	..
Adg-194.HO	Adg-194	..	..	2019	JeongNatureEcologyEvolution2019	Modern	0	0	present	..	Adygei.HO	Adyghei Republic, Shovgenovsky district, Mamkheg village	Russia	45	40.22	1240K pulldown padded to 3.2M snpset	HumanOrigins	..	..	..	584799	M	..	..	..	..	..	..	..	..	..	..	PASS	..
Adg-222.HO	Adg-222	..	..	2019	JeongNatureEcologyEvolution2019	Modern	0	0	present	..	Adygei.HO	Adyghei Republic, Shovgenovsky district	Russia	45.01	40.22	1240K pulldown padded to 3.2M snpset	HumanOrigins	..	..	..	584280	M	..	..	..	..	..	..	..	..	..	..	PASS	..
Adg-224.HO	Adg-224	..	..	2019	JeongNatureEcologyEvolution2019	Modern	0	0	present	..	Adygei.HO	Adyghei Republic, Shovgenovsky district	Russia	45.01	40.22	1240K pulldown padded to 3.2M snpset	HumanOrigins	..	..	..	583981	M	..	..	..	..	..	..	..	..	..	..	PASS	..
Adg-226.HO	Adg-226	..	..	2019	JeongNatureEcologyEvolution2019	Modern	0	0	present	..	Adygei.HO	Adyghei Republic, Shovgenovsky district	Russia	45.01	40.22	1240K pulldown padded to 3.2M snpset	HumanOrigins	..	..	..	584741	F	..	n/a (female)	n/a (female)	..	..	..	..	..	..	..	PASS	..
Adg-227.HO	Adg-227	..	..	2019	JeongNatureEcologyEvolution2019	Modern	0	0	present	..	Adygei.HO	Adyghei Republic, Shovgenovsky district, Mamkheg village	Russia	45	40.22	1240K pulldown padded to 3.2M snpset	HumanOrigins	..	..	..	584780	F	..	n/a (female)	n/a (female)	..	..	..	..	..	..	..	PASS	..
Adg-238.HO	Adg-238	..	..	2019	JeongNatureEcologyEvolution2019	Modern	0	0	present	..	Adygei.HO	Adyghei Republic	Russia	45	38.75	1240K pulldown padded to 3.2M snpset	HumanOrigins	..	..	..	584818	M	..	..	..	..	..	..	..	..	..	..	PASS	..
ARK-59.HO	ARK-59	..	..	2019	JeongNatureEcologyEvolution2019	Modern	0	0	present	..	Armenian_Hemsheni.HO	Adyghei Republic, Maykop, p.Proletarsky	Russia	41	39.7	1240K pulldown padded to 3.2M snpset	HumanOrigins	..	..	..	581140	M	..	..	..	..	..	..	..	..	..	..	PASS	..
ARK-72.HO	ARK-72	..	..	2019	JeongNatureEcologyEvolution2019	Modern	0	0	present	..	Armenian_Hemsheni.HO	Adyghei Republic, Maykop, p.Proletarsky	Russia	41	39.7	1240K pulldown padded to 3.2M snpset	HumanOrigins	..	..	..	584235	M	..	..	..	..	..	..	..	..	..	..	PASS	..
ARK-76.HO	ARK-76	..	..	2019	JeongNatureEcologyEvolution2019	Modern	0	0	present	..	Armenian_Hemsheni.HO	Adyghei Republic, Maykop, p.Proletarsky	Russia	41	39.7	1240K pulldown padded to 3.2M snpset	HumanOrigins	..	..	..	584593	M	..	..	..	..	..	..	..	..	..	..	PASS	..
ARK-78.HO	ARK-78	..	..	2019	JeongNatureEcologyEvolution2019	Modern	0	0	present	..	Armenian_Hemsheni.HO	Adyghei Republic, Maykop, p.Proletarsky	Russia	41	39.7	1240K pulldown padded to 3.2M snpset	HumanOrigins	..	..	..	584379	M	..	..	..	..	..	..	..	..	..	..	PASS	..
ARK-82.HO	ARK-82	..	..	2019	JeongNatureEcologyEvolution2019	Modern	0	0	present	..	Armenian_Hemsheni.HO	Adyghei Republic, Maykop, p.Proletarsky	Russia	41	39.7	1240K pulldown padded to 3.2M snpset	HumanOrigins	..	..	..	584318	M	..	..	..	..	..	..	..	..	..	..	PASS	..
ARK-84.HO	ARK-84	..	..	2019	JeongNatureEcologyEvolution2019	Modern	0	0	present	..	Armenian_Hemsheni.HO	Adyghei Republic, Maykop, p.Proletarsky	Russia	41	39.7	1240K pulldown padded to 3.2M snpset	HumanOrigins	..	..	..	584490	M	..	..	..	..	..	..	..	..	..	..	PASS	..
ARK-88.HO	ARK-88	..	..	2019	JeongNatureEcologyEvolution2019	Modern	0	0	present	..	Armenian_Hemsheni.HO	Adyghei Republic, Maykop, p.Proletarsky	Russia	41	39.7	1240K pulldown padded to 3.2M snpset	HumanOrigins	..	..	..	583785	M	..	..	..	..	..	..	..	..	..	..	PASS	..
ARK-89.HO	ARK-89	..	..	2019	JeongNatureEcologyEvolution2019	Modern	0	0	present	..	Armenian_Hemsheni.HO	Adyghei Republic, Maykop, p.Proletarsky	Russia	41	39.7	1240K pulldown padded to 3.2M snpset	HumanOrigins	..	..	..	584937	M	..	..	..	..	..	..	..	..	..	..	PASS	..
GEO-002.HO	GEO-002	..	..	2019	JeongNatureEcologyEvolution2019	Modern	0	0	present	..	Georgian.HO	Turkey	Turkey	40.93	40.84	1240K pulldown padded to 3.2M snpset	HumanOrigins	..	..	..	568567	M	..	..	..	..	..	..	..	..	..	..	PASS	..
GEO-005.HO	GEO-005	..	..	2019	JeongNatureEcologyEvolution2019	Modern	0	0	present	..	Georgian.HO	Turkey	Turkey	40.93	40.84	1240K pulldown padded to 3.2M snpset	HumanOrigins	..	..	..	584821	M	..	..	..	..	..	..	..	..	..	..	PASS	..
GEO-010.HO	GEO-010	..	..	2019	JeongNatureEcologyEvolution2019	Modern	0	0	present	..	Georgian.HO	Turkey	Turkey	40.93	40.84	1240K pulldown padded to 3.2M snpset	HumanOrigins	..	..	..	584592	M	..	..	..	..	..	..	..	..	..	..	PASS	..
GEO-015.HO	GEO-015	..	..	2019	JeongNatureEcologyEvolution2019	Modern	0	0	present	..	Georgian.HO	Georgia	Georgia	42.25	42.7	1240K pulldown padded to 3.2M snpset	HumanOrigins	..	..	..	584927	M	..	..	..	..	..	..	..	..	..	..	PASS	..
GEO-020.HO	GEO-020	..	..	2019	JeongNatureEcologyEvolution2019	Modern	0	0	present	..	Georgian.HO	Georgia	Georgia	42.25	42.7	1240K pulldown padded to 3.2M snpset	HumanOrigins	..	..	..	584175	M	..	..	..	..	..	..	..	..	..	..	PASS	..
GEO-028.HO	GEO-028	..	..	2019	JeongNatureEcologyEvolution2019	Modern	0	0	present	..	Georgian.HO	Georgia	Georgia	42.25	42.7	1240K pulldown padded to 3.2M snpset	HumanOrigins	..	..	..	584398	M	..	..	..	..	..	..	..	..	..	..	PASS	..
GEO-031.HO	GEO-031	..	..	2019	JeongNatureEcologyEvolution2019	Modern	0	0	present	..	Georgian.HO	Georgia	Georgia	42.25	42.7	1240K pulldown padded to 3.2M snpset	HumanOrigins	..	..	..	584967	M	..	..	..	..	..	..	..	..	..	..	PASS	..
GEO-032.HO	GEO-032	..	..	2019	JeongNatureEcologyEvolution2019	Modern	0	0	present	..	Georgian.HO	Georgia	Georgia	42.25	42.7	1240K pulldown padded to 3.2M snpset	HumanOrigins	..	..	..	584223	M	..	..	..	..	..	..	..	..	..	..	PASS	..
GEO-039.HO	GEO-039	..	..	2019	JeongNatureEcologyEvolution2019	Modern	0	0	present	..	Georgian.HO	Georgia	Georgia	42.25	42.7	1240K pulldown padded to 3.2M snpset	HumanOrigins	..	..	..	584115	M	..	..	..	..	..	..	..	..	..	..	PASS	..
GEO-051.HO	GEO-051	..	..	2019	JeongNatureEcologyEvolution2019	Modern	0	0	present	..	Georgian.HO	Turkey	Turkey	40.93	40.84	1240K pulldown padded to 3.2M snpset	HumanOrigins	..	..	..	583004	M	..	..	..	..	..	..	..	..	..	..	PASS	..
GEO-061.HO	GEO-061	..	..	2019	JeongNatureEcologyEvolution2019	Modern	0	0	present	..	Georgian.HO	Turkey	Turkey	40.93	40.84	1240K pulldown padded to 3.2M snpset	HumanOrigins	..	..	..	582872	M	..	..	..	..	..	..	..	..	..	..	PASS	..
GEO-082.HO	GEO-082	..	..	2019	JeongNatureEcologyEvolution2019	Modern	0	0	present	..	Georgian.HO	Turkey	Turkey	40.93	40.84	1240K pulldown padded to 3.2M snpset	HumanOrigins	..	..	..	582802	M	..	..	..	..	..	..	..	..	..	..	PASS	..
GEO001.HO	GEO001	..	..	2019	JeongNatureEcologyEvolution2019	Modern	0	0	present	..	Georgian.HO	Turkey	Turkey	40.93	40.84	1240K pulldown padded to 3.2M snpset	HumanOrigins	..	..	..	579240	M	..	..	..	..	..	..	..	..	..	..	PASS	..
lpgh-303.HO	lpgh-303	..	..	2019	JeongNatureEcologyEvolution2019	Modern	0	0	present	..	Adygei.HO	Adyghei Republic, Takhtamukayski district	Russia	44.89	39.24	1240K pulldown padded to 3.2M snpset	HumanOrigins	..	..	..	584820	M	..	..	..	..	..	..	..	..	..	..	PASS	..
MOE-001.HO	MOE-001	..	..	2019	JeongNatureEcologyEvolution2019	Modern	0	0	present	..	Mordovian.HO	Mordovia Republic, Lukoyanovsky, Ardatovsky, Chamzinsky, Ichkalovsky districts	Russia	55.08	44.16	1240K pulldown padded to 3.2M snpset	HumanOrigins	..	..	..	584552	M	..	..	..	..	..	..	..	..	..	..	PASS	..
MOE-002.HO	MOE-002	..	..	2019	JeongNatureEcologyEvolution2019	Modern	0	0	present	..	Mordovian.HO	Mordovia Republic, Lukoyanovsky, Ardatovsky, Chamzinsky, Ichkalovsky districts	Russia	55.08	44.16	1240K pulldown padded to 3.2M snpset	HumanOrigins	..	..	..	584581	M	..	..	..	..	..	..	..	..	..	..	PASS	..
MOE-010.HO	MOE-010	..	..	2019	JeongNatureEcologyEvolution2019	Modern	0	0	present	..	Mordovian.HO	Mordovia Republic, Lukoyanovsky, Ardatovsky, Chamzinsky, Ichkalovsky districts	Russia	55.08	44.16	1240K pulldown padded to 3.2M snpset	HumanOrigins	..	..	..	585058	M	..	..	..	..	..	..	..	..	..	..	PASS	..
MOE-014.HO	MOE-014	..	..	2019	JeongNatureEcologyEvolution2019	Modern	0	0	present	..	Mordovian.HO	Mordovia Republic, Torbeevsky, Insarsky, Krasnoslobodsky districts	Russia	54.08	43.13	1240K pulldown padded to 3.2M snpset	HumanOrigins	..	..	..	584880	M	..	..	..	..	..	..	..	..	..	..	PASS	..
MOE-015.HO	MOE-015	..	..	2019	JeongNatureEcologyEvolution2019	Modern	0	0	present	..	Mordovian.HO	Mordovia Republic, Torbeevsky, Insarsky, Krasnoslobodsky districts	Russia	54.08	43.13	1240K pulldown padded to 3.2M snpset	HumanOrigins	..	..	..	584739	M	..	..	..	..	..	..	..	..	..	..	PASS	..
MOE-020.HO	MOE-020	..	..	2019	JeongNatureEcologyEvolution2019	Modern	0	0	present	..	Mordovian.HO	Mordovia Republic, Torbeevsky, Insarsky, Krasnoslobodsky districts	Russia	54.08	43.13	1240K pulldown padded to 3.2M snpset	HumanOrigins	..	..	..	584986	M	..	..	..	..	..	..	..	..	..	..	PASS	..
MOE-025.HO	MOE-025	..	..	2019	JeongNatureEcologyEvolution2019	Modern	0	0	present	..	Mordovian.HO	Mordovia Republic, Torbeevsky, Insarsky, Krasnoslobodsky districts	Russia	54.08	43.13	1240K pulldown padded to 3.2M snpset	HumanOrigins	..	..	..	585098	M	..	..	..	..	..	..	..	..	..	..	PASS	..
MOE-036.HO	MOE-036	..	..	2019	JeongNatureEcologyEvolution2019	Modern	0	0	present	..	Mordovian.HO	Mordovia Republic, Lukoyanovsky, Ardatovsky, Chamzinsky, Ichkalovsky districts	Russia	55.08	44.16	1240K pulldown padded to 3.2M snpset	HumanOrigins	..	..	..	585072	M	..	..	..	..	..	..	..	..	..	..	PASS	..
MOE-043.HO	MOE-043	..	..	2019	JeongNatureEcologyEvolution2019	Modern	0	0	present	..	Mordovian.HO	Mordovia Republic, Lukoyanovsky, Ardatovsky, Chamzinsky, Ichkalovsky districts	Russia	55.08	44.16	1240K pulldown padded to 3.2M snpset	HumanOrigins	..	..	..	585087	M	..	..	..	..	..	..	..	..	..	..	PASS	..
MOE-045.HO	MOE-045	..	..	2019	JeongNatureEcologyEvolution2019	Modern	0	0	present	..	Mordovian.HO	Mordovia Republic, Lukoyanovsky, Ardatovsky, Chamzinsky, Ichkalovsky districts	Russia	55.08	44.16	1240K pulldown padded to 3.2M snpset	HumanOrigins	..	..	..	584537	M	..	..	..	..	..	..	..	..	..	..	PASS	..
MOE-433.HO	MOE-433	..	..	2019	JeongNatureEcologyEvolution2019	Modern	0	0	present	..	Mordovian.HO	Mordovia Republic, Torbeevsky, Insarsky, Krasnoslobodsky districts	Russia	54.08	43.13	1240K pulldown padded to 3.2M snpset	HumanOrigins	..	..	..	579129	M	..	..	..	..	..	..	..	..	..	..	PASS	..
MOE-445.HO	MOE-445	..	..	2019	JeongNatureEcologyEvolution2019	Modern	0	0	present	..	Mordovian.HO	Mordovia Republic, Torbeevsky, Insarsky, Krasnoslobodsky districts	Russia	54.08	43.13	1240K pulldown padded to 3.2M snpset	HumanOrigins	..	..	..	584808	M	..	..	..	..	..	..	..	..	..	..	PASS	..
MOE-450.HO	MOE-450	..	..	2019	JeongNatureEcologyEvolution2019	Modern	0	0	present	..	Mordovian.HO	Mordovia Republic, Torbeevsky, Insarsky, Krasnoslobodsky districts	Russia	54.08	43.13	1240K pulldown padded to 3.2M snpset	HumanOrigins	..	..	..	585069	M	..	..	..	..	..	..	..	..	..	..	PASS	..
MOE-451.HO	MOE-451	..	..	2019	JeongNatureEcologyEvolution2019	Modern	0	0	present	..	Mordovian.HO	Mordovia Republic, Torbeevsky, Insarsky, Krasnoslobodsky districts	Russia	54.08	43.13	1240K pulldown padded to 3.2M snpset	HumanOrigins	..	..	..	584958	M	..	..	..	..	..	..	..	..	..	..	PASS	..
MOE-452.HO	MOE-452	..	..	2019	JeongNatureEcologyEvolution2019	Modern	0	0	present	..	Mordovian.HO	Mordovia Republic, Torbeevsky, Insarsky, Krasnoslobodsky districts	Russia	54.08	43.13	1240K pulldown padded to 3.2M snpset	HumanOrigins	..	..	..	585079	M	..	..	..	..	..	..	..	..	..	..	PASS	..
MOE-455.HO	MOE-455	..	..	2019	JeongNatureEcologyEvolution2019	Modern	0	0	present	..	Mordovian.HO	Mordovia Republic, Torbeevsky, Insarsky, Krasnoslobodsky districts	Russia	54.08	43.13	1240K pulldown padded to 3.2M snpset	HumanOrigins	..	..	..	585101	M	..	..	..	..	..	..	..	..	..	..	PASS	..
MOE-475.HO	MOE-475	..	..	2019	JeongNatureEcologyEvolution2019	Modern	0	0	present	..	Mordovian.HO	Mordovia Republic, Lukoyanovsky, Ardatovsky, Chamzinsky, Ichkalovsky districts	Russia	55.08	44.16	1240K pulldown padded to 3.2M snpset	HumanOrigins	..	..	..	584673	M	..	..	..	..	..	..	..	..	..	..	PASS	..
MOE-485.HO	MOE-485	..	..	2019	JeongNatureEcologyEvolution2019	Modern	0	0	present	..	Mordovian.HO	Mordovia Republic, Lukoyanovsky, Ardatovsky, Chamzinsky, Ichkalovsky districts	Russia	55.08	44.16	1240K pulldown padded to 3.2M snpset	HumanOrigins	..	..	..	584995	M	..	..	..	..	..	..	..	..	..	..	PASS	..
MOE-491.HO	MOE-491	..	..	2019	JeongNatureEcologyEvolution2019	Modern	0	0	present	..	Mordovian.HO	Mordovia Republic, Lukoyanovsky, Ardatovsky, Chamzinsky, Ichkalovsky districts	Russia	55.08	44.16	1240K pulldown padded to 3.2M snpset	HumanOrigins	..	..	..	584697	M	..	..	..	..	..	..	..	..	..	..	PASS	..
MOE-492.HO	MOE-492	..	..	2019	JeongNatureEcologyEvolution2019	Modern	0	0	present	..	Mordovian.HO	Mordovia Republic, Lukoyanovsky, Ardatovsky, Chamzinsky, Ichkalovsky districts	Russia	55.08	44.16	1240K pulldown padded to 3.2M snpset	HumanOrigins	..	..	..	584866	M	..	..	..	..	..	..	..	..	..	..	PASS	..
MOE-495.HO	MOE-495	..	..	2019	JeongNatureEcologyEvolution2019	Modern	0	0	present	..	Mordovian.HO	Mordovia Republic, Lukoyanovsky, Ardatovsky, Chamzinsky, Ichkalovsky districts	Russia	55.08	44.16	1240K pulldown padded to 3.2M snpset	HumanOrigins	..	..	..	584695	M	..	..	..	..	..	..	..	..	..	..	PASS	..
MOE-497.HO	MOE-497	..	..	2019	JeongNatureEcologyEvolution2019	Modern	0	0	present	..	Mordovian.HO	Mordovia Republic, Lukoyanovsky, Ardatovsky, Chamzinsky, Ichkalovsky districts	Russia	55.08	44.16	1240K pulldown padded to 3.2M snpset	HumanOrigins	..	..	..	585075	M	..	..	..	..	..	..	..	..	..	..	PASS	..
Rakr-203.HO	Rakr-203	..	..	2019	JeongNatureEcologyEvolution2019	Modern	0	0	present	..	Russian_Archangelsk_Krasnoborsky.HO	Arkhangelsk region, Krasnoborsky district	Russia	61.56	45.94	1240K pulldown padded to 3.2M snpset	HumanOrigins	..	..	..	582840	M	..	..	..	..	..	..	..	..	..	..	PASS	..
Rakr-205.HO	Rakr-205	..	..	2019	JeongNatureEcologyEvolution2019	Modern	0	0	present	..	Russian_Archangelsk_Krasnoborsky.HO	Arkhangelsk region, Krasnoborsky district	Russia	61.56	45.94	1240K pulldown padded to 3.2M snpset	HumanOrigins	..	..	..	583718	M	..	..	..	..	..	..	..	..	..	..	PASS	..
Rakr-237.HO	Rakr-237	..	..	2019	JeongNatureEcologyEvolution2019	Modern	0	0	present	..	Russian_Archangelsk_Krasnoborsky.HO	Arkhangelsk region, Krasnoborsky district	Russia	61.56	45.94	1240K pulldown padded to 3.2M snpset	HumanOrigins	..	..	..	583915	M	..	..	..	..	..	..	..	..	..	..	PASS	..
Rakr-248.HO	Rakr-248	..	..	2019	JeongNatureEcologyEvolution2019	Modern	0	0	present	..	Russian_Archangelsk_Krasnoborsky.HO	Arkhangelsk region, Krasnoborsky district	Russia	61.56	45.94	1240K pulldown padded to 3.2M snpset	HumanOrigins	..	..	..	581296	M	..	..	..	..	..	..	..	..	..	..	PASS	..
Rakr-341.HO	Rakr-341	..	..	2019	JeongNatureEcologyEvolution2019	Modern	0	0	present	..	Russian_Archangelsk_Krasnoborsky.HO	Arkhangelsk region, Krasnoborsky district	Russia	61.56	45.94	1240K pulldown padded to 3.2M snpset	HumanOrigins	..	..	..	584778	M	..	..	..	..	..	..	..	..	..	..	PASS	..
Rakr-345.HO	Rakr-345	..	..	2019	JeongNatureEcologyEvolution2019	Modern	0	0	present	..	Russian_Archangelsk_Krasnoborsky.HO	Arkhangelsk region, Krasnoborsky district	Russia	61.56	45.94	1240K pulldown padded to 3.2M snpset	HumanOrigins	..	..	..	584754	M	..	..	..	..	..	..	..	..	..	..	PASS	..
Rbgp-200.HO	Rbgp-200	..	..	2019	JeongNatureEcologyEvolution2019	Modern	0	0	present	..	Russian.HO	Belgorod region, Krasnensky, Prohorovsky, Yakovlevsky districts	Russia	50.78	36.48	1240K pulldown padded to 3.2M snpset	HumanOrigins	..	..	..	584157	M	..	..	..	..	..	..	..	..	..	..	PASS	..
Rbgp-201.HO	Rbgp-201	..	..	2019	JeongNatureEcologyEvolution2019	Modern	0	0	present	..	Russian.HO	Belgorod region, Krasnensky, Prohorovsky, Yakovlevsky districts	Russia	50.78	36.48	1240K pulldown padded to 3.2M snpset	HumanOrigins	..	..	..	582733	M	..	..	..	..	..	..	..	..	..	..	PASS	..
Rbgp-203.HO	Rbgp-203	..	..	2019	JeongNatureEcologyEvolution2019	Modern	0	0	present	..	Russian.HO	Belgorod region, Krasnensky, Prohorovsky, Yakovlevsky districts	Russia	50.78	36.48	1240K pulldown padded to 3.2M snpset	HumanOrigins	..	..	..	583945	M	..	..	..	..	..	..	..	..	..	..	PASS	..
Rbgp-205.HO	Rbgp-205	..	..	2019	JeongNatureEcologyEvolution2019	Modern	0	0	present	..	Russian.HO	Belgorod region, Krasnensky, Prohorovsky, Yakovlevsky districts	Russia	50.78	36.48	1240K pulldown padded to 3.2M snpset	HumanOrigins	..	..	..	584005	U	..	..	..	..	..	..	..	..	..	..	PASS	..
Rkbo-12.HO	Rkbo-12	..	..	2019	JeongNatureEcologyEvolution2019	Modern	0	0	present	..	Russian.HO	Kaluga region, Baryatinsky, Borovsky districts	Russia	54.31	34.53	1240K pulldown padded to 3.2M snpset	HumanOrigins	..	..	..	584397	F	..	n/a (female)	n/a (female)	..	..	..	..	..	..	..	PASS	..
Rkbo-16.HO	Rkbo-16	..	..	2019	JeongNatureEcologyEvolution2019	Modern	0	0	present	..	Russian.HO	Kaluga region, Baryatinsky, Borovsky districts	Russia	54.31	34.53	1240K pulldown padded to 3.2M snpset	HumanOrigins	..	..	..	584704	M	..	..	..	..	..	..	..	..	..	..	PASS	..
Rkbo-44.HO	Rkbo-44	..	..	2019	JeongNatureEcologyEvolution2019	Modern	0	0	present	..	Russian.HO	Kaluga region, Baryatinsky, Borovsky districts	Russia	54.31	34.53	1240K pulldown padded to 3.2M snpset	HumanOrigins	..	..	..	584186	M	..	..	..	..	..	..	..	..	..	..	PASS	..
Rkbo-58.HO	Rkbo-58	..	..	2019	JeongNatureEcologyEvolution2019	Modern	0	0	present	..	Russian.HO	Kaluga region, Baryatinsky, Borovsky districts	Russia	54.31	34.53	1240K pulldown padded to 3.2M snpset	HumanOrigins	..	..	..	583187	M	..	..	..	..	..	..	..	..	..	..	PASS	..
Rksh-402.HO	Rksh-402	..	..	2019	JeongNatureEcologyEvolution2019	Modern	0	0	present	..	Russian.HO	Tver region, Kashin district	Russia	57.36	37.61	1240K pulldown padded to 3.2M snpset	HumanOrigins	..	..	..	581345	M	..	..	..	..	..	..	..	..	..	..	PASS	..
Rksh-405.HO	Rksh-405	..	..	2019	JeongNatureEcologyEvolution2019	Modern	0	0	present	..	Russian.HO	Tver region, Kashin district	Russia	57.36	37.61	1240K pulldown padded to 3.2M snpset	HumanOrigins	..	..	..	574876	M	..	..	..	..	..	..	..	..	..	..	PASS	..
Rksh-407.HO	Rksh-407	..	..	2019	JeongNatureEcologyEvolution2019	Modern	0	0	present	..	Russian.HO	Tver region, Kashin district	Russia	57.36	37.61	1240K pulldown padded to 3.2M snpset	HumanOrigins	..	..	..	568105	M	..	..	..	..	..	..	..	..	..	..	PASS	..
Rksh-412.HO	Rksh-412	..	..	2019	JeongNatureEcologyEvolution2019	Modern	0	0	present	..	Russian.HO	Tver region, Kashin district	Russia	57.36	37.61	1240K pulldown padded to 3.2M snpset	HumanOrigins	..	..	..	582888	F	..	n/a (female)	n/a (female)	..	..	..	..	..	..	..	PASS	..
Rkuch-03.HO	Rkuch-03	..	..	2019	JeongNatureEcologyEvolution2019	Modern	0	0	present	..	Russian.HO	Kursk region, Pristensky and Cheremisinovsky districts	Russia	51.89	37.25	1240K pulldown padded to 3.2M snpset	HumanOrigins	..	..	..	583951	M	..	..	..	..	..	..	..	..	..	..	PASS	..
Rkuch-05.HO	Rkuch-05	..	..	2019	JeongNatureEcologyEvolution2019	Modern	0	0	present	..	Russian.HO	Kursk region, Pristensky and Cheremisinovsky districts	Russia	51.89	37.25	1240K pulldown padded to 3.2M snpset	HumanOrigins	..	..	..	583821	M	..	..	..	..	..	..	..	..	..	..	PASS	..
Rkuch-53.HO	Rkuch-53	..	..	2019	JeongNatureEcologyEvolution2019	Modern	0	0	present	..	Russian.HO	Kursk region, Pristensky and Cheremisinovsky districts	Russia	51.89	37.25	1240K pulldown padded to 3.2M snpset	HumanOrigins	..	..	..	581416	M	..	..	..	..	..	..	..	..	..	..	PASS	..
Rkuch-58.HO	Rkuch-58	..	..	2019	JeongNatureEcologyEvolution2019	Modern	0	0	present	..	Russian.HO	Kursk region, Pristensky and Cheremisinovsky districts	Russia	51.89	37.25	1240K pulldown padded to 3.2M snpset	HumanOrigins	..	..	..	584226	M	..	..	..	..	..	..	..	..	..	..	PASS	..
Rorl-102.HO	Rorl-102	..	..	2019	JeongNatureEcologyEvolution2019	Modern	0	0	present	..	Russian.HO	Orel region, Livnensky and Bolhovsky districts	Russia	53.45	36	1240K pulldown padded to 3.2M snpset	HumanOrigins	..	..	..	582937	F	..	n/a (female)	n/a (female)	..	..	..	..	..	..	..	PASS	..
Rorl-110.HO	Rorl-110	..	..	2019	JeongNatureEcologyEvolution2019	Modern	0	0	present	..	Russian.HO	Orel region, Livnensky and Bolhovsky districts	Russia	53.45	36	1240K pulldown padded to 3.2M snpset	HumanOrigins	..	..	..	581338	F	..	n/a (female)	n/a (female)	..	..	..	..	..	..	..	PASS	..
Rorl-114.HO	Rorl-114	..	..	2019	JeongNatureEcologyEvolution2019	Modern	0	0	present	..	Russian.HO	Orel region, Livnensky and Bolhovsky districts	Russia	53.45	36	1240K pulldown padded to 3.2M snpset	HumanOrigins	..	..	..	583645	M	..	..	..	..	..	..	..	..	..	..	PASS	..
Rorl-155.HO	Rorl-155	..	..	2019	JeongNatureEcologyEvolution2019	Modern	0	0	present	..	Russian.HO	Orel region, Livnensky and Bolhovsky districts	Russia	53.45	36	1240K pulldown padded to 3.2M snpset	HumanOrigins	..	..	..	582241	M	..	..	..	..	..	..	..	..	..	..	PASS	..
Rps-002.HO	Rps-002	..	..	2019	JeongNatureEcologyEvolution2019	Modern	0	0	present	..	Russian.HO	Pskov region, Ostrov district	Russia	57.35	28.32	1240K pulldown padded to 3.2M snpset	HumanOrigins	..	..	..	581796	M	..	..	..	..	..	..	..	..	..	..	PASS	..
Rps-004.HO	Rps-004	..	..	2019	JeongNatureEcologyEvolution2019	Modern	0	0	present	..	Russian.HO	Pskov region, Ostrov district	Russia	57.35	28.32	1240K pulldown padded to 3.2M snpset	HumanOrigins	..	..	..	582609	M	..	..	..	..	..	..	..	..	..	..	PASS	..
Rps-006.HO	Rps-006	..	..	2019	JeongNatureEcologyEvolution2019	Modern	0	0	present	..	Russian.HO	Pskov region, Ostrov district	Russia	57.35	28.32	1240K pulldown padded to 3.2M snpset	HumanOrigins	..	..	..	580943	M	..	..	..	..	..	..	..	..	..	..	PASS	..
Rps-012.HO	Rps-012	..	..	2019	JeongNatureEcologyEvolution2019	Modern	0	0	present	..	Russian.HO	Pskov region, Ostrov district	Russia	57.35	28.32	1240K pulldown padded to 3.2M snpset	HumanOrigins	..	..	..	584586	M	..	..	..	..	..	..	..	..	..	..	PASS	..
Rps-090.HO	Rps-090	..	..	2019	JeongNatureEcologyEvolution2019	Modern	0	0	present	..	Russian.HO	Pskov region, Porkhov district	Russia	57.77	29.56	1240K pulldown padded to 3.2M snpset	HumanOrigins	..	..	..	576207	M	..	..	..	..	..	..	..	..	..	..	PASS	..
Rps-091.HO	Rps-091	..	..	2019	JeongNatureEcologyEvolution2019	Modern	0	0	present	..	Russian.HO	Pskov region, Porkhov district	Russia	57.77	29.56	1240K pulldown padded to 3.2M snpset	HumanOrigins	..	..	..	583489	M	..	..	..	..	..	..	..	..	..	..	PASS	..
Rps-098.HO	Rps-098	..	..	2019	JeongNatureEcologyEvolution2019	Modern	0	0	present	..	Russian.HO	Pskov region, Porkhov district	Russia	57.77	29.56	1240K pulldown padded to 3.2M snpset	HumanOrigins	..	..	..	584452	M	..	..	..	..	..	..	..	..	..	..	PASS	..
Rrzm-08.HO	Rrzm-08	..	..	2019	JeongNatureEcologyEvolution2019	Modern	0	0	present	..	Russian.HO	Ryazan region, Mihailovsky district	Russia	54.23	39.03	1240K pulldown padded to 3.2M snpset	HumanOrigins	..	..	..	582731	M	..	..	..	..	..	..	..	..	..	..	PASS	..
Rrzm-10.HO	Rrzm-10	..	..	2019	JeongNatureEcologyEvolution2019	Modern	0	0	present	..	Russian.HO	Ryazan region, Mihailovsky district	Russia	54.23	39.03	1240K pulldown padded to 3.2M snpset	HumanOrigins	..	..	..	571741	F	..	n/a (female)	n/a (female)	..	..	..	..	..	..	..	PASS	..
Rrzm-13.HO	Rrzm-13	..	..	2019	JeongNatureEcologyEvolution2019	Modern	0	0	present	..	Russian.HO	Ryazan region, Mihailovsky district	Russia	54.23	39.03	1240K pulldown padded to 3.2M snpset	HumanOrigins	..	..	..	584152	M	..	..	..	..	..	..	..	..	..	..	PASS	..
Rrzm-16.HO	Rrzm-16	..	..	2019	JeongNatureEcologyEvolution2019	Modern	0	0	present	..	Russian.HO	Ryazan region, Mihailovsky district	Russia	54.23	39.03	1240K pulldown padded to 3.2M snpset	HumanOrigins	..	..	..	578012	M	..	..	..	..	..	..	..	..	..	..	PASS	..
Rrzm-83.HO	Rrzm-83	..	..	2019	JeongNatureEcologyEvolution2019	Modern	0	0	present	..	Russian.HO	Ryazan region, Mihailovsky district	Russia	54.23	39.03	1240K pulldown padded to 3.2M snpset	HumanOrigins	..	..	..	584315	M	..	..	..	..	..	..	..	..	..	..	PASS	..
Rrzs-3.HO	Rrzs-3	..	..	2019	JeongNatureEcologyEvolution2019	Modern	0	0	present	..	Russian.HO	Ryazan region, Spassky district	Russia	54.4	40.53	1240K pulldown padded to 3.2M snpset	HumanOrigins	..	..	..	582085	F	..	n/a (female)	n/a (female)	..	..	..	..	..	..	..	PASS	..
Rrzs-7.HO	Rrzs-7	..	..	2019	JeongNatureEcologyEvolution2019	Modern	0	0	present	..	Russian.HO	Ryazan region, Spassky district	Russia	54.4	40.53	1240K pulldown padded to 3.2M snpset	HumanOrigins	..	..	..	583802	M	..	..	..	..	..	..	..	..	..	..	PASS	..
Rrzs-11.HO	Rrzs-11	..	..	2019	JeongNatureEcologyEvolution2019	Modern	0	0	present	..	Russian.HO	Ryazan region, Spassky district	Russia	54.4	40.53	1240K pulldown padded to 3.2M snpset	HumanOrigins	..	..	..	584238	M	..	..	..	..	..	..	..	..	..	..	PASS	..
Rrzs-32.HO	Rrzs-32	..	..	2019	JeongNatureEcologyEvolution2019	Modern	0	0	present	..	Russian.HO	Ryazan region, Spassky district	Russia	54.4	40.53	1240K pulldown padded to 3.2M snpset	HumanOrigins	..	..	..	584376	F	..	n/a (female)	n/a (female)	..	..	..	..	..	..	..	PASS	..
Rrzs-58.HO	Rrzs-58	..	..	2019	JeongNatureEcologyEvolution2019	Modern	0	0	present	..	Russian.HO	Ryazan region, Spassky district	Russia	54.4	40.53	1240K pulldown padded to 3.2M snpset	HumanOrigins	..	..	..	584433	M	..	..	..	..	..	..	..	..	..	..	PASS	..
Rrzs-66.HO	Rrzs-66	..	..	2019	JeongNatureEcologyEvolution2019	Modern	0	0	present	..	Russian.HO	Ryazan region, Spassky district	Russia	54.4	40.53	1240K pulldown padded to 3.2M snpset	HumanOrigins	..	..	..	583207	M	..	..	..	..	..	..	..	..	..	..	PASS	..
Rrzs-88.HO	Rrzs-88	..	..	2019	JeongNatureEcologyEvolution2019	Modern	0	0	present	..	Russian.HO	Ryazan region, Spassky district	Russia	54.4	40.53	1240K pulldown padded to 3.2M snpset	HumanOrigins	..	..	..	583343	M	..	..	..	..	..	..	..	..	..	..	PASS	..
Rsm-103.HO	Rsm-103	..	..	2019	JeongNatureEcologyEvolution2019	Modern	0	0	present	..	Russian.HO	Smolensk region, Roslavl and Ershichi districts	Russia	53.95	32.87	1240K pulldown padded to 3.2M snpset	HumanOrigins	..	..	..	581396	M	..	..	..	..	..	..	..	..	..	..	PASS	..
Rsm-109.HO	Rsm-109	..	..	2019	JeongNatureEcologyEvolution2019	Modern	0	0	present	..	Russian.HO	Smolensk region, Roslavl and Ershichi districts	Russia	53.95	32.87	1240K pulldown padded to 3.2M snpset	HumanOrigins	..	..	..	584078	M	..	..	..	..	..	..	..	..	..	..	PASS	..
Rsm-166.HO	Rsm-166	..	..	2019	JeongNatureEcologyEvolution2019	Modern	0	0	present	..	Russian.HO	Smolensk region, Roslavl and Ershichi districts	Russia	53.95	32.87	1240K pulldown padded to 3.2M snpset	HumanOrigins	..	..	..	583779	M	..	..	..	..	..	..	..	..	..	..	PASS	..
Rsm-171.HO	Rsm-171	..	..	2019	JeongNatureEcologyEvolution2019	Modern	0	0	present	..	Russian.HO	Smolensk region, Roslavl and Ershichi districts	Russia	53.95	32.87	1240K pulldown padded to 3.2M snpset	HumanOrigins	..	..	..	583623	M	..	..	..	..	..	..	..	..	..	..	PASS	..
Rsm-176.HO	Rsm-176	..	..	2019	JeongNatureEcologyEvolution2019	Modern	0	0	present	..	Russian.HO	Smolensk region, Roslavl and Ershichi districts	Russia	53.95	32.87	1240K pulldown padded to 3.2M snpset	HumanOrigins	..	..	..	582479	M	..	..	..	..	..	..	..	..	..	..	PASS	..
Rsm-179.HO	Rsm-179	..	..	2019	JeongNatureEcologyEvolution2019	Modern	0	0	present	..	Russian.HO	Smolensk region, Roslavl and Ershichi districts	Russia	53.95	32.87	1240K pulldown padded to 3.2M snpset	HumanOrigins	..	..	..	578604	M	..	..	..	..	..	..	..	..	..	..	PASS	..
Rsm-181.HO	Rsm-181	..	..	2019	JeongNatureEcologyEvolution2019	Modern	0	0	present	..	Russian.HO	Smolensk region, Roslavl and Ershichi districts	Russia	53.95	32.87	1240K pulldown padded to 3.2M snpset	HumanOrigins	..	..	..	584468	M	..	..	..	..	..	..	..	..	..	..	PASS	..
RYAR-173.HO	RYAR-173	..	..	2019	JeongNatureEcologyEvolution2019	Modern	0	0	present	..	Russian.HO	Yaroslavl region	Russia	58.03	38.5	1240K pulldown padded to 3.2M snpset	HumanOrigins	..	..	..	581098	M	..	..	..	..	..	..	..	..	..	..	PASS	..
RYAR-223.HO	RYAR-223	..	..	2019	JeongNatureEcologyEvolution2019	Modern	0	0	present	..	Russian.HO	Yaroslavl region	Russia	58.03	38.5	1240K pulldown padded to 3.2M snpset	HumanOrigins	..	..	..	584122	M	..	..	..	..	..	..	..	..	..	..	PASS	..
RYAR-232.HO	RYAR-232	..	..	2019	JeongNatureEcologyEvolution2019	Modern	0	0	present	..	Russian.HO	Yaroslavl region	Russia	58.03	38.5	1240K pulldown padded to 3.2M snpset	HumanOrigins	..	..	..	582071	M	..	..	..	..	..	..	..	..	..	..	PASS	..
Shap-55.HO	Shap-55	..	..	2019	JeongNatureEcologyEvolution2019	Modern	0	0	present	..	Adygei.HO	Krasnodar region, Lazarevsky and Tuapsinsky districts	Russia	44.15	39.12	1240K pulldown padded to 3.2M snpset	HumanOrigins	..	..	..	584456	F	..	n/a (female)	n/a (female)	..	..	..	..	..	..	..	PASS	..
Shap-156.HO	Shap-156	..	..	2019	JeongNatureEcologyEvolution2019	Modern	0	0	present	..	Adygei.HO	Krasnodar region, Lazarevsky and Tuapsinsky districts	Russia	44.15	39.12	1240K pulldown padded to 3.2M snpset	HumanOrigins	..	..	..	584797	M	..	..	..	..	..	..	..	..	..	..	PASS	..
Shap-225.HO	Shap-225	..	..	2019	JeongNatureEcologyEvolution2019	Modern	0	0	present	..	Adygei.HO	Krasnodar region, Lazarevsky and Tuapsinsky districts	Russia	44.15	39.12	1240K pulldown padded to 3.2M snpset	HumanOrigins	..	..	..	585014	M	..	..	..	..	..	..	..	..	..	..	PASS	..
UKR-1283.HO	UKR-1283	..	..	2019	JeongNatureEcologyEvolution2019	Modern	0	0	present	..	Ukrainian.HO	Sumskaya region	Ukraine	50.82	33.87	1240K pulldown padded to 3.2M snpset	HumanOrigins	..	..	..	584399	M	..	..	..	..	..	..	..	..	..	..	PASS	..
UKR-1291.HO	UKR-1291	..	..	2019	JeongNatureEcologyEvolution2019	Modern	0	0	present	..	Ukrainian.HO	Sumskaya region	Ukraine	50.82	33.87	1240K pulldown padded to 3.2M snpset	HumanOrigins	..	..	..	584699	M	..	..	..	..	..	..	..	..	..	..	PASS	..
UKR-1292.HO	UKR-1292	..	..	2019	JeongNatureEcologyEvolution2019	Modern	0	0	present	..	Ukrainian.HO	Sumskaya region	Ukraine	50.82	33.87	1240K pulldown padded to 3.2M snpset	HumanOrigins	..	..	..	584263	M	..	..	..	..	..	..	..	..	..	..	PASS	..
UKR-1377.HO	UKR-1377	..	..	2019	JeongNatureEcologyEvolution2019	Modern	0	0	present	..	Ukrainian.HO	Sumskaya region	Ukraine	50.82	33.87	1240K pulldown padded to 3.2M snpset	HumanOrigins	..	..	..	585007	M	..	..	..	..	..	..	..	..	..	..	PASS	..
UKR-1399.HO	UKR-1399	..	..	2019	JeongNatureEcologyEvolution2019	Modern	0	0	present	..	Ukrainian_North.HO	Sumskaya region	Ukraine	50.82	33.87	1240K pulldown padded to 3.2M snpset	HumanOrigins	..	..	..	584264	M	..	..	..	..	..	..	..	..	..	..	PASS	..
UKR-1903.HO	UKR-1903	..	..	2019	JeongNatureEcologyEvolution2019	Modern	0	0	present	..	Ukrainian_North.HO	Zhitomirskaya region	Ukraine	50.52	28.55	1240K pulldown padded to 3.2M snpset	HumanOrigins	..	..	..	565511	M	..	..	..	..	..	..	..	..	..	..	PASS	..
UKR-1909.HO	UKR-1909	..	..	2019	JeongNatureEcologyEvolution2019	Modern	0	0	present	..	Ukrainian_North.HO	Zhitomirskaya region	Ukraine	50.52	28.55	1240K pulldown padded to 3.2M snpset	HumanOrigins	..	..	..	584298	M	..	..	..	..	..	..	..	..	..	..	PASS	..
UKR-1913.HO	UKR-1913	..	..	2019	JeongNatureEcologyEvolution2019	Modern	0	0	present	..	Ukrainian_North.HO	Zhitomirskaya region	Ukraine	50.52	28.55	1240K pulldown padded to 3.2M snpset	HumanOrigins	..	..	..	584238	M	..	..	..	..	..	..	..	..	..	..	PASS	..
UKR-1951.HO	UKR-1951	..	..	2019	JeongNatureEcologyEvolution2019	Modern	0	0	present	..	Ukrainian_North.HO	Rovenskaya region	Ukraine	51.32	26.58	1240K pulldown padded to 3.2M snpset	HumanOrigins	..	..	..	584792	M	..	..	..	..	..	..	..	..	..	..	PASS	..
UKR-1978.HO	UKR-1978	..	..	2019	JeongNatureEcologyEvolution2019	Modern	0	0	present	..	Ukrainian_North.HO	Rovenskaya region	Ukraine	51.32	26.58	1240K pulldown padded to 3.2M snpset	HumanOrigins	..	..	..	582470	M	..	..	..	..	..	..	..	..	..	..	PASS	..
UKR-1992.HO	UKR-1992	..	..	2019	JeongNatureEcologyEvolution2019	Modern	0	0	present	..	Ukrainian_North.HO	Rovenskaya region	Ukraine	51.32	26.58	1240K pulldown padded to 3.2M snpset	HumanOrigins	..	..	..	584529	M	..	..	..	..	..	..	..	..	..	..	PASS	..
UKR-2021.HO	UKR-2021	..	..	2019	JeongNatureEcologyEvolution2019	Modern	0	0	present	..	Ukrainian_North.HO	Zhitomirskaya region	Ukraine	50.52	28.55	1240K pulldown padded to 3.2M snpset	HumanOrigins	..	..	..	584333	M	..	..	..	..	..	..	..	..	..	..	PASS	..
YY-2.HO	YY-2	..	..	2019	JeongNatureEcologyEvolution2019	Modern	0	0	present	..	Adygei.HO	Adyghei Republic, Takhtamukayski district	Russia	44.89	39.24	1240K pulldown padded to 3.2M snpset	HumanOrigins	..	..	..	584420	M	..	..	..	..	..	..	..	..	..	..	PASS	..
YY-18.HO	YY-18	..	..	2019	JeongNatureEcologyEvolution2019	Modern	0	0	present	..	Adygei.HO	Adyghei Republic, Takhtamukayski district	Russia	44.89	39.24	1240K pulldown padded to 3.2M snpset	HumanOrigins	..	..	..	584701	M	..	..	..	..	..	..	..	..	..	..	PASS	..
YY-36.HO	YY-36	..	..	2019	JeongNatureEcologyEvolution2019	Modern	0	0	present	..	Adygei.HO	Adyghei Republic, Takhtamukayski district	Russia	44.89	39.24	1240K pulldown padded to 3.2M snpset	HumanOrigins	..	..	..	584641	M	..	..	..	..	..	..	..	..	..	..	PASS	..
HGDP00511.HO	HGDP00511	..	..	2012	PattersonGenetics2012	Modern	0	0	present	..	French.HO	..	France	46	2	1240K pulldown padded to 3.2M snpset	HumanOrigins	..	..	..	592628	M	..	..	..	..	..	..	..	..	..	..	PASS	..
HGDP00512.HO	HGDP00512	..	..	2012	PattersonGenetics2012	Modern	0	0	present	..	French.HO	..	France	46	2	1240K pulldown padded to 3.2M snpset	HumanOrigins	..	..	..	591858	M	..	..	..	..	..	..	..	..	..	..	PASS	..
HGDP00513.HO	HGDP00513	..	..	2012	PattersonGenetics2012	Modern	0	0	present	..	French.HO	..	France	46	2	1240K pulldown padded to 3.2M snpset	HumanOrigins	..	..	..	592190	F	..	n/a (female)	n/a (female)	..	..	..	..	..	..	..	PASS	..
HGDP00514.HO	HGDP00514	..	..	2012	PattersonGenetics2012	Modern	0	0	present	..	French.HO	..	France	46	2	1240K pulldown padded to 3.2M snpset	HumanOrigins	..	..	..	590295	F	..	n/a (female)	n/a (female)	..	..	..	..	..	..	..	PASS	..
HGDP00515.HO	HGDP00515	..	..	2012	PattersonGenetics2012	Modern	0	0	present	..	French.HO	..	France	46	2	1240K pulldown padded to 3.2M snpset	HumanOrigins	..	..	..	592490	M	..	..	..	..	..	..	..	..	..	..	PASS	..
HGDP00516.HO	HGDP00516	..	..	2012	PattersonGenetics2012	Modern	0	0	present	..	French.HO	..	France	46	2	1240K pulldown padded to 3.2M snpset	HumanOrigins	..	..	..	591823	F	..	n/a (female)	n/a (female)	..	..	..	..	..	..	..	PASS	..
HGDP00517.HO	HGDP00517	..	..	2012	PattersonGenetics2012	Modern	0	0	present	..	French.HO	..	France	46	2	1240K pulldown padded to 3.2M snpset	HumanOrigins	..	..	..	591600	F	..	n/a (female)	n/a (female)	..	..	..	..	..	..	..	PASS	..
HGDP00518.HO	HGDP00518	..	..	2012	PattersonGenetics2012	Modern	0	0	present	..	French.HO	..	France	46	2	1240K pulldown padded to 3.2M snpset	HumanOrigins	..	..	..	592251	M	..	..	..	..	..	..	..	..	..	..	PASS	..
HGDP00519.HO	HGDP00519	..	..	2012	PattersonGenetics2012	Modern	0	0	present	..	French.HO	..	France	46	2	1240K pulldown padded to 3.2M snpset	HumanOrigins	..	..	..	592545	M	..	..	..	..	..	..	..	..	..	..	PASS	..
HGDP00522.HO	HGDP00522	..	..	2012	PattersonGenetics2012	Modern	0	0	present	..	French.HO	..	France	46	2	1240K pulldown padded to 3.2M snpset	HumanOrigins	..	..	..	592106	M	..	..	..	..	..	..	..	..	..	..	PASS	..
HGDP00523.HO	HGDP00523	..	..	2012	PattersonGenetics2012	Modern	0	0	present	..	French.HO	..	France	46	2	1240K pulldown padded to 3.2M snpset	HumanOrigins	..	..	..	590852	F	..	n/a (female)	n/a (female)	..	..	..	..	..	..	..	PASS	..
HGDP00524.HO	HGDP00524	..	..	2012	PattersonGenetics2012	Modern	0	0	present	..	French.HO	..	France	46	2	1240K pulldown padded to 3.2M snpset	HumanOrigins	..	..	..	590607	F	..	n/a (female)	n/a (female)	..	..	..	..	..	..	..	PASS	..
HGDP00525.HO	HGDP00525	..	..	2012	PattersonGenetics2012	Modern	0	0	present	..	French.HO	..	France	46	2	1240K pulldown padded to 3.2M snpset	HumanOrigins	..	..	..	592211	M	..	..	..	..	..	..	..	..	..	..	PASS	..
HGDP00526.HO	HGDP00526	..	..	2012	PattersonGenetics2012	Modern	0	0	present	..	French.HO	..	France	46	2	1240K pulldown padded to 3.2M snpset	HumanOrigins	..	..	..	592464	F	..	n/a (female)	n/a (female)	..	..	..	..	..	..	..	PASS	..
HGDP00527.HO	HGDP00527	..	..	2012	PattersonGenetics2012	Modern	0	0	present	..	French.HO	..	France	46	2	1240K pulldown padded to 3.2M snpset	HumanOrigins	..	..	..	591371	F	..	n/a (female)	n/a (female)	..	..	..	..	..	..	..	PASS	..
HGDP00528.HO	HGDP00528	..	..	2012	PattersonGenetics2012	Modern	0	0	present	..	French.HO	..	France	46	2	1240K pulldown padded to 3.2M snpset	HumanOrigins	..	..	..	589645	M	..	..	..	..	..	..	..	..	..	..	PASS	..
HGDP00529.HO	HGDP00529	..	..	2012	PattersonGenetics2012	Modern	0	0	present	..	French.HO	..	France	46	2	1240K pulldown padded to 3.2M snpset	HumanOrigins	..	..	..	587236	F	..	n/a (female)	n/a (female)	..	..	..	..	..	..	..	PASS	..
HGDP00530.HO	HGDP00530	..	..	2012	PattersonGenetics2012	Modern	0	0	present	..	French_o.HO	..	France	46	2	1240K pulldown padded to 3.2M snpset	HumanOrigins	..	..	..	592480	M	..	..	..	..	..	..	..	..	..	..	PASS	..
HGDP00531.HO	HGDP00531	..	..	2012	PattersonGenetics2012	Modern	0	0	present	..	French.HO	..	France	46	2	1240K pulldown padded to 3.2M snpset	HumanOrigins	..	..	..	588433	F	..	n/a (female)	n/a (female)	..	..	..	..	..	..	..	PASS	..
HGDP00533.HO	HGDP00533	..	..	2012	PattersonGenetics2012	Modern	0	0	present	..	French.HO	..	France	46	2	1240K pulldown padded to 3.2M snpset	HumanOrigins	..	..	..	592621	M	..	..	..	..	..	..	..	..	..	..	PASS	..
HGDP00534.HO	HGDP00534	..	..	2012	PattersonGenetics2012	Modern	0	0	present	..	French.HO	..	France	46	2	1240K pulldown padded to 3.2M snpset	HumanOrigins	..	..	..	585494	F	..	n/a (female)	n/a (female)	..	..	..	..	..	..	..	PASS	..
HGDP00535.HO	HGDP00535	..	..	2012	PattersonGenetics2012	Modern	0	0	present	..	French.HO	..	France	46	2	1240K pulldown padded to 3.2M snpset	HumanOrigins	..	..	..	591771	F	..	n/a (female)	n/a (female)	..	..	..	..	..	..	..	PASS	..
HGDP00536.HO	HGDP00536	..	..	2012	PattersonGenetics2012	Modern	0	0	present	..	French.HO	..	France	46	2	1240K pulldown padded to 3.2M snpset	HumanOrigins	..	..	..	584939	F	..	n/a (female)	n/a (female)	..	..	..	..	..	..	..	PASS	..
HGDP00537.HO	HGDP00537	..	..	2012	PattersonGenetics2012	Modern	0	0	present	..	French.HO	..	France	46	2	1240K pulldown padded to 3.2M snpset	HumanOrigins	..	..	..	591309	F	..	n/a (female)	n/a (female)	..	..	..	..	..	..	..	PASS	..
HGDP00538.HO	HGDP00538	..	..	2012	PattersonGenetics2012	Modern	0	0	present	..	French.HO	..	France	46	2	1240K pulldown padded to 3.2M snpset	HumanOrigins	..	..	..	592753	M	..	..	..	..	..	..	..	..	..	..	PASS	..
HGDP00539.HO	HGDP00539	..	..	2012	PattersonGenetics2012	Modern	0	0	present	..	French.HO	..	France	46	2	1240K pulldown padded to 3.2M snpset	HumanOrigins	..	..	..	587281	F	..	n/a (female)	n/a (female)	..	..	..	..	..	..	..	PASS	..
HGDP00557.HO	HGDP00557	..	..	2012	PattersonGenetics2012	Modern	0	0	present	..	Druze.HO	..	Israel	32	35	1240K pulldown padded to 3.2M snpset	HumanOrigins	..	..	..	591473	F	..	n/a (female)	n/a (female)	..	..	..	..	..	..	..	PASS	..
HGDP00558.HO	HGDP00558	..	..	2012	PattersonGenetics2012	Modern	0	0	present	..	Druze.HO	..	Israel	32	35	1240K pulldown padded to 3.2M snpset	HumanOrigins	..	..	..	592068	F	..	n/a (female)	n/a (female)	..	..	..	..	..	..	..	PASS	..
HGDP00559.HO	HGDP00559	..	..	2012	PattersonGenetics2012	Modern	0	0	present	..	Druze.HO	..	Israel	32	35	1240K pulldown padded to 3.2M snpset	HumanOrigins	..	..	..	591215	F	..	n/a (female)	n/a (female)	..	..	..	..	..	..	..	PASS	..
HGDP00560.HO	HGDP00560	..	..	2012	PattersonGenetics2012	Modern	0	0	present	..	Druze.HO	..	Israel	32	35	1240K pulldown padded to 3.2M snpset	HumanOrigins	..	..	..	592481	F	..	n/a (female)	n/a (female)	..	..	..	..	..	..	..	PASS	..
HGDP00561.HO	HGDP00561	..	..	2012	PattersonGenetics2012	Modern	0	0	present	..	Druze.HO	..	Israel	32	35	1240K pulldown padded to 3.2M snpset	HumanOrigins	..	..	..	587861	F	..	n/a (female)	n/a (female)	..	..	..	..	..	..	..	PASS	..
HGDP00562.HO	HGDP00562	..	..	2012	PattersonGenetics2012	Modern	0	0	present	..	Druze.HO	..	Israel	32	35	1240K pulldown padded to 3.2M snpset	HumanOrigins	..	..	..	592429	M	..	..	..	..	..	..	..	..	..	..	PASS	..
HGDP00563.HO	HGDP00563	..	..	2012	PattersonGenetics2012	Modern	0	0	present	..	Druze.HO	..	Israel	32	35	1240K pulldown padded to 3.2M snpset	HumanOrigins	..	..	..	591258	F	..	n/a (female)	n/a (female)	..	..	..	..	..	..	..	PASS	..
HGDP00564.HO	HGDP00564	..	..	2012	PattersonGenetics2012	Modern	0	0	present	..	Druze.HO	..	Israel	32	35	1240K pulldown padded to 3.2M snpset	HumanOrigins	..	..	..	588899	F	..	n/a (female)	n/a (female)	..	..	..	..	..	..	..	PASS	..
HGDP00565.HO	HGDP00565	..	..	2012	PattersonGenetics2012	Modern	0	0	present	..	Druze.HO	..	Israel	32	35	1240K pulldown padded to 3.2M snpset	HumanOrigins	..	..	..	592282	F	..	n/a (female)	n/a (female)	..	..	..	..	..	..	..	PASS	..
HGDP00566.HO	HGDP00566	..	..	2012	PattersonGenetics2012	Modern	0	0	present	..	Druze.HO	..	Israel	32	35	1240K pulldown padded to 3.2M snpset	HumanOrigins	..	..	..	588889	F	..	n/a (female)	n/a (female)	..	..	..	..	..	..	..	PASS	..
HGDP00567.HO	HGDP00567	..	..	2012	PattersonGenetics2012	Modern	0	0	present	..	Druze.HO	..	Israel	32	35	1240K pulldown padded to 3.2M snpset	HumanOrigins	..	..	..	591439	F	..	n/a (female)	n/a (female)	..	..	..	..	..	..	..	PASS	..
HGDP00568.HO	HGDP00568	..	..	2012	PattersonGenetics2012	Modern	0	0	present	..	Druze.HO	..	Israel	32	35	1240K pulldown padded to 3.2M snpset	HumanOrigins	..	..	..	591882	U	..	..	..	..	..	..	..	..	..	..	PASS	..
HGDP00569.HO	HGDP00569	..	..	2012	PattersonGenetics2012	Modern	0	0	present	..	Druze.HO	..	Israel	32	35	1240K pulldown padded to 3.2M snpset	HumanOrigins	..	..	..	591728	F	..	n/a (female)	n/a (female)	..	..	..	..	..	..	..	PASS	..
HGDP00571.HO	HGDP00571	..	..	2012	PattersonGenetics2012	Modern	0	0	present	..	Druze.HO	..	Israel	32	35	1240K pulldown padded to 3.2M snpset	HumanOrigins	..	..	..	591691	F	..	n/a (female)	n/a (female)	..	..	..	..	..	..	..	PASS	..
HGDP00572.HO	HGDP00572	..	..	2012	PattersonGenetics2012	Modern	0	0	present	..	Druze.HO	..	Israel	32	35	1240K pulldown padded to 3.2M snpset	HumanOrigins	..	..	..	591421	F	..	n/a (female)	n/a (female)	..	..	..	..	..	..	..	PASS	..
HGDP00573.HO	HGDP00573	..	..	2012	PattersonGenetics2012	Modern	0	0	present	..	Druze.HO	..	Israel	32	35	1240K pulldown padded to 3.2M snpset	HumanOrigins	..	..	..	591288	F	..	n/a (female)	n/a (female)	..	..	..	..	..	..	..	PASS	..
HGDP00574.HO	HGDP00574	..	..	2012	PattersonGenetics2012	Modern	0	0	present	..	Druze.HO	..	Israel	32	35	1240K pulldown padded to 3.2M snpset	HumanOrigins	..	..	..	589508	F	..	n/a (female)	n/a (female)	..	..	..	..	..	..	..	PASS	..
HGDP00575.HO	HGDP00575	..	..	2012	PattersonGenetics2012	Modern	0	0	present	..	Druze.HO	..	Israel	32	35	1240K pulldown padded to 3.2M snpset	HumanOrigins	..	..	..	590807	F	..	n/a (female)	n/a (female)	..	..	..	..	..	..	..	PASS	..
HGDP00577.HO	HGDP00577	..	..	2012	PattersonGenetics2012	Modern	0	0	present	..	Druze.HO	..	Israel	32	35	1240K pulldown padded to 3.2M snpset	HumanOrigins	..	..	..	586108	F	..	n/a (female)	n/a (female)	..	..	..	..	..	..	..	PASS	..
HGDP00578.HO	HGDP00578	..	..	2012	PattersonGenetics2012	Modern	0	0	present	..	Druze.HO	..	Israel	32	35	1240K pulldown padded to 3.2M snpset	HumanOrigins	..	..	..	591711	F	..	n/a (female)	n/a (female)	..	..	..	..	..	..	..	PASS	..
HGDP00579.HO	HGDP00579	..	..	2012	PattersonGenetics2012	Modern	0	0	present	..	Druze.HO	..	Israel	32	35	1240K pulldown padded to 3.2M snpset	HumanOrigins	..	..	..	590874	F	..	n/a (female)	n/a (female)	..	..	..	..	..	..	..	PASS	..
HGDP00580.HO	HGDP00580	..	..	2012	PattersonGenetics2012	Modern	0	0	present	..	Druze.HO	..	Israel	32	35	1240K pulldown padded to 3.2M snpset	HumanOrigins	..	..	..	591642	M	..	..	..	..	..	..	..	..	..	..	PASS	..
HGDP00582.HO	HGDP00582	..	..	2012	PattersonGenetics2012	Modern	0	0	present	..	Druze.HO	..	Israel	32	35	1240K pulldown padded to 3.2M snpset	HumanOrigins	..	..	..	592588	F	..	n/a (female)	n/a (female)	..	..	..	..	..	..	..	PASS	..
HGDP00583.HO	HGDP00583	..	..	2012	PattersonGenetics2012	Modern	0	0	present	..	Druze.HO	..	Israel	32	35	1240K pulldown padded to 3.2M snpset	HumanOrigins	..	..	..	592337	F	..	n/a (female)	n/a (female)	..	..	..	..	..	..	..	PASS	..
HGDP00584.HO	HGDP00584	..	..	2012	PattersonGenetics2012	Modern	0	0	present	..	Druze.HO	..	Israel	32	35	1240K pulldown padded to 3.2M snpset	HumanOrigins	..	..	..	588755	F	..	n/a (female)	n/a (female)	..	..	..	..	..	..	..	PASS	..
HGDP00586.HO	HGDP00586	..	..	2012	PattersonGenetics2012	Modern	0	0	present	..	Druze.HO	..	Israel	32	35	1240K pulldown padded to 3.2M snpset	HumanOrigins	..	..	..	591513	F	..	n/a (female)	n/a (female)	..	..	..	..	..	..	..	PASS	..
HGDP00587.HO	HGDP00587	..	..	2012	PattersonGenetics2012	Modern	0	0	present	..	Druze.HO	..	Israel	32	35	1240K pulldown padded to 3.2M snpset	HumanOrigins	..	..	..	592045	F	..	n/a (female)	n/a (female)	..	..	..	..	..	..	..	PASS	..
HGDP00588.HO	HGDP00588	..	..	2012	PattersonGenetics2012	Modern	0	0	present	..	Druze.HO	..	Israel	32	35	1240K pulldown padded to 3.2M snpset	HumanOrigins	..	..	..	584343	M	..	..	..	..	..	..	..	..	..	..	PASS	..
HGDP00591.HO	HGDP00591	..	..	2012	PattersonGenetics2012	Modern	0	0	present	..	Druze.HO	..	Israel	32	35	1240K pulldown padded to 3.2M snpset	HumanOrigins	..	..	..	592633	F	..	n/a (female)	n/a (female)	..	..	..	..	..	..	..	PASS	..
HGDP00594.HO	HGDP00594	..	..	2012	PattersonGenetics2012	Modern	0	0	present	..	Druze.HO	..	Israel	32	35	1240K pulldown padded to 3.2M snpset	HumanOrigins	..	..	..	591323	M	..	..	..	..	..	..	..	..	..	..	PASS	..
HGDP00595.HO	HGDP00595	..	..	2012	PattersonGenetics2012	Modern	0	0	present	..	Druze.HO	..	Israel	32	35	1240K pulldown padded to 3.2M snpset	HumanOrigins	..	..	..	590517	M	..	..	..	..	..	..	..	..	..	..	PASS	..
HGDP00597.HO	HGDP00597	..	..	2012	PattersonGenetics2012	Modern	0	0	present	..	Druze.HO	..	Israel	32	35	1240K pulldown padded to 3.2M snpset	HumanOrigins	..	..	..	591697	M	..	..	..	..	..	..	..	..	..	..	PASS	..
HGDP00598.HO	HGDP00598	..	..	2012	PattersonGenetics2012	Modern	0	0	present	..	Druze.HO	..	Israel	32	35	1240K pulldown padded to 3.2M snpset	HumanOrigins	..	..	..	592779	M	..	..	..	..	..	..	..	..	..	..	PASS	..
HGDP00599.HO	HGDP00599	..	..	2012	PattersonGenetics2012	Modern	0	0	present	..	Druze.HO	..	Israel	32	35	1240K pulldown padded to 3.2M snpset	HumanOrigins	..	..	..	591091	M	..	..	..	..	..	..	..	..	..	..	PASS	..
HGDP00600.HO	HGDP00600	..	..	2012	PattersonGenetics2012	Modern	0	0	present	..	Druze.HO	..	Israel	32	35	1240K pulldown padded to 3.2M snpset	HumanOrigins	..	..	..	586026	M	..	..	..	..	..	..	..	..	..	..	PASS	..
HGDP00601.HO	HGDP00601	..	..	2012	PattersonGenetics2012	Modern	0	0	present	..	Druze.HO	..	Israel	32	35	1240K pulldown padded to 3.2M snpset	HumanOrigins	..	..	..	592063	F	..	n/a (female)	n/a (female)	..	..	..	..	..	..	..	PASS	..
HGDP00602.HO	HGDP00602	..	..	2012	PattersonGenetics2012	Modern	0	0	present	..	Druze.HO	..	Israel	32	35	1240K pulldown padded to 3.2M snpset	HumanOrigins	..	..	..	588264	M	..	..	..	..	..	..	..	..	..	..	PASS	..
HGDP00604.HO	HGDP00604	..	..	2012	PattersonGenetics2012	Modern	0	0	present	..	Druze.HO	..	Israel	32	35	1240K pulldown padded to 3.2M snpset	HumanOrigins	..	..	..	591686	M	..	..	..	..	..	..	..	..	..	..	PASS	..
HGDP00606.HO	HGDP00606	..	..	2012	PattersonGenetics2012	Modern	0	0	present	..	Druze.HO	..	Israel	32	35	1240K pulldown padded to 3.2M snpset	HumanOrigins	..	..	..	592752	F	..	n/a (female)	n/a (female)	..	..	..	..	..	..	..	PASS	..
HGDP00607.HO	HGDP00607	..	..	2012	PattersonGenetics2012	Modern	0	0	present	..	BedouinB.HO	..	Israel	31	35	1240K pulldown padded to 3.2M snpset	HumanOrigins	..	..	..	591288	F	..	n/a (female)	n/a (female)	..	..	..	..	..	..	..	PASS	..
HGDP00608.HO	HGDP00608	..	..	2012	PattersonGenetics2012	Modern	0	0	present	..	BedouinB.HO	..	Israel	31	35	1240K pulldown padded to 3.2M snpset	HumanOrigins	..	..	..	591953	M	..	..	..	..	..	..	..	..	..	..	PASS	..
HGDP00609.HO	HGDP00609	..	..	2012	PattersonGenetics2012	Modern	0	0	present	..	BedouinA.HO	..	Israel	31	35	1240K pulldown padded to 3.2M snpset	HumanOrigins	..	..	..	592455	M	..	..	..	..	..	..	..	..	..	..	PASS	..
HGDP00610.HO	HGDP00610	..	..	2012	PattersonGenetics2012	Modern	0	0	present	..	BedouinB.HO	..	Israel	31	35	1240K pulldown padded to 3.2M snpset	HumanOrigins	..	..	..	591748	M	..	..	..	..	..	..	..	..	..	..	PASS	..
HGDP00611.HO	HGDP00611	..	..	2012	PattersonGenetics2012	Modern	0	0	present	..	BedouinA.HO	..	Israel	31	35	1240K pulldown padded to 3.2M snpset	HumanOrigins	..	..	..	592557	M	..	..	..	..	..	..	..	..	..	..	PASS	..
HGDP00612.HO	HGDP00612	..	..	2012	PattersonGenetics2012	Modern	0	0	present	..	BedouinB.HO	..	Israel	31	35	1240K pulldown padded to 3.2M snpset	HumanOrigins	..	..	..	592449	F	..	n/a (female)	n/a (female)	..	..	..	..	..	..	..	PASS	..
HGDP00613.HO	HGDP00613	..	..	2012	PattersonGenetics2012	Modern	0	0	present	..	BedouinA.HO	..	Israel	31	35	1240K pulldown padded to 3.2M snpset	HumanOrigins	..	..	..	592418	F	..	n/a (female)	n/a (female)	..	..	..	..	..	..	..	PASS	..
HGDP00614.HO	HGDP00614	..	..	2012	PattersonGenetics2012	Modern	0	0	present	..	BedouinA.HO	..	Israel	31	35	1240K pulldown padded to 3.2M snpset	HumanOrigins	..	..	..	592594	F	..	n/a (female)	n/a (female)	..	..	..	..	..	..	..	PASS	..
HGDP00615.HO	HGDP00615	..	..	2012	PattersonGenetics2012	Modern	0	0	present	..	BedouinA.HO	..	Israel	31	35	1240K pulldown padded to 3.2M snpset	HumanOrigins	..	..	..	592066	F	..	n/a (female)	n/a (female)	..	..	..	..	..	..	..	PASS	..
HGDP00616.HO	HGDP00616	..	..	2012	PattersonGenetics2012	Modern	0	0	present	..	BedouinB.HO	..	Israel	31	35	1240K pulldown padded to 3.2M snpset	HumanOrigins	..	..	..	592543	M	..	..	..	..	..	..	..	..	..	..	PASS	..
HGDP00618.HO	HGDP00618	..	..	2012	PattersonGenetics2012	Modern	0	0	present	..	BedouinB.HO	..	Israel	31	35	1240K pulldown padded to 3.2M snpset	HumanOrigins	..	..	..	592137	M	..	..	..	..	..	..	..	..	..	..	PASS	..
HGDP00619.HO	HGDP00619	..	..	2012	PattersonGenetics2012	Modern	0	0	present	..	BedouinA.HO	..	Israel	31	35	1240K pulldown padded to 3.2M snpset	HumanOrigins	..	..	..	592112	M	..	..	..	..	..	..	..	..	..	..	PASS	..
HGDP00620.HO	HGDP00620	..	..	2012	PattersonGenetics2012	Modern	0	0	present	..	BedouinA.HO	..	Israel	31	35	1240K pulldown padded to 3.2M snpset	HumanOrigins	..	..	..	592309	M	..	..	..	..	..	..	..	..	..	..	PASS	..
HGDP00622.HO	HGDP00622	..	..	2012	PattersonGenetics2012	Modern	0	0	present	..	BedouinA.HO	..	Israel	31	35	1240K pulldown padded to 3.2M snpset	HumanOrigins	..	..	..	592286	M	..	..	..	..	..	..	..	..	..	..	PASS	..
HGDP00623.HO	HGDP00623	..	..	2012	PattersonGenetics2012	Modern	0	0	present	..	BedouinB.HO	..	Israel	31	35	1240K pulldown padded to 3.2M snpset	HumanOrigins	..	..	..	592382	M	..	..	..	..	..	..	..	..	..	..	PASS	..
HGDP00624.HO	HGDP00624	..	..	2012	PattersonGenetics2012	Modern	0	0	present	..	BedouinB.HO	..	Israel	31	35	1240K pulldown padded to 3.2M snpset	HumanOrigins	..	..	..	592397	M	..	..	..	..	..	..	..	..	..	..	PASS	..
HGDP00625.HO	HGDP00625	..	..	2012	PattersonGenetics2012	Modern	0	0	present	..	BedouinA.HO	..	Israel	31	35	1240K pulldown padded to 3.2M snpset	HumanOrigins	..	..	..	591972	M	..	..	..	..	..	..	..	..	..	..	PASS	..
HGDP00626.HO	HGDP00626	..	..	2012	PattersonGenetics2012	Modern	0	0	present	..	BedouinA.HO	..	Israel	31	35	1240K pulldown padded to 3.2M snpset	HumanOrigins	..	..	..	592184	M	..	..	..	..	..	..	..	..	..	..	PASS	..
HGDP00628.HO	HGDP00628	..	..	2012	PattersonGenetics2012	Modern	0	0	present	..	BedouinA.HO	..	Israel	31	35	1240K pulldown padded to 3.2M snpset	HumanOrigins	..	..	..	592296	M	..	..	..	..	..	..	..	..	..	..	PASS	..
HGDP00629.HO	HGDP00629	..	..	2012	PattersonGenetics2012	Modern	0	0	present	..	BedouinA.HO	..	Israel	31	35	1240K pulldown padded to 3.2M snpset	HumanOrigins	..	..	..	592363	M	..	..	..	..	..	..	..	..	..	..	PASS	..
HGDP00630.HO	HGDP00630	..	..	2012	PattersonGenetics2012	Modern	0	0	present	..	BedouinB.HO	..	Israel	31	35	1240K pulldown padded to 3.2M snpset	HumanOrigins	..	..	..	592082	M	..	..	..	..	..	..	..	..	..	..	PASS	..
HGDP00631.HO	HGDP00631	..	..	2012	PattersonGenetics2012	Modern	0	0	present	..	BedouinB.HO	..	Israel	31	35	1240K pulldown padded to 3.2M snpset	HumanOrigins	..	..	..	592574	M	..	..	..	..	..	..	..	..	..	..	PASS	..
HGDP00632.HO	HGDP00632	..	..	2012	PattersonGenetics2012	Modern	0	0	present	..	BedouinA.HO	..	Israel	31	35	1240K pulldown padded to 3.2M snpset	HumanOrigins	..	..	..	589219	F	..	n/a (female)	n/a (female)	..	..	..	..	..	..	..	PASS	..
HGDP00634.HO	HGDP00634	..	..	2012	PattersonGenetics2012	Modern	0	0	present	..	BedouinA.HO	..	Israel	31	35	1240K pulldown padded to 3.2M snpset	HumanOrigins	..	..	..	591989	F	..	n/a (female)	n/a (female)	..	..	..	..	..	..	..	PASS	..
HGDP00635.HO	HGDP00635	..	..	2012	PattersonGenetics2012	Modern	0	0	present	..	BedouinA.HO	..	Israel	31	35	1240K pulldown padded to 3.2M snpset	HumanOrigins	..	..	..	592316	F	..	n/a (female)	n/a (female)	..	..	..	..	..	..	..	PASS	..
HGDP00636.HO	HGDP00636	..	..	2012	PattersonGenetics2012	Modern	0	0	present	..	BedouinB.HO	..	Israel	31	35	1240K pulldown padded to 3.2M snpset	HumanOrigins	..	..	..	592075	F	..	n/a (female)	n/a (female)	..	..	..	..	..	..	..	PASS	..
HGDP00637.HO	HGDP00637	..	..	2012	PattersonGenetics2012	Modern	0	0	present	..	BedouinA.HO	..	Israel	31	35	1240K pulldown padded to 3.2M snpset	HumanOrigins	..	..	..	592241	F	..	n/a (female)	n/a (female)	..	..	..	..	..	..	..	PASS	..
HGDP00638.HO	HGDP00638	..	..	2012	PattersonGenetics2012	Modern	0	0	present	..	BedouinA.HO	..	Israel	31	35	1240K pulldown padded to 3.2M snpset	HumanOrigins	..	..	..	591724	F	..	n/a (female)	n/a (female)	..	..	..	..	..	..	..	PASS	..
HGDP00639.HO	HGDP00639	..	..	2012	PattersonGenetics2012	Modern	0	0	present	..	BedouinA.HO	..	Israel	31	35	1240K pulldown padded to 3.2M snpset	HumanOrigins	..	..	..	592285	M	..	..	..	..	..	..	..	..	..	..	PASS	..
HGDP00640.HO	HGDP00640	..	..	2012	PattersonGenetics2012	Modern	0	0	present	..	BedouinA.HO	..	Israel	31	35	1240K pulldown padded to 3.2M snpset	HumanOrigins	..	..	..	591955	M	..	..	..	..	..	..	..	..	..	..	PASS	..
HGDP00641.HO	HGDP00641	..	..	2012	PattersonGenetics2012	Modern	0	0	present	..	BedouinB.HO	..	Israel	31	35	1240K pulldown padded to 3.2M snpset	HumanOrigins	..	..	..	591219	M	..	..	..	..	..	..	..	..	..	..	PASS	..
HGDP00642.HO	HGDP00642	..	..	2012	PattersonGenetics2012	Modern	0	0	present	..	BedouinA.HO	..	Israel	31	35	1240K pulldown padded to 3.2M snpset	HumanOrigins	..	..	..	592426	M	..	..	..	..	..	..	..	..	..	..	PASS	..
HGDP00643.HO	HGDP00643	..	..	2012	PattersonGenetics2012	Modern	0	0	present	..	BedouinB.HO	..	Israel	31	35	1240K pulldown padded to 3.2M snpset	HumanOrigins	..	..	..	592352	F	..	n/a (female)	n/a (female)	..	..	..	..	..	..	..	PASS	..
HGDP00644.HO	HGDP00644	..	..	2012	PattersonGenetics2012	Modern	0	0	present	..	BedouinA.HO	..	Israel	31	35	1240K pulldown padded to 3.2M snpset	HumanOrigins	..	..	..	590866	M	..	..	..	..	..	..	..	..	..	..	PASS	..
HGDP00645.HO	HGDP00645	..	..	2012	PattersonGenetics2012	Modern	0	0	present	..	BedouinA.HO	..	Israel	31	35	1240K pulldown padded to 3.2M snpset	HumanOrigins	..	..	..	592521	M	..	..	..	..	..	..	..	..	..	..	PASS	..
HGDP00646.HO	HGDP00646	..	..	2012	PattersonGenetics2012	Modern	0	0	present	..	BedouinA.HO	..	Israel	31	35	1240K pulldown padded to 3.2M snpset	HumanOrigins	..	..	..	592259	F	..	n/a (female)	n/a (female)	..	..	..	..	..	..	..	PASS	..
HGDP00647.HO	HGDP00647	..	..	2012	PattersonGenetics2012	Modern	0	0	present	..	BedouinA.HO	..	Israel	31	35	1240K pulldown padded to 3.2M snpset	HumanOrigins	..	..	..	591836	F	..	n/a (female)	n/a (female)	..	..	..	..	..	..	..	PASS	..
HGDP00648.HO	HGDP00648	..	..	2012	PattersonGenetics2012	Modern	0	0	present	..	BedouinB.HO	..	Israel	31	35	1240K pulldown padded to 3.2M snpset	HumanOrigins	..	..	..	592610	M	..	..	..	..	..	..	..	..	..	..	PASS	..
HGDP00649.HO	HGDP00649	..	..	2012	PattersonGenetics2012	Modern	0	0	present	..	BedouinB.HO	..	Israel	31	35	1240K pulldown padded to 3.2M snpset	HumanOrigins	..	..	..	591707	F	..	n/a (female)	n/a (female)	..	..	..	..	..	..	..	PASS	..
HGDP00650.HO	HGDP00650	..	..	2012	PattersonGenetics2012	Modern	0	0	present	..	BedouinB.HO	..	Israel	31	35	1240K pulldown padded to 3.2M snpset	HumanOrigins	..	..	..	590938	F	..	n/a (female)	n/a (female)	..	..	..	..	..	..	..	PASS	..
HGDP00651.HO	HGDP00651	..	..	2012	PattersonGenetics2012	Modern	0	0	present	..	BedouinB.HO	..	Israel	31	35	1240K pulldown padded to 3.2M snpset	HumanOrigins	..	..	..	592192	F	..	n/a (female)	n/a (female)	..	..	..	..	..	..	..	PASS	..
HGDP00653.HO	HGDP00653	..	..	2012	PattersonGenetics2012	Modern	0	0	present	..	BedouinB.HO	..	Israel	31	35	1240K pulldown padded to 3.2M snpset	HumanOrigins	..	..	..	589168	F	..	n/a (female)	n/a (female)	..	..	..	..	..	..	..	PASS	..
HGDP00654.HO	HGDP00654	..	..	2012	PattersonGenetics2012	Modern	0	0	present	..	BedouinA.HO	..	Israel	31	35	1240K pulldown padded to 3.2M snpset	HumanOrigins	..	..	..	592555	M	..	..	..	..	..	..	..	..	..	..	PASS	..
HGDP00666.HO	HGDP00666	..	..	2012	PattersonGenetics2012	Modern	0	0	present	..	Sardinian.HO	..	Italy	40	9	1240K pulldown padded to 3.2M snpset	HumanOrigins	..	..	..	591153	M	..	..	..	..	..	..	..	..	..	..	PASS	..
HGDP00667.HO	HGDP00667	..	..	2012	PattersonGenetics2012	Modern	0	0	present	..	Sardinian.HO	..	Italy	40	9	1240K pulldown padded to 3.2M snpset	HumanOrigins	..	..	..	591968	F	..	n/a (female)	n/a (female)	..	..	..	..	..	..	..	PASS	..
HGDP00668.HO	HGDP00668	..	..	2012	PattersonGenetics2012	Modern	0	0	present	..	Sardinian.HO	..	Italy	40	9	1240K pulldown padded to 3.2M snpset	HumanOrigins	..	..	..	592459	M	..	..	..	..	..	..	..	..	..	..	PASS	..
HGDP00669.HO	HGDP00669	..	..	2012	PattersonGenetics2012	Modern	0	0	present	..	Sardinian.HO	..	Italy	40	9	1240K pulldown padded to 3.2M snpset	HumanOrigins	..	..	..	592350	F	..	n/a (female)	n/a (female)	..	..	..	..	..	..	..	PASS	..
HGDP00670.HO	HGDP00670	..	..	2012	PattersonGenetics2012	Modern	0	0	present	..	Sardinian.HO	..	Italy	40	9	1240K pulldown padded to 3.2M snpset	HumanOrigins	..	..	..	591936	M	..	..	..	..	..	..	..	..	..	..	PASS	..
HGDP00671.HO	HGDP00671	..	..	2012	PattersonGenetics2012	Modern	0	0	present	..	Sardinian.HO	..	Italy	40	9	1240K pulldown padded to 3.2M snpset	HumanOrigins	..	..	..	592810	M	..	..	..	..	..	..	..	..	..	..	PASS	..
HGDP00672.HO	HGDP00672	..	..	2012	PattersonGenetics2012	Modern	0	0	present	..	Italian_Sardinian.HO	..	Italy	40	9	1240K pulldown padded to 3.2M snpset	HumanOrigins	..	..	..	591544	F	..	n/a (female)	n/a (female)	..	..	..	..	..	..	..	PASS	..
HGDP00673.HO	HGDP00673	..	..	2012	PattersonGenetics2012	Modern	0	0	present	..	Sardinian.HO	..	Italy	40	9	1240K pulldown padded to 3.2M snpset	HumanOrigins	..	..	..	591782	F	..	n/a (female)	n/a (female)	..	..	..	..	..	..	..	PASS	..
HGDP00674.HO	HGDP00674	..	..	2012	PattersonGenetics2012	Modern	0	0	present	..	Sardinian.HO	..	Italy	40	9	1240K pulldown padded to 3.2M snpset	HumanOrigins	..	..	..	590761	M	..	..	..	..	..	..	..	..	..	..	PASS	..
HGDP00675.HO	HGDP00675	..	..	2012	PattersonGenetics2012	Modern	0	0	present	..	Palestinian.HO	..	Israel	32	35	1240K pulldown padded to 3.2M snpset	HumanOrigins	..	..	..	591549	M	..	..	..	..	..	..	..	..	..	..	PASS	..
HGDP00676.HO	HGDP00676	..	..	2012	PattersonGenetics2012	Modern	0	0	present	..	Palestinian.HO	..	Israel	32	35	1240K pulldown padded to 3.2M snpset	HumanOrigins	..	..	..	588916	M	..	..	..	..	..	..	..	..	..	..	PASS	..
HGDP00677.HO	HGDP00677	..	..	2012	PattersonGenetics2012	Modern	0	0	present	..	Palestinian.HO	..	Israel	32	35	1240K pulldown padded to 3.2M snpset	HumanOrigins	..	..	..	590824	M	..	..	..	..	..	..	..	..	..	..	PASS	..
HGDP00679.HO	HGDP00679	..	..	2012	PattersonGenetics2012	Modern	0	0	present	..	Palestinian.HO	..	Israel	32	35	1240K pulldown padded to 3.2M snpset	HumanOrigins	..	..	..	591930	F	..	n/a (female)	n/a (female)	..	..	..	..	..	..	..	PASS	..
HGDP00680.HO	HGDP00680	..	..	2012	PattersonGenetics2012	Modern	0	0	present	..	Palestinian.HO	..	Israel	32	35	1240K pulldown padded to 3.2M snpset	HumanOrigins	..	..	..	590048	F	..	n/a (female)	n/a (female)	..	..	..	..	..	..	..	PASS	..
HGDP00683.HO	HGDP00683	..	..	2012	PattersonGenetics2012	Modern	0	0	present	..	Palestinian.HO	..	Israel	32	35	1240K pulldown padded to 3.2M snpset	HumanOrigins	..	..	..	592232	F	..	n/a (female)	n/a (female)	..	..	..	..	..	..	..	PASS	..
HGDP00684.HO	HGDP00684	..	..	2012	PattersonGenetics2012	Modern	0	0	present	..	Palestinian.HO	..	Israel	32	35	1240K pulldown padded to 3.2M snpset	HumanOrigins	..	..	..	592373	F	..	n/a (female)	n/a (female)	..	..	..	..	..	..	..	PASS	..
HGDP00685.HO	HGDP00685	..	..	2012	PattersonGenetics2012	Modern	0	0	present	..	Palestinian_oAfrican.HO	..	Israel	32	35	1240K pulldown padded to 3.2M snpset	HumanOrigins	..	..	..	592024	F	..	n/a (female)	n/a (female)	..	..	..	..	..	..	..	PASS	..
HGDP00686.HO	HGDP00686	..	..	2012	PattersonGenetics2012	Modern	0	0	present	..	Palestinian.HO	..	Israel	32	35	1240K pulldown padded to 3.2M snpset	HumanOrigins	..	..	..	592252	F	..	n/a (female)	n/a (female)	..	..	..	..	..	..	..	PASS	..
HGDP00687.HO	HGDP00687	..	..	2012	PattersonGenetics2012	Modern	0	0	present	..	Palestinian_oAfrican.HO	..	Israel	32	35	1240K pulldown padded to 3.2M snpset	HumanOrigins	..	..	..	592078	F	..	n/a (female)	n/a (female)	..	..	..	..	..	..	..	PASS	..
HGDP00688.HO	HGDP00688	..	..	2012	PattersonGenetics2012	Modern	0	0	present	..	Palestinian.HO	..	Israel	32	35	1240K pulldown padded to 3.2M snpset	HumanOrigins	..	..	..	592560	F	..	n/a (female)	n/a (female)	..	..	..	..	..	..	..	PASS	..
HGDP00689.HO	HGDP00689	..	..	2012	PattersonGenetics2012	Modern	0	0	present	..	Palestinian.HO	..	Israel	32	35	1240K pulldown padded to 3.2M snpset	HumanOrigins	..	..	..	592391	F	..	n/a (female)	n/a (female)	..	..	..	..	..	..	..	PASS	..
HGDP00690.HO	HGDP00690	..	..	2012	PattersonGenetics2012	Modern	0	0	present	..	Palestinian.HO	..	Israel	32	35	1240K pulldown padded to 3.2M snpset	HumanOrigins	..	..	..	592016	F	..	n/a (female)	n/a (female)	..	..	..	..	..	..	..	PASS	..
HGDP00691.HO	HGDP00691	..	..	2012	PattersonGenetics2012	Modern	0	0	present	..	Palestinian.HO	..	Israel	32	35	1240K pulldown padded to 3.2M snpset	HumanOrigins	..	..	..	592217	F	..	n/a (female)	n/a (female)	..	..	..	..	..	..	..	PASS	..
HGDP00694.HO	HGDP00694	..	..	2012	PattersonGenetics2012	Modern	0	0	present	..	Palestinian.HO	..	Israel	32	35	1240K pulldown padded to 3.2M snpset	HumanOrigins	..	..	..	592135	F	..	n/a (female)	n/a (female)	..	..	..	..	..	..	..	PASS	..
HGDP00696.HO	HGDP00696	..	..	2012	PattersonGenetics2012	Modern	0	0	present	..	Palestinian.HO	..	Israel	32	35	1240K pulldown padded to 3.2M snpset	HumanOrigins	..	..	..	592250	F	..	n/a (female)	n/a (female)	..	..	..	..	..	..	..	PASS	..
HGDP00697.HO	HGDP00697	..	..	2012	PattersonGenetics2012	Modern	0	0	present	..	Palestinian.HO	..	Israel	32	35	1240K pulldown padded to 3.2M snpset	HumanOrigins	..	..	..	591801	F	..	n/a (female)	n/a (female)	..	..	..	..	..	..	..	PASS	..
HGDP00698.HO	HGDP00698	..	..	2012	PattersonGenetics2012	Modern	0	0	present	..	Palestinian.HO	..	Israel	32	35	1240K pulldown padded to 3.2M snpset	HumanOrigins	..	..	..	592414	F	..	n/a (female)	n/a (female)	..	..	..	..	..	..	..	PASS	..
HGDP00699.HO	HGDP00699	..	..	2012	PattersonGenetics2012	Modern	0	0	present	..	Palestinian.HO	..	Israel	32	35	1240K pulldown padded to 3.2M snpset	HumanOrigins	..	..	..	592739	F	..	n/a (female)	n/a (female)	..	..	..	..	..	..	..	PASS	..
HGDP00700.HO	HGDP00700	..	..	2012	PattersonGenetics2012	Modern	0	0	present	..	Palestinian.HO	..	Israel	32	35	1240K pulldown padded to 3.2M snpset	HumanOrigins	..	..	..	590967	F	..	n/a (female)	n/a (female)	..	..	..	..	..	..	..	PASS	..
HGDP00701.HO	HGDP00701	..	..	2012	PattersonGenetics2012	Modern	0	0	present	..	BedouinB.HO	..	Israel	31	35	1240K pulldown padded to 3.2M snpset	HumanOrigins	..	..	..	588396	F	..	n/a (female)	n/a (female)	..	..	..	..	..	..	..	PASS	..
HGDP00722.HO	HGDP00722	..	..	2012	PattersonGenetics2012	Modern	0	0	present	..	Palestinian.HO	..	Israel	32	35	1240K pulldown padded to 3.2M snpset	HumanOrigins	..	..	..	592289	M	..	..	..	..	..	..	..	..	..	..	PASS	..
HGDP00724.HO	HGDP00724	..	..	2012	PattersonGenetics2012	Modern	0	0	present	..	Palestinian.HO	..	Israel	32	35	1240K pulldown padded to 3.2M snpset	HumanOrigins	..	..	..	592380	M	..	..	..	..	..	..	..	..	..	..	PASS	..
HGDP00725.HO	HGDP00725	..	..	2012	PattersonGenetics2012	Modern	0	0	present	..	Palestinian.HO	..	Israel	32	35	1240K pulldown padded to 3.2M snpset	HumanOrigins	..	..	..	592514	M	..	..	..	..	..	..	..	..	..	..	PASS	..
HGDP00726.HO	HGDP00726	..	..	2012	PattersonGenetics2012	Modern	0	0	present	..	Palestinian.HO	..	Israel	32	35	1240K pulldown padded to 3.2M snpset	HumanOrigins	..	..	..	592487	M	..	..	..	..	..	..	..	..	..	..	PASS	..
HGDP00727.HO	HGDP00727	..	..	2012	PattersonGenetics2012	Modern	0	0	present	..	Palestinian.HO	..	Israel	32	35	1240K pulldown padded to 3.2M snpset	HumanOrigins	..	..	..	592133	M	..	..	..	..	..	..	..	..	..	..	PASS	..
HGDP00729.HO	HGDP00729	..	..	2012	PattersonGenetics2012	Modern	0	0	present	..	Palestinian.HO	..	Israel	32	35	1240K pulldown padded to 3.2M snpset	HumanOrigins	..	..	..	592580	M	..	..	..	..	..	..	..	..	..	..	PASS	..
HGDP00730.HO	HGDP00730	..	..	2012	PattersonGenetics2012	Modern	0	0	present	..	Palestinian.HO	..	Israel	32	35	1240K pulldown padded to 3.2M snpset	HumanOrigins	..	..	..	592104	M	..	..	..	..	..	..	..	..	..	..	PASS	..
HGDP00731.HO	HGDP00731	..	..	2012	PattersonGenetics2012	Modern	0	0	present	..	Palestinian_oAfrican.HO	..	Israel	32	35	1240K pulldown padded to 3.2M snpset	HumanOrigins	..	..	..	592628	M	..	..	..	..	..	..	..	..	..	..	PASS	..
HGDP00732.HO	HGDP00732	..	..	2012	PattersonGenetics2012	Modern	0	0	present	..	Palestinian.HO	..	Israel	32	35	1240K pulldown padded to 3.2M snpset	HumanOrigins	..	..	..	592285	M	..	..	..	..	..	..	..	..	..	..	PASS	..
HGDP00733.HO	HGDP00733	..	..	2012	PattersonGenetics2012	Modern	0	0	present	..	Palestinian.HO	..	Israel	32	35	1240K pulldown padded to 3.2M snpset	HumanOrigins	..	..	..	592387	M	..	..	..	..	..	..	..	..	..	..	PASS	..
HGDP00734.HO	HGDP00734	..	..	2012	PattersonGenetics2012	Modern	0	0	present	..	Palestinian.HO	..	Israel	32	35	1240K pulldown padded to 3.2M snpset	HumanOrigins	..	..	..	592246	M	..	..	..	..	..	..	..	..	..	..	PASS	..
HGDP00735.HO	HGDP00735	..	..	2012	PattersonGenetics2012	Modern	0	0	present	..	Palestinian.HO	..	Israel	32	35	1240K pulldown padded to 3.2M snpset	HumanOrigins	..	..	..	592365	F	..	n/a (female)	n/a (female)	..	..	..	..	..	..	..	PASS	..
HGDP00736.HO	HGDP00736	..	..	2012	PattersonGenetics2012	Modern	0	0	present	..	Palestinian.HO	..	Israel	32	35	1240K pulldown padded to 3.2M snpset	HumanOrigins	..	..	..	592189	F	..	n/a (female)	n/a (female)	..	..	..	..	..	..	..	PASS	..
HGDP00737.HO	HGDP00737	..	..	2012	PattersonGenetics2012	Modern	0	0	present	..	Palestinian.HO	..	Israel	32	35	1240K pulldown padded to 3.2M snpset	HumanOrigins	..	..	..	592224	F	..	n/a (female)	n/a (female)	..	..	..	..	..	..	..	PASS	..
HGDP00739.HO	HGDP00739	..	..	2012	PattersonGenetics2012	Modern	0	0	present	..	Palestinian.HO	..	Israel	32	35	1240K pulldown padded to 3.2M snpset	HumanOrigins	..	..	..	592591	F	..	n/a (female)	n/a (female)	..	..	..	..	..	..	..	PASS	..
HGDP00740.HO	HGDP00740	..	..	2012	PattersonGenetics2012	Modern	0	0	present	..	Palestinian.HO	..	Israel	32	35	1240K pulldown padded to 3.2M snpset	HumanOrigins	..	..	..	592280	F	..	n/a (female)	n/a (female)	..	..	..	..	..	..	..	PASS	..
HGDP00745.HO	HGDP00745	..	..	2012	PattersonGenetics2012	Modern	0	0	present	..	Palestinian.HO	..	Israel	32	35	1240K pulldown padded to 3.2M snpset	HumanOrigins	..	..	..	592251	F	..	n/a (female)	n/a (female)	..	..	..	..	..	..	..	PASS	..
HGDP00794.HO	HGDP00794	..	..	2012	PattersonGenetics2012	Modern	0	0	present	..	Orcadian.HO	Orkney Islands	United Kingdom	59	-3	1240K pulldown padded to 3.2M snpset	HumanOrigins	..	..	..	591604	F	..	n/a (female)	n/a (female)	..	..	..	..	..	..	..	PASS	..
HGDP00796.HO	HGDP00796	..	..	2012	PattersonGenetics2012	Modern	0	0	present	..	Orcadian.HO	Orkney Islands	United Kingdom	59	-3	1240K pulldown padded to 3.2M snpset	HumanOrigins	..	..	..	589225	F	..	n/a (female)	n/a (female)	..	..	..	..	..	..	..	PASS	..
HGDP00797.HO	HGDP00797	..	..	2012	PattersonGenetics2012	Modern	0	0	present	..	Orcadian.HO	Orkney Islands	United Kingdom	59	-3	1240K pulldown padded to 3.2M snpset	HumanOrigins	..	..	..	591845	F	..	n/a (female)	n/a (female)	..	..	..	..	..	..	..	PASS	..
HGDP00798.HO	HGDP00798	..	..	2012	PattersonGenetics2012	Modern	0	0	present	..	Orcadian.HO	Orkney Islands	United Kingdom	59	-3	1240K pulldown padded to 3.2M snpset	HumanOrigins	..	..	..	591878	M	..	..	..	..	..	..	..	..	..	..	PASS	..
HGDP00799.HO	HGDP00799	..	..	2012	PattersonGenetics2012	Modern	0	0	present	..	Orcadian.HO	Orkney Islands	United Kingdom	59	-3	1240K pulldown padded to 3.2M snpset	HumanOrigins	..	..	..	589561	F	..	n/a (female)	n/a (female)	..	..	..	..	..	..	..	PASS	..
HGDP00800.HO	HGDP00800	..	..	2012	PattersonGenetics2012	Modern	0	0	present	..	Orcadian.HO	Orkney Islands	United Kingdom	59	-3	1240K pulldown padded to 3.2M snpset	HumanOrigins	..	..	..	591754	F	..	n/a (female)	n/a (female)	..	..	..	..	..	..	..	PASS	..
HGDP00802.HO	HGDP00802	..	..	2012	PattersonGenetics2012	Modern	0	0	present	..	Orcadian.HO	Orkney Islands	United Kingdom	59	-3	1240K pulldown padded to 3.2M snpset	HumanOrigins	..	..	..	590818	F	..	n/a (female)	n/a (female)	..	..	..	..	..	..	..	PASS	..
HGDP00803.HO	HGDP00803	..	..	2012	PattersonGenetics2012	Modern	0	0	present	..	Orcadian.HO	Orkney Islands	United Kingdom	59	-3	1240K pulldown padded to 3.2M snpset	HumanOrigins	..	..	..	590434	M	..	..	..	..	..	..	..	..	..	..	PASS	..
HGDP00805.HO	HGDP00805	..	..	2012	PattersonGenetics2012	Modern	0	0	present	..	Orcadian.HO	Orkney Islands	United Kingdom	59	-3	1240K pulldown padded to 3.2M snpset	HumanOrigins	..	..	..	592039	F	..	n/a (female)	n/a (female)	..	..	..	..	..	..	..	PASS	..
HGDP00806.HO	HGDP00806	..	..	2012	PattersonGenetics2012	Modern	0	0	present	..	Orcadian.HO	Orkney Islands	United Kingdom	59	-3	1240K pulldown padded to 3.2M snpset	HumanOrigins	..	..	..	592474	F	..	n/a (female)	n/a (female)	..	..	..	..	..	..	..	PASS	..
HGDP00807.HO	HGDP00807	..	..	2012	PattersonGenetics2012	Modern	0	0	present	..	Orcadian.HO	Orkney Islands	United Kingdom	59	-3	1240K pulldown padded to 3.2M snpset	HumanOrigins	..	..	..	592631	M	..	..	..	..	..	..	..	..	..	..	PASS	..
HGDP00808.HO	HGDP00808	..	..	2012	PattersonGenetics2012	Modern	0	0	present	..	Orcadian.HO	Orkney Islands	United Kingdom	59	-3	1240K pulldown padded to 3.2M snpset	HumanOrigins	..	..	..	592437	M	..	..	..	..	..	..	..	..	..	..	PASS	..
HGDP00810.HO	HGDP00810	..	..	2012	PattersonGenetics2012	Modern	0	0	present	..	Orcadian.HO	Orkney Islands	United Kingdom	59	-3	1240K pulldown padded to 3.2M snpset	HumanOrigins	..	..	..	591308	M	..	..	..	..	..	..	..	..	..	..	PASS	..
HGDP00879.HO	HGDP00879	..	..	2012	PattersonGenetics2012	Modern	0	0	present	..	Russian.HO	Vologda Administrative Region	Russia	61	40	1240K pulldown padded to 3.2M snpset	HumanOrigins	..	..	..	592620	M	..	..	..	..	..	..	..	..	..	..	PASS	..
HGDP00880.HO	HGDP00880	..	..	2012	PattersonGenetics2012	Modern	0	0	present	..	Russian.HO	Vologda Administrative Region	Russia	61	40	1240K pulldown padded to 3.2M snpset	HumanOrigins	..	..	..	592730	M	..	..	..	..	..	..	..	..	..	..	PASS	..
HGDP00882.HO	HGDP00882	..	..	2012	PattersonGenetics2012	Modern	0	0	present	..	Russian.HO	Vologda Administrative Region	Russia	61	40	1240K pulldown padded to 3.2M snpset	HumanOrigins	..	..	..	591116	M	..	..	..	..	..	..	..	..	..	..	PASS	..
HGDP00883.HO	HGDP00883	..	..	2012	PattersonGenetics2012	Modern	0	0	present	..	Russian.HO	Vologda Administrative Region	Russia	61	40	1240K pulldown padded to 3.2M snpset	HumanOrigins	..	..	..	592577	M	..	..	..	..	..	..	..	..	..	..	PASS	..
HGDP00884.HO	HGDP00884	..	..	2012	PattersonGenetics2012	Modern	0	0	present	..	Russian.HO	Vologda Administrative Region	Russia	61	40	1240K pulldown padded to 3.2M snpset	HumanOrigins	..	..	..	591946	F	..	n/a (female)	n/a (female)	..	..	..	..	..	..	..	PASS	..
HGDP00887.HO	HGDP00887	..	..	2012	PattersonGenetics2012	Modern	0	0	present	..	Russian.HO	Vologda Administrative Region	Russia	61	40	1240K pulldown padded to 3.2M snpset	HumanOrigins	..	..	..	582993	M	..	..	..	..	..	..	..	..	..	..	PASS	..
HGDP00888.HO	HGDP00888	..	..	2012	PattersonGenetics2012	Modern	0	0	present	..	Russian.HO	Vologda Administrative Region	Russia	61	40	1240K pulldown padded to 3.2M snpset	HumanOrigins	..	..	..	591272	M	..	..	..	..	..	..	..	..	..	..	PASS	..
HGDP00889.HO	HGDP00889	..	..	2012	PattersonGenetics2012	Modern	0	0	present	..	Russian.HO	Vologda Administrative Region	Russia	61	40	1240K pulldown padded to 3.2M snpset	HumanOrigins	..	..	..	592072	F	..	n/a (female)	n/a (female)	..	..	..	..	..	..	..	PASS	..
HGDP00890.HO	HGDP00890	..	..	2012	PattersonGenetics2012	Modern	0	0	present	..	Russian.HO	Vologda Administrative Region	Russia	61	40	1240K pulldown padded to 3.2M snpset	HumanOrigins	..	..	..	591293	M	..	..	..	..	..	..	..	..	..	..	PASS	..
HGDP00891.HO	HGDP00891	..	..	2012	PattersonGenetics2012	Modern	0	0	present	..	Russian.HO	Vologda Administrative Region	Russia	61	40	1240K pulldown padded to 3.2M snpset	HumanOrigins	..	..	..	592355	M	..	..	..	..	..	..	..	..	..	..	PASS	..
HGDP00892.HO	HGDP00892	..	..	2012	PattersonGenetics2012	Modern	0	0	present	..	Russian.HO	Vologda Administrative Region	Russia	61	40	1240K pulldown padded to 3.2M snpset	HumanOrigins	..	..	..	592556	M	..	..	..	..	..	..	..	..	..	..	PASS	..
HGDP00893.HO	HGDP00893	..	..	2012	PattersonGenetics2012	Modern	0	0	present	..	Russian.HO	Vologda Administrative Region	Russia	61	40	1240K pulldown padded to 3.2M snpset	HumanOrigins	..	..	..	592456	M	..	..	..	..	..	..	..	..	..	..	PASS	..
HGDP00894.HO	HGDP00894	..	..	2012	PattersonGenetics2012	Modern	0	0	present	..	Russian.HO	Vologda Administrative Region	Russia	61	40	1240K pulldown padded to 3.2M snpset	HumanOrigins	..	..	..	591193	M	..	..	..	..	..	..	..	..	..	..	PASS	..
HGDP00895.HO	HGDP00895	..	..	2012	PattersonGenetics2012	Modern	0	0	present	..	Russian.HO	Vologda Administrative Region	Russia	61	40	1240K pulldown padded to 3.2M snpset	HumanOrigins	..	..	..	584783	M	..	..	..	..	..	..	..	..	..	..	PASS	..
HGDP00896.HO	HGDP00896	..	..	2012	PattersonGenetics2012	Modern	0	0	present	..	Russian.HO	Vologda Administrative Region	Russia	61	40	1240K pulldown padded to 3.2M snpset	HumanOrigins	..	..	..	592648	M	..	..	..	..	..	..	..	..	..	..	PASS	..
HGDP00897.HO	HGDP00897	..	..	2012	PattersonGenetics2012	Modern	0	0	present	..	Russian.HO	Vologda Administrative Region	Russia	61	40	1240K pulldown padded to 3.2M snpset	HumanOrigins	..	..	..	592062	M	..	..	..	..	..	..	..	..	..	..	PASS	..
HGDP00898.HO	HGDP00898	..	..	2012	PattersonGenetics2012	Modern	0	0	present	..	Russian.HO	Vologda Administrative Region	Russia	61	40	1240K pulldown padded to 3.2M snpset	HumanOrigins	..	..	..	592782	F	..	n/a (female)	n/a (female)	..	..	..	..	..	..	..	PASS	..
HGDP00899.HO	HGDP00899	..	..	2012	PattersonGenetics2012	Modern	0	0	present	..	Russian.HO	Vologda Administrative Region	Russia	61	40	1240K pulldown padded to 3.2M snpset	HumanOrigins	..	..	..	592121	F	..	n/a (female)	n/a (female)	..	..	..	..	..	..	..	PASS	..
HGDP00900.HO	HGDP00900	..	..	2012	PattersonGenetics2012	Modern	0	0	present	..	Russian.HO	Vologda Administrative Region	Russia	61	40	1240K pulldown padded to 3.2M snpset	HumanOrigins	..	..	..	591365	M	..	..	..	..	..	..	..	..	..	..	PASS	..
HGDP00901.HO	HGDP00901	..	..	2012	PattersonGenetics2012	Modern	0	0	present	..	Russian.HO	Vologda Administrative Region	Russia	61	40	1240K pulldown padded to 3.2M snpset	HumanOrigins	..	..	..	592740	F	..	n/a (female)	n/a (female)	..	..	..	..	..	..	..	PASS	..
HGDP00902.HO	HGDP00902	..	..	2012	PattersonGenetics2012	Modern	0	0	present	..	Russian.HO	Vologda Administrative Region	Russia	61	40	1240K pulldown padded to 3.2M snpset	HumanOrigins	..	..	..	592483	F	..	n/a (female)	n/a (female)	..	..	..	..	..	..	..	PASS	..
HGDP00903.HO	HGDP00903	..	..	2012	PattersonGenetics2012	Modern	0	0	present	..	Russian.HO	Vologda Administrative Region	Russia	61	40	1240K pulldown padded to 3.2M snpset	HumanOrigins	..	..	..	591676	F	..	n/a (female)	n/a (female)	..	..	..	..	..	..	..	PASS	..
HGDP01062.HO	HGDP01062	..	..	2012	PattersonGenetics2012	Modern	0	0	present	..	Italian_Sardinian.HO	..	Italy	40	9	1240K pulldown padded to 3.2M snpset	HumanOrigins	..	..	..	592433	F	..	n/a (female)	n/a (female)	..	..	..	..	..	..	..	PASS	..
HGDP01063.HO	HGDP01063	..	..	2012	PattersonGenetics2012	Modern	0	0	present	..	Sardinian.HO	..	Italy	40	9	1240K pulldown padded to 3.2M snpset	HumanOrigins	..	..	..	592509	M	..	..	..	..	..	..	..	..	..	..	PASS	..
HGDP01064.HO	HGDP01064	..	..	2012	PattersonGenetics2012	Modern	0	0	present	..	Sardinian.HO	..	Italy	40	9	1240K pulldown padded to 3.2M snpset	HumanOrigins	..	..	..	591421	F	..	n/a (female)	n/a (female)	..	..	..	..	..	..	..	PASS	..
HGDP01065.HO	HGDP01065	..	..	2012	PattersonGenetics2012	Modern	0	0	present	..	Sardinian.HO	..	Italy	40	9	1240K pulldown padded to 3.2M snpset	HumanOrigins	..	..	..	592700	F	..	n/a (female)	n/a (female)	..	..	..	..	..	..	..	PASS	..
HGDP01066.HO	HGDP01066	..	..	2012	PattersonGenetics2012	Modern	0	0	present	..	Sardinian.HO	..	Italy	40	9	1240K pulldown padded to 3.2M snpset	HumanOrigins	..	..	..	592802	M	..	..	..	..	..	..	..	..	..	..	PASS	..
HGDP01067.HO	HGDP01067	..	..	2012	PattersonGenetics2012	Modern	0	0	present	..	Sardinian.HO	..	Italy	40	9	1240K pulldown padded to 3.2M snpset	HumanOrigins	..	..	..	590020	M	..	..	..	..	..	..	..	..	..	..	PASS	..
HGDP01068.HO	HGDP01068	..	..	2012	PattersonGenetics2012	Modern	0	0	present	..	Sardinian.HO	..	Italy	40	9	1240K pulldown padded to 3.2M snpset	HumanOrigins	..	..	..	591475	F	..	n/a (female)	n/a (female)	..	..	..	..	..	..	..	PASS	..
HGDP01069.HO	HGDP01069	..	..	2012	PattersonGenetics2012	Modern	0	0	present	..	Sardinian.HO	..	Italy	40	9	1240K pulldown padded to 3.2M snpset	HumanOrigins	..	..	..	592033	M	..	..	..	..	..	..	..	..	..	..	PASS	..
HGDP01070.HO	HGDP01070	..	..	2012	PattersonGenetics2012	Modern	0	0	present	..	Sardinian.HO	..	Italy	40	9	1240K pulldown padded to 3.2M snpset	HumanOrigins	..	..	..	591729	F	..	n/a (female)	n/a (female)	..	..	..	..	..	..	..	PASS	..
HGDP01071.HO	HGDP01071	..	..	2012	PattersonGenetics2012	Modern	0	0	present	..	Sardinian.HO	..	Italy	40	9	1240K pulldown padded to 3.2M snpset	HumanOrigins	..	..	..	589836	M	..	..	..	..	..	..	..	..	..	..	PASS	..
HGDP01072.HO	HGDP01072	..	..	2012	PattersonGenetics2012	Modern	0	0	present	..	Sardinian.HO	..	Italy	40	9	1240K pulldown padded to 3.2M snpset	HumanOrigins	..	..	..	591376	F	..	n/a (female)	n/a (female)	..	..	..	..	..	..	..	PASS	..
HGDP01073.HO	HGDP01073	..	..	2012	PattersonGenetics2012	Modern	0	0	present	..	Sardinian.HO	..	Italy	40	9	1240K pulldown padded to 3.2M snpset	HumanOrigins	..	..	..	592702	M	..	..	..	..	..	..	..	..	..	..	PASS	..
HGDP01074.HO	HGDP01074	..	..	2012	PattersonGenetics2012	Modern	0	0	present	..	Sardinian.HO	..	Italy	40	9	1240K pulldown padded to 3.2M snpset	HumanOrigins	..	..	..	591218	F	..	n/a (female)	n/a (female)	..	..	..	..	..	..	..	PASS	..
HGDP01075.HO	HGDP01075	..	..	2012	PattersonGenetics2012	Modern	0	0	present	..	Sardinian.HO	..	Italy	40	9	1240K pulldown padded to 3.2M snpset	HumanOrigins	..	..	..	592223	M	..	..	..	..	..	..	..	..	..	..	PASS	..
HGDP01076.HO	HGDP01076	..	..	2012	PattersonGenetics2012	Modern	0	0	present	..	Sardinian.HO	..	Italy	40	9	1240K pulldown padded to 3.2M snpset	HumanOrigins	..	..	..	588246	M	..	..	..	..	..	..	..	..	..	..	PASS	..
HGDP01077.HO	HGDP01077	..	..	2012	PattersonGenetics2012	Modern	0	0	present	..	Sardinian.HO	..	Italy	40	9	1240K pulldown padded to 3.2M snpset	HumanOrigins	..	..	..	592739	M	..	..	..	..	..	..	..	..	..	..	PASS	..
HGDP01078.HO	HGDP01078	..	..	2012	PattersonGenetics2012	Modern	0	0	present	..	Sardinian.HO	..	Italy	40	9	1240K pulldown padded to 3.2M snpset	HumanOrigins	..	..	..	588921	F	..	n/a (female)	n/a (female)	..	..	..	..	..	..	..	PASS	..
HGDP01079.HO	HGDP01079	..	..	2012	PattersonGenetics2012	Modern	0	0	present	..	Sardinian.HO	..	Italy	40	9	1240K pulldown padded to 3.2M snpset	HumanOrigins	..	..	..	592770	M	..	..	..	..	..	..	..	..	..	..	PASS	..
HGDP01147.HO	HGDP01147	..	..	2012	PattersonGenetics2012	Modern	0	0	present	..	Italian_North.HO	..	Italy	46	10	1240K pulldown padded to 3.2M snpset	HumanOrigins	..	..	..	592427	M	..	..	..	..	..	..	..	..	..	..	PASS	..
HGDP01151.HO	HGDP01151	..	..	2012	PattersonGenetics2012	Modern	0	0	present	..	Italian_North.HO	..	Italy	46	10	1240K pulldown padded to 3.2M snpset	HumanOrigins	..	..	..	591757	M	..	..	..	..	..	..	..	..	..	..	PASS	..
HGDP01152.HO	HGDP01152	..	..	2012	PattersonGenetics2012	Modern	0	0	present	..	Italian_North.HO	..	Italy	46	10	1240K pulldown padded to 3.2M snpset	HumanOrigins	..	..	..	588367	M	..	..	..	..	..	..	..	..	..	..	PASS	..
HGDP01153.HO	HGDP01153	..	..	2012	PattersonGenetics2012	Modern	0	0	present	..	Italian_North.HO	..	Italy	46	10	1240K pulldown padded to 3.2M snpset	HumanOrigins	..	..	..	592608	M	..	..	..	..	..	..	..	..	..	..	PASS	..
HGDP01155.HO	HGDP01155	..	..	2012	PattersonGenetics2012	Modern	0	0	present	..	Italian_North.HO	..	Italy	46	10	1240K pulldown padded to 3.2M snpset	HumanOrigins	..	..	..	592290	M	..	..	..	..	..	..	..	..	..	..	PASS	..
HGDP01156.HO	HGDP01156	..	..	2012	PattersonGenetics2012	Modern	0	0	present	..	Italian_North.HO	..	Italy	46	10	1240K pulldown padded to 3.2M snpset	HumanOrigins	..	..	..	592556	F	..	n/a (female)	n/a (female)	..	..	..	..	..	..	..	PASS	..
HGDP01157.HO	HGDP01157	..	..	2012	PattersonGenetics2012	Modern	0	0	present	..	Italian_North.HO	..	Italy	46	10	1240K pulldown padded to 3.2M snpset	HumanOrigins	..	..	..	592113	U	..	..	..	..	..	..	..	..	..	..	PASS	..
HGDP01161.HO	HGDP01161	..	..	2012	PattersonGenetics2012	Modern	0	0	present	..	Italian_North.HO	..	Italy	43	11	1240K pulldown padded to 3.2M snpset	HumanOrigins	..	..	..	592067	M	..	..	..	..	..	..	..	..	..	..	PASS	..
HGDP01162.HO	HGDP01162	..	..	2012	PattersonGenetics2012	Modern	0	0	present	..	Italian_North.HO	..	Italy	43	11	1240K pulldown padded to 3.2M snpset	HumanOrigins	..	..	..	592624	M	..	..	..	..	..	..	..	..	..	..	PASS	..
HGDP01163.HO	HGDP01163	..	..	2012	PattersonGenetics2012	Modern	0	0	present	..	Italian_North.HO	..	Italy	43	11	1240K pulldown padded to 3.2M snpset	HumanOrigins	..	..	..	592381	M	..	..	..	..	..	..	..	..	..	..	PASS	..
HGDP01164.HO	HGDP01164	..	..	2012	PattersonGenetics2012	Modern	0	0	present	..	Italian_North.HO	..	Italy	43	11	1240K pulldown padded to 3.2M snpset	HumanOrigins	..	..	..	591806	M	..	..	..	..	..	..	..	..	..	..	PASS	..
HGDP01166.HO	HGDP01166	..	..	2012	PattersonGenetics2012	Modern	0	0	present	..	Italian_North.HO	..	Italy	43	11	1240K pulldown padded to 3.2M snpset	HumanOrigins	..	..	..	592265	M	..	..	..	..	..	..	..	..	..	..	PASS	..
HGDP01167.HO	HGDP01167	..	..	2012	PattersonGenetics2012	Modern	0	0	present	..	Italian_North.HO	..	Italy	43	11	1240K pulldown padded to 3.2M snpset	HumanOrigins	..	..	..	592694	M	..	..	..	..	..	..	..	..	..	..	PASS	..
HGDP01168.HO	HGDP01168	..	..	2012	PattersonGenetics2012	Modern	0	0	present	..	Italian_North.HO	..	Italy	43	11	1240K pulldown padded to 3.2M snpset	HumanOrigins	..	..	..	592645	F	..	n/a (female)	n/a (female)	..	..	..	..	..	..	..	PASS	..
HGDP01169.HO	HGDP01169	..	..	2012	PattersonGenetics2012	Modern	0	0	present	..	Italian_North.HO	..	Italy	43	11	1240K pulldown padded to 3.2M snpset	HumanOrigins	..	..	..	591933	F	..	n/a (female)	n/a (female)	..	..	..	..	..	..	..	PASS	..
HGDP01171.HO	HGDP01171	..	..	2012	PattersonGenetics2012	Modern	0	0	present	..	Italian_North.HO	..	Italy	46	10	1240K pulldown padded to 3.2M snpset	HumanOrigins	..	..	..	592524	F	..	n/a (female)	n/a (female)	..	..	..	..	..	..	..	PASS	..
HGDP01172.HO	HGDP01172	..	..	2012	PattersonGenetics2012	Modern	0	0	present	..	Italian_North.HO	..	Italy	46	10	1240K pulldown padded to 3.2M snpset	HumanOrigins	..	..	..	591351	F	..	n/a (female)	n/a (female)	..	..	..	..	..	..	..	PASS	..
HGDP01173.HO	HGDP01173	..	..	2012	PattersonGenetics2012	Modern	0	0	present	..	Italian_North.HO	..	Italy	46	10	1240K pulldown padded to 3.2M snpset	HumanOrigins	..	..	..	592146	M	..	..	..	..	..	..	..	..	..	..	PASS	..
HGDP01174.HO	HGDP01174	..	..	2012	PattersonGenetics2012	Modern	0	0	present	..	Italian_North.HO	..	Italy	46	10	1240K pulldown padded to 3.2M snpset	HumanOrigins	..	..	..	591921	M	..	..	..	..	..	..	..	..	..	..	PASS	..
HGDP01177.HO	HGDP01177	..	..	2012	PattersonGenetics2012	Modern	0	0	present	..	Italian_North.HO	..	Italy	46	10	1240K pulldown padded to 3.2M snpset	HumanOrigins	..	..	..	592720	F	..	n/a (female)	n/a (female)	..	..	..	..	..	..	..	PASS	..
HGDP01357.HO	HGDP01357	..	..	2012	PattersonGenetics2012	Modern	0	0	present	..	Basque.HO	..	France	43	0	1240K pulldown padded to 3.2M snpset	HumanOrigins	..	..	..	592741	M	..	..	..	..	..	..	..	..	..	..	PASS	..
HGDP01358.HO	HGDP01358	..	..	2012	PattersonGenetics2012	Modern	0	0	present	..	Basque.HO	..	France	43	0	1240K pulldown padded to 3.2M snpset	HumanOrigins	..	..	..	591385	M	..	..	..	..	..	..	..	..	..	..	PASS	..
HGDP01359.HO	HGDP01359	..	..	2012	PattersonGenetics2012	Modern	0	0	present	..	Basque.HO	..	France	43	0	1240K pulldown padded to 3.2M snpset	HumanOrigins	..	..	..	587822	M	..	..	..	..	..	..	..	..	..	..	PASS	..
HGDP01360.HO	HGDP01360	..	..	2012	PattersonGenetics2012	Modern	0	0	present	..	Basque.HO	..	France	43	0	1240K pulldown padded to 3.2M snpset	HumanOrigins	..	..	..	591483	M	..	..	..	..	..	..	..	..	..	..	PASS	..
HGDP01362.HO	HGDP01362	..	..	2012	PattersonGenetics2012	Modern	0	0	present	..	Basque.HO	..	France	43	0	1240K pulldown padded to 3.2M snpset	HumanOrigins	..	..	..	592667	M	..	..	..	..	..	..	..	..	..	..	PASS	..
HGDP01363.HO	HGDP01363	..	..	2012	PattersonGenetics2012	Modern	0	0	present	..	Basque.HO	..	France	43	0	1240K pulldown padded to 3.2M snpset	HumanOrigins	..	..	..	591299	F	..	n/a (female)	n/a (female)	..	..	..	..	..	..	..	PASS	..
HGDP01364.HO	HGDP01364	..	..	2012	PattersonGenetics2012	Modern	0	0	present	..	Basque.HO	..	France	43	0	1240K pulldown padded to 3.2M snpset	HumanOrigins	..	..	..	590938	M	..	..	..	..	..	..	..	..	..	..	PASS	..
HGDP01365.HO	HGDP01365	..	..	2012	PattersonGenetics2012	Modern	0	0	present	..	Basque.HO	..	France	43	0	1240K pulldown padded to 3.2M snpset	HumanOrigins	..	..	..	591122	F	..	n/a (female)	n/a (female)	..	..	..	..	..	..	..	PASS	..
HGDP01366.HO	HGDP01366	..	..	2012	PattersonGenetics2012	Modern	0	0	present	..	Basque.HO	..	France	43	0	1240K pulldown padded to 3.2M snpset	HumanOrigins	..	..	..	591425	F	..	n/a (female)	n/a (female)	..	..	..	..	..	..	..	PASS	..
HGDP01367.HO	HGDP01367	..	..	2012	PattersonGenetics2012	Modern	0	0	present	..	Basque.HO	..	France	43	0	1240K pulldown padded to 3.2M snpset	HumanOrigins	..	..	..	592328	F	..	n/a (female)	n/a (female)	..	..	..	..	..	..	..	PASS	..
HGDP01368.HO	HGDP01368	..	..	2012	PattersonGenetics2012	Modern	0	0	present	..	Basque.HO	..	France	43	0	1240K pulldown padded to 3.2M snpset	HumanOrigins	..	..	..	592294	U	..	..	..	..	..	..	..	..	..	..	PASS	..
HGDP01370.HO	HGDP01370	..	..	2012	PattersonGenetics2012	Modern	0	0	present	..	Basque.HO	..	France	43	0	1240K pulldown padded to 3.2M snpset	HumanOrigins	..	..	..	590848	M	..	..	..	..	..	..	..	..	..	..	PASS	..
HGDP01371.HO	HGDP01371	..	..	2012	PattersonGenetics2012	Modern	0	0	present	..	Basque.HO	..	France	43	0	1240K pulldown padded to 3.2M snpset	HumanOrigins	..	..	..	588706	M	..	..	..	..	..	..	..	..	..	..	PASS	..
HGDP01373.HO	HGDP01373	..	..	2012	PattersonGenetics2012	Modern	0	0	present	..	Basque.HO	..	France	43	0	1240K pulldown padded to 3.2M snpset	HumanOrigins	..	..	..	587210	F	..	n/a (female)	n/a (female)	..	..	..	..	..	..	..	PASS	..
HGDP01374.HO	HGDP01374	..	..	2012	PattersonGenetics2012	Modern	0	0	present	..	Basque.HO	..	France	43	0	1240K pulldown padded to 3.2M snpset	HumanOrigins	..	..	..	591822	M	..	..	..	..	..	..	..	..	..	..	PASS	..
HGDP01375.HO	HGDP01375	..	..	2012	PattersonGenetics2012	Modern	0	0	present	..	Basque.HO	..	France	43	0	1240K pulldown padded to 3.2M snpset	HumanOrigins	..	..	..	592081	M	..	..	..	..	..	..	..	..	..	..	PASS	..
HGDP01377.HO	HGDP01377	..	..	2012	PattersonGenetics2012	Modern	0	0	present	..	Basque.HO	..	France	43	0	1240K pulldown padded to 3.2M snpset	HumanOrigins	..	..	..	589606	M	..	..	..	..	..	..	..	..	..	..	PASS	..
HGDP01378.HO	HGDP01378	..	..	2012	PattersonGenetics2012	Modern	0	0	present	..	Basque.HO	..	France	43	0	1240K pulldown padded to 3.2M snpset	HumanOrigins	..	..	..	592183	M	..	..	..	..	..	..	..	..	..	..	PASS	..
HGDP01379.HO	HGDP01379	..	..	2012	PattersonGenetics2012	Modern	0	0	present	..	Basque.HO	..	France	43	0	1240K pulldown padded to 3.2M snpset	HumanOrigins	..	..	..	586641	M	..	..	..	..	..	..	..	..	..	..	PASS	..
HGDP01380.HO	HGDP01380	..	..	2012	PattersonGenetics2012	Modern	0	0	present	..	Basque.HO	..	France	43	0	1240K pulldown padded to 3.2M snpset	HumanOrigins	..	..	..	591678	F	..	n/a (female)	n/a (female)	..	..	..	..	..	..	..	PASS	..
HGDP01381.HO	HGDP01381	..	..	2012	PattersonGenetics2012	Modern	0	0	present	..	Adygei.HO	Caucasus, Krasnodar	Russia	44	39	1240K pulldown padded to 3.2M snpset	HumanOrigins	..	..	..	591803	F	..	n/a (female)	n/a (female)	..	..	..	..	..	..	..	PASS	..
HGDP01382.HO	HGDP01382	..	..	2012	PattersonGenetics2012	Modern	0	0	present	..	Adygei.HO	Caucasus, Krasnodar	Russia	44	39	1240K pulldown padded to 3.2M snpset	HumanOrigins	..	..	..	592732	F	..	n/a (female)	n/a (female)	..	..	..	..	..	..	..	PASS	..
HGDP01383.HO	HGDP01383	..	..	2012	PattersonGenetics2012	Modern	0	0	present	..	Adygei.HO	Caucasus, Krasnodar	Russia	44	39	1240K pulldown padded to 3.2M snpset	HumanOrigins	..	..	..	592336	M	..	..	..	..	..	..	..	..	..	..	PASS	..
HGDP01385.HO	HGDP01385	..	..	2012	PattersonGenetics2012	Modern	0	0	present	..	Adygei.HO	Caucasus, Krasnodar	Russia	44	39	1240K pulldown padded to 3.2M snpset	HumanOrigins	..	..	..	592536	M	..	..	..	..	..	..	..	..	..	..	PASS	..
HGDP01386.HO	HGDP01386	..	..	2012	PattersonGenetics2012	Modern	0	0	present	..	Adygei.HO	Caucasus, Krasnodar	Russia	44	39	1240K pulldown padded to 3.2M snpset	HumanOrigins	..	..	..	592073	F	..	n/a (female)	n/a (female)	..	..	..	..	..	..	..	PASS	..
HGDP01387.HO	HGDP01387	..	..	2012	PattersonGenetics2012	Modern	0	0	present	..	Adygei.HO	Caucasus, Krasnodar	Russia	44	39	1240K pulldown padded to 3.2M snpset	HumanOrigins	..	..	..	591887	F	..	n/a (female)	n/a (female)	..	..	..	..	..	..	..	PASS	..
HGDP01396.HO	HGDP01396	..	..	2012	PattersonGenetics2012	Modern	0	0	present	..	Adygei.HO	Caucasus, Krasnodar	Russia	44	39	1240K pulldown padded to 3.2M snpset	HumanOrigins	..	..	..	589795	M	..	..	..	..	..	..	..	..	..	..	PASS	..
HGDP01397.HO	HGDP01397	..	..	2012	PattersonGenetics2012	Modern	0	0	present	..	Adygei.HO	Caucasus, Krasnodar	Russia	44	39	1240K pulldown padded to 3.2M snpset	HumanOrigins	..	..	..	591733	M	..	..	..	..	..	..	..	..	..	..	PASS	..
HGDP01398.HO	HGDP01398	..	..	2012	PattersonGenetics2012	Modern	0	0	present	..	Adygei.HO	Caucasus, Krasnodar	Russia	44	39	1240K pulldown padded to 3.2M snpset	HumanOrigins	..	..	..	592660	F	..	n/a (female)	n/a (female)	..	..	..	..	..	..	..	PASS	..
HGDP01399.HO	HGDP01399	..	..	2012	PattersonGenetics2012	Modern	0	0	present	..	Adygei.HO	Caucasus, Krasnodar	Russia	44	39	1240K pulldown padded to 3.2M snpset	HumanOrigins	..	..	..	591807	F	..	n/a (female)	n/a (female)	..	..	..	..	..	..	..	PASS	..
HGDP01400.HO	HGDP01400	..	..	2012	PattersonGenetics2012	Modern	0	0	present	..	Adygei.HO	Caucasus, Krasnodar	Russia	44	39	1240K pulldown padded to 3.2M snpset	HumanOrigins	..	..	..	592064	F	..	n/a (female)	n/a (female)	..	..	..	..	..	..	..	PASS	..
HGDP01401.HO	HGDP01401	..	..	2012	PattersonGenetics2012	Modern	0	0	present	..	Adygei.HO	Caucasus, Krasnodar	Russia	44	39	1240K pulldown padded to 3.2M snpset	HumanOrigins	..	..	..	592653	F	..	n/a (female)	n/a (female)	..	..	..	..	..	..	..	PASS	..
HGDP01402.HO	HGDP01402	..	..	2012	PattersonGenetics2012	Modern	0	0	present	..	Adygei.HO	Caucasus, Krasnodar	Russia	44	39	1240K pulldown padded to 3.2M snpset	HumanOrigins	..	..	..	592113	M	..	..	..	..	..	..	..	..	..	..	PASS	..
HGDP01403.HO	HGDP01403	..	..	2012	PattersonGenetics2012	Modern	0	0	present	..	Adygei.HO	Caucasus, Krasnodar	Russia	44	39	1240K pulldown padded to 3.2M snpset	HumanOrigins	..	..	..	585902	M	..	..	..	..	..	..	..	..	..	..	PASS	..
HGDP01404.HO	HGDP01404	..	..	2012	PattersonGenetics2012	Modern	0	0	present	..	Adygei.HO	Caucasus, Krasnodar	Russia	44	39	1240K pulldown padded to 3.2M snpset	HumanOrigins	..	..	..	592554	M	..	..	..	..	..	..	..	..	..	..	PASS	..
ARM012.HO	ARM012	..	..	2014	LazaridisNature2014	Modern	0	0	present	..	Armenian.WGA.HO	Yerevan	Armenia	40.2	44.5	1240K pulldown padded to 3.2M snpset	HumanOrigins	..	..	..	583998	M	..	..	..	..	..	..	..	..	..	..	PASS	..
ARM013.HO	ARM013	..	..	2014	LazaridisNature2014	Modern	0	0	present	..	Armenian.WGA.HO	Yerevan	Armenia	40.2	44.5	1240K pulldown padded to 3.2M snpset	HumanOrigins	..	..	..	584257	M	..	..	..	..	..	..	..	..	..	..	PASS	..
ARM014.HO	ARM014	..	..	2014	LazaridisNature2014	Modern	0	0	present	..	Armenian.WGA.HO	Yerevan	Armenia	40.2	44.5	1240K pulldown padded to 3.2M snpset	HumanOrigins	..	..	..	586616	M	..	..	..	..	..	..	..	..	..	..	PASS	..
GEO013.HO	GEO013	..	..	2014	LazaridisNature2014	Modern	0	0	present	..	Georgian.WGA.HO	Tbilisi	Georgia	41.7	44.8	1240K pulldown padded to 3.2M snpset	HumanOrigins	..	..	..	586654	M	..	..	..	..	..	..	..	..	..	..	PASS	..
GEO014.HO	GEO014	..	..	2014	LazaridisNature2014	Modern	0	0	present	..	Georgian.WGA.HO	Tbilisi	Georgia	41.7	44.8	1240K pulldown padded to 3.2M snpset	HumanOrigins	..	..	..	579200	M	..	..	..	..	..	..	..	..	..	..	PASS	..
ASR_001.HO	ASR_001	..	..	2014	LazaridisNature2014	Modern	0	0	present	..	Assyrian.WGA.HO	Arzni	Armenia	40.3	44.6	1240K pulldown padded to 3.2M snpset	HumanOrigins	..	..	..	585820	M	..	..	..	..	..	..	..	..	..	..	PASS	..
ASR_002.HO	ASR_002	..	..	2014	LazaridisNature2014	Modern	0	0	present	..	Assyrian.WGA.HO	Arzni	Armenia	40.3	44.6	1240K pulldown padded to 3.2M snpset	HumanOrigins	..	..	..	588042	M	..	..	..	..	..	..	..	..	..	..	PASS	..
ASR_003.HO	ASR_003	..	..	2014	LazaridisNature2014	Modern	0	0	present	..	Assyrian.WGA.HO	Arzni	Armenia	40.3	44.6	1240K pulldown padded to 3.2M snpset	HumanOrigins	..	..	..	585967	M	..	..	..	..	..	..	..	..	..	..	PASS	..
ASR_004.HO	ASR_004	..	..	2014	LazaridisNature2014	Modern	0	0	present	..	Assyrian.WGA_outlier.HO	Arzni	Armenia	40.3	44.6	1240K pulldown padded to 3.2M snpset	HumanOrigins	..	..	..	580206	M	..	..	..	..	..	..	..	..	..	..	PASS	..
ASR_005.HO	ASR_005	..	..	2014	LazaridisNature2014	Modern	0	0	present	..	Assyrian.WGA.HO	Arzni	Armenia	40.3	44.6	1240K pulldown padded to 3.2M snpset	HumanOrigins	..	..	..	584198	M	..	..	..	..	..	..	..	..	..	..	PASS	..
TLA010.HO	TLA010	..	..	2014	LazaridisNature2014	Modern	0	0	present	..	Greek.WGA.HO	Athens	Greece	37.9	23.7	1240K pulldown padded to 3.2M snpset	HumanOrigins	..	..	..	588175	M	..	..	..	..	..	..	..	..	..	..	PASS	..
TLA011.HO	TLA011	..	..	2014	LazaridisNature2014	Modern	0	0	present	..	Greek_outlier.WGA.HO	Athens	Greece	37.9	23.7	1240K pulldown padded to 3.2M snpset	HumanOrigins	..	..	..	589912	M	..	..	..	..	..	..	..	..	..	..	PASS	..
TLA012.HO	TLA012	..	..	2014	LazaridisNature2014	Modern	0	0	present	..	Greek.WGA.HO	Athens	Greece	37.9	23.7	1240K pulldown padded to 3.2M snpset	HumanOrigins	..	..	..	584591	M	..	..	..	..	..	..	..	..	..	..	PASS	..
TLA013.HO	TLA013	..	..	2014	LazaridisNature2014	Modern	0	0	present	..	Greek_outlier.WGA.HO	Athens	Greece	37.9	23.7	1240K pulldown padded to 3.2M snpset	HumanOrigins	..	..	..	587961	M	..	..	..	..	..	..	..	..	..	..	PASS	..
TLA015.HO	TLA015	..	..	2014	LazaridisNature2014	Modern	0	0	present	..	Greek.WGA.HO	Athens	Greece	37.9	23.7	1240K pulldown padded to 3.2M snpset	HumanOrigins	..	..	..	579444	M	..	..	..	..	..	..	..	..	..	..	PASS	..
TLA017.HO	TLA017	..	..	2014	LazaridisNature2014	Modern	0	0	present	..	Greek.WGA.HO	Athens	Greece	37.9	23.7	1240K pulldown padded to 3.2M snpset	HumanOrigins	..	..	..	585099	M	..	..	..	..	..	..	..	..	..	..	PASS	..
TLA018.HO	TLA018	..	..	2014	LazaridisNature2014	Modern	0	0	present	..	Greek.WGA.HO	Athens	Greece	37.9	23.7	1240K pulldown padded to 3.2M snpset	HumanOrigins	..	..	..	584099	M	..	..	..	..	..	..	..	..	..	..	PASS	..
TLA019.HO	TLA019	..	..	2014	LazaridisNature2014	Modern	0	0	present	..	Greek.WGA.HO	Athens	Greece	37.9	23.7	1240K pulldown padded to 3.2M snpset	HumanOrigins	..	..	..	587220	M	..	..	..	..	..	..	..	..	..	..	PASS	..
TLA020.HO	TLA020	..	..	2014	LazaridisNature2014	Modern	0	0	present	..	Greek.WGA.HO	Athens	Greece	37.9	23.7	1240K pulldown padded to 3.2M snpset	HumanOrigins	..	..	..	587774	M	..	..	..	..	..	..	..	..	..	..	PASS	..
TLA021.HO	TLA021	..	..	2014	LazaridisNature2014	Modern	0	0	present	..	Greek.WGA.HO	Athens	Greece	37.9	23.7	1240K pulldown padded to 3.2M snpset	HumanOrigins	..	..	..	587470	M	..	..	..	..	..	..	..	..	..	..	PASS	..
TLA022.HO	TLA022	..	..	2014	LazaridisNature2014	Modern	0	0	present	..	Greek.WGA.HO	Athens	Greece	37.9	23.7	1240K pulldown padded to 3.2M snpset	HumanOrigins	..	..	..	586519	M	..	..	..	..	..	..	..	..	..	..	PASS	..
TLA023.HO	TLA023	..	..	2014	LazaridisNature2014	Modern	0	0	present	..	Greek.WGA.HO	Athens	Greece	37.9	23.7	1240K pulldown padded to 3.2M snpset	HumanOrigins	..	..	..	584449	M	..	..	..	..	..	..	..	..	..	..	PASS	..
TLA024.HO	TLA024	..	..	2014	LazaridisNature2014	Modern	0	0	present	..	Greek.WGA.HO	Athens	Greece	37.9	23.7	1240K pulldown padded to 3.2M snpset	HumanOrigins	..	..	..	584520	M	..	..	..	..	..	..	..	..	..	..	PASS	..
TLA025.HO	TLA025	..	..	2014	LazaridisNature2014	Modern	0	0	present	..	Greek.WGA.HO	Athens	Greece	37.9	23.7	1240K pulldown padded to 3.2M snpset	HumanOrigins	..	..	..	585901	M	..	..	..	..	..	..	..	..	..	..	PASS	..
TLA026.HO	TLA026	..	..	2014	LazaridisNature2014	Modern	0	0	present	..	Greek.WGA.HO	Athens	Greece	37.9	23.7	1240K pulldown padded to 3.2M snpset	HumanOrigins	..	..	..	586063	M	..	..	..	..	..	..	..	..	..	..	PASS	..
TLA027.HO	TLA027	..	..	2014	LazaridisNature2014	Modern	0	0	present	..	Greek.WGA.HO	Athens	Greece	37.9	23.7	1240K pulldown padded to 3.2M snpset	HumanOrigins	..	..	..	583541	M	..	..	..	..	..	..	..	..	..	..	PASS	..
TLA028.HO	TLA028	..	..	2014	LazaridisNature2014	Modern	0	0	present	..	Greek.WGA.HO	Athens	Greece	37.9	23.7	1240K pulldown padded to 3.2M snpset	HumanOrigins	..	..	..	587207	M	..	..	..	..	..	..	..	..	..	..	PASS	..
TLA029.HO	TLA029	..	..	2014	LazaridisNature2014	Modern	0	0	present	..	Greek.WGA.HO	Athens	Greece	37.9	23.7	1240K pulldown padded to 3.2M snpset	HumanOrigins	..	..	..	587473	M	..	..	..	..	..	..	..	..	..	..	PASS	..
BulgarianD6.HO	BulgarianD6	..	..	2014	LazaridisNature2014	Modern	0	0	present	..	Bulgarian.HO	Plovdiv	Bulgaria	42.1634	24.7412	1240K pulldown padded to 3.2M snpset	HumanOrigins	..	..	..	575707	M	..	..	..	..	..	..	..	..	..	..	PASS	..
BulgarianA4.HO	BulgarianA4	..	..	2014	LazaridisNature2014	Modern	0	0	present	..	Bulgarian.HO	Plovdiv	Bulgaria	42.1634	24.7412	1240K pulldown padded to 3.2M snpset	HumanOrigins	..	..	..	591752	M	..	..	..	..	..	..	..	..	..	..	PASS	..
hungary3.HO	hungary3	..	..	2014	LazaridisNature2014	Modern	0	0	present	..	Hungarian.HO	Budapest	Hungary	47.4875	19.0503	1240K pulldown padded to 3.2M snpset	HumanOrigins	..	..	..	592523	M	..	..	..	..	..	..	..	..	..	..	PASS	..
LithuanianF1.HO	LithuanianF1	..	..	2014	LazaridisNature2014	Modern	0	0	present	..	Lithuanian.HO	Kaunas	Lithuania	54.9019	23.9172	1240K pulldown padded to 3.2M snpset	HumanOrigins	..	..	..	592686	F	..	n/a (female)	n/a (female)	..	..	..	..	..	..	..	PASS	..
iran19.HO	iran19	..	..	2014	LazaridisNature2014	Modern	0	0	present	..	Iranian.HO	migrants_collected_in_Kuwait	Iran	35.5859	51.46	1240K pulldown padded to 3.2M snpset	HumanOrigins	..	..	..	591899	M	..	..	..	..	..	..	..	..	..	..	PASS	..
iran14.HO	iran14	..	..	2014	LazaridisNature2014	Modern	0	0	present	..	Iranian.HO	migrants_collected_in_Kuwait	Iran	35.5859	51.46	1240K pulldown padded to 3.2M snpset	HumanOrigins	..	..	..	592506	M	..	..	..	..	..	..	..	..	..	..	PASS	..
syria464.HO	syria464	..	..	2014	LazaridisNature2014	Modern	0	0	present	..	Syrian.HO	migrants collected in Kuwait	Syria	35.1289	36.8701	1240K pulldown padded to 3.2M snpset	HumanOrigins	..	..	..	592074	M	..	..	..	..	..	..	..	..	..	..	PASS	..
Lebanon5.HO	Lebanon5	..	..	2014	LazaridisNature2014	Modern	0	0	present	..	Lebanese.HO	migrants_collected_in_Kuwait	Lebanon	33.8157	35.5737	1240K pulldown padded to 3.2M snpset	HumanOrigins	..	..	..	591955	M	..	..	..	..	..	..	..	..	..	..	PASS	..
Jordan543.HO	Jordan543	..	..	2014	LazaridisNature2014	Modern	0	0	present	..	Jordanian.HO	migrants_collected_in_Kuwait	Jordan	32.0546	35.9143	1240K pulldown padded to 3.2M snpset	HumanOrigins	..	..	..	590876	M	..	..	..	..	..	..	..	..	..	..	PASS	..
BulgarianE2.HO	BulgarianE2	..	..	2014	LazaridisNature2014	Modern	0	0	present	..	Bulgarian.HO	Plovdiv	Bulgaria	42.1634	24.7412	1240K pulldown padded to 3.2M snpset	HumanOrigins	..	..	..	592162	M	..	..	..	..	..	..	..	..	..	..	PASS	..
BulgarianB4.HO	BulgarianB4	..	..	2014	LazaridisNature2014	Modern	0	0	present	..	Bulgarian.HO	Plovdiv	Bulgaria	42.1634	24.7412	1240K pulldown padded to 3.2M snpset	HumanOrigins	..	..	..	588366	M	..	..	..	..	..	..	..	..	..	..	PASS	..
hungary6.HO	hungary6	..	..	2014	LazaridisNature2014	Modern	0	0	present	..	Hungarian.HO	Budapest	Hungary	47.4875	19.0503	1240K pulldown padded to 3.2M snpset	HumanOrigins	..	..	..	592357	M	..	..	..	..	..	..	..	..	..	..	PASS	..
lithuania3.HO	lithuania3	..	..	2014	LazaridisNature2014	Modern	0	0	present	..	Lithuanian.HO	Kaunas	Lithuania	54.9019	23.9172	1240K pulldown padded to 3.2M snpset	HumanOrigins	..	..	..	590368	M	..	..	..	..	..	..	..	..	..	..	PASS	..
iran2.HO	iran2	..	..	2014	LazaridisNature2014	Modern	0	0	present	..	Iranian.HO	migrants_collected_in_Kuwait	Iran	35.5859	51.46	1240K pulldown padded to 3.2M snpset	HumanOrigins	..	..	..	592367	M	..	..	..	..	..	..	..	..	..	..	PASS	..
iran20.HO	iran20	..	..	2014	LazaridisNature2014	Modern	0	0	present	..	Iranian.HO	migrants_collected_in_Kuwait	Iran	35.5859	51.46	1240K pulldown padded to 3.2M snpset	HumanOrigins	..	..	..	591893	M	..	..	..	..	..	..	..	..	..	..	PASS	..
syria361.HO	syria361	..	..	2014	LazaridisNature2014	Modern	0	0	present	..	Syrian.HO	migrants collected in Kuwait	Syria	35.1289	36.8701	1240K pulldown padded to 3.2M snpset	HumanOrigins	..	..	..	592321	M	..	..	..	..	..	..	..	..	..	..	PASS	..
Lebanon6.HO	Lebanon6	..	..	2014	LazaridisNature2014	Modern	0	0	present	..	Lebanese.HO	migrants_collected_in_Kuwait	Lebanon	33.8157	35.5737	1240K pulldown padded to 3.2M snpset	HumanOrigins	..	..	..	590694	M	..	..	..	..	..	..	..	..	..	..	PASS	..
SaudiA5.HO	SaudiA5	..	..	2014	LazaridisNature2014	Modern	0	0	present	..	Saudi.HO	migrants_collected_in_Kuwait	Saudi Arabia	18.49	42.5171	1240K pulldown padded to 3.2M snpset	HumanOrigins	..	..	..	591619	M	..	..	..	..	..	..	..	..	..	..	PASS	..
Jordan214.HO	Jordan214	..	..	2014	LazaridisNature2014	Modern	0	0	present	..	Jordanian.HO	migrants_collected_in_Kuwait	Jordan	32.0546	35.9143	1240K pulldown padded to 3.2M snpset	HumanOrigins	..	..	..	592562	M	..	..	..	..	..	..	..	..	..	..	PASS	..
BulgarianA1.HO	BulgarianA1	..	..	2014	LazaridisNature2014	Modern	0	0	present	..	Bulgarian.HO	Plovdiv	Bulgaria	42.1634	24.7412	1240K pulldown padded to 3.2M snpset	HumanOrigins	..	..	..	586372	M	..	..	..	..	..	..	..	..	..	..	PASS	..
HungarianC5.HO	HungarianC5	..	..	2014	LazaridisNature2014	Modern	0	0	present	..	Hungarian.HO	Budapest	Hungary	47.4875	19.0503	1240K pulldown padded to 3.2M snpset	HumanOrigins	..	..	..	592234	M	..	..	..	..	..	..	..	..	..	..	PASS	..
hungary7.HO	hungary7	..	..	2014	LazaridisNature2014	Modern	0	0	present	..	Hungarian.HO	Budapest	Hungary	47.4875	19.0503	1240K pulldown padded to 3.2M snpset	HumanOrigins	..	..	..	591076	M	..	..	..	..	..	..	..	..	..	..	PASS	..
lithuania10.HO	lithuania10	..	..	2014	LazaridisNature2014	Modern	0	0	present	..	Lithuanian.HO	Kaunas	Lithuania	54.9019	23.9172	1240K pulldown padded to 3.2M snpset	HumanOrigins	..	..	..	592269	M	..	..	..	..	..	..	..	..	..	..	PASS	..
iran3.HO	iran3	..	..	2014	LazaridisNature2014	Modern	0	0	present	..	Iranian.HO	migrants_collected_in_Kuwait	Iran	35.5859	51.46	1240K pulldown padded to 3.2M snpset	HumanOrigins	..	..	..	592006	M	..	..	..	..	..	..	..	..	..	..	PASS	..
syria485.HO	syria485	..	..	2014	LazaridisNature2014	Modern	0	0	present	..	Syrian.HO	migrants collected in Kuwait	Syria	35.1289	36.8701	1240K pulldown padded to 3.2M snpset	HumanOrigins	..	..	..	592226	M	..	..	..	..	..	..	..	..	..	..	PASS	..
Lebanon7.HO	Lebanon7	..	..	2014	LazaridisNature2014	Modern	0	0	present	..	Lebanese.HO	migrants_collected_in_Kuwait	Lebanon	33.8157	35.5737	1240K pulldown padded to 3.2M snpset	HumanOrigins	..	..	..	592114	M	..	..	..	..	..	..	..	..	..	..	PASS	..
SaudiA6.HO	SaudiA6	..	..	2014	LazaridisNature2014	Modern	0	0	present	..	Saudi.HO	migrants_collected_in_Kuwait	Saudi Arabia	18.49	42.5171	1240K pulldown padded to 3.2M snpset	HumanOrigins	..	..	..	592072	M	..	..	..	..	..	..	..	..	..	..	PASS	..
Jordan445.HO	Jordan445	..	..	2014	LazaridisNature2014	Modern	0	0	present	..	Jordanian.HO	migrants_collected_in_Kuwait	Jordan	32.0546	35.9143	1240K pulldown padded to 3.2M snpset	HumanOrigins	..	..	..	592534	M	..	..	..	..	..	..	..	..	..	..	PASS	..
BulgarianB1.HO	BulgarianB1	..	..	2014	LazaridisNature2014	Modern	0	0	present	..	Bulgarian.HO	Plovdiv	Bulgaria	42.1634	24.7412	1240K pulldown padded to 3.2M snpset	HumanOrigins	..	..	..	592283	M	..	..	..	..	..	..	..	..	..	..	PASS	..
HungarianE5.HO	HungarianE5	..	..	2014	LazaridisNature2014	Modern	0	0	present	..	Hungarian.HO	Budapest	Hungary	47.4875	19.0503	1240K pulldown padded to 3.2M snpset	HumanOrigins	..	..	..	592521	M	..	..	..	..	..	..	..	..	..	..	PASS	..
HungarianH3.HO	HungarianH3	..	..	2014	LazaridisNature2014	Modern	0	0	present	..	Hungarian.HO	Budapest	Hungary	47.4875	19.0503	1240K pulldown padded to 3.2M snpset	HumanOrigins	..	..	..	592031	M	..	..	..	..	..	..	..	..	..	..	PASS	..
lithuania9.HO	lithuania9	..	..	2014	LazaridisNature2014	Modern	0	0	present	..	Lithuanian.HO	Kaunas	Lithuania	54.9019	23.9172	1240K pulldown padded to 3.2M snpset	HumanOrigins	..	..	..	592566	M	..	..	..	..	..	..	..	..	..	..	PASS	..
syria520.HO	syria520	..	..	2014	LazaridisNature2014	Modern	0	0	present	..	Syrian.HO	migrants collected in Kuwait	Syria	35.1289	36.8701	1240K pulldown padded to 3.2M snpset	HumanOrigins	..	..	..	591238	M	..	..	..	..	..	..	..	..	..	..	PASS	..
syria4.HO	syria4	..	..	2014	LazaridisNature2014	Modern	0	0	present	..	Syrian.HO	migrants collected in Kuwait	Syria	35.1289	36.8701	1240K pulldown padded to 3.2M snpset	HumanOrigins	..	..	..	592103	M	..	..	..	..	..	..	..	..	..	..	PASS	..
Lebanon8.HO	Lebanon8	..	..	2014	LazaridisNature2014	Modern	0	0	present	..	Lebanese.HO	migrants_collected_in_Kuwait	Lebanon	33.8157	35.5737	1240K pulldown padded to 3.2M snpset	HumanOrigins	..	..	..	592655	M	..	..	..	..	..	..	..	..	..	..	PASS	..
SaudiA7.HO	SaudiA7	..	..	2014	LazaridisNature2014	Modern	0	0	present	..	Saudi.HO	migrants_collected_in_Kuwait	Saudi Arabia	18.49	42.5171	1240K pulldown padded to 3.2M snpset	HumanOrigins	..	..	..	592285	M	..	..	..	..	..	..	..	..	..	..	PASS	..
Jordan62.HO	Jordan62	..	..	2014	LazaridisNature2014	Modern	0	0	present	..	Jordanian.HO	migrants_collected_in_Kuwait	Jordan	32.0546	35.9143	1240K pulldown padded to 3.2M snpset	HumanOrigins	..	..	..	592231	M	..	..	..	..	..	..	..	..	..	..	PASS	..
BulgarianC1.HO	BulgarianC1	..	..	2014	LazaridisNature2014	Modern	0	0	present	..	Bulgarian.HO	Plovdiv	Bulgaria	42.1634	24.7412	1240K pulldown padded to 3.2M snpset	HumanOrigins	..	..	..	591596	M	..	..	..	..	..	..	..	..	..	..	PASS	..
hungary15.HO	hungary15	..	..	2014	LazaridisNature2014	Modern	0	0	present	..	Hungarian.HO	Budapest	Hungary	47.4875	19.0503	1240K pulldown padded to 3.2M snpset	HumanOrigins	..	..	..	592422	M	..	..	..	..	..	..	..	..	..	..	PASS	..
LithuanianA1.HO	LithuanianA1	..	..	2014	LazaridisNature2014	Modern	0	0	present	..	Lithuanian.HO	Kaunas	Lithuania	54.9019	23.9172	1240K pulldown padded to 3.2M snpset	HumanOrigins	..	..	..	591684	M	..	..	..	..	..	..	..	..	..	..	PASS	..
LithuanianE2.HO	LithuanianE2	..	..	2014	LazaridisNature2014	Modern	0	0	present	..	Lithuanian.HO	Kaunas	Lithuania	54.9019	23.9172	1240K pulldown padded to 3.2M snpset	HumanOrigins	..	..	..	590382	F	..	n/a (female)	n/a (female)	..	..	..	..	..	..	..	PASS	..
iran11.HO	iran11	..	..	2014	LazaridisNature2014	Modern	0	0	present	..	Iranian.HO	migrants_collected_in_Kuwait	Iran	35.5859	51.46	1240K pulldown padded to 3.2M snpset	HumanOrigins	..	..	..	591794	M	..	..	..	..	..	..	..	..	..	..	PASS	..
syria461.HO	syria461	..	..	2014	LazaridisNature2014	Modern	0	0	present	..	Syrian.HO	migrants collected in Kuwait	Syria	35.1289	36.8701	1240K pulldown padded to 3.2M snpset	HumanOrigins	..	..	..	592529	M	..	..	..	..	..	..	..	..	..	..	PASS	..
Lebanon1.HO	Lebanon1	..	..	2014	LazaridisNature2014	Modern	0	0	present	..	Lebanese.HO	migrants_collected_in_Kuwait	Lebanon	33.8157	35.5737	1240K pulldown padded to 3.2M snpset	HumanOrigins	..	..	..	592481	M	..	..	..	..	..	..	..	..	..	..	PASS	..
saudi1434.HO	saudi1434	..	..	2014	LazaridisNature2014	Modern	0	0	present	..	Saudi.HO	migrants_collected_in_Kuwait	Saudi Arabia	18.49	42.5171	1240K pulldown padded to 3.2M snpset	HumanOrigins	..	..	..	591875	M	..	..	..	..	..	..	..	..	..	..	PASS	..
Jordan603.HO	Jordan603	..	..	2014	LazaridisNature2014	Modern	0	0	present	..	Jordanian.HO	migrants_collected_in_Kuwait	Jordan	32.0546	35.9143	1240K pulldown padded to 3.2M snpset	HumanOrigins	..	..	..	591902	M	..	..	..	..	..	..	..	..	..	..	PASS	..
BulgarianF1.HO	BulgarianF1	..	..	2014	LazaridisNature2014	Modern	0	0	present	..	Bulgarian.HO	Plovdiv	Bulgaria	42.1634	24.7412	1240K pulldown padded to 3.2M snpset	HumanOrigins	..	..	..	592593	M	..	..	..	..	..	..	..	..	..	..	PASS	..
hungary20.HO	hungary20	..	..	2014	LazaridisNature2014	Modern	0	0	present	..	Hungarian.HO	Budapest	Hungary	47.4875	19.0503	1240K pulldown padded to 3.2M snpset	HumanOrigins	..	..	..	592525	M	..	..	..	..	..	..	..	..	..	..	PASS	..
lithuania1.HO	lithuania1	..	..	2014	LazaridisNature2014	Modern	0	0	present	..	Lithuanian.HO	Kaunas	Lithuania	54.9019	23.9172	1240K pulldown padded to 3.2M snpset	HumanOrigins	..	..	..	592154	M	..	..	..	..	..	..	..	..	..	..	PASS	..
lithuania8.HO	lithuania8	..	..	2014	LazaridisNature2014	Modern	0	0	present	..	Lithuanian.HO	Kaunas	Lithuania	54.9019	23.9172	1240K pulldown padded to 3.2M snpset	HumanOrigins	..	..	..	587658	M	..	..	..	..	..	..	..	..	..	..	PASS	..
iran16.HO	iran16	..	..	2014	LazaridisNature2014	Modern	0	0	present	..	Iranian.HO	migrants_collected_in_Kuwait	Iran	35.5859	51.46	1240K pulldown padded to 3.2M snpset	HumanOrigins	..	..	..	590380	M	..	..	..	..	..	..	..	..	..	..	PASS	..
Lebanon2.HO	Lebanon2	..	..	2014	LazaridisNature2014	Modern	0	0	present	..	Lebanese.HO	migrants_collected_in_Kuwait	Lebanon	33.8157	35.5737	1240K pulldown padded to 3.2M snpset	HumanOrigins	..	..	..	591948	M	..	..	..	..	..	..	..	..	..	..	PASS	..
saudi1424.HO	saudi1424	..	..	2014	LazaridisNature2014	Modern	0	0	present	..	Saudi.HO	migrants_collected_in_Kuwait	Saudi Arabia	18.49	42.5171	1240K pulldown padded to 3.2M snpset	HumanOrigins	..	..	..	592414	M	..	..	..	..	..	..	..	..	..	..	PASS	..
SaudiA9.HO	SaudiA9	..	..	2014	LazaridisNature2014	Modern	0	0	present	..	Saudi.HO	migrants_collected_in_Kuwait	Saudi Arabia	18.49	42.5171	1240K pulldown padded to 3.2M snpset	HumanOrigins	..	..	..	592591	M	..	..	..	..	..	..	..	..	..	..	PASS	..
Jordan307.HO	Jordan307	..	..	2014	LazaridisNature2014	Modern	0	0	present	..	Jordanian.HO	migrants_collected_in_Kuwait	Jordan	32.0546	35.9143	1240K pulldown padded to 3.2M snpset	HumanOrigins	..	..	..	590205	M	..	..	..	..	..	..	..	..	..	..	PASS	..
BulgarianH2.HO	BulgarianH2	..	..	2014	LazaridisNature2014	Modern	0	0	present	..	Bulgarian.HO	Plovdiv	Bulgaria	42.1634	24.7412	1240K pulldown padded to 3.2M snpset	HumanOrigins	..	..	..	592478	F	..	n/a (female)	n/a (female)	..	..	..	..	..	..	..	PASS	..
hungary2.HO	hungary2	..	..	2014	LazaridisNature2014	Modern	0	0	present	..	Hungarian.HO	Budapest	Hungary	47.4875	19.0503	1240K pulldown padded to 3.2M snpset	HumanOrigins	..	..	..	592584	M	..	..	..	..	..	..	..	..	..	..	PASS	..
lithuania2.HO	lithuania2	..	..	2014	LazaridisNature2014	Modern	0	0	present	..	Lithuanian.HO	Kaunas	Lithuania	54.9019	23.9172	1240K pulldown padded to 3.2M snpset	HumanOrigins	..	..	..	592030	M	..	..	..	..	..	..	..	..	..	..	PASS	..
iran17.HO	iran17	..	..	2014	LazaridisNature2014	Modern	0	0	present	..	Iranian.HO	migrants_collected_in_Kuwait	Iran	35.5859	51.46	1240K pulldown padded to 3.2M snpset	HumanOrigins	..	..	..	590041	M	..	..	..	..	..	..	..	..	..	..	PASS	..
syria6.HO	syria6	..	..	2014	LazaridisNature2014	Modern	0	0	present	..	Syrian.HO	migrants collected in Kuwait	Syria	35.1289	36.8701	1240K pulldown padded to 3.2M snpset	HumanOrigins	..	..	..	591234	M	..	..	..	..	..	..	..	..	..	..	PASS	..
Lebanon3.HO	Lebanon3	..	..	2014	LazaridisNature2014	Modern	0	0	present	..	Lebanese.HO	migrants_collected_in_Kuwait	Lebanon	33.8157	35.5737	1240K pulldown padded to 3.2M snpset	HumanOrigins	..	..	..	590000	M	..	..	..	..	..	..	..	..	..	..	PASS	..
Jordan503.HO	Jordan503	..	..	2014	LazaridisNature2014	Modern	0	0	present	..	Jordanian.HO	migrants_collected_in_Kuwait	Jordan	32.0546	35.9143	1240K pulldown padded to 3.2M snpset	HumanOrigins	..	..	..	592302	M	..	..	..	..	..	..	..	..	..	..	PASS	..
BulgarianF2.HO	BulgarianF2	..	..	2014	LazaridisNature2014	Modern	0	0	present	..	Bulgarian.HO	Plovdiv	Bulgaria	42.1634	24.7412	1240K pulldown padded to 3.2M snpset	HumanOrigins	..	..	..	591961	F	..	n/a (female)	n/a (female)	..	..	..	..	..	..	..	PASS	..
HungarianD1.HO	HungarianD1	..	..	2014	LazaridisNature2014	Modern	0	0	present	..	Hungarian.HO	Budapest	Hungary	47.4875	19.0503	1240K pulldown padded to 3.2M snpset	HumanOrigins	..	..	..	592278	M	..	..	..	..	..	..	..	..	..	..	PASS	..
LithuanianD1.HO	LithuanianD1	..	..	2014	LazaridisNature2014	Modern	0	0	present	..	Lithuanian.HO	Kaunas	Lithuania	54.9019	23.9172	1240K pulldown padded to 3.2M snpset	HumanOrigins	..	..	..	592623	F	..	n/a (female)	n/a (female)	..	..	..	..	..	..	..	PASS	..
syria7.HO	syria7	..	..	2014	LazaridisNature2014	Modern	0	0	present	..	Syrian.HO	migrants collected in Kuwait	Syria	35.1289	36.8701	1240K pulldown padded to 3.2M snpset	HumanOrigins	..	..	..	591818	M	..	..	..	..	..	..	..	..	..	..	PASS	..
Lebanon4.HO	Lebanon4	..	..	2014	LazaridisNature2014	Modern	0	0	present	..	Lebanese.HO	migrants_collected_in_Kuwait	Lebanon	33.8157	35.5737	1240K pulldown padded to 3.2M snpset	HumanOrigins	..	..	..	590527	M	..	..	..	..	..	..	..	..	..	..	PASS	..
SaudiA1.HO	SaudiA1	..	..	2014	LazaridisNature2014	Modern	0	0	present	..	Saudi.HO	migrants_collected_in_Kuwait	Saudi Arabia	18.49	42.5171	1240K pulldown padded to 3.2M snpset	HumanOrigins	..	..	..	591748	M	..	..	..	..	..	..	..	..	..	..	PASS	..
Jordan646.HO	Jordan646	..	..	2014	LazaridisNature2014	Modern	0	0	present	..	Jordanian.HO	migrants_collected_in_Kuwait	Jordan	32.0546	35.9143	1240K pulldown padded to 3.2M snpset	HumanOrigins	..	..	..	588172	M	..	..	..	..	..	..	..	..	..	..	PASS	..
Jordan384.HO	Jordan384	..	..	2014	LazaridisNature2014	Modern	0	0	present	..	Jordanian.HO	migrants_collected_in_Kuwait	Jordan	32.0546	35.9143	1240K pulldown padded to 3.2M snpset	HumanOrigins	..	..	..	590552	M	..	..	..	..	..	..	..	..	..	..	PASS	..
bal102.HO	bal102	..	..	2014	LazaridisNature2014	Modern	0	0	present	..	Balkar.HO	Nalchik_in_Kabardino-Balkar-Republic	Russia	43.4833	43.6167	1240K pulldown padded to 3.2M snpset	HumanOrigins	..	..	..	591950	M	..	..	..	..	..	..	..	..	..	..	PASS	..
bal64.HO	bal64	..	..	2014	LazaridisNature2014	Modern	0	0	present	..	Balkar.HO	Nalchik_in_Kabardino-Balkar-Republic	Russia	43.4833	43.6167	1240K pulldown padded to 3.2M snpset	HumanOrigins	..	..	..	592320	M	..	..	..	..	..	..	..	..	..	..	PASS	..
mg43.HO	mg43	..	..	2014	LazaridisNature2014	Modern	0	0	present	..	Georgian.HO	Zugdidi_in_Megrelia	Georgia	42.5	41.85	1240K pulldown padded to 3.2M snpset	HumanOrigins	..	..	..	591560	M	..	..	..	..	..	..	..	..	..	..	PASS	..
ch126.HO	ch126	..	..	2014	LazaridisNature2014	Modern	0	0	present	..	Chechen.HO	Grozny_in_Chechen_Republic	Russia	43.3333	45.65	1240K pulldown padded to 3.2M snpset	HumanOrigins	..	..	..	591826	M	..	..	..	..	..	..	..	..	..	..	PASS	..
abh27.HO	abh27	..	..	2014	LazaridisNature2014	Modern	0	0	present	..	Abkhasian.HO	Sukhum	Abkhazia	43.0033	41.0153	1240K pulldown padded to 3.2M snpset	HumanOrigins	..	..	..	592348	M	..	..	..	..	..	..	..	..	..	..	PASS	..
lez38.HO	lez38	..	..	2014	LazaridisNature2014	Modern	0	0	present	..	Lezgin.HO	Dagestanskiye_Ogni_in_Dagestan	Russia	42.1167	48.1833	1240K pulldown padded to 3.2M snpset	HumanOrigins	..	..	..	576326	M	..	..	..	..	..	..	..	..	..	..	PASS	..
bal124.HO	bal124	..	..	2014	LazaridisNature2014	Modern	0	0	present	..	Balkar.HO	Nalchik_in_Kabardino-Balkar-Republic	Russia	43.4833	43.6167	1240K pulldown padded to 3.2M snpset	HumanOrigins	..	..	..	589725	M	..	..	..	..	..	..	..	..	..	..	PASS	..
bal97.HO	bal97	..	..	2014	LazaridisNature2014	Modern	0	0	present	..	Balkar.HO	Nalchik_in_Kabardino-Balkar-Republic	Russia	43.4833	43.6167	1240K pulldown padded to 3.2M snpset	HumanOrigins	..	..	..	592287	M	..	..	..	..	..	..	..	..	..	..	PASS	..
mg47.HO	mg47	..	..	2014	LazaridisNature2014	Modern	0	0	present	..	Georgian.HO	Zugdidi_in_Megrelia	Georgia	42.5	41.85	1240K pulldown padded to 3.2M snpset	HumanOrigins	..	..	..	592560	M	..	..	..	..	..	..	..	..	..	..	PASS	..
ch16.HO	ch16	..	..	2014	LazaridisNature2014	Modern	0	0	present	..	Chechen.HO	Grozny_in_Chechen_Republic	Russia	43.3333	45.65	1240K pulldown padded to 3.2M snpset	HumanOrigins	..	..	..	592511	M	..	..	..	..	..	..	..	..	..	..	PASS	..
abh107.HO	abh107	..	..	2014	LazaridisNature2014	Modern	0	0	present	..	Russia_Abkhasian.HO	Sukhum	Abkhazia	43.0033	41.0153	1240K pulldown padded to 3.2M snpset	HumanOrigins	..	..	..	591481	M	..	..	..	..	..	..	..	..	..	..	PASS	..
abh41.HO	abh41	..	..	2014	LazaridisNature2014	Modern	0	0	present	..	Abkhasian.HO	Sukhum	Abkhazia	43.0033	41.0153	1240K pulldown padded to 3.2M snpset	HumanOrigins	..	..	..	587206	M	..	..	..	..	..	..	..	..	..	..	PASS	..
lez40.HO	lez40	..	..	2014	LazaridisNature2014	Modern	0	0	present	..	Lezgin.HO	Dagestanskiye_Ogni_in_Dagestan	Russia	42.1167	48.1833	1240K pulldown padded to 3.2M snpset	HumanOrigins	..	..	..	591746	M	..	..	..	..	..	..	..	..	..	..	PASS	..
kumyks44.HO	kumyks44	..	..	2014	LazaridisNature2014	Modern	0	0	present	..	Kumyk.HO	Khasavyurt_in_Dagestan	Russia	43.25	46.5833	1240K pulldown padded to 3.2M snpset	HumanOrigins	..	..	..	591166	M	..	..	..	..	..	..	..	..	..	..	PASS	..
bal136.HO	bal136	..	..	2014	LazaridisNature2014	Modern	0	0	present	..	Balkar.HO	Nalchik_in_Kabardino-Balkar-Republic	Russia	43.4833	43.6167	1240K pulldown padded to 3.2M snpset	HumanOrigins	..	..	..	592388	M	..	..	..	..	..	..	..	..	..	..	PASS	..
mg22.HO	mg22	..	..	2014	LazaridisNature2014	Modern	0	0	present	..	Georgian.HO	Zugdidi_in_Megrelia	Georgia	42.5	41.85	1240K pulldown padded to 3.2M snpset	HumanOrigins	..	..	..	592266	M	..	..	..	..	..	..	..	..	..	..	PASS	..
mg49.HO	mg49	..	..	2014	LazaridisNature2014	Modern	0	0	present	..	Georgian.HO	Zugdidi_in_Megrelia	Georgia	42.5	41.85	1240K pulldown padded to 3.2M snpset	HumanOrigins	..	..	..	591944	M	..	..	..	..	..	..	..	..	..	..	PASS	..
ch174.HO	ch174	..	..	2014	LazaridisNature2014	Modern	0	0	present	..	Chechen.HO	Grozny_in_Chechen_Republic	Russia	43.3333	45.65	1240K pulldown padded to 3.2M snpset	HumanOrigins	..	..	..	591614	M	..	..	..	..	..	..	..	..	..	..	PASS	..
abh119.HO	abh119	..	..	2014	LazaridisNature2014	Modern	0	0	present	..	Abkhasian.HO	Sukhum	Abkhazia	43.0033	41.0153	1240K pulldown padded to 3.2M snpset	HumanOrigins	..	..	..	591093	M	..	..	..	..	..	..	..	..	..	..	PASS	..
bal22.HO	bal22	..	..	2014	LazaridisNature2014	Modern	0	0	present	..	Balkar.HO	Nalchik_in_Kabardino-Balkar-Republic	Russia	43.4833	43.6167	1240K pulldown padded to 3.2M snpset	HumanOrigins	..	..	..	592305	M	..	..	..	..	..	..	..	..	..	..	PASS	..
mg23.HO	mg23	..	..	2014	LazaridisNature2014	Modern	0	0	present	..	Georgian.HO	Zugdidi_in_Megrelia	Georgia	42.5	41.85	1240K pulldown padded to 3.2M snpset	HumanOrigins	..	..	..	592669	M	..	..	..	..	..	..	..	..	..	..	PASS	..
mg62.HO	mg62	..	..	2014	LazaridisNature2014	Modern	0	0	present	..	Georgian.HO	Zugdidi_in_Megrelia	Georgia	42.5	41.85	1240K pulldown padded to 3.2M snpset	HumanOrigins	..	..	..	591829	M	..	..	..	..	..	..	..	..	..	..	PASS	..
ch179.HO	ch179	..	..	2014	LazaridisNature2014	Modern	0	0	present	..	Chechen.HO	Grozny_in_Chechen_Republic	Russia	43.3333	45.65	1240K pulldown padded to 3.2M snpset	HumanOrigins	..	..	..	590202	M	..	..	..	..	..	..	..	..	..	..	PASS	..
abh122.HO	abh122	..	..	2014	LazaridisNature2014	Modern	0	0	present	..	Abkhasian.HO	Sukhum	Abkhazia	43.0033	41.0153	1240K pulldown padded to 3.2M snpset	HumanOrigins	..	..	..	592494	M	..	..	..	..	..	..	..	..	..	..	PASS	..
lez49.HO	lez49	..	..	2014	LazaridisNature2014	Modern	0	0	present	..	Lezgin.HO	Dagestanskiye_Ogni_in_Dagestan	Russia	42.1167	48.1833	1240K pulldown padded to 3.2M snpset	HumanOrigins	..	..	..	592246	M	..	..	..	..	..	..	..	..	..	..	PASS	..
kumyks93.HO	kumyks93	..	..	2014	LazaridisNature2014	Modern	0	0	present	..	Kumyk.HO	Khasavyurt_in_Dagestan	Russia	43.25	46.5833	1240K pulldown padded to 3.2M snpset	HumanOrigins	..	..	..	592001	M	..	..	..	..	..	..	..	..	..	..	PASS	..
bal41.HO	bal41	..	..	2014	LazaridisNature2014	Modern	0	0	present	..	Balkar.HO	Nalchik_in_Kabardino-Balkar-Republic	Russia	43.4833	43.6167	1240K pulldown padded to 3.2M snpset	HumanOrigins	..	..	..	590224	M	..	..	..	..	..	..	..	..	..	..	PASS	..
mg27.HO	mg27	..	..	2014	LazaridisNature2014	Modern	0	0	present	..	Georgian.HO	Zugdidi_in_Megrelia	Georgia	42.5	41.85	1240K pulldown padded to 3.2M snpset	HumanOrigins	..	..	..	591574	M	..	..	..	..	..	..	..	..	..	..	PASS	..
ch193.HO	ch193	..	..	2014	LazaridisNature2014	Modern	0	0	present	..	Chechen.HO	Grozny_in_Chechen_Republic	Russia	43.3333	45.65	1240K pulldown padded to 3.2M snpset	HumanOrigins	..	..	..	592634	M	..	..	..	..	..	..	..	..	..	..	PASS	..
abh133.HO	abh133	..	..	2014	LazaridisNature2014	Modern	0	0	present	..	Abkhasian.HO	Sukhum	Abkhazia	43.0033	41.0153	1240K pulldown padded to 3.2M snpset	HumanOrigins	..	..	..	590709	M	..	..	..	..	..	..	..	..	..	..	PASS	..
lez31.HO	lez31	..	..	2014	LazaridisNature2014	Modern	0	0	present	..	Lezgin.HO	Dagestanskiye_Ogni_in_Dagestan	Russia	42.1167	48.1833	1240K pulldown padded to 3.2M snpset	HumanOrigins	..	..	..	592348	M	..	..	..	..	..	..	..	..	..	..	PASS	..
lez7.HO	lez7	..	..	2014	LazaridisNature2014	Modern	0	0	present	..	Lezgin.HO	Dagestanskiye_Ogni_in_Dagestan	Russia	42.1167	48.1833	1240K pulldown padded to 3.2M snpset	HumanOrigins	..	..	..	592271	F	..	n/a (female)	n/a (female)	..	..	..	..	..	..	..	PASS	..
kumyks98.HO	kumyks98	..	..	2014	LazaridisNature2014	Modern	0	0	present	..	Kumyk.HO	Khasavyurt_in_Dagestan	Russia	43.25	46.5833	1240K pulldown padded to 3.2M snpset	HumanOrigins	..	..	..	586726	F	..	n/a (female)	n/a (female)	..	..	..	..	..	..	..	PASS	..
bal42.HO	bal42	..	..	2014	LazaridisNature2014	Modern	0	0	present	..	Balkar.HO	Nalchik_in_Kabardino-Balkar-Republic	Russia	43.4833	43.6167	1240K pulldown padded to 3.2M snpset	HumanOrigins	..	..	..	592656	M	..	..	..	..	..	..	..	..	..	..	PASS	..
mg31.HO	mg31	..	..	2014	LazaridisNature2014	Modern	0	0	present	..	Georgian.HO	Zugdidi_in_Megrelia	Georgia	42.5	41.85	1240K pulldown padded to 3.2M snpset	HumanOrigins	..	..	..	591354	M	..	..	..	..	..	..	..	..	..	..	PASS	..
ch21.HO	ch21	..	..	2014	LazaridisNature2014	Modern	0	0	present	..	Chechen.HO	Grozny_in_Chechen_Republic	Russia	43.3333	45.65	1240K pulldown padded to 3.2M snpset	HumanOrigins	..	..	..	590241	M	..	..	..	..	..	..	..	..	..	..	PASS	..
abh147.HO	abh147	..	..	2014	LazaridisNature2014	Modern	0	0	present	..	Abkhasian.HO	Sukhum	Abkhazia	43.0033	41.0153	1240K pulldown padded to 3.2M snpset	HumanOrigins	..	..	..	592322	M	..	..	..	..	..	..	..	..	..	..	PASS	..
lez33.HO	lez33	..	..	2014	LazaridisNature2014	Modern	0	0	present	..	Lezgin.HO	Dagestanskiye_Ogni_in_Dagestan	Russia	42.1167	48.1833	1240K pulldown padded to 3.2M snpset	HumanOrigins	..	..	..	592285	M	..	..	..	..	..	..	..	..	..	..	PASS	..
lez9.HO	lez9	..	..	2014	LazaridisNature2014	Modern	0	0	present	..	Lezgin.HO	Dagestanskiye_Ogni_in_Dagestan	Russia	42.1167	48.1833	1240K pulldown padded to 3.2M snpset	HumanOrigins	..	..	..	591063	F	..	n/a (female)	n/a (female)	..	..	..	..	..	..	..	PASS	..
kumyks90.HO	kumyks90	..	..	2014	LazaridisNature2014	Modern	0	0	present	..	Kumyk.HO	Khasavyurt_in_Dagestan	Russia	43.25	46.5833	1240K pulldown padded to 3.2M snpset	HumanOrigins	..	..	..	591445	F	..	n/a (female)	n/a (female)	..	..	..	..	..	..	..	PASS	..
bal45.HO	bal45	..	..	2014	LazaridisNature2014	Modern	0	0	present	..	Balkar.HO	Nalchik_in_Kabardino-Balkar-Republic	Russia	43.4833	43.6167	1240K pulldown padded to 3.2M snpset	HumanOrigins	..	..	..	592165	M	..	..	..	..	..	..	..	..	..	..	PASS	..
mg34.HO	mg34	..	..	2014	LazaridisNature2014	Modern	0	0	present	..	Georgian.HO	Zugdidi_in_Megrelia	Georgia	42.5	41.85	1240K pulldown padded to 3.2M snpset	HumanOrigins	..	..	..	592718	M	..	..	..	..	..	..	..	..	..	..	PASS	..
ch3.HO	ch3	..	..	2014	LazaridisNature2014	Modern	0	0	present	..	Chechen.HO	Grozny_in_Chechen_Republic	Russia	43.3333	45.65	1240K pulldown padded to 3.2M snpset	HumanOrigins	..	..	..	589443	M	..	..	..	..	..	..	..	..	..	..	PASS	..
abh154.HO	abh154	..	..	2014	LazaridisNature2014	Modern	0	0	present	..	Abkhasian.HO	Sukhum	Abkhazia	43.0033	41.0153	1240K pulldown padded to 3.2M snpset	HumanOrigins	..	..	..	592580	M	..	..	..	..	..	..	..	..	..	..	PASS	..
lez36.HO	lez36	..	..	2014	LazaridisNature2014	Modern	0	0	present	..	Lezgin.HO	Dagestanskiye_Ogni_in_Dagestan	Russia	42.1167	48.1833	1240K pulldown padded to 3.2M snpset	HumanOrigins	..	..	..	585385	M	..	..	..	..	..	..	..	..	..	..	PASS	..
kumyks40.HO	kumyks40	..	..	2014	LazaridisNature2014	Modern	0	0	present	..	Kumyk.HO	Khasavyurt_in_Dagestan	Russia	43.25	46.5833	1240K pulldown padded to 3.2M snpset	HumanOrigins	..	..	..	592298	F	..	n/a (female)	n/a (female)	..	..	..	..	..	..	..	PASS	..
kumyks94.HO	kumyks94	..	..	2014	LazaridisNature2014	Modern	0	0	present	..	Kumyk.HO	Khasavyurt_in_Dagestan	Russia	43.25	46.5833	1240K pulldown padded to 3.2M snpset	HumanOrigins	..	..	..	592084	F	..	n/a (female)	n/a (female)	..	..	..	..	..	..	..	PASS	..
bal50.HO	bal50	..	..	2014	LazaridisNature2014	Modern	0	0	present	..	Balkar.HO	Nalchik_in_Kabardino-Balkar-Republic	Russia	43.4833	43.6167	1240K pulldown padded to 3.2M snpset	HumanOrigins	..	..	..	592240	M	..	..	..	..	..	..	..	..	..	..	PASS	..
mg40.HO	mg40	..	..	2014	LazaridisNature2014	Modern	0	0	present	..	Georgian.HO	Zugdidi_in_Megrelia	Georgia	42.5	41.85	1240K pulldown padded to 3.2M snpset	HumanOrigins	..	..	..	591287	M	..	..	..	..	..	..	..	..	..	..	PASS	..
ch113.HO	ch113	..	..	2014	LazaridisNature2014	Modern	0	0	present	..	Chechen.HO	Grozny_in_Chechen_Republic	Russia	43.3333	45.65	1240K pulldown padded to 3.2M snpset	HumanOrigins	..	..	..	592193	M	..	..	..	..	..	..	..	..	..	..	PASS	..
ch31.HO	ch31	..	..	2014	LazaridisNature2014	Modern	0	0	present	..	Chechen.HO	Grozny_in_Chechen_Republic	Russia	43.3333	45.65	1240K pulldown padded to 3.2M snpset	HumanOrigins	..	..	..	592512	M	..	..	..	..	..	..	..	..	..	..	PASS	..
abh24.HO	abh24	..	..	2014	LazaridisNature2014	Modern	0	0	present	..	Abkhasian.HO	Sukhum	Abkhazia	43.0033	41.0153	1240K pulldown padded to 3.2M snpset	HumanOrigins	..	..	..	591910	M	..	..	..	..	..	..	..	..	..	..	PASS	..
lez37.HO	lez37	..	..	2014	LazaridisNature2014	Modern	0	0	present	..	Lezgin.HO	Dagestanskiye_Ogni_in_Dagestan	Russia	42.1167	48.1833	1240K pulldown padded to 3.2M snpset	HumanOrigins	..	..	..	592399	M	..	..	..	..	..	..	..	..	..	..	PASS	..
kumyks41.HO	kumyks41	..	..	2014	LazaridisNature2014	Modern	0	0	present	..	Kumyk.HO	Khasavyurt_in_Dagestan	Russia	43.25	46.5833	1240K pulldown padded to 3.2M snpset	HumanOrigins	..	..	..	590397	M	..	..	..	..	..	..	..	..	..	..	PASS	..
kumyks97.HO	kumyks97	..	..	2014	LazaridisNature2014	Modern	0	0	present	..	Kumyk.HO	Khasavyurt_in_Dagestan	Russia	43.25	46.5833	1240K pulldown padded to 3.2M snpset	HumanOrigins	..	..	..	592371	F	..	n/a (female)	n/a (female)	..	..	..	..	..	..	..	PASS	..
bel43s.HO	bel43s	..	..	2014	LazaridisNature2014	Modern	0	0	present	..	Belarusian.HO	Vitebsk, Senno, Shumilino, Glubokoe, Dubrovno, Slutsk, Cherven, Kobrin	Belarus	53.9199	28.0119	1240K pulldown padded to 3.2M snpset	HumanOrigins	..	..	..	591650	M	..	..	..	..	..	..	..	..	..	..	PASS	..
UkrBel618.HO	UkrBel618	..	..	2014	LazaridisNature2014	Modern	0	0	present	..	Ukrainian.HO	Belgorod	Russia	50.2871	31.5574	1240K pulldown padded to 3.2M snpset	HumanOrigins	..	..	..	591584	M	..	..	..	..	..	..	..	..	..	..	PASS	..
UkrLv240.HO	UkrLv240	..	..	2014	LazaridisNature2014	Modern	0	0	present	..	Ukrainian.HO	Lviv	Ukraine	49.85	24.0167	1240K pulldown padded to 3.2M snpset	HumanOrigins	..	..	..	584828	M	..	..	..	..	..	..	..	..	..	..	PASS	..
Est393.HO	Est393	..	..	2014	LazaridisNature2014	Modern	0	0	present	..	Estonian.HO	Parnu, Avinurme, Viljandi, Talinn	Estonia	58.539	24.8893	1240K pulldown padded to 3.2M snpset	HumanOrigins	..	..	..	592094	M	..	..	..	..	..	..	..	..	..	..	PASS	..
Mordovians27.HO	Mordovians27	..	..	2014	LazaridisNature2014	Modern	0	0	present	..	Mordovian.HO	Saransk_in_Republic_of_Mordova	Russia	54.1833	45.1833	1240K pulldown padded to 3.2M snpset	HumanOrigins	..	..	..	591849	M	..	..	..	..	..	..	..	..	..	..	PASS	..
bel30s.HO	bel30s	..	..	2014	LazaridisNature2014	Modern	0	0	present	..	Belarusian.HO	Vitebsk, Senno, Shumilino, Glubokoe, Dubrovno, Slutsk, Cherven, Kobrin	Belarus	53.9199	28.0119	1240K pulldown padded to 3.2M snpset	HumanOrigins	..	..	..	592351	M	..	..	..	..	..	..	..	..	..	..	PASS	..
UkrBel620.HO	UkrBel620	..	..	2014	LazaridisNature2014	Modern	0	0	present	..	Ukrainian.HO	Belgorod	Russia	50.2871	31.5574	1240K pulldown padded to 3.2M snpset	HumanOrigins	..	..	..	592214	M	..	..	..	..	..	..	..	..	..	..	PASS	..
Est375.HO	Est375	..	..	2014	LazaridisNature2014	Modern	0	0	present	..	Estonian.HO	Parnu, Avinurme, Viljandi, Talinn	Estonia	58.539	24.8893	1240K pulldown padded to 3.2M snpset	HumanOrigins	..	..	..	592064	M	..	..	..	..	..	..	..	..	..	..	PASS	..
Est380.HO	Est380	..	..	2014	LazaridisNature2014	Modern	0	0	present	..	Estonian.HO	Parnu, Avinurme, Viljandi, Talinn	Estonia	58.539	24.8893	1240K pulldown padded to 3.2M snpset	HumanOrigins	..	..	..	592539	M	..	..	..	..	..	..	..	..	..	..	PASS	..
Mordovians28.HO	Mordovians28	..	..	2014	LazaridisNature2014	Modern	0	0	present	..	Mordovian.HO	Saransk_in_Republic_of_Mordova	Russia	54.1833	45.1833	1240K pulldown padded to 3.2M snpset	HumanOrigins	..	..	..	591513	M	..	..	..	..	..	..	..	..	..	..	PASS	..
bel72c.HO	bel72c	..	..	2014	LazaridisNature2014	Modern	0	0	present	..	Belarusian.HO	Vitebsk, Senno, Shumilino, Glubokoe, Dubrovno, Slutsk, Cherven, Kobrin	Belarus	53.9199	28.0119	1240K pulldown padded to 3.2M snpset	HumanOrigins	..	..	..	591064	M	..	..	..	..	..	..	..	..	..	..	PASS	..
UkrBel622.HO	UkrBel622	..	..	2014	LazaridisNature2014	Modern	0	0	present	..	Ukrainian.HO	Belgorod	Russia	50.2871	31.5574	1240K pulldown padded to 3.2M snpset	HumanOrigins	..	..	..	592469	M	..	..	..	..	..	..	..	..	..	..	PASS	..
Est391.HO	Est391	..	..	2014	LazaridisNature2014	Modern	0	0	present	..	Estonian.HO	Parnu, Avinurme, Viljandi, Talinn	Estonia	58.539	24.8893	1240K pulldown padded to 3.2M snpset	HumanOrigins	..	..	..	591946	M	..	..	..	..	..	..	..	..	..	..	PASS	..
Est377.HO	Est377	..	..	2014	LazaridisNature2014	Modern	0	0	present	..	Estonian.HO	Parnu, Avinurme, Viljandi, Talinn	Estonia	58.539	24.8893	1240K pulldown padded to 3.2M snpset	HumanOrigins	..	..	..	592397	M	..	..	..	..	..	..	..	..	..	..	PASS	..
Mordovians30.HO	Mordovians30	..	..	2014	LazaridisNature2014	Modern	0	0	present	..	Mordovian.HO	Saransk_in_Republic_of_Mordova	Russia	54.1833	45.1833	1240K pulldown padded to 3.2M snpset	HumanOrigins	..	..	..	590527	M	..	..	..	..	..	..	..	..	..	..	PASS	..
bel93c.HO	bel93c	..	..	2014	LazaridisNature2014	Modern	0	0	present	..	Belarusian.HO	Vitebsk, Senno, Shumilino, Glubokoe, Dubrovno, Slutsk, Cherven, Kobrin	Belarus	53.9199	28.0119	1240K pulldown padded to 3.2M snpset	HumanOrigins	..	..	..	589413	M	..	..	..	..	..	..	..	..	..	..	PASS	..
UkrBel733.HO	UkrBel733	..	..	2014	LazaridisNature2014	Modern	0	0	present	..	Ukrainian.HO	Belgorod	Russia	50.2871	31.5574	1240K pulldown padded to 3.2M snpset	HumanOrigins	..	..	..	592137	F	..	n/a (female)	n/a (female)	..	..	..	..	..	..	..	PASS	..
Est372.HO	Est372	..	..	2014	LazaridisNature2014	Modern	0	0	present	..	Estonian.HO	Parnu, Avinurme, Viljandi, Talinn	Estonia	58.539	24.8893	1240K pulldown padded to 3.2M snpset	HumanOrigins	..	..	..	592360	M	..	..	..	..	..	..	..	..	..	..	PASS	..
Mordovians4.HO	Mordovians4	..	..	2014	LazaridisNature2014	Modern	0	0	present	..	Mordovian.HO	Saransk_in_Republic_of_Mordova	Russia	54.1833	45.1833	1240K pulldown padded to 3.2M snpset	HumanOrigins	..	..	..	592324	M	..	..	..	..	..	..	..	..	..	..	PASS	..
Mordovians31.HO	Mordovians31	..	..	2014	LazaridisNature2014	Modern	0	0	present	..	Mordovian.HO	Saransk_in_Republic_of_Mordova	Russia	54.1833	45.1833	1240K pulldown padded to 3.2M snpset	HumanOrigins	..	..	..	591750	M	..	..	..	..	..	..	..	..	..	..	PASS	..
bel110c.HO	bel110c	..	..	2014	LazaridisNature2014	Modern	0	0	present	..	Belarusian.HO	Vitebsk, Senno, Shumilino, Glubokoe, Dubrovno, Slutsk, Cherven, Kobrin	Belarus	53.9199	28.0119	1240K pulldown padded to 3.2M snpset	HumanOrigins	..	..	..	591838	M	..	..	..	..	..	..	..	..	..	..	PASS	..
UkrBel736.HO	UkrBel736	..	..	2014	LazaridisNature2014	Modern	0	0	present	..	Ukrainian.HO	Belgorod	Russia	50.2871	31.5574	1240K pulldown padded to 3.2M snpset	HumanOrigins	..	..	..	592367	F	..	n/a (female)	n/a (female)	..	..	..	..	..	..	..	PASS	..
Est358.HO	Est358	..	..	2014	LazaridisNature2014	Modern	0	0	present	..	Estonian.HO	Parnu, Avinurme, Viljandi, Talinn	Estonia	58.539	24.8893	1240K pulldown padded to 3.2M snpset	HumanOrigins	..	..	..	592175	M	..	..	..	..	..	..	..	..	..	..	PASS	..
Mordovians17.HO	Mordovians17	..	..	2014	LazaridisNature2014	Modern	0	0	present	..	Mordovian.HO	Saransk_in_Republic_of_Mordova	Russia	54.1833	45.1833	1240K pulldown padded to 3.2M snpset	HumanOrigins	..	..	..	592252	M	..	..	..	..	..	..	..	..	..	..	PASS	..
Mordovians1.HO	Mordovians1	..	..	2014	LazaridisNature2014	Modern	0	0	present	..	Mordovian.HO	Saransk_in_Republic_of_Mordova	Russia	54.1833	45.1833	1240K pulldown padded to 3.2M snpset	HumanOrigins	..	..	..	592148	M	..	..	..	..	..	..	..	..	..	..	PASS	..
bel8s.HO	bel8s	..	..	2014	LazaridisNature2014	Modern	0	0	present	..	Belarusian.HO	Vitebsk, Senno, Shumilino, Glubokoe, Dubrovno, Slutsk, Cherven, Kobrin	Belarus	53.9199	28.0119	1240K pulldown padded to 3.2M snpset	HumanOrigins	..	..	..	591442	M	..	..	..	..	..	..	..	..	..	..	PASS	..
belarusian23vp.HO	belarusian23vp	..	..	2014	LazaridisNature2014	Modern	0	0	present	..	Belarusian.HO	Vitebsk, Senno, Shumilino, Glubokoe, Dubrovno, Slutsk, Cherven, Kobrin	Belarus	53.9199	28.0119	1240K pulldown padded to 3.2M snpset	HumanOrigins	..	..	..	591982	M	..	..	..	..	..	..	..	..	..	..	PASS	..
Est400.HO	Est400	..	..	2014	LazaridisNature2014	Modern	0	0	present	..	Estonian.HO	Parnu, Avinurme, Viljandi, Talinn	Estonia	58.539	24.8893	1240K pulldown padded to 3.2M snpset	HumanOrigins	..	..	..	591966	M	..	..	..	..	..	..	..	..	..	..	PASS	..
Mordovians22.HO	Mordovians22	..	..	2014	LazaridisNature2014	Modern	0	0	present	..	Mordovian.HO	Saransk_in_Republic_of_Mordova	Russia	54.1833	45.1833	1240K pulldown padded to 3.2M snpset	HumanOrigins	..	..	..	592600	M	..	..	..	..	..	..	..	..	..	..	PASS	..
bel23s.HO	bel23s	..	..	2014	LazaridisNature2014	Modern	0	0	present	..	Belarusian.HO	Vitebsk, Senno, Shumilino, Glubokoe, Dubrovno, Slutsk, Cherven, Kobrin	Belarus	53.9199	28.0119	1240K pulldown padded to 3.2M snpset	HumanOrigins	..	..	..	590697	M	..	..	..	..	..	..	..	..	..	..	PASS	..
belarusian47zp.HO	belarusian47zp	..	..	2014	LazaridisNature2014	Modern	0	0	present	..	Belarusian.HO	Vitebsk, Senno, Shumilino, Glubokoe, Dubrovno, Slutsk, Cherven, Kobrin	Belarus	53.9199	28.0119	1240K pulldown padded to 3.2M snpset	HumanOrigins	..	..	..	591715	M	..	..	..	..	..	..	..	..	..	..	PASS	..
UkrLv228.HO	UkrLv228	..	..	2014	LazaridisNature2014	Modern	0	0	present	..	Ukrainian.HO	Lviv	Ukraine	49.85	24.0167	1240K pulldown padded to 3.2M snpset	HumanOrigins	..	..	..	591740	M	..	..	..	..	..	..	..	..	..	..	PASS	..
Est397.HO	Est397	..	..	2014	LazaridisNature2014	Modern	0	0	present	..	Estonian.HO	Parnu, Avinurme, Viljandi, Talinn	Estonia	58.539	24.8893	1240K pulldown padded to 3.2M snpset	HumanOrigins	..	..	..	592472	M	..	..	..	..	..	..	..	..	..	..	PASS	..
Mordovians32.HO	Mordovians32	..	..	2014	LazaridisNature2014	Modern	0	0	present	..	Mordovian.HO	Saransk_in_Republic_of_Mordova	Russia	54.1833	45.1833	1240K pulldown padded to 3.2M snpset	HumanOrigins	..	..	..	592640	M	..	..	..	..	..	..	..	..	..	..	PASS	..
bel82s.HO	bel82s	..	..	2014	LazaridisNature2014	Modern	0	0	present	..	Belarusian.HO	Vitebsk, Senno, Shumilino, Glubokoe, Dubrovno, Slutsk, Cherven, Kobrin	Belarus	53.9199	28.0119	1240K pulldown padded to 3.2M snpset	HumanOrigins	..	..	..	592135	M	..	..	..	..	..	..	..	..	..	..	PASS	..
UkrBel614.HO	UkrBel614	..	..	2014	LazaridisNature2014	Modern	0	0	present	..	Ukrainian.HO	Belgorod	Russia	50.2871	31.5574	1240K pulldown padded to 3.2M snpset	HumanOrigins	..	..	..	590593	M	..	..	..	..	..	..	..	..	..	..	PASS	..
UkrLv237.HO	UkrLv237	..	..	2014	LazaridisNature2014	Modern	0	0	present	..	Ukrainian.HO	Lviv	Ukraine	49.85	24.0167	1240K pulldown padded to 3.2M snpset	HumanOrigins	..	..	..	592065	M	..	..	..	..	..	..	..	..	..	..	PASS	..
Est394.HO	Est394	..	..	2014	LazaridisNature2014	Modern	0	0	present	..	Estonian.HO	Parnu, Avinurme, Viljandi, Talinn	Estonia	58.539	24.8893	1240K pulldown padded to 3.2M snpset	HumanOrigins	..	..	..	592298	M	..	..	..	..	..	..	..	..	..	..	PASS	..
Mordovians5.HO	Mordovians5	..	..	2014	LazaridisNature2014	Modern	0	0	present	..	Mordovian.HO	Saransk_in_Republic_of_Mordova	Russia	54.1833	45.1833	1240K pulldown padded to 3.2M snpset	HumanOrigins	..	..	..	591645	M	..	..	..	..	..	..	..	..	..	..	PASS	..
saudi1403.HO	saudi1403	..	..	2014	LazaridisNature2014	Modern	0	0	present	..	Saudi.HO	migrants_collected_in_Kuwait	Saudi Arabia	18.49	42.5171	1240K pulldown padded to 3.2M snpset	HumanOrigins	..	..	..	592303	M	..	..	..	..	..	..	..	..	..	..	PASS	..
NA15202.HO	NA15202	..	..	2014	LazaridisNature2014	Modern	0	0	present	..	Hungarian.HO	..	Hungary	47.5	19.1	1240K pulldown padded to 3.2M snpset	HumanOrigins	..	..	..	592104	M	..	..	..	..	..	..	..	..	..	..	PASS	..
NA15725.HO	NA15725	..	..	2014	LazaridisNature2014	Modern	0	0	present	..	Czech.HO	Pre-1989	Czechoslovakia	50.1	14.4	1240K pulldown padded to 3.2M snpset	HumanOrigins	..	..	..	591974	M	..	..	..	..	..	..	..	..	..	..	PASS	..
NA15733.HO	NA15733	..	..	2014	LazaridisNature2014	Modern	0	0	present	..	Czech.HO	Pre-1989	Czechoslovakia	50.1	14.4	1240K pulldown padded to 3.2M snpset	HumanOrigins	..	..	..	591895	F	..	n/a (female)	n/a (female)	..	..	..	..	..	..	..	PASS	..
NA15762.HO	NA15762	..	..	2014	LazaridisNature2014	Modern	0	0	present	..	Icelandic.HO	..	Iceland	64.1333	-21.9333	1240K pulldown padded to 3.2M snpset	HumanOrigins	..	..	..	591403	F	..	n/a (female)	n/a (female)	..	..	..	..	..	..	..	PASS	..
NA17373.HO	NA17373	..	..	2014	LazaridisNature2014	Modern	0	0	present	..	Greek.HO	..	Greece	37.9667	23.7167	1240K pulldown padded to 3.2M snpset	HumanOrigins	..	..	..	591257	F	..	n/a (female)	n/a (female)	..	..	..	..	..	..	..	PASS	..
NA15203.HO	NA15203	..	..	2014	LazaridisNature2014	Modern	0	0	present	..	Hungarian.HO	..	Hungary	47.5	19.1	1240K pulldown padded to 3.2M snpset	HumanOrigins	..	..	..	592411	F	..	n/a (female)	n/a (female)	..	..	..	..	..	..	..	PASS	..
NA15726.HO	NA15726	..	..	2014	LazaridisNature2014	Modern	0	0	present	..	Czech.HO	Pre-1989	Czechoslovakia	50.1	14.4	1240K pulldown padded to 3.2M snpset	HumanOrigins	..	..	..	591747	M	..	..	..	..	..	..	..	..	..	..	PASS	..
NA15755.HO	NA15755	..	..	2014	LazaridisNature2014	Modern	0	0	present	..	Icelandic.HO	..	Iceland	64.1333	-21.9333	1240K pulldown padded to 3.2M snpset	HumanOrigins	..	..	..	592281	M	..	..	..	..	..	..	..	..	..	..	PASS	..
NA15763.HO	NA15763	..	..	2014	LazaridisNature2014	Modern	0	0	present	..	Icelandic.HO	..	Iceland	64.1333	-21.9333	1240K pulldown padded to 3.2M snpset	HumanOrigins	..	..	..	591516	F	..	n/a (female)	n/a (female)	..	..	..	..	..	..	..	PASS	..
NA17374.HO	NA17374	..	..	2014	LazaridisNature2014	Modern	0	0	present	..	Greek.HO	..	Greece	37.9667	23.7167	1240K pulldown padded to 3.2M snpset	HumanOrigins	..	..	..	592128	M	..	..	..	..	..	..	..	..	..	..	PASS	..
NA15204.HO	NA15204	..	..	2014	LazaridisNature2014	Modern	0	0	present	..	Hungarian.HO	..	Hungary	47.5	19.1	1240K pulldown padded to 3.2M snpset	HumanOrigins	..	..	..	592356	F	..	n/a (female)	n/a (female)	..	..	..	..	..	..	..	PASS	..
NA15727.HO	NA15727	..	..	2014	LazaridisNature2014	Modern	0	0	present	..	Czech.HO	Pre-1989	Czechoslovakia	50.1	14.4	1240K pulldown padded to 3.2M snpset	HumanOrigins	..	..	..	591922	M	..	..	..	..	..	..	..	..	..	..	PASS	..
NA15756.HO	NA15756	..	..	2014	LazaridisNature2014	Modern	0	0	present	..	Icelandic.HO	..	Iceland	64.1333	-21.9333	1240K pulldown padded to 3.2M snpset	HumanOrigins	..	..	..	591975	M	..	..	..	..	..	..	..	..	..	..	PASS	..
NA15764.HO	NA15764	..	..	2014	LazaridisNature2014	Modern	0	0	present	..	Icelandic.HO	..	Iceland	64.1333	-21.9333	1240K pulldown padded to 3.2M snpset	HumanOrigins	..	..	..	591689	F	..	n/a (female)	n/a (female)	..	..	..	..	..	..	..	PASS	..
NA17375.HO	NA17375	..	..	2014	LazaridisNature2014	Modern	0	0	present	..	Greek.HO	..	Greece	37.9667	23.7167	1240K pulldown padded to 3.2M snpset	HumanOrigins	..	..	..	592083	F	..	n/a (female)	n/a (female)	..	..	..	..	..	..	..	PASS	..
NA15205.HO	NA15205	..	..	2014	LazaridisNature2014	Modern	0	0	present	..	Hungarian.HO	..	Hungary	47.5	19.1	1240K pulldown padded to 3.2M snpset	HumanOrigins	..	..	..	592029	M	..	..	..	..	..	..	..	..	..	..	PASS	..
NA15728.HO	NA15728	..	..	2014	LazaridisNature2014	Modern	0	0	present	..	Czech.HO	Pre-1989	Czechoslovakia	50.1	14.4	1240K pulldown padded to 3.2M snpset	HumanOrigins	..	..	..	591435	M	..	..	..	..	..	..	..	..	..	..	PASS	..
NA15757.HO	NA15757	..	..	2014	LazaridisNature2014	Modern	0	0	present	..	Icelandic.HO	..	Iceland	64.1333	-21.9333	1240K pulldown padded to 3.2M snpset	HumanOrigins	..	..	..	592152	M	..	..	..	..	..	..	..	..	..	..	PASS	..
NA15765.HO	NA15765	..	..	2014	LazaridisNature2014	Modern	0	0	present	..	Icelandic.HO	..	Iceland	64.1333	-21.9333	1240K pulldown padded to 3.2M snpset	HumanOrigins	..	..	..	591639	F	..	n/a (female)	n/a (female)	..	..	..	..	..	..	..	PASS	..
NA17376.HO	NA17376	..	..	2014	LazaridisNature2014	Modern	0	0	present	..	Greek.HO	..	Greece	37.9667	23.7167	1240K pulldown padded to 3.2M snpset	HumanOrigins	..	..	..	591903	M	..	..	..	..	..	..	..	..	..	..	PASS	..
NA13626.HO	NA13626	..	..	2012	PattersonGenetics2012	Modern	0	0	present	..	Adygei.HO	Krasnodar, Caucasus	Russia	44	39	1240K pulldown padded to 3.2M snpset	HumanOrigins	..	..	..	591622	M	..	..	..	..	..	..	..	..	..	..	PASS	..
NA15206.HO	NA15206	..	..	2014	LazaridisNature2014	Modern	0	0	present	..	Hungarian.HO	..	Hungary	47.5	19.1	1240K pulldown padded to 3.2M snpset	HumanOrigins	..	..	..	591964	M	..	..	..	..	..	..	..	..	..	..	PASS	..
NA15729.HO	NA15729	..	..	2014	LazaridisNature2014	Modern	0	0	present	..	Czech.HO	Pre-1989	Czechoslovakia	50.1	14.4	1240K pulldown padded to 3.2M snpset	HumanOrigins	..	..	..	592440	F	..	n/a (female)	n/a (female)	..	..	..	..	..	..	..	PASS	..
NA15758.HO	NA15758	..	..	2014	LazaridisNature2014	Modern	0	0	present	..	Icelandic.HO	..	Iceland	64.1333	-21.9333	1240K pulldown padded to 3.2M snpset	HumanOrigins	..	..	..	592327	M	..	..	..	..	..	..	..	..	..	..	PASS	..
NA15766.HO	NA15766	..	..	2014	LazaridisNature2014	Modern	0	0	present	..	Icelandic.HO	..	Iceland	64.1333	-21.9333	1240K pulldown padded to 3.2M snpset	HumanOrigins	..	..	..	592044	F	..	n/a (female)	n/a (female)	..	..	..	..	..	..	..	PASS	..
NA17377.HO	NA17377	..	..	2014	LazaridisNature2014	Modern	0	0	present	..	Greek.HO	..	Greece	37.9667	23.7167	1240K pulldown padded to 3.2M snpset	HumanOrigins	..	..	..	592359	M	..	..	..	..	..	..	..	..	..	..	PASS	..
NA15199.HO	NA15199	..	..	2014	LazaridisNature2014	Modern	0	0	present	..	Hungarian.HO	..	Hungary	47.5	19.1	1240K pulldown padded to 3.2M snpset	HumanOrigins	..	..	..	591414	F	..	n/a (female)	n/a (female)	..	..	..	..	..	..	..	PASS	..
NA15207.HO	NA15207	..	..	2014	LazaridisNature2014	Modern	0	0	present	..	Hungarian.HO	..	Hungary	47.5	19.1	1240K pulldown padded to 3.2M snpset	HumanOrigins	..	..	..	592164	F	..	n/a (female)	n/a (female)	..	..	..	..	..	..	..	PASS	..
NA15730.HO	NA15730	..	..	2014	LazaridisNature2014	Modern	0	0	present	..	Czech.HO	Pre-1989	Czechoslovakia	50.1	14.4	1240K pulldown padded to 3.2M snpset	HumanOrigins	..	..	..	592283	F	..	n/a (female)	n/a (female)	..	..	..	..	..	..	..	PASS	..
NA15759.HO	NA15759	..	..	2014	LazaridisNature2014	Modern	0	0	present	..	Icelandic.HO	..	Iceland	64.1333	-21.9333	1240K pulldown padded to 3.2M snpset	HumanOrigins	..	..	..	592386	M	..	..	..	..	..	..	..	..	..	..	PASS	..
NA15200.HO	NA15200	..	..	2014	LazaridisNature2014	Modern	0	0	present	..	Hungarian.HO	..	Hungary	47.5	19.1	1240K pulldown padded to 3.2M snpset	HumanOrigins	..	..	..	591539	M	..	..	..	..	..	..	..	..	..	..	PASS	..
NA15208.HO	NA15208	..	..	2014	LazaridisNature2014	Modern	0	0	present	..	Hungarian.HO	..	Hungary	47.5	19.1	1240K pulldown padded to 3.2M snpset	HumanOrigins	..	..	..	592200	M	..	..	..	..	..	..	..	..	..	..	PASS	..
NA15731.HO	NA15731	..	..	2014	LazaridisNature2014	Modern	0	0	present	..	Czech.HO	Pre-1989	Czechoslovakia	50.1	14.4	1240K pulldown padded to 3.2M snpset	HumanOrigins	..	..	..	592093	F	..	n/a (female)	n/a (female)	..	..	..	..	..	..	..	PASS	..
NA15760.HO	NA15760	..	..	2014	LazaridisNature2014	Modern	0	0	present	..	Icelandic.HO	..	Iceland	64.1333	-21.9333	1240K pulldown padded to 3.2M snpset	HumanOrigins	..	..	..	591733	M	..	..	..	..	..	..	..	..	..	..	PASS	..
NA15201.HO	NA15201	..	..	2014	LazaridisNature2014	Modern	0	0	present	..	Hungarian.HO	..	Hungary	47.5	19.1	1240K pulldown padded to 3.2M snpset	HumanOrigins	..	..	..	591619	F	..	n/a (female)	n/a (female)	..	..	..	..	..	..	..	PASS	..
NA15724.HO	NA15724	..	..	2014	LazaridisNature2014	Modern	0	0	present	..	Czech.HO	Pre-1989	Czechoslovakia	50.1	14.4	1240K pulldown padded to 3.2M snpset	HumanOrigins	..	..	..	591875	M	..	..	..	..	..	..	..	..	..	..	PASS	..
NA15732.HO	NA15732	..	..	2014	LazaridisNature2014	Modern	0	0	present	..	Czech.HO	Pre-1989	Czechoslovakia	50.1	14.4	1240K pulldown padded to 3.2M snpset	HumanOrigins	..	..	..	592145	F	..	n/a (female)	n/a (female)	..	..	..	..	..	..	..	PASS	..
NA15761.HO	NA15761	..	..	2014	LazaridisNature2014	Modern	0	0	present	..	Icelandic.HO	..	Iceland	64.1333	-21.9333	1240K pulldown padded to 3.2M snpset	HumanOrigins	..	..	..	592236	F	..	n/a (female)	n/a (female)	..	..	..	..	..	..	..	PASS	..
NA17372.HO	NA17372	..	..	2014	LazaridisNature2014	Modern	0	0	present	..	Greek.HO	..	Greece	37.9667	23.7167	1240K pulldown padded to 3.2M snpset	HumanOrigins	..	..	..	592337	F	..	n/a (female)	n/a (female)	..	..	..	..	..	..	..	PASS	..
HG00103.HO	HG00103	..	..	2014	LazaridisNature2014	Modern	0	0	present	..	Scottish.HO	Argyll and Bute	United Kingdom	56.04	-5.44	1240K pulldown padded to 3.2M snpset	HumanOrigins	..	..	..	590953	M	..	..	..	..	..	..	..	..	..	..	PASS	..
HG00104.HO	HG00104	..	..	2014	LazaridisNature2014	Modern	0	0	present	..	Scottish.HO	Argyll and Bute	United Kingdom	56.04	-4.44	1240K pulldown padded to 3.2M snpset	HumanOrigins	..	..	..	592028	F	..	n/a (female)	n/a (female)	..	..	..	..	..	..	..	PASS	..
HG00105.HO	HG00105	..	..	2014	LazaridisNature2014	Modern	0	0	present	..	Scottish.HO	Argyll and Bute	United Kingdom	56.04	-3.44	1240K pulldown padded to 3.2M snpset	HumanOrigins	..	..	..	592035	M	..	..	..	..	..	..	..	..	..	..	PASS	..
HG00106.HO	HG00106	..	..	2014	LazaridisNature2014	Modern	0	0	present	..	Scottish.HO	Argyll and Bute	United Kingdom	56.04	-2.44	1240K pulldown padded to 3.2M snpset	HumanOrigins	..	..	..	592373	F	..	n/a (female)	n/a (female)	..	..	..	..	..	..	..	PASS	..
HG00128.HO	HG00128	..	..	2014	LazaridisNature2014	Modern	0	0	present	..	English.HO	Kent	United Kingdom	51.19	0.73	1240K pulldown padded to 3.2M snpset	HumanOrigins	..	..	..	592340	F	..	n/a (female)	n/a (female)	..	..	..	..	..	..	..	PASS	..
HG00129.HO	HG00129	..	..	2014	LazaridisNature2014	Modern	0	0	present	..	English.HO	Kent	United Kingdom	51.19	0.73	1240K pulldown padded to 3.2M snpset	HumanOrigins	..	..	..	591640	M	..	..	..	..	..	..	..	..	..	..	PASS	..
HG00130.HO	HG00130	..	..	2014	LazaridisNature2014	Modern	0	0	present	..	English.HO	Kent	United Kingdom	51.19	0.73	1240K pulldown padded to 3.2M snpset	HumanOrigins	..	..	..	592430	F	..	n/a (female)	n/a (female)	..	..	..	..	..	..	..	PASS	..
HG00131.HO	HG00131	..	..	2014	LazaridisNature2014	Modern	0	0	present	..	English.HO	Kent	United Kingdom	51.19	0.73	1240K pulldown padded to 3.2M snpset	HumanOrigins	..	..	..	591923	M	..	..	..	..	..	..	..	..	..	..	PASS	..
HG00233.HO	HG00233	..	..	2014	LazaridisNature2014	Modern	0	0	present	..	English.HO	Cornwall	United Kingdom	50.3	-4.9	1240K pulldown padded to 3.2M snpset	HumanOrigins	..	..	..	592448	F	..	n/a (female)	n/a (female)	..	..	..	..	..	..	..	PASS	..
HG00234.HO	HG00234	..	..	2014	LazaridisNature2014	Modern	0	0	present	..	English.HO	Cornwall	United Kingdom	50.3	-4.9	1240K pulldown padded to 3.2M snpset	HumanOrigins	..	..	..	592076	M	..	..	..	..	..	..	..	..	..	..	PASS	..
HG00232.HO	HG00232	..	..	2014	LazaridisNature2014	Modern	0	0	present	..	English.HO	Cornwall	United Kingdom	50.3	-4.9	1240K pulldown padded to 3.2M snpset	HumanOrigins	..	..	..	592310	F	..	n/a (female)	n/a (female)	..	..	..	..	..	..	..	PASS	..
HG01500.HO	HG01500	..	..	2014	LazaridisNature2014	Modern	0	0	present	..	Spanish.HO	Castilla_y_Leon	Spain	41.4	-4.5	1240K pulldown padded to 3.2M snpset	HumanOrigins	..	..	..	592160	M	..	..	..	..	..	..	..	..	..	..	PASS	..
HG01501.HO	HG01501	..	..	2014	LazaridisNature2014	Modern	0	0	present	..	Spanish.HO	Castilla_y_Leon	Spain	41.4	-4.5	1240K pulldown padded to 3.2M snpset	HumanOrigins	..	..	..	592137	F	..	n/a (female)	n/a (female)	..	..	..	..	..	..	..	PASS	..
HG01503.HO	HG01503	..	..	2014	LazaridisNature2014	Modern	0	0	present	..	Spanish.HO	Castilla_la_Mancha	Spain	39.9	-4	1240K pulldown padded to 3.2M snpset	HumanOrigins	..	..	..	591827	M	..	..	..	..	..	..	..	..	..	..	PASS	..
HG01504.HO	HG01504	..	..	2014	LazaridisNature2014	Modern	0	0	present	..	Spanish.HO	Castilla_la_Mancha	Spain	39.9	-4	1240K pulldown padded to 3.2M snpset	HumanOrigins	..	..	..	592309	F	..	n/a (female)	n/a (female)	..	..	..	..	..	..	..	PASS	..
HG01506.HO	HG01506	..	..	2014	LazaridisNature2014	Modern	0	0	present	..	Spanish.HO	Castilla_y_Leon	Spain	41.4	-4.5	1240K pulldown padded to 3.2M snpset	HumanOrigins	..	..	..	592343	M	..	..	..	..	..	..	..	..	..	..	PASS	..
HG01507.HO	HG01507	..	..	2014	LazaridisNature2014	Modern	0	0	present	..	Spanish.HO	Castilla_y_Leon	Spain	41.4	-4.5	1240K pulldown padded to 3.2M snpset	HumanOrigins	..	..	..	592464	F	..	n/a (female)	n/a (female)	..	..	..	..	..	..	..	PASS	..
HG01509.HO	HG01509	..	..	2014	LazaridisNature2014	Modern	0	0	present	..	Spanish.HO	Extremadura	Spain	39	-6	1240K pulldown padded to 3.2M snpset	HumanOrigins	..	..	..	592157	M	..	..	..	..	..	..	..	..	..	..	PASS	..
HG01510.HO	HG01510	..	..	2014	LazaridisNature2014	Modern	0	0	present	..	Spanish.HO	Extremadura	Spain	39	-6	1240K pulldown padded to 3.2M snpset	HumanOrigins	..	..	..	591890	F	..	n/a (female)	n/a (female)	..	..	..	..	..	..	..	PASS	..
HG01512.HO	HG01512	..	..	2014	LazaridisNature2014	Modern	0	0	present	..	Spanish.HO	Cantabria	Spain	43.3	-4	1240K pulldown padded to 3.2M snpset	HumanOrigins	..	..	..	592433	M	..	..	..	..	..	..	..	..	..	..	PASS	..
HG01513.HO	HG01513	..	..	2014	LazaridisNature2014	Modern	0	0	present	..	Spanish.HO	Cantabria	Spain	43.3	-4	1240K pulldown padded to 3.2M snpset	HumanOrigins	..	..	..	592059	F	..	n/a (female)	n/a (female)	..	..	..	..	..	..	..	PASS	..
HG01515.HO	HG01515	..	..	2014	LazaridisNature2014	Modern	0	0	present	..	Spanish_North.HO	Pais Vasco	Spain	42.8	-2.7	1240K pulldown padded to 3.2M snpset	HumanOrigins	..	..	..	591761	M	..	..	..	..	..	..	..	..	..	..	PASS	..
HG01516.HO	HG01516	..	..	2014	LazaridisNature2014	Modern	0	0	present	..	Spanish_North.HO	Pais Vasco	Spain	42.8	-2.7	1240K pulldown padded to 3.2M snpset	HumanOrigins	..	..	..	592237	F	..	n/a (female)	n/a (female)	..	..	..	..	..	..	..	PASS	..
HG01518.HO	HG01518	..	..	2014	LazaridisNature2014	Modern	0	0	present	..	Spanish_North.HO	Pais Vasco	Spain	42.8	-2.7	1240K pulldown padded to 3.2M snpset	HumanOrigins	..	..	..	591880	M	..	..	..	..	..	..	..	..	..	..	PASS	..
HG01524.HO	HG01524	..	..	2014	LazaridisNature2014	Modern	0	0	present	..	Spanish.HO	Castilla_y_Leon	Spain	41.4	-4.5	1240K pulldown padded to 3.2M snpset	HumanOrigins	..	..	..	591539	M	..	..	..	..	..	..	..	..	..	..	PASS	..
HG01527.HO	HG01527	..	..	2014	LazaridisNature2014	Modern	0	0	present	..	Spanish.HO	Extremadura	Spain	39	-6	1240K pulldown padded to 3.2M snpset	HumanOrigins	..	..	..	591746	M	..	..	..	..	..	..	..	..	..	..	PASS	..
HG01528.HO	HG01528	..	..	2014	LazaridisNature2014	Modern	0	0	present	..	Spanish.HO	Extremadura	Spain	39	-6	1240K pulldown padded to 3.2M snpset	HumanOrigins	..	..	..	592535	F	..	n/a (female)	n/a (female)	..	..	..	..	..	..	..	PASS	..
HG01530.HO	HG01530	..	..	2014	LazaridisNature2014	Modern	0	0	present	..	Spanish.HO	Extremadura	Spain	39	-6	1240K pulldown padded to 3.2M snpset	HumanOrigins	..	..	..	592509	M	..	..	..	..	..	..	..	..	..	..	PASS	..
HG01536.HO	HG01536	..	..	2014	LazaridisNature2014	Modern	0	0	present	..	Spanish.HO	Catalonia	Spain	41.8	1.5	1240K pulldown padded to 3.2M snpset	HumanOrigins	..	..	..	592134	M	..	..	..	..	..	..	..	..	..	..	PASS	..
HG01537.HO	HG01537	..	..	2014	LazaridisNature2014	Modern	0	0	present	..	Spanish.HO	Catalonia	Spain	41.8	1.5	1240K pulldown padded to 3.2M snpset	HumanOrigins	..	..	..	592503	F	..	n/a (female)	n/a (female)	..	..	..	..	..	..	..	PASS	..
HG01605.HO	HG01605	..	..	2014	LazaridisNature2014	Modern	0	0	present	..	Spanish.HO	Valencian Community, Val√®ncia	Spain	39.5	-0.4	1240K pulldown padded to 3.2M snpset	HumanOrigins	..	..	..	592256	F	..	n/a (female)	n/a (female)	..	..	..	..	..	..	..	PASS	..
HG01606.HO	HG01606	..	..	2014	LazaridisNature2014	Modern	0	0	present	..	Spanish.HO	Valencian Community, Val√®ncia	Spain	39.5	-0.4	1240K pulldown padded to 3.2M snpset	HumanOrigins	..	..	..	592138	M	..	..	..	..	..	..	..	..	..	..	PASS	..
HG01607.HO	HG01607	..	..	2014	LazaridisNature2014	Modern	0	0	present	..	Spanish.HO	Valencian Community, Val√®ncia	Spain	39.5	-0.4	1240K pulldown padded to 3.2M snpset	HumanOrigins	..	..	..	591742	F	..	n/a (female)	n/a (female)	..	..	..	..	..	..	..	PASS	..
HG01608.HO	HG01608	..	..	2014	LazaridisNature2014	Modern	0	0	present	..	Spanish.HO	Valencian Community, Val√®ncia	Spain	39.5	-0.4	1240K pulldown padded to 3.2M snpset	HumanOrigins	..	..	..	592415	M	..	..	..	..	..	..	..	..	..	..	PASS	..
HG01613.HO	HG01613	..	..	2014	LazaridisNature2014	Modern	0	0	present	..	Spanish.HO	Belearic Islands	Spain	39.5	3	1240K pulldown padded to 3.2M snpset	HumanOrigins	..	..	..	592369	F	..	n/a (female)	n/a (female)	..	..	..	..	..	..	..	PASS	..
HG01615.HO	HG01615	..	..	2014	LazaridisNature2014	Modern	0	0	present	..	Spanish.HO	Belearic Islands	Spain	39.5	3	1240K pulldown padded to 3.2M snpset	HumanOrigins	..	..	..	592570	M	..	..	..	..	..	..	..	..	..	..	PASS	..
HG01617.HO	HG01617	..	..	2014	LazaridisNature2014	Modern	0	0	present	..	Spanish.HO	Murcia	Spain	38	-1.1	1240K pulldown padded to 3.2M snpset	HumanOrigins	..	..	..	592621	M	..	..	..	..	..	..	..	..	..	..	PASS	..
HG01618.HO	HG01618	..	..	2014	LazaridisNature2014	Modern	0	0	present	..	Spanish.HO	Murcia	Spain	38	-1.1	1240K pulldown padded to 3.2M snpset	HumanOrigins	..	..	..	592418	F	..	n/a (female)	n/a (female)	..	..	..	..	..	..	..	PASS	..
HG01619.HO	HG01619	..	..	2014	LazaridisNature2014	Modern	0	0	present	..	Spanish.HO	Andalucia	Spain	37.4	-6	1240K pulldown padded to 3.2M snpset	HumanOrigins	..	..	..	592637	M	..	..	..	..	..	..	..	..	..	..	PASS	..
HG01620.HO	HG01620	..	..	2014	LazaridisNature2014	Modern	0	0	present	..	Spanish.HO	Andalucia	Spain	37.4	-6	1240K pulldown padded to 3.2M snpset	HumanOrigins	..	..	..	592654	F	..	n/a (female)	n/a (female)	..	..	..	..	..	..	..	PASS	..
HG01623.HO	HG01623	..	..	2014	LazaridisNature2014	Modern	0	0	present	..	Spanish.HO	Andalucia	Spain	37.4	-6	1240K pulldown padded to 3.2M snpset	HumanOrigins	..	..	..	592463	F	..	n/a (female)	n/a (female)	..	..	..	..	..	..	..	PASS	..
HG01624.HO	HG01624	..	..	2014	LazaridisNature2014	Modern	0	0	present	..	Spanish.HO	Andalucia	Spain	37.4	-6	1240K pulldown padded to 3.2M snpset	HumanOrigins	..	..	..	592377	M	..	..	..	..	..	..	..	..	..	..	PASS	..
HG01625.HO	HG01625	..	..	2014	LazaridisNature2014	Modern	0	0	present	..	Spanish.HO	Belearic Islands	Spain	39.5	3	1240K pulldown padded to 3.2M snpset	HumanOrigins	..	..	..	592334	M	..	..	..	..	..	..	..	..	..	..	PASS	..
HG01626.HO	HG01626	..	..	2014	LazaridisNature2014	Modern	0	0	present	..	Spanish.HO	Belearic Islands	Spain	39.5	3	1240K pulldown padded to 3.2M snpset	HumanOrigins	..	..	..	592233	F	..	n/a (female)	n/a (female)	..	..	..	..	..	..	..	PASS	..
HG00171.HO	HG00171	..	..	2014	LazaridisNature2014	Modern	0	0	present	..	Finnish.HO	..	Finland	60.2	24.9	1240K pulldown padded to 3.2M snpset	HumanOrigins	..	..	..	591820	F	..	n/a (female)	n/a (female)	..	..	..	..	..	..	..	PASS	..
HG00174.HO	HG00174	..	..	2014	LazaridisNature2014	Modern	0	0	present	..	Finnish.HO	..	Finland	60.2	24.9	1240K pulldown padded to 3.2M snpset	HumanOrigins	..	..	..	592371	F	..	n/a (female)	n/a (female)	..	..	..	..	..	..	..	PASS	..
HG00190.HO	HG00190	..	..	2014	LazaridisNature2014	Modern	0	0	present	..	Finnish.HO	..	Finland	60.2	24.9	1240K pulldown padded to 3.2M snpset	HumanOrigins	..	..	..	592556	M	..	..	..	..	..	..	..	..	..	..	PASS	..
HG00266.HO	HG00266	..	..	2014	LazaridisNature2014	Modern	0	0	present	..	Finnish.HO	..	Finland	60.2	24.9	1240K pulldown padded to 3.2M snpset	HumanOrigins	..	..	..	592479	F	..	n/a (female)	n/a (female)	..	..	..	..	..	..	..	PASS	..
HG00231.HO	HG00231	..	..	2014	LazaridisNature2014	Modern	0	0	present	..	English.HO	Cornwall	United Kingdom	50.3	-4.9	1240K pulldown padded to 3.2M snpset	HumanOrigins	..	..	..	592454	F	..	n/a (female)	n/a (female)	..	..	..	..	..	..	..	PASS	..
HG00183.HO	HG00183	..	..	2014	LazaridisNature2014	Modern	0	0	present	..	Finnish.HO	..	Finland	60.2	24.9	1240K pulldown padded to 3.2M snpset	HumanOrigins	..	..	..	592226	M	..	..	..	..	..	..	..	..	..	..	PASS	..
HG00126.HO	HG00126	..	..	2014	LazaridisNature2014	Modern	0	0	present	..	English.HO	Kent	United Kingdom	51.19	0.73	1240K pulldown padded to 3.2M snpset	HumanOrigins	..	..	..	592518	M	..	..	..	..	..	..	..	..	..	..	PASS	..
HG00173.HO	HG00173	..	..	2014	LazaridisNature2014	Modern	0	0	present	..	Finnish.HO	..	Finland	60.2	24.9	1240K pulldown padded to 3.2M snpset	HumanOrigins	..	..	..	592378	F	..	n/a (female)	n/a (female)	..	..	..	..	..	..	..	PASS	..
HG00182.HO	HG00182	..	..	2014	LazaridisNature2014	Modern	0	0	present	..	Finnish.HO	..	Finland	60.2	24.9	1240K pulldown padded to 3.2M snpset	HumanOrigins	..	..	..	592338	M	..	..	..	..	..	..	..	..	..	..	PASS	..
HG01747.HO	HG01747	..	..	2014	LazaridisNature2014	Modern	0	0	present	..	Spanish.HO	Castilla_la_Mancha	Spain	39.9	-4	1240K pulldown padded to 3.2M snpset	HumanOrigins	..	..	..	592157	M	..	..	..	..	..	..	..	..	..	..	PASS	..
HG01746.HO	HG01746	..	..	2014	LazaridisNature2014	Modern	0	0	present	..	Spanish.HO	Castilla_la_Mancha	Spain	39.9	-4	1240K pulldown padded to 3.2M snpset	HumanOrigins	..	..	..	592240	F	..	n/a (female)	n/a (female)	..	..	..	..	..	..	..	PASS	..
HG01675.HO	HG01675	..	..	2014	LazaridisNature2014	Modern	0	0	present	..	Spanish.HO	Aragon	Spain	41	-1	1240K pulldown padded to 3.2M snpset	HumanOrigins	..	..	..	591907	M	..	..	..	..	..	..	..	..	..	..	PASS	..
HG01680.HO	HG01680	..	..	2014	LazaridisNature2014	Modern	0	0	present	..	Spanish.HO	Cantabria	Spain	43.3	-4	1240K pulldown padded to 3.2M snpset	HumanOrigins	..	..	..	592512	M	..	..	..	..	..	..	..	..	..	..	PASS	..
HG01682.HO	HG01682	..	..	2014	LazaridisNature2014	Modern	0	0	present	..	Spanish.HO	Aragon	Spain	41	-1	1240K pulldown padded to 3.2M snpset	HumanOrigins	..	..	..	592690	M	..	..	..	..	..	..	..	..	..	..	PASS	..
HG01700.HO	HG01700	..	..	2014	LazaridisNature2014	Modern	0	0	present	..	Spanish_North.HO	Pais Vasco	Spain	42.8	-2.7	1240K pulldown padded to 3.2M snpset	HumanOrigins	..	..	..	592567	M	..	..	..	..	..	..	..	..	..	..	PASS	..
HG01679.HO	HG01679	..	..	2014	LazaridisNature2014	Modern	0	0	present	..	Spanish.HO	Cantabria	Spain	43.3	-4	1240K pulldown padded to 3.2M snpset	HumanOrigins	..	..	..	592278	F	..	n/a (female)	n/a (female)	..	..	..	..	..	..	..	PASS	..
HG01702.HO	HG01702	..	..	2014	LazaridisNature2014	Modern	0	0	present	..	Spanish_North.HO	Pais Vasco	Spain	42.8	-2.7	1240K pulldown padded to 3.2M snpset	HumanOrigins	..	..	..	592482	F	..	n/a (female)	n/a (female)	..	..	..	..	..	..	..	PASS	..
HG01676.HO	HG01676	..	..	2014	LazaridisNature2014	Modern	0	0	present	..	Spanish.HO	Aragon	Spain	41	-1	1240K pulldown padded to 3.2M snpset	HumanOrigins	..	..	..	592411	F	..	n/a (female)	n/a (female)	..	..	..	..	..	..	..	PASS	..
HG01684.HO	HG01684	..	..	2014	LazaridisNature2014	Modern	0	0	present	..	Spanish.HO	Aragon	Spain	41	-1	1240K pulldown padded to 3.2M snpset	HumanOrigins	..	..	..	592537	F	..	n/a (female)	n/a (female)	..	..	..	..	..	..	..	PASS	..
HG01705.HO	HG01705	..	..	2014	LazaridisNature2014	Modern	0	0	present	..	Spanish.HO	Galicia	Spain	42.5	-8.1	1240K pulldown padded to 3.2M snpset	HumanOrigins	..	..	..	592480	M	..	..	..	..	..	..	..	..	..	..	PASS	..
HG01707.HO	HG01707	..	..	2014	LazaridisNature2014	Modern	0	0	present	..	Spanish.HO	Galicia	Spain	42.5	-8.1	1240K pulldown padded to 3.2M snpset	HumanOrigins	..	..	..	592261	F	..	n/a (female)	n/a (female)	..	..	..	..	..	..	..	PASS	..
HG01685.HO	HG01685	..	..	2014	LazaridisNature2014	Modern	0	0	present	..	Spanish.HO	Galicia	Spain	42.5	-8.1	1240K pulldown padded to 3.2M snpset	HumanOrigins	..	..	..	592293	F	..	n/a (female)	n/a (female)	..	..	..	..	..	..	..	PASS	..
HG01686.HO	HG01686	..	..	2014	LazaridisNature2014	Modern	0	0	present	..	Spanish.HO	Galicia	Spain	42.5	-8.1	1240K pulldown padded to 3.2M snpset	HumanOrigins	..	..	..	592279	M	..	..	..	..	..	..	..	..	..	..	PASS	..
HG01704.HO	HG01704	..	..	2014	LazaridisNature2014	Modern	0	0	present	..	Spanish.HO	Galicia	Spain	42.5	-8.1	1240K pulldown padded to 3.2M snpset	HumanOrigins	..	..	..	591920	F	..	n/a (female)	n/a (female)	..	..	..	..	..	..	..	PASS	..
HG01673.HO	HG01673	..	..	2014	LazaridisNature2014	Modern	0	0	present	..	Spanish.HO	Aragon	Spain	41	-1	1240K pulldown padded to 3.2M snpset	HumanOrigins	..	..	..	592516	F	..	n/a (female)	n/a (female)	..	..	..	..	..	..	..	PASS	..
HG01695.HO	HG01695	..	..	2014	LazaridisNature2014	Modern	0	0	present	..	IBS_CanaryIslands.HO	Canary Islands	Spain	28.1	-15.4	1240K pulldown padded to 3.2M snpset	HumanOrigins	..	..	..	592430	F	..	n/a (female)	n/a (female)	..	..	..	..	..	..	..	PASS	..
HG01694.HO	HG01694	..	..	2014	LazaridisNature2014	Modern	0	0	present	..	IBS_CanaryIslands.HO	Canary Islands	Spain	28.1	-15.4	1240K pulldown padded to 3.2M snpset	HumanOrigins	..	..	..	592482	M	..	..	..	..	..	..	..	..	..	..	PASS	..
HG01761.HO	HG01761	..	..	2014	LazaridisNature2014	Modern	0	0	present	..	Spanish.HO	Catalonia	Spain	41.8	1.5	1240K pulldown padded to 3.2M snpset	HumanOrigins	..	..	..	592698	M	..	..	..	..	..	..	..	..	..	..	PASS	..
HG01770.HO	HG01770	..	..	2014	LazaridisNature2014	Modern	0	0	present	..	Spanish.HO	Cantabria	Spain	43.3	-4	1240K pulldown padded to 3.2M snpset	HumanOrigins	..	..	..	592433	F	..	n/a (female)	n/a (female)	..	..	..	..	..	..	..	PASS	..
HG01762.HO	HG01762	..	..	2014	LazaridisNature2014	Modern	0	0	present	..	Spanish.HO	Catalonia	Spain	41.8	1.5	1240K pulldown padded to 3.2M snpset	HumanOrigins	..	..	..	592272	F	..	n/a (female)	n/a (female)	..	..	..	..	..	..	..	PASS	..
HG01773.HO	HG01773	..	..	2014	LazaridisNature2014	Modern	0	0	present	..	Spanish.HO	Valencian Community, Val√®ncia	Spain	39.5	-0.4	1240K pulldown padded to 3.2M snpset	HumanOrigins	..	..	..	592411	F	..	n/a (female)	n/a (female)	..	..	..	..	..	..	..	PASS	..
HG02220.HO	HG02220	..	..	2014	LazaridisNature2014	Modern	0	0	present	..	Spanish.HO	Catalonia	Spain	41.8	1.5	1240K pulldown padded to 3.2M snpset	HumanOrigins	..	..	..	592200	F	..	n/a (female)	n/a (female)	..	..	..	..	..	..	..	PASS	..
HG02238.HO	HG02238	..	..	2014	LazaridisNature2014	Modern	0	0	present	..	Spanish.HO	Castilla_la_Mancha	Spain	39.9	-4	1240K pulldown padded to 3.2M snpset	HumanOrigins	..	..	..	592510	M	..	..	..	..	..	..	..	..	..	..	PASS	..
HG01678.HO	HG01678	..	..	2014	LazaridisNature2014	Modern	0	0	present	..	Spanish.HO	Aragon	Spain	41	-1	1240K pulldown padded to 3.2M snpset	HumanOrigins	..	..	..	592582	M	..	..	..	..	..	..	..	..	..	..	PASS	..
HG01699.HO	HG01699	..	..	2014	LazaridisNature2014	Modern	0	0	present	..	Spanish.HO	Murcia	Spain	38	-1.1	1240K pulldown padded to 3.2M snpset	HumanOrigins	..	..	..	592552	M	..	..	..	..	..	..	..	..	..	..	PASS	..
HG01697.HO	HG01697	..	..	2014	LazaridisNature2014	Modern	0	0	present	..	Spanish.HO	Murcia	Spain	38	-1.1	1240K pulldown padded to 3.2M snpset	HumanOrigins	..	..	..	592512	F	..	n/a (female)	n/a (female)	..	..	..	..	..	..	..	PASS	..
HG00160.HO	HG00160	..	..	2014	LazaridisNature2014	Modern	0	0	present	..	English.HO	Cornwall	United Kingdom	50.3	-4.9	1240K pulldown padded to 3.2M snpset	HumanOrigins	..	..	..	592509	M	..	..	..	..	..	..	..	..	..	..	PASS	..
LibyanJew1438.HO	LibyanJew1438	..	..	2014	LazaridisNature2014	Modern	0	0	present	..	Jew_Libyan.HO	migrants_collected_in_Israel	Libya	32.9167	13.1833	1240K pulldown padded to 3.2M snpset	HumanOrigins	..	..	..	580085	F	..	n/a (female)	n/a (female)	..	..	..	..	..	..	..	PASS	..
Malta4AM91.HO	Malta4AM91	..	..	2014	LazaridisNature2014	Modern	0	0	present	..	Maltese.HO	La Valetta	Malta	35.94	14.38	1240K pulldown padded to 3.2M snpset	HumanOrigins	..	..	..	578903	M	..	..	..	..	..	..	..	..	..	..	PASS	..
Malta8AM91.HO	Malta8AM91	..	..	2014	LazaridisNature2014	Modern	0	0	present	..	Maltese.HO	La Valetta	Malta	35.94	14.38	1240K pulldown padded to 3.2M snpset	HumanOrigins	..	..	..	580865	M	..	..	..	..	..	..	..	..	..	..	PASS	..
CRO53.HO	CRO53	..	..	2014	LazaridisNature2014	Modern	0	0	present	..	Croatian.HO	Split	Croatia	43.513	16.446	1240K pulldown padded to 3.2M snpset	HumanOrigins	..	..	..	587816	M	..	..	..	..	..	..	..	..	..	..	PASS	..
AshkenaziJew5779.HO	AshkenaziJew5779	..	..	2014	LazaridisNature2014	Modern	0	0	present	..	Jew_Ashkenazi.HO	migrants_collected_in_Israel	Poland	52.2333	21.0167	1240K pulldown padded to 3.2M snpset	HumanOrigins	..	..	..	587910	F	..	n/a (female)	n/a (female)	..	..	..	..	..	..	..	PASS	..
SephardiJewTurkey4955.HO	SephardiJewTurkey4955	..	..	2014	LazaridisNature2014	Modern	0	0	present	..	Jew_Turkish.HO	migrants_collected_in_Israel	Turkey	41.0167	28.95	1240K pulldown padded to 3.2M snpset	HumanOrigins	..	..	..	588318	M	..	..	..	..	..	..	..	..	..	..	PASS	..
NOR119.HO	NOR119	..	..	2014	LazaridisNature2014	Modern	0	0	present	..	Norwegian.HO	Bergen	Norway	60.359	5.358	1240K pulldown padded to 3.2M snpset	HumanOrigins	..	..	..	589216	M	..	..	..	..	..	..	..	..	..	..	PASS	..
NOR124.HO	NOR124	..	..	2014	LazaridisNature2014	Modern	0	0	present	..	Norwegian.HO	Bergen	Norway	60.359	5.358	1240K pulldown padded to 3.2M snpset	HumanOrigins	..	..	..	589405	M	..	..	..	..	..	..	..	..	..	..	PASS	..
CRO103.HO	CRO103	..	..	2014	LazaridisNature2014	Modern	0	0	present	..	Croatian.HO	Split	Croatia	43.513	16.446	1240K pulldown padded to 3.2M snpset	HumanOrigins	..	..	..	589687	M	..	..	..	..	..	..	..	..	..	..	PASS	..
CRO107.HO	CRO107	..	..	2014	LazaridisNature2014	Modern	0	0	present	..	Croatian.HO	Split	Croatia	43.513	16.446	1240K pulldown padded to 3.2M snpset	HumanOrigins	..	..	..	589694	M	..	..	..	..	..	..	..	..	..	..	PASS	..
TunisianJew1421.HO	TunisianJew1421	..	..	2014	LazaridisNature2014	Modern	0	0	present	..	Jew_Tunisian.HO	migrants_collected_in_Israel	Tunisia	36.8	10.1833	1240K pulldown padded to 3.2M snpset	HumanOrigins	..	..	..	589555	F	..	n/a (female)	n/a (female)	..	..	..	..	..	..	..	PASS	..
SephardiJewTurkey5877.HO	SephardiJewTurkey5877	..	..	2014	LazaridisNature2014	Modern	0	0	present	..	Jew_Turkish.HO	migrants_collected_in_Israel	Turkey	41.0167	28.95	1240K pulldown padded to 3.2M snpset	HumanOrigins	..	..	..	589847	F	..	n/a (female)	n/a (female)	..	..	..	..	..	..	..	PASS	..
TP08.HO	TP08	..	..	2014	LazaridisNature2014	Modern	0	0	present	..	Sicilian.HO	Trapani	Italy	38.019	12.515	1240K pulldown padded to 3.2M snpset	HumanOrigins	..	..	..	589894	M	..	..	..	..	..	..	..	..	..	..	PASS	..
GREEKGRALPOP18.HO	GREEKGRALPOP18	..	..	2014	LazaridisNature2014	Modern	0	0	present	..	Greek.HO	Thessaloniki	Greece	40.64	22.94	1240K pulldown padded to 3.2M snpset	HumanOrigins	..	..	..	589370	M	..	..	..	..	..	..	..	..	..	..	PASS	..
AshkenaziJew5782.HO	AshkenaziJew5782	..	..	2014	LazaridisNature2014	Modern	0	0	present	..	Jew_Ashkenazi.HO	migrants_collected_in_Israel	Poland	52.2333	21.0167	1240K pulldown padded to 3.2M snpset	HumanOrigins	..	..	..	590352	M	..	..	..	..	..	..	..	..	..	..	PASS	..
BEL57.HO	BEL57	..	..	2014	LazaridisNature2014	Modern	0	0	present	..	Italian_South.HO	Belvedere (Cosenza)	Italy	39.37	15.52	1240K pulldown padded to 3.2M snpset	HumanOrigins	..	..	..	590284	M	..	..	..	..	..	..	..	..	..	..	PASS	..
BAS35.HO	BAS35	..	..	2014	LazaridisNature2014	Modern	0	0	present	..	Basque.HO	Tolosa	Spain	43.13	-2.08	1240K pulldown padded to 3.2M snpset	HumanOrigins	..	..	..	589247	M	..	..	..	..	..	..	..	..	..	..	PASS	..
SR23.HO	SR23	..	..	2014	LazaridisNature2014	Modern	0	0	present	..	Sicilian.HO	Siracusa	Italy	37.067	15.267	1240K pulldown padded to 3.2M snpset	HumanOrigins	..	..	..	590602	M	..	..	..	..	..	..	..	..	..	..	PASS	..
CRO47.HO	CRO47	..	..	2014	LazaridisNature2014	Modern	0	0	present	..	Croatian.HO	Split	Croatia	43.513	16.446	1240K pulldown padded to 3.2M snpset	HumanOrigins	..	..	..	590716	M	..	..	..	..	..	..	..	..	..	..	PASS	..
NOR106.HO	NOR106	..	..	2014	LazaridisNature2014	Modern	0	0	present	..	Norwegian.HO	Bergen	Norway	60.359	5.358	1240K pulldown padded to 3.2M snpset	HumanOrigins	..	..	..	590785	M	..	..	..	..	..	..	..	..	..	..	PASS	..
CRO41.HO	CRO41	..	..	2014	LazaridisNature2014	Modern	0	0	present	..	Croatian.HO	Split	Croatia	43.513	16.446	1240K pulldown padded to 3.2M snpset	HumanOrigins	..	..	..	590921	M	..	..	..	..	..	..	..	..	..	..	PASS	..
Malta7AM91.HO	Malta7AM91	..	..	2014	LazaridisNature2014	Modern	0	0	present	..	Maltese.HO	La Valetta	Malta	35.94	14.38	1240K pulldown padded to 3.2M snpset	HumanOrigins	..	..	..	589901	M	..	..	..	..	..	..	..	..	..	..	PASS	..
SephardiJewTurkey4953.HO	SephardiJewTurkey4953	..	..	2014	LazaridisNature2014	Modern	0	0	present	..	Jew_Turkish.HO	migrants_collected_in_Israel	Turkey	41.0167	28.95	1240K pulldown padded to 3.2M snpset	HumanOrigins	..	..	..	590946	M	..	..	..	..	..	..	..	..	..	..	PASS	..
SephardiJewTurkey6077.HO	SephardiJewTurkey6077	..	..	2014	LazaridisNature2014	Modern	0	0	present	..	Jew_Turkish.HO	migrants_collected_in_Israel	Turkey	41.0167	28.95	1240K pulldown padded to 3.2M snpset	HumanOrigins	..	..	..	590673	F	..	n/a (female)	n/a (female)	..	..	..	..	..	..	..	PASS	..
NOR101.HO	NOR101	..	..	2014	LazaridisNature2014	Modern	0	0	present	..	Norwegian.HO	Bergen	Norway	60.359	5.358	1240K pulldown padded to 3.2M snpset	HumanOrigins	..	..	..	590887	M	..	..	..	..	..	..	..	..	..	..	PASS	..
SephardiJewTurkey5832.HO	SephardiJewTurkey5832	..	..	2014	LazaridisNature2014	Modern	0	0	present	..	Jew_Turkish.HO	migrants_collected_in_Israel	Turkey	41.0167	28.95	1240K pulldown padded to 3.2M snpset	HumanOrigins	..	..	..	590864	F	..	n/a (female)	n/a (female)	..	..	..	..	..	..	..	PASS	..
YemeniteJew4684.HO	YemeniteJew4684	..	..	2014	LazaridisNature2014	Modern	0	0	present	..	Jew_Yemenite.HO	migrants_collected_in_Israel	Yemen	15.35	44.2	1240K pulldown padded to 3.2M snpset	HumanOrigins	..	..	..	590919	F	..	n/a (female)	n/a (female)	..	..	..	..	..	..	..	PASS	..
TP05.HO	TP05	..	..	2014	LazaridisNature2014	Modern	0	0	present	..	Sicilian.HO	Trapani	Italy	38.019	12.515	1240K pulldown padded to 3.2M snpset	HumanOrigins	..	..	..	591104	M	..	..	..	..	..	..	..	..	..	..	PASS	..
Kayseri24392.HO	Kayseri24392	..	..	2014	LazaridisNature2014	Modern	0	0	present	..	Turkish.HO	Kayseri	Turkey	38.7333	35.4833	1240K pulldown padded to 3.2M snpset	HumanOrigins	..	..	..	590865	M	..	..	..	..	..	..	..	..	..	..	PASS	..
YemeniteJew4695.HO	YemeniteJew4695	..	..	2014	LazaridisNature2014	Modern	0	0	present	..	Jew_Yemenite.HO	migrants_collected_in_Israel	Yemen	15.35	44.2	1240K pulldown padded to 3.2M snpset	HumanOrigins	..	..	..	591038	F	..	n/a (female)	n/a (female)	..	..	..	..	..	..	..	PASS	..
SR60.HO	SR60	..	..	2014	LazaridisNature2014	Modern	0	0	present	..	Sicilian.HO	Siracusa	Italy	37.067	15.267	1240K pulldown padded to 3.2M snpset	HumanOrigins	..	..	..	591041	M	..	..	..	..	..	..	..	..	..	..	PASS	..
NOR146.HO	NOR146	..	..	2014	LazaridisNature2014	Modern	0	0	present	..	Norwegian.HO	Bergen	Norway	60.359	5.358	1240K pulldown padded to 3.2M snpset	HumanOrigins	..	..	..	591114	M	..	..	..	..	..	..	..	..	..	..	PASS	..
TP06.HO	TP06	..	..	2014	LazaridisNature2014	Modern	0	0	present	..	Sicilian.HO	Trapani	Italy	38.019	12.515	1240K pulldown padded to 3.2M snpset	HumanOrigins	..	..	..	591373	M	..	..	..	..	..	..	..	..	..	..	PASS	..
NOR108.HO	NOR108	..	..	2014	LazaridisNature2014	Modern	0	0	present	..	Norwegian.HO	Bergen	Norway	60.359	5.358	1240K pulldown padded to 3.2M snpset	HumanOrigins	..	..	..	591314	M	..	..	..	..	..	..	..	..	..	..	PASS	..
CRO66.HO	CRO66	..	..	2014	LazaridisNature2014	Modern	0	0	present	..	Croatian.HO	Split	Croatia	43.513	16.446	1240K pulldown padded to 3.2M snpset	HumanOrigins	..	..	..	591263	M	..	..	..	..	..	..	..	..	..	..	PASS	..
IranianJew1409.HO	IranianJew1409	..	..	2014	LazaridisNature2014	Modern	0	0	present	..	Jew_Iranian.HO	migrants_collected_in_Israel	Iran	35.7	51.4167	1240K pulldown padded to 3.2M snpset	HumanOrigins	..	..	..	591149	F	..	n/a (female)	n/a (female)	..	..	..	..	..	..	..	PASS	..
NOR126.HO	NOR126	..	..	2014	LazaridisNature2014	Modern	0	0	present	..	Norwegian.HO	Bergen	Norway	60.359	5.358	1240K pulldown padded to 3.2M snpset	HumanOrigins	..	..	..	591263	M	..	..	..	..	..	..	..	..	..	..	PASS	..
SephardiJewTurkey5075.HO	SephardiJewTurkey5075	..	..	2014	LazaridisNature2014	Modern	0	0	present	..	Jew_Turkish.HO	migrants_collected_in_Israel	Turkey	41.0167	28.95	1240K pulldown padded to 3.2M snpset	HumanOrigins	..	..	..	591289	M	..	..	..	..	..	..	..	..	..	..	PASS	..
GREEKGRALPOP13.HO	GREEKGRALPOP13	..	..	2014	LazaridisNature2014	Modern	0	0	present	..	Greek.HO	Thessaloniki	Greece	40.64	22.94	1240K pulldown padded to 3.2M snpset	HumanOrigins	..	..	..	591041	M	..	..	..	..	..	..	..	..	..	..	PASS	..
TP07.HO	TP07	..	..	2014	LazaridisNature2014	Modern	0	0	present	..	Sicilian.HO	Trapani	Italy	38.019	12.515	1240K pulldown padded to 3.2M snpset	HumanOrigins	..	..	..	591434	M	..	..	..	..	..	..	..	..	..	..	PASS	..
BAS31.HO	BAS31	..	..	2014	LazaridisNature2014	Modern	0	0	present	..	Basque.HO	Tolosa	Spain	43.13	-2.08	1240K pulldown padded to 3.2M snpset	HumanOrigins	..	..	..	591075	F	..	n/a (female)	n/a (female)	..	..	..	..	..	..	..	PASS	..
ALB191.HO	ALB191	..	..	2014	LazaridisNature2014	Modern	0	0	present	..	Albanian.HO	Tirana	Albania	41.33	19.83	1240K pulldown padded to 3.2M snpset	HumanOrigins	..	..	..	590447	F	..	n/a (female)	n/a (female)	..	..	..	..	..	..	..	PASS	..
GREEKGRALPOP15.HO	GREEKGRALPOP15	..	..	2014	LazaridisNature2014	Modern	0	0	present	..	Greek.HO	Thessaloniki	Greece	40.64	22.94	1240K pulldown padded to 3.2M snpset	HumanOrigins	..	..	..	590969	M	..	..	..	..	..	..	..	..	..	..	PASS	..
SephardiJewTurkey4950.HO	SephardiJewTurkey4950	..	..	2014	LazaridisNature2014	Modern	0	0	present	..	Jew_Turkish.HO	migrants_collected_in_Israel	Turkey	41.0167	28.95	1240K pulldown padded to 3.2M snpset	HumanOrigins	..	..	..	591463	M	..	..	..	..	..	..	..	..	..	..	PASS	..
NOR107.HO	NOR107	..	..	2014	LazaridisNature2014	Modern	0	0	present	..	Norwegian.HO	Bergen	Norway	60.359	5.358	1240K pulldown padded to 3.2M snpset	HumanOrigins	..	..	..	591490	M	..	..	..	..	..	..	..	..	..	..	PASS	..
SephardiJewTurkey5033.HO	SephardiJewTurkey5033	..	..	2014	LazaridisNature2014	Modern	0	0	present	..	Jew_Turkish.HO	migrants_collected_in_Israel	Turkey	41.0167	28.95	1240K pulldown padded to 3.2M snpset	HumanOrigins	..	..	..	591532	M	..	..	..	..	..	..	..	..	..	..	PASS	..
GREEKGRALPOP5.HO	GREEKGRALPOP5	..	..	2014	LazaridisNature2014	Modern	0	0	present	..	Greek.HO	Thessaloniki	Greece	40.64	22.94	1240K pulldown padded to 3.2M snpset	HumanOrigins	..	..	..	591076	M	..	..	..	..	..	..	..	..	..	..	PASS	..
YemeniteJew4675.HO	YemeniteJew4675	..	..	2014	LazaridisNature2014	Modern	0	0	present	..	Jew_Yemenite.HO	migrants_collected_in_Israel	Yemen	15.35	44.2	1240K pulldown padded to 3.2M snpset	HumanOrigins	..	..	..	591538	F	..	n/a (female)	n/a (female)	..	..	..	..	..	..	..	PASS	..
CRO153.HO	CRO153	..	..	2014	LazaridisNature2014	Modern	0	0	present	..	Croatian.HO	Split	Croatia	43.513	16.446	1240K pulldown padded to 3.2M snpset	HumanOrigins	..	..	..	591599	M	..	..	..	..	..	..	..	..	..	..	PASS	..
NOR109.HO	NOR109	..	..	2014	LazaridisNature2014	Modern	0	0	present	..	Norwegian.HO	Bergen	Norway	60.359	5.358	1240K pulldown padded to 3.2M snpset	HumanOrigins	..	..	..	591522	M	..	..	..	..	..	..	..	..	..	..	PASS	..
SouthFrench3326.HO	SouthFrench3326	..	..	2014	LazaridisNature2014	Modern	0	0	present	..	French.HO	Lourdes	France	43.09	-0.05	1240K pulldown padded to 3.2M snpset	HumanOrigins	..	..	..	591131	M	..	..	..	..	..	..	..	..	..	..	PASS	..
GREEKGRALPOP9.HO	GREEKGRALPOP9	..	..	2014	LazaridisNature2014	Modern	0	0	present	..	Greek.HO	Thessaloniki	Greece	40.64	22.94	1240K pulldown padded to 3.2M snpset	HumanOrigins	..	..	..	591206	M	..	..	..	..	..	..	..	..	..	..	PASS	..
TP04.HO	TP04	..	..	2014	LazaridisNature2014	Modern	0	0	present	..	Sicilian.HO	Trapani	Italy	38.019	12.515	1240K pulldown padded to 3.2M snpset	HumanOrigins	..	..	..	591648	M	..	..	..	..	..	..	..	..	..	..	PASS	..
CRO31.HO	CRO31	..	..	2014	LazaridisNature2014	Modern	0	0	present	..	Croatian.HO	Split	Croatia	43.513	16.446	1240K pulldown padded to 3.2M snpset	HumanOrigins	..	..	..	591720	M	..	..	..	..	..	..	..	..	..	..	PASS	..
TP25.HO	TP25	..	..	2014	LazaridisNature2014	Modern	0	0	present	..	Sicilian.HO	Trapani	Italy	38.019	12.515	1240K pulldown padded to 3.2M snpset	HumanOrigins	..	..	..	591652	M	..	..	..	..	..	..	..	..	..	..	PASS	..
GREEKGRALPOP4.HO	GREEKGRALPOP4	..	..	2014	LazaridisNature2014	Modern	0	0	present	..	Greek.HO	Thessaloniki	Greece	40.64	22.94	1240K pulldown padded to 3.2M snpset	HumanOrigins	..	..	..	591397	M	..	..	..	..	..	..	..	..	..	..	PASS	..
LibyanJew1601.HO	LibyanJew1601	..	..	2014	LazaridisNature2014	Modern	0	0	present	..	Jew_Libyan.HO	migrants_collected_in_Israel	Libya	32.9167	13.1833	1240K pulldown padded to 3.2M snpset	HumanOrigins	..	..	..	591637	M	..	..	..	..	..	..	..	..	..	..	PASS	..
CRO93.HO	CRO93	..	..	2014	LazaridisNature2014	Modern	0	0	present	..	Croatian.HO	Split	Croatia	43.513	16.446	1240K pulldown padded to 3.2M snpset	HumanOrigins	..	..	..	591685	M	..	..	..	..	..	..	..	..	..	..	PASS	..
Malta17AM91.HO	Malta17AM91	..	..	2014	LazaridisNature2014	Modern	0	0	present	..	Maltese.HO	La Valetta	Malta	35.94	14.38	1240K pulldown padded to 3.2M snpset	HumanOrigins	..	..	..	590983	M	..	..	..	..	..	..	..	..	..	..	PASS	..
SouthFrench3947.HO	SouthFrench3947	..	..	2014	LazaridisNature2014	Modern	0	0	present	..	French.HO	Dax	France	43.71	-1.05	1240K pulldown padded to 3.2M snpset	HumanOrigins	..	..	..	591511	M	..	..	..	..	..	..	..	..	..	..	PASS	..
SouthFrench1323.HO	SouthFrench1323	..	..	2014	LazaridisNature2014	Modern	0	0	present	..	French.HO	Dax	France	43.71	-1.05	1240K pulldown padded to 3.2M snpset	HumanOrigins	..	..	..	591279	M	..	..	..	..	..	..	..	..	..	..	PASS	..
SR48R.HO	SR48R	..	..	2014	LazaridisNature2014	Modern	0	0	present	..	Sicilian.HO	Siracusa	Italy	37.067	15.267	1240K pulldown padded to 3.2M snpset	HumanOrigins	..	..	..	591816	M	..	..	..	..	..	..	..	..	..	..	PASS	..
Balikesir16675.HO	Balikesir16675	..	..	2014	LazaridisNature2014	Modern	0	0	present	..	Turkish_Balikesir.HO	Balikesir	Turkey	39.385	27.533	1240K pulldown padded to 3.2M snpset	HumanOrigins	..	..	..	591587	F	..	n/a (female)	n/a (female)	..	..	..	..	..	..	..	PASS	..
YemeniteJew4938.HO	YemeniteJew4938	..	..	2014	LazaridisNature2014	Modern	0	0	present	..	Jew_Yemenite.HO	migrants_collected_in_Israel	Yemen	15.35	44.2	1240K pulldown padded to 3.2M snpset	HumanOrigins	..	..	..	591816	F	..	n/a (female)	n/a (female)	..	..	..	..	..	..	..	PASS	..
SR44.HO	SR44	..	..	2014	LazaridisNature2014	Modern	0	0	present	..	Sicilian.HO	Siracusa	Italy	37.067	15.267	1240K pulldown padded to 3.2M snpset	HumanOrigins	..	..	..	591750	M	..	..	..	..	..	..	..	..	..	..	PASS	..
SR64.HO	SR64	..	..	2014	LazaridisNature2014	Modern	0	0	present	..	Sicilian.HO	Siracusa	Italy	37.067	15.267	1240K pulldown padded to 3.2M snpset	HumanOrigins	..	..	..	591803	M	..	..	..	..	..	..	..	..	..	..	PASS	..
NOR148.HO	NOR148	..	..	2014	LazaridisNature2014	Modern	0	0	present	..	Norwegian.HO	Bergen	Norway	60.359	5.358	1240K pulldown padded to 3.2M snpset	HumanOrigins	..	..	..	591810	M	..	..	..	..	..	..	..	..	..	..	PASS	..
IraqiJew4061.HO	IraqiJew4061	..	..	2014	LazaridisNature2014	Modern	0	0	present	..	Jew_Iraqi.HO	migrants_collected_in_Israel	Iraq	33.325	44.422	1240K pulldown padded to 3.2M snpset	HumanOrigins	..	..	..	591840	M	..	..	..	..	..	..	..	..	..	..	PASS	..
CYP19.HO	CYP19	..	..	2014	LazaridisNature2014	Modern	0	0	present	..	Cypriot.HO	Nicosia	Cyprus	35.13	33.43	1240K pulldown padded to 3.2M snpset	HumanOrigins	..	..	..	591219	M	..	..	..	..	..	..	..	..	..	..	PASS	..
CRO48.HO	CRO48	..	..	2014	LazaridisNature2014	Modern	0	0	present	..	Croatian.HO	Split	Croatia	43.513	16.446	1240K pulldown padded to 3.2M snpset	HumanOrigins	..	..	..	591985	M	..	..	..	..	..	..	..	..	..	..	PASS	..
GREEKGRALPOP17.HO	GREEKGRALPOP17	..	..	2014	LazaridisNature2014	Modern	0	0	present	..	Greek.HO	Thessaloniki	Greece	40.64	22.94	1240K pulldown padded to 3.2M snpset	HumanOrigins	..	..	..	591620	M	..	..	..	..	..	..	..	..	..	..	PASS	..
ALB213.HO	ALB213	..	..	2014	LazaridisNature2014	Modern	0	0	present	..	Albanian.HO	Tirana	Albania	41.33	19.83	1240K pulldown padded to 3.2M snpset	HumanOrigins	..	..	..	591477	F	..	n/a (female)	n/a (female)	..	..	..	..	..	..	..	PASS	..
Turkish7BA57.HO	Turkish7BA57	..	..	2014	LazaridisNature2014	Modern	0	0	present	..	Turkish.HO	Istambul	Turkey	41.01	28.98	1240K pulldown padded to 3.2M snpset	HumanOrigins	..	..	..	591582	M	..	..	..	..	..	..	..	..	..	..	PASS	..
BAS22.HO	BAS22	..	..	2014	LazaridisNature2014	Modern	0	0	present	..	Basque.HO	Tolosa	Spain	43.13	-2.08	1240K pulldown padded to 3.2M snpset	HumanOrigins	..	..	..	591241	F	..	n/a (female)	n/a (female)	..	..	..	..	..	..	..	PASS	..
GREEKGRALPOP16.HO	GREEKGRALPOP16	..	..	2014	LazaridisNature2014	Modern	0	0	present	..	Greek.HO	Thessaloniki	Greece	40.64	22.94	1240K pulldown padded to 3.2M snpset	HumanOrigins	..	..	..	591650	M	..	..	..	..	..	..	..	..	..	..	PASS	..
LibyanJew1104.HO	LibyanJew1104	..	..	2014	LazaridisNature2014	Modern	0	0	present	..	Jew_Libyan.HO	migrants_collected_in_Israel	Libya	32.9167	13.1833	1240K pulldown padded to 3.2M snpset	HumanOrigins	..	..	..	591772	F	..	n/a (female)	n/a (female)	..	..	..	..	..	..	..	PASS	..
Balikesir16790.HO	Balikesir16790	..	..	2014	LazaridisNature2014	Modern	0	0	present	..	Turkish_Balikesir.HO	Balikesir	Turkey	39.385	27.533	1240K pulldown padded to 3.2M snpset	HumanOrigins	..	..	..	591774	M	..	..	..	..	..	..	..	..	..	..	PASS	..
NOR111.HO	NOR111	..	..	2014	LazaridisNature2014	Modern	0	0	present	..	Norwegian.HO	Bergen	Norway	60.359	5.358	1240K pulldown padded to 3.2M snpset	HumanOrigins	..	..	..	592064	M	..	..	..	..	..	..	..	..	..	..	PASS	..
SouthFrench3951.HO	SouthFrench3951	..	..	2014	LazaridisNature2014	Modern	0	0	present	..	French.HO	Dax	France	43.71	-1.05	1240K pulldown padded to 3.2M snpset	HumanOrigins	..	..	..	591581	M	..	..	..	..	..	..	..	..	..	..	PASS	..
BAS25.HO	BAS25	..	..	2014	LazaridisNature2014	Modern	0	0	present	..	Basque.HO	Tolosa	Spain	43.13	-2.08	1240K pulldown padded to 3.2M snpset	HumanOrigins	..	..	..	591351	M	..	..	..	..	..	..	..	..	..	..	PASS	..
BAS32.HO	BAS32	..	..	2014	LazaridisNature2014	Modern	0	0	present	..	Basque.HO	Tolosa	Spain	43.13	-2.08	1240K pulldown padded to 3.2M snpset	HumanOrigins	..	..	..	591631	M	..	..	..	..	..	..	..	..	..	..	PASS	..
GREEKGRALPOP11.HO	GREEKGRALPOP11	..	..	2014	LazaridisNature2014	Modern	0	0	present	..	Greek.HO	Thessaloniki	Greece	40.64	22.94	1240K pulldown padded to 3.2M snpset	HumanOrigins	..	..	..	591490	M	..	..	..	..	..	..	..	..	..	..	PASS	..
GREEKGRALPOP10.HO	GREEKGRALPOP10	..	..	2014	LazaridisNature2014	Modern	0	0	present	..	Greek.HO	Thessaloniki	Greece	40.64	22.94	1240K pulldown padded to 3.2M snpset	HumanOrigins	..	..	..	591554	M	..	..	..	..	..	..	..	..	..	..	PASS	..
Malta2AM91.HO	Malta2AM91	..	..	2014	LazaridisNature2014	Modern	0	0	present	..	Maltese.HO	La Valetta	Malta	35.94	14.38	1240K pulldown padded to 3.2M snpset	HumanOrigins	..	..	..	591671	M	..	..	..	..	..	..	..	..	..	..	PASS	..
GREEKGRALPOP3.HO	GREEKGRALPOP3	..	..	2014	LazaridisNature2014	Modern	0	0	present	..	Greek.HO	Thessaloniki	Greece	40.64	22.94	1240K pulldown padded to 3.2M snpset	HumanOrigins	..	..	..	591848	M	..	..	..	..	..	..	..	..	..	..	PASS	..
Malta16AM91.HO	Malta16AM91	..	..	2014	LazaridisNature2014	Modern	0	0	present	..	Maltese.HO	La Valetta	Malta	35.94	14.38	1240K pulldown padded to 3.2M snpset	HumanOrigins	..	..	..	591828	M	..	..	..	..	..	..	..	..	..	..	PASS	..
GREEKGRALPOP8.HO	GREEKGRALPOP8	..	..	2014	LazaridisNature2014	Modern	0	0	present	..	Greek.HO	Thessaloniki	Greece	40.64	22.94	1240K pulldown padded to 3.2M snpset	HumanOrigins	..	..	..	591844	M	..	..	..	..	..	..	..	..	..	..	PASS	..
IranianJew1132.HO	IranianJew1132	..	..	2014	LazaridisNature2014	Modern	0	0	present	..	Jew_Iranian.HO	migrants_collected_in_Israel	Iran	35.7	51.4167	1240K pulldown padded to 3.2M snpset	HumanOrigins	..	..	..	592052	F	..	n/a (female)	n/a (female)	..	..	..	..	..	..	..	PASS	..
MoroccanJew5126.HO	MoroccanJew5126	..	..	2014	LazaridisNature2014	Modern	0	0	present	..	Jew_Moroccan.HO	migrants_collected_in_Israel	Morocco	34.02	-6.84	1240K pulldown padded to 3.2M snpset	HumanOrigins	..	..	..	592055	M	..	..	..	..	..	..	..	..	..	..	PASS	..
Turkish8BA62.HO	Turkish8BA62	..	..	2014	LazaridisNature2014	Modern	0	0	present	..	Turkish.HO	Balikesir	Turkey	39.65	27.88	1240K pulldown padded to 3.2M snpset	HumanOrigins	..	..	..	591877	M	..	..	..	..	..	..	..	..	..	..	PASS	..
LibyanJew1462.HO	LibyanJew1462	..	..	2014	LazaridisNature2014	Modern	0	0	present	..	Jew_Libyan.HO	migrants_collected_in_Israel	Libya	32.9167	13.1833	1240K pulldown padded to 3.2M snpset	HumanOrigins	..	..	..	592065	F	..	n/a (female)	n/a (female)	..	..	..	..	..	..	..	PASS	..
CYP5.HO	CYP5	..	..	2014	LazaridisNature2014	Modern	0	0	present	..	Cypriot.HO	Nicosia	Cyprus	35.13	33.43	1240K pulldown padded to 3.2M snpset	HumanOrigins	..	..	..	591735	M	..	..	..	..	..	..	..	..	..	..	PASS	..
SouthFrench3068.HO	SouthFrench3068	..	..	2014	LazaridisNature2014	Modern	0	0	present	..	French.HO	Lourdes	France	43.09	-0.05	1240K pulldown padded to 3.2M snpset	HumanOrigins	..	..	..	591913	M	..	..	..	..	..	..	..	..	..	..	PASS	..
Cyprus13AJ19.HO	Cyprus13AJ19	..	..	2014	LazaridisNature2014	Modern	0	0	present	..	Cypriot.HO	Nicosia	Cyprus	35.13	33.43	1240K pulldown padded to 3.2M snpset	HumanOrigins	..	..	..	591936	M	..	..	..	..	..	..	..	..	..	..	PASS	..
TunisianJew1763.HO	TunisianJew1763	..	..	2014	LazaridisNature2014	Modern	0	0	present	..	Jew_Tunisian.HO	migrants_collected_in_Israel	Tunisia	36.8	10.1833	1240K pulldown padded to 3.2M snpset	HumanOrigins	..	..	..	592195	M	..	..	..	..	..	..	..	..	..	..	PASS	..
Malta15AM91.HO	Malta15AM91	..	..	2014	LazaridisNature2014	Modern	0	0	present	..	Maltese.HO	La Valetta	Malta	35.94	14.38	1240K pulldown padded to 3.2M snpset	HumanOrigins	..	..	..	592006	M	..	..	..	..	..	..	..	..	..	..	PASS	..
MoroccanJew4634.HO	MoroccanJew4634	..	..	2014	LazaridisNature2014	Modern	0	0	present	..	Jew_Moroccan.HO	migrants_collected_in_Israel	Morocco	34.02	-6.84	1240K pulldown padded to 3.2M snpset	HumanOrigins	..	..	..	592211	M	..	..	..	..	..	..	..	..	..	..	PASS	..
LibyanJew1263.HO	LibyanJew1263	..	..	2014	LazaridisNature2014	Modern	0	0	present	..	Jew_Libyan.HO	migrants_collected_in_Israel	Libya	32.9167	13.1833	1240K pulldown padded to 3.2M snpset	HumanOrigins	..	..	..	592159	F	..	n/a (female)	n/a (female)	..	..	..	..	..	..	..	PASS	..
Istanbul20010.HO	Istanbul20010	..	..	2014	LazaridisNature2014	Modern	0	0	present	..	Turkish.HO	Istanbul	Turkey	41.0167	28.95	1240K pulldown padded to 3.2M snpset	HumanOrigins	..	..	..	592095	M	..	..	..	..	..	..	..	..	..	..	PASS	..
BAS30.HO	BAS30	..	..	2014	LazaridisNature2014	Modern	0	0	present	..	Basque.HO	Tolosa	Spain	43.13	-2.08	1240K pulldown padded to 3.2M snpset	HumanOrigins	..	..	..	591999	F	..	n/a (female)	n/a (female)	..	..	..	..	..	..	..	PASS	..
Cyprus24AJ19.HO	Cyprus24AJ19	..	..	2014	LazaridisNature2014	Modern	0	0	present	..	Cypriot.HO	Nicosia	Cyprus	35.13	33.43	1240K pulldown padded to 3.2M snpset	HumanOrigins	..	..	..	591949	M	..	..	..	..	..	..	..	..	..	..	PASS	..
YemeniteJew4667.HO	YemeniteJew4667	..	..	2014	LazaridisNature2014	Modern	0	0	present	..	Jew_Yemenite.HO	migrants_collected_in_Israel	Yemen	15.35	44.2	1240K pulldown padded to 3.2M snpset	HumanOrigins	..	..	..	592205	F	..	n/a (female)	n/a (female)	..	..	..	..	..	..	..	PASS	..
TunisianJew1507.HO	TunisianJew1507	..	..	2014	LazaridisNature2014	Modern	0	0	present	..	Jew_Tunisian.HO	migrants_collected_in_Israel	Tunisia	36.8	10.1833	1240K pulldown padded to 3.2M snpset	HumanOrigins	..	..	..	592249	M	..	..	..	..	..	..	..	..	..	..	PASS	..
IraqiJew4241.HO	IraqiJew4241	..	..	2014	LazaridisNature2014	Modern	0	0	present	..	Jew_Iraqi.HO	migrants_collected_in_Israel	Iraq	33.325	44.422	1240K pulldown padded to 3.2M snpset	HumanOrigins	..	..	..	592270	M	..	..	..	..	..	..	..	..	..	..	PASS	..
TunisianJew1544.HO	TunisianJew1544	..	..	2014	LazaridisNature2014	Modern	0	0	present	..	Jew_Tunisian.HO	migrants_collected_in_Israel	Tunisia	36.8	10.1833	1240K pulldown padded to 3.2M snpset	HumanOrigins	..	..	..	592367	F	..	n/a (female)	n/a (female)	..	..	..	..	..	..	..	PASS	..
AshkenaziJew5783.HO	AshkenaziJew5783	..	..	2014	LazaridisNature2014	Modern	0	0	present	..	Jew_Ashkenazi.HO	migrants_collected_in_Israel	Poland	52.2333	21.0167	1240K pulldown padded to 3.2M snpset	HumanOrigins	..	..	..	592200	M	..	..	..	..	..	..	..	..	..	..	PASS	..
Turkish4BA57.HO	Turkish4BA57	..	..	2014	LazaridisNature2014	Modern	0	0	present	..	Turkish.HO	K√ºtahya	Turkey	39.42	29.98	1240K pulldown padded to 3.2M snpset	HumanOrigins	..	..	..	592114	M	..	..	..	..	..	..	..	..	..	..	PASS	..
AshkenaziJew5704.HO	AshkenaziJew5704	..	..	2014	LazaridisNature2014	Modern	0	0	present	..	Jew_Ashkenazi.HO	migrants_collected_in_Israel	Poland	52.2333	21.0167	1240K pulldown padded to 3.2M snpset	HumanOrigins	..	..	..	592320	F	..	n/a (female)	n/a (female)	..	..	..	..	..	..	..	PASS	..
MoroccanJew4789.HO	MoroccanJew4789	..	..	2014	LazaridisNature2014	Modern	0	0	present	..	Jew_Moroccan.HO	migrants_collected_in_Israel	Morocco	34.02	-6.84	1240K pulldown padded to 3.2M snpset	HumanOrigins	..	..	..	592259	F	..	n/a (female)	n/a (female)	..	..	..	..	..	..	..	PASS	..
IranianJew1159.HO	IranianJew1159	..	..	2014	LazaridisNature2014	Modern	0	0	present	..	Jew_Iranian.HO	migrants_collected_in_Israel	Iran	35.7	51.4167	1240K pulldown padded to 3.2M snpset	HumanOrigins	..	..	..	592266	M	..	..	..	..	..	..	..	..	..	..	PASS	..
MoroccanJew5168.HO	MoroccanJew5168	..	..	2014	LazaridisNature2014	Modern	0	0	present	..	Jew_Moroccan.HO	migrants_collected_in_Israel	Morocco	34.02	-6.84	1240K pulldown padded to 3.2M snpset	HumanOrigins	..	..	..	592290	M	..	..	..	..	..	..	..	..	..	..	PASS	..
IranianJew1513.HO	IranianJew1513	..	..	2014	LazaridisNature2014	Modern	0	0	present	..	Jew_Iranian.HO	migrants_collected_in_Israel	Iran	35.7	51.4167	1240K pulldown padded to 3.2M snpset	HumanOrigins	..	..	..	592267	F	..	n/a (female)	n/a (female)	..	..	..	..	..	..	..	PASS	..
AshkenaziJew5728.HO	AshkenaziJew5728	..	..	2014	LazaridisNature2014	Modern	0	0	present	..	Jew_Ashkenazi.HO	migrants_collected_in_Israel	Poland	52.2333	21.0167	1240K pulldown padded to 3.2M snpset	HumanOrigins	..	..	..	592324	F	..	n/a (female)	n/a (female)	..	..	..	..	..	..	..	PASS	..
ALB202.HO	ALB202	..	..	2014	LazaridisNature2014	Modern	0	0	present	..	Albanian.HO	Tirana	Albania	41.33	19.83	1240K pulldown padded to 3.2M snpset	HumanOrigins	..	..	..	592145	M	..	..	..	..	..	..	..	..	..	..	PASS	..
YemeniteJew4960.HO	YemeniteJew4960	..	..	2014	LazaridisNature2014	Modern	0	0	present	..	Jew_Yemenite.HO	migrants_collected_in_Israel	Yemen	15.35	44.2	1240K pulldown padded to 3.2M snpset	HumanOrigins	..	..	..	592230	M	..	..	..	..	..	..	..	..	..	..	PASS	..
GREEKGRALPOP12.HO	GREEKGRALPOP12	..	..	2014	LazaridisNature2014	Modern	0	0	present	..	Greek.HO	Thessaloniki	Greece	40.64	22.94	1240K pulldown padded to 3.2M snpset	HumanOrigins	..	..	..	592198	M	..	..	..	..	..	..	..	..	..	..	PASS	..
SouthFrench1112.HO	SouthFrench1112	..	..	2014	LazaridisNature2014	Modern	0	0	present	..	French.HO	Lourdes	France	43.09	-0.05	1240K pulldown padded to 3.2M snpset	HumanOrigins	..	..	..	592219	M	..	..	..	..	..	..	..	..	..	..	PASS	..
AshkenaziJew5790.HO	AshkenaziJew5790	..	..	2014	LazaridisNature2014	Modern	0	0	present	..	Jew_Ashkenazi.HO	migrants_collected_in_Israel	Poland	52.2333	21.0167	1240K pulldown padded to 3.2M snpset	HumanOrigins	..	..	..	592395	M	..	..	..	..	..	..	..	..	..	..	PASS	..
CYP2.HO	CYP2	..	..	2014	LazaridisNature2014	Modern	0	0	present	..	Cypriot.HO	Nicosia	Cyprus	35.13	33.43	1240K pulldown padded to 3.2M snpset	HumanOrigins	..	..	..	592136	M	..	..	..	..	..	..	..	..	..	..	PASS	..
GeorgianJew1607.HO	GeorgianJew1607	..	..	2014	LazaridisNature2014	Modern	0	0	present	..	Jew_Georgian.HO	migrants_collected_in_Israel	Georgia	41.7167	44.7833	1240K pulldown padded to 3.2M snpset	HumanOrigins	..	..	..	592417	F	..	n/a (female)	n/a (female)	..	..	..	..	..	..	..	PASS	..
GeorgianJew1671.HO	GeorgianJew1671	..	..	2014	LazaridisNature2014	Modern	0	0	present	..	Jew_Georgian.HO	migrants_collected_in_Israel	Georgia	41.7167	44.7833	1240K pulldown padded to 3.2M snpset	HumanOrigins	..	..	..	592421	M	..	..	..	..	..	..	..	..	..	..	PASS	..
Cyprus2AJ19.HO	Cyprus2AJ19	..	..	2014	LazaridisNature2014	Modern	0	0	present	..	Cypriot.HO	Nicosia	Cyprus	35.13	33.43	1240K pulldown padded to 3.2M snpset	HumanOrigins	..	..	..	592183	M	..	..	..	..	..	..	..	..	..	..	PASS	..
Adana23114.HO	Adana23114	..	..	2014	LazaridisNature2014	Modern	0	0	present	..	Turkish.HO	Adana	Turkey	37	35.3167	1240K pulldown padded to 3.2M snpset	HumanOrigins	..	..	..	592314	F	..	n/a (female)	n/a (female)	..	..	..	..	..	..	..	PASS	..
GREEKGRALPOP14.HO	GREEKGRALPOP14	..	..	2014	LazaridisNature2014	Modern	0	0	present	..	Greek.HO	Thessaloniki	Greece	40.64	22.94	1240K pulldown padded to 3.2M snpset	HumanOrigins	..	..	..	592204	M	..	..	..	..	..	..	..	..	..	..	PASS	..
IranianJew1556.HO	IranianJew1556	..	..	2014	LazaridisNature2014	Modern	0	0	present	..	Jew_Iranian.HO	migrants_collected_in_Israel	Iran	35.7	51.4167	1240K pulldown padded to 3.2M snpset	HumanOrigins	..	..	..	592431	F	..	n/a (female)	n/a (female)	..	..	..	..	..	..	..	PASS	..
TunisianJew1170.HO	TunisianJew1170	..	..	2014	LazaridisNature2014	Modern	0	0	present	..	Jew_Tunisian.HO	migrants_collected_in_Israel	Tunisia	36.8	10.1833	1240K pulldown padded to 3.2M snpset	HumanOrigins	..	..	..	592513	M	..	..	..	..	..	..	..	..	..	..	PASS	..
TunisianJew1531.HO	TunisianJew1531	..	..	2014	LazaridisNature2014	Modern	0	0	present	..	Jew_Tunisian.HO	migrants_collected_in_Israel	Tunisia	36.8	10.1833	1240K pulldown padded to 3.2M snpset	HumanOrigins	..	..	..	592342	F	..	n/a (female)	n/a (female)	..	..	..	..	..	..	..	PASS	..
SouthFrench4018.HO	SouthFrench4018	..	..	2014	LazaridisNature2014	Modern	0	0	present	..	French.HO	Dax	France	43.71	-1.05	1240K pulldown padded to 3.2M snpset	HumanOrigins	..	..	..	592328	M	..	..	..	..	..	..	..	..	..	..	PASS	..
Trabzon21177.HO	Trabzon21177	..	..	2014	LazaridisNature2014	Modern	0	0	present	..	Turkish.HO	Trabzon	Turkey	41	39.7333	1240K pulldown padded to 3.2M snpset	HumanOrigins	..	..	..	592245	M	..	..	..	..	..	..	..	..	..	..	PASS	..
GeorgianJew1577.HO	GeorgianJew1577	..	..	2014	LazaridisNature2014	Modern	0	0	present	..	Jew_Georgian.HO	migrants_collected_in_Israel	Georgia	41.7167	44.7833	1240K pulldown padded to 3.2M snpset	HumanOrigins	..	..	..	592311	M	..	..	..	..	..	..	..	..	..	..	PASS	..
BAS28.HO	BAS28	..	..	2014	LazaridisNature2014	Modern	0	0	present	..	Basque.HO	Tolosa	Spain	43.13	-2.08	1240K pulldown padded to 3.2M snpset	HumanOrigins	..	..	..	592321	F	..	n/a (female)	n/a (female)	..	..	..	..	..	..	..	PASS	..
Aydin18784.HO	Aydin18784	..	..	2014	LazaridisNature2014	Modern	0	0	present	..	Turkish.HO	Aydin	Turkey	37.85	27.8333	1240K pulldown padded to 3.2M snpset	HumanOrigins	..	..	..	592354	M	..	..	..	..	..	..	..	..	..	..	PASS	..
IraqiJew1417.HO	IraqiJew1417	..	..	2014	LazaridisNature2014	Modern	0	0	present	..	Jew_Iraqi.HO	migrants_collected_in_Israel	Iraq	33.325	44.422	1240K pulldown padded to 3.2M snpset	HumanOrigins	..	..	..	592473	M	..	..	..	..	..	..	..	..	..	..	PASS	..
Istanbul19810.HO	Istanbul19810	..	..	2014	LazaridisNature2014	Modern	0	0	present	..	Turkish.HO	Istanbul	Turkey	41.0167	28.95	1240K pulldown padded to 3.2M snpset	HumanOrigins	..	..	..	592334	F	..	n/a (female)	n/a (female)	..	..	..	..	..	..	..	PASS	..
Trabzon21557.HO	Trabzon21557	..	..	2014	LazaridisNature2014	Modern	0	0	present	..	Turkish.HO	Trabzon	Turkey	41	39.7333	1240K pulldown padded to 3.2M snpset	HumanOrigins	..	..	..	592367	M	..	..	..	..	..	..	..	..	..	..	PASS	..
LibyanJew1611.HO	LibyanJew1611	..	..	2014	LazaridisNature2014	Modern	0	0	present	..	Jew_Libyan.HO	migrants_collected_in_Israel	Libya	32.9167	13.1833	1240K pulldown padded to 3.2M snpset	HumanOrigins	..	..	..	592444	M	..	..	..	..	..	..	..	..	..	..	PASS	..
IranianJew1557.HO	IranianJew1557	..	..	2014	LazaridisNature2014	Modern	0	0	present	..	Jew_Iranian.HO	migrants_collected_in_Israel	Iran	35.7	51.4167	1240K pulldown padded to 3.2M snpset	HumanOrigins	..	..	..	592507	F	..	n/a (female)	n/a (female)	..	..	..	..	..	..	..	PASS	..
GeorgianJew1971.HO	GeorgianJew1971	..	..	2014	LazaridisNature2014	Modern	0	0	present	..	Jew_Georgian.HO	migrants_collected_in_Israel	Georgia	41.7167	44.7833	1240K pulldown padded to 3.2M snpset	HumanOrigins	..	..	..	592498	F	..	n/a (female)	n/a (female)	..	..	..	..	..	..	..	PASS	..
GeorgianJew1594.HO	GeorgianJew1594	..	..	2014	LazaridisNature2014	Modern	0	0	present	..	Jew_Georgian.HO	migrants_collected_in_Israel	Georgia	41.7167	44.7833	1240K pulldown padded to 3.2M snpset	HumanOrigins	..	..	..	592468	M	..	..	..	..	..	..	..	..	..	..	PASS	..
MoroccanJew4692.HO	MoroccanJew4692	..	..	2014	LazaridisNature2014	Modern	0	0	present	..	Jew_Moroccan.HO	migrants_collected_in_Israel	Morocco	34.02	-6.84	1240K pulldown padded to 3.2M snpset	HumanOrigins	..	..	..	592493	F	..	n/a (female)	n/a (female)	..	..	..	..	..	..	..	PASS	..
ALB212.HO	ALB212	..	..	2014	LazaridisNature2014	Modern	0	0	present	..	Albanian.HO	Tirana	Albania	41.33	19.83	1240K pulldown padded to 3.2M snpset	HumanOrigins	..	..	..	592301	F	..	n/a (female)	n/a (female)	..	..	..	..	..	..	..	PASS	..
IraqiJew1771.HO	IraqiJew1771	..	..	2014	LazaridisNature2014	Modern	0	0	present	..	Jew_Iraqi.HO	migrants_collected_in_Israel	Iraq	33.325	44.422	1240K pulldown padded to 3.2M snpset	HumanOrigins	..	..	..	592469	F	..	n/a (female)	n/a (female)	..	..	..	..	..	..	..	PASS	..
YemeniteJew5433.HO	YemeniteJew5433	..	..	2014	LazaridisNature2014	Modern	0	0	present	..	Jew_Yemenite.HO	migrants_collected_in_Israel	Yemen	15.35	44.2	1240K pulldown padded to 3.2M snpset	HumanOrigins	..	..	..	592483	M	..	..	..	..	..	..	..	..	..	..	PASS	..
ALB220.HO	ALB220	..	..	2014	LazaridisNature2014	Modern	0	0	present	..	Albanian.HO	Tirana	Albania	41.33	19.83	1240K pulldown padded to 3.2M snpset	HumanOrigins	..	..	..	592297	F	..	n/a (female)	n/a (female)	..	..	..	..	..	..	..	PASS	..
Cyprus22AJ19.HO	Cyprus22AJ19	..	..	2014	LazaridisNature2014	Modern	0	0	present	..	Cypriot.HO	Nicosia	Cyprus	35.13	33.43	1240K pulldown padded to 3.2M snpset	HumanOrigins	..	..	..	592295	F	..	n/a (female)	n/a (female)	..	..	..	..	..	..	..	PASS	..
YemeniteJew4937.HO	YemeniteJew4937	..	..	2014	LazaridisNature2014	Modern	0	0	present	..	Jew_Yemenite.HO	migrants_collected_in_Israel	Yemen	15.35	44.2	1240K pulldown padded to 3.2M snpset	HumanOrigins	..	..	..	592448	M	..	..	..	..	..	..	..	..	..	..	PASS	..
Malta12AM91.HO	Malta12AM91	..	..	2014	LazaridisNature2014	Modern	0	0	present	..	Maltese.HO	La Valetta	Malta	35.94	14.38	1240K pulldown padded to 3.2M snpset	HumanOrigins	..	..	..	592367	M	..	..	..	..	..	..	..	..	..	..	PASS	..
Trabzon21534.HO	Trabzon21534	..	..	2014	LazaridisNature2014	Modern	0	0	present	..	Turkish.HO	Trabzon	Turkey	41	39.7333	1240K pulldown padded to 3.2M snpset	HumanOrigins	..	..	..	592435	M	..	..	..	..	..	..	..	..	..	..	PASS	..
LibyanJew1605.HO	LibyanJew1605	..	..	2014	LazaridisNature2014	Modern	0	0	present	..	Jew_Libyan.HO	migrants_collected_in_Israel	Libya	32.9167	13.1833	1240K pulldown padded to 3.2M snpset	HumanOrigins	..	..	..	592510	M	..	..	..	..	..	..	..	..	..	..	PASS	..
BAS27.HO	BAS27	..	..	2014	LazaridisNature2014	Modern	0	0	present	..	Basque.HO	Tolosa	Spain	43.13	-2.08	1240K pulldown padded to 3.2M snpset	HumanOrigins	..	..	..	592406	M	..	..	..	..	..	..	..	..	..	..	PASS	..
Cyprus21AJ19.HO	Cyprus21AJ19	..	..	2014	LazaridisNature2014	Modern	0	0	present	..	Cypriot.HO	Nicosia	Cyprus	35.13	33.43	1240K pulldown padded to 3.2M snpset	HumanOrigins	..	..	..	592311	M	..	..	..	..	..	..	..	..	..	..	PASS	..
TunisianJew1511.HO	TunisianJew1511	..	..	2014	LazaridisNature2014	Modern	0	0	present	..	Jew_Tunisian.HO	migrants_collected_in_Israel	Tunisia	36.8	10.1833	1240K pulldown padded to 3.2M snpset	HumanOrigins	..	..	..	592543	F	..	n/a (female)	n/a (female)	..	..	..	..	..	..	..	PASS	..
Turkish9BA57.HO	Turkish9BA57	..	..	2014	LazaridisNature2014	Modern	0	0	present	..	Turkish.HO	Izmir	Turkey	38.42	27.13	1240K pulldown padded to 3.2M snpset	HumanOrigins	..	..	..	592442	M	..	..	..	..	..	..	..	..	..	..	PASS	..
Kayseri24075.HO	Kayseri24075	..	..	2014	LazaridisNature2014	Modern	0	0	present	..	Turkish.HO	Kayseri	Turkey	38.7333	35.4833	1240K pulldown padded to 3.2M snpset	HumanOrigins	..	..	..	592430	M	..	..	..	..	..	..	..	..	..	..	PASS	..
IraqiJew4291.HO	IraqiJew4291	..	..	2014	LazaridisNature2014	Modern	0	0	present	..	Jew_Iraqi.HO	migrants_collected_in_Israel	Iraq	33.325	44.422	1240K pulldown padded to 3.2M snpset	HumanOrigins	..	..	..	592556	M	..	..	..	..	..	..	..	..	..	..	PASS	..
ALB230.HO	ALB230	..	..	2014	LazaridisNature2014	Modern	0	0	present	..	Albanian.HO	Tirana	Albania	41.33	19.83	1240K pulldown padded to 3.2M snpset	HumanOrigins	..	..	..	592459	F	..	n/a (female)	n/a (female)	..	..	..	..	..	..	..	PASS	..
Adana23108.HO	Adana23108	..	..	2014	LazaridisNature2014	Modern	0	0	present	..	Turkish.HO	Adana	Turkey	37	35.3167	1240K pulldown padded to 3.2M snpset	HumanOrigins	..	..	..	592478	M	..	..	..	..	..	..	..	..	..	..	PASS	..
IranianJew1143.HO	IranianJew1143	..	..	2014	LazaridisNature2014	Modern	0	0	present	..	Jew_Iranian.HO	migrants_collected_in_Israel	Iran	35.7	51.4167	1240K pulldown padded to 3.2M snpset	HumanOrigins	..	..	..	592568	M	..	..	..	..	..	..	..	..	..	..	PASS	..
MoroccanJew4683.HO	MoroccanJew4683	..	..	2014	LazaridisNature2014	Modern	0	0	present	..	Jew_Moroccan.HO	migrants_collected_in_Israel	Morocco	34.02	-6.84	1240K pulldown padded to 3.2M snpset	HumanOrigins	..	..	..	592638	F	..	n/a (female)	n/a (female)	..	..	..	..	..	..	..	PASS	..
Balikesir16887.HO	Balikesir16887	..	..	2014	LazaridisNature2014	Modern	0	0	present	..	Turkish_Balikesir.HO	Balikesir	Turkey	39.385	27.533	1240K pulldown padded to 3.2M snpset	HumanOrigins	..	..	..	592518	F	..	n/a (female)	n/a (female)	..	..	..	..	..	..	..	PASS	..
IranianJew1832.HO	IranianJew1832	..	..	2014	LazaridisNature2014	Modern	0	0	present	..	Jew_Iranian.HO	migrants_collected_in_Israel	Iran	35.7	51.4167	1240K pulldown padded to 3.2M snpset	HumanOrigins	..	..	..	592594	M	..	..	..	..	..	..	..	..	..	..	PASS	..
GeorgianJew1654.HO	GeorgianJew1654	..	..	2014	LazaridisNature2014	Modern	0	0	present	..	Jew_Georgian.HO	migrants_collected_in_Israel	Georgia	41.7167	44.7833	1240K pulldown padded to 3.2M snpset	HumanOrigins	..	..	..	592666	F	..	n/a (female)	n/a (female)	..	..	..	..	..	..	..	PASS	..
BAS33.HO	BAS33	..	..	2014	LazaridisNature2014	Modern	0	0	present	..	Basque.HO	Tolosa	Spain	43.13	-2.08	1240K pulldown padded to 3.2M snpset	HumanOrigins	..	..	..	592522	F	..	n/a (female)	n/a (female)	..	..	..	..	..	..	..	PASS	..
GeorgianJew1883.HO	GeorgianJew1883	..	..	2014	LazaridisNature2014	Modern	0	0	present	..	Jew_Georgian.HO	migrants_collected_in_Israel	Georgia	41.7167	44.7833	1240K pulldown padded to 3.2M snpset	HumanOrigins	..	..	..	592660	M	..	..	..	..	..	..	..	..	..	..	PASS	..
LibyanJew1639.HO	LibyanJew1639	..	..	2014	LazaridisNature2014	Modern	0	0	present	..	Jew_Libyan.HO	migrants_collected_in_Israel	Libya	32.9167	13.1833	1240K pulldown padded to 3.2M snpset	HumanOrigins	..	..	..	592635	M	..	..	..	..	..	..	..	..	..	..	PASS	..
LibyanJew1659.HO	LibyanJew1659	..	..	2014	LazaridisNature2014	Modern	0	0	present	..	Jew_Libyan.HO	migrants_collected_in_Israel	Libya	32.9167	13.1833	1240K pulldown padded to 3.2M snpset	HumanOrigins	..	..	..	592689	M	..	..	..	..	..	..	..	..	..	..	PASS	..
Kayseri24266.HO	Kayseri24266	..	..	2014	LazaridisNature2014	Modern	0	0	present	..	Turkish.HO	Kayseri	Turkey	38.7333	35.4833	1240K pulldown padded to 3.2M snpset	HumanOrigins	..	..	..	592568	F	..	n/a (female)	n/a (female)	..	..	..	..	..	..	..	PASS	..
Balikesir16653.HO	Balikesir16653	..	..	2014	LazaridisNature2014	Modern	0	0	present	..	Turkish_Balikesir.HO	Balikesir	Turkey	39.385	27.533	1240K pulldown padded to 3.2M snpset	HumanOrigins	..	..	..	592584	M	..	..	..	..	..	..	..	..	..	..	PASS	..
Istanbul25095.HO	Istanbul25095	..	..	2014	LazaridisNature2014	Modern	0	0	present	..	Turkish.HO	Istanbul	Turkey	41.0167	28.95	1240K pulldown padded to 3.2M snpset	HumanOrigins	..	..	..	592602	M	..	..	..	..	..	..	..	..	..	..	PASS	..
Aydin18112.HO	Aydin18112	..	..	2014	LazaridisNature2014	Modern	0	0	present	..	Turkish.HO	Aydin	Turkey	37.85	27.8333	1240K pulldown padded to 3.2M snpset	HumanOrigins	..	..	..	592572	M	..	..	..	..	..	..	..	..	..	..	PASS	..
Kayseri24402.HO	Kayseri24402	..	..	2014	LazaridisNature2014	Modern	0	0	present	..	Turkish.HO	Kayseri	Turkey	38.7333	35.4833	1240K pulldown padded to 3.2M snpset	HumanOrigins	..	..	..	592614	F	..	n/a (female)	n/a (female)	..	..	..	..	..	..	..	PASS	..
Istanbul25081.HO	Istanbul25081	..	..	2014	LazaridisNature2014	Modern	0	0	present	..	Turkish.HO	Istanbul	Turkey	41.0167	28.95	1240K pulldown padded to 3.2M snpset	HumanOrigins	..	..	..	592636	M	..	..	..	..	..	..	..	..	..	..	PASS	..
Aydin18596.HO	Aydin18596	..	..	2014	LazaridisNature2014	Modern	0	0	present	..	Turkish.HO	Aydin	Turkey	37.85	27.8333	1240K pulldown padded to 3.2M snpset	HumanOrigins	..	..	..	592618	M	..	..	..	..	..	..	..	..	..	..	PASS	..
Istanbul17778.HO	Istanbul17778	..	..	2014	LazaridisNature2014	Modern	0	0	present	..	Turkish.HO	Istanbul	Turkey	41.0167	28.95	1240K pulldown padded to 3.2M snpset	HumanOrigins	..	..	..	592561	M	..	..	..	..	..	..	..	..	..	..	PASS	..
IraqiJew1430.HO	IraqiJew1430	..	..	2014	LazaridisNature2014	Modern	0	0	present	..	Jew_Iraqi.HO	migrants_collected_in_Israel	Iraq	33.325	44.422	1240K pulldown padded to 3.2M snpset	HumanOrigins	..	..	..	592729	F	..	n/a (female)	n/a (female)	..	..	..	..	..	..	..	PASS	..
Istanbul15781.HO	Istanbul15781	..	..	2014	LazaridisNature2014	Modern	0	0	present	..	Turkish.HO	Istanbul	Turkey	41.0167	28.95	1240K pulldown padded to 3.2M snpset	HumanOrigins	..	..	..	592657	M	..	..	..	..	..	..	..	..	..	..	PASS	..
Adana23136.HO	Adana23136	..	..	2014	LazaridisNature2014	Modern	0	0	present	..	Turkish.HO	Adana	Turkey	37	35.3167	1240K pulldown padded to 3.2M snpset	HumanOrigins	..	..	..	592658	M	..	..	..	..	..	..	..	..	..	..	PASS	..
AshkenaziJew5788.HO	AshkenaziJew5788	..	..	2014	LazaridisNature2014	Modern	0	0	present	..	Jew_Ashkenazi.HO	migrants_collected_in_Israel	Poland	52.2333	21.0167	1240K pulldown padded to 3.2M snpset	HumanOrigins	..	..	..	592769	M	..	..	..	..	..	..	..	..	..	..	PASS	..
Adana23113.HO	Adana23113	..	..	2014	LazaridisNature2014	Modern	0	0	present	..	Turkish.HO	Adana	Turkey	37	35.3167	1240K pulldown padded to 3.2M snpset	HumanOrigins	..	..	..	592698	M	..	..	..	..	..	..	..	..	..	..	PASS	..
Trabzon21575.HO	Trabzon21575	..	..	2014	LazaridisNature2014	Modern	0	0	present	..	Turkish.HO	Trabzon	Turkey	41	39.7333	1240K pulldown padded to 3.2M snpset	HumanOrigins	..	..	..	592682	M	..	..	..	..	..	..	..	..	..	..	PASS	..
Aydin18636.HO	Aydin18636	..	..	2014	LazaridisNature2014	Modern	0	0	present	..	Turkish.HO	Aydin	Turkey	37.85	27.8333	1240K pulldown padded to 3.2M snpset	HumanOrigins	..	..	..	592723	F	..	n/a (female)	n/a (female)	..	..	..	..	..	..	..	PASS	..
Istanbul20040.HO	Istanbul20040	..	..	2014	LazaridisNature2014	Modern	0	0	present	..	Turkish.HO	Istanbul	Turkey	41.0167	28.95	1240K pulldown padded to 3.2M snpset	HumanOrigins	..	..	..	592726	F	..	n/a (female)	n/a (female)	..	..	..	..	..	..	..	PASS	..
Adana23144.HO	Adana23144	..	..	2014	LazaridisNature2014	Modern	0	0	present	..	Turkish.HO	Adana	Turkey	37	35.3167	1240K pulldown padded to 3.2M snpset	HumanOrigins	..	..	..	592704	F	..	n/a (female)	n/a (female)	..	..	..	..	..	..	..	PASS	..
Kayseri23967.HO	Kayseri23967	..	..	2014	LazaridisNature2014	Modern	0	0	present	..	Turkish.HO	Kayseri	Turkey	38.7333	35.4833	1240K pulldown padded to 3.2M snpset	HumanOrigins	..	..	..	592713	M	..	..	..	..	..	..	..	..	..	..	PASS	..
IranianJew1845.HO	IranianJew1845	..	..	2014	LazaridisNature2014	Modern	0	0	present	..	Jew_Iranian.HO	migrants_collected_in_Israel	Iran	35.7	51.4167	1240K pulldown padded to 3.2M snpset	HumanOrigins	..	..	..	592822	M	..	..	..	..	..	..	..	..	..	..	PASS	..
Trabzon21174.HO	Trabzon21174	..	..	2014	LazaridisNature2014	Modern	0	0	present	..	Turkish.HO	Trabzon	Turkey	41	39.7333	1240K pulldown padded to 3.2M snpset	HumanOrigins	..	..	..	592725	M	..	..	..	..	..	..	..	..	..	..	PASS	..
Aydin18873.HO	Aydin18873	..	..	2014	LazaridisNature2014	Modern	0	0	present	..	Turkish.HO	Aydin	Turkey	37.85	27.8333	1240K pulldown padded to 3.2M snpset	HumanOrigins	..	..	..	592738	M	..	..	..	..	..	..	..	..	..	..	PASS	..
Kayseri23892.HO	Kayseri23892	..	..	2014	LazaridisNature2014	Modern	0	0	present	..	Turkish.HO	Kayseri	Turkey	38.7333	35.4833	1240K pulldown padded to 3.2M snpset	HumanOrigins	..	..	..	592762	M	..	..	..	..	..	..	..	..	..	..	PASS	..
Istanbul19185.HO	Istanbul19185	..	..	2014	LazaridisNature2014	Modern	0	0	present	..	Turkish.HO	Istanbul	Turkey	41.0167	28.95	1240K pulldown padded to 3.2M snpset	HumanOrigins	..	..	..	592783	M	..	..	..	..	..	..	..	..	..	..	PASS	..
Istanbul25098.HO	Istanbul25098	..	..	2014	LazaridisNature2014	Modern	0	0	present	..	Turkish.HO	Istanbul	Turkey	41.0167	28.95	1240K pulldown padded to 3.2M snpset	HumanOrigins	..	..	..	592778	M	..	..	..	..	..	..	..	..	..	..	PASS	..
Adana23133.HO	Adana23133	..	..	2014	LazaridisNature2014	Modern	0	0	present	..	Turkish.HO	Adana	Turkey	37	35.3167	1240K pulldown padded to 3.2M snpset	HumanOrigins	..	..	..	592759	F	..	n/a (female)	n/a (female)	..	..	..	..	..	..	..	PASS	..
Trabzon21515.HO	Trabzon21515	..	..	2014	LazaridisNature2014	Modern	0	0	present	..	Turkish.HO	Trabzon	Turkey	41	39.7333	1240K pulldown padded to 3.2M snpset	HumanOrigins	..	..	..	592753	M	..	..	..	..	..	..	..	..	..	..	PASS	..
Kayseri24032.HO	Kayseri24032	..	..	2014	LazaridisNature2014	Modern	0	0	present	..	Turkish.HO	Kayseri	Turkey	38.7333	35.4833	1240K pulldown padded to 3.2M snpset	HumanOrigins	..	..	..	592759	M	..	..	..	..	..	..	..	..	..	..	PASS	..
Kayseri23549.HO	Kayseri23549	..	..	2014	LazaridisNature2014	Modern	0	0	present	..	Turkish.HO	Kayseri	Turkey	38.7333	35.4833	1240K pulldown padded to 3.2M snpset	HumanOrigins	..	..	..	592764	M	..	..	..	..	..	..	..	..	..	..	PASS	..
Trabzon21544.HO	Trabzon21544	..	..	2014	LazaridisNature2014	Modern	0	0	present	..	Turkish.HO	Trabzon	Turkey	41	39.7333	1240K pulldown padded to 3.2M snpset	HumanOrigins	..	..	..	592802	M	..	..	..	..	..	..	..	..	..	..	PASS	..
Adana23150.HO	Adana23150	..	..	2014	LazaridisNature2014	Modern	0	0	present	..	Turkish.HO	Adana	Turkey	37	35.3167	1240K pulldown padded to 3.2M snpset	HumanOrigins	..	..	..	592791	M	..	..	..	..	..	..	..	..	..	..	PASS	..
Kayseri23271.HO	Kayseri23271	..	..	2014	LazaridisNature2014	Modern	0	0	present	..	Turkish.HO	Kayseri	Turkey	38.7333	35.4833	1240K pulldown padded to 3.2M snpset	HumanOrigins	..	..	..	592797	F	..	n/a (female)	n/a (female)	..	..	..	..	..	..	..	PASS	..
Trabzon21645.HO	Trabzon21645	..	..	2014	LazaridisNature2014	Modern	0	0	present	..	Turkish.HO	Trabzon	Turkey	41	39.7333	1240K pulldown padded to 3.2M snpset	HumanOrigins	..	..	..	592798	M	..	..	..	..	..	..	..	..	..	..	PASS	..
Adana23147.HO	Adana23147	..	..	2014	LazaridisNature2014	Modern	0	0	present	..	Turkish.HO	Adana	Turkey	37	35.3167	1240K pulldown padded to 3.2M snpset	HumanOrigins	..	..	..	592811	M	..	..	..	..	..	..	..	..	..	..	PASS	..
Aydin18483.HO	Aydin18483	..	..	2014	LazaridisNature2014	Modern	0	0	present	..	Turkish.HO	Aydin	Turkey	37.85	27.8333	1240K pulldown padded to 3.2M snpset	HumanOrigins	..	..	..	592875	F	..	n/a (female)	n/a (female)	..	..	..	..	..	..	..	PASS	..
Balikesir17006.HO	Balikesir17006	..	..	2014	LazaridisNature2014	Modern	0	0	present	..	Turkish_Balikesir.HO	Balikesir	Turkey	39.385	27.533	1240K pulldown padded to 3.2M snpset	HumanOrigins	..	..	..	592833	M	..	..	..	..	..	..	..	..	..	..	PASS	..
Aydin18419.HO	Aydin18419	..	..	2014	LazaridisNature2014	Modern	0	0	present	..	Turkish.HO	Aydin	Turkey	37.85	27.8333	1240K pulldown padded to 3.2M snpset	HumanOrigins	..	..	..	592874	F	..	n/a (female)	n/a (female)	..	..	..	..	..	..	..	PASS	..
Kayseri24276.HO	Kayseri24276	..	..	2014	LazaridisNature2014	Modern	0	0	present	..	Turkish.HO	Kayseri	Turkey	38.7333	35.4833	1240K pulldown padded to 3.2M snpset	HumanOrigins	..	..	..	592841	F	..	n/a (female)	n/a (female)	..	..	..	..	..	..	..	PASS	..
Istanbul19708.HO	Istanbul19708	..	..	2014	LazaridisNature2014	Modern	0	0	present	..	Turkish.HO	Istanbul	Turkey	41.0167	28.95	1240K pulldown padded to 3.2M snpset	HumanOrigins	..	..	..	592869	F	..	n/a (female)	n/a (female)	..	..	..	..	..	..	..	PASS	..
Trabzon21173.HO	Trabzon21173	..	..	2014	LazaridisNature2014	Modern	0	0	present	..	Turkish.HO	Trabzon	Turkey	41	39.7333	1240K pulldown padded to 3.2M snpset	HumanOrigins	..	..	..	592857	M	..	..	..	..	..	..	..	..	..	..	PASS	..
Adana23112.HO	Adana23112	..	..	2014	LazaridisNature2014	Modern	0	0	present	..	Turkish.HO	Adana	Turkey	37	35.3167	1240K pulldown padded to 3.2M snpset	HumanOrigins	..	..	..	592872	M	..	..	..	..	..	..	..	..	..	..	PASS	..
Adana23117.HO	Adana23117	..	..	2014	LazaridisNature2014	Modern	0	0	present	..	Turkish.HO	Adana	Turkey	37	35.3167	1240K pulldown padded to 3.2M snpset	HumanOrigins	..	..	..	592935	M	..	..	..	..	..	..	..	..	..	..	PASS	..
Lebanese1AQ127.HO	Lebanese1AQ127	..	..	2016	LazaridisNature2016	Modern	0	0	present	..	Lebanese_Christian.HO	Beirut	Lebanon	33.89	35.5	1240K pulldown padded to 3.2M snpset	HumanOrigins	..	..	..	585275	M	..	..	..	..	..	..	..	..	..	..	PASS	..
Lebanese1AQ170.HO	Lebanese1AQ170	..	..	2016	LazaridisNature2016	Modern	0	0	present	..	Lebanese_Christian.HO	Beirut	Lebanon	33.89	35.5	1240K pulldown padded to 3.2M snpset	HumanOrigins	..	..	..	584898	F	..	n/a (female)	n/a (female)	..	..	..	..	..	..	..	PASS	..
Lebanese2AQ121.HO	Lebanese2AQ121	..	..	2016	LazaridisNature2016	Modern	0	0	present	..	Lebanese_Muslim.HO	Beirut	Lebanon	33.89	35.5	1240K pulldown padded to 3.2M snpset	HumanOrigins	..	..	..	586224	F	..	n/a (female)	n/a (female)	..	..	..	..	..	..	..	PASS	..
Lebanese2AQ127.HO	Lebanese2AQ127	..	..	2016	LazaridisNature2016	Modern	0	0	present	..	Lebanese_Muslim.HO	Beirut	Lebanon	33.89	35.5	1240K pulldown padded to 3.2M snpset	HumanOrigins	..	..	..	575061	M	..	..	..	..	..	..	..	..	..	..	PASS	..
Lebanese4AQ115.HO	Lebanese4AQ115	..	..	2016	LazaridisNature2016	Modern	0	0	present	..	Lebanese_Christian.HO	Beirut	Lebanon	33.89	35.5	1240K pulldown padded to 3.2M snpset	HumanOrigins	..	..	..	585533	M	..	..	..	..	..	..	..	..	..	..	PASS	..
Lebanese6AQ115.HO	Lebanese6AQ115	..	..	2016	LazaridisNature2016	Modern	0	0	present	..	Lebanese_Christian.HO	Beirut	Lebanon	33.89	35.5	1240K pulldown padded to 3.2M snpset	HumanOrigins	..	..	..	582787	M	..	..	..	..	..	..	..	..	..	..	PASS	..
Lebanese6AQ170.HO	Lebanese6AQ170	..	..	2016	LazaridisNature2016	Modern	0	0	present	..	Lebanese_Christian.HO	Beirut	Lebanon	33.89	35.5	1240K pulldown padded to 3.2M snpset	HumanOrigins	..	..	..	580620	M	..	..	..	..	..	..	..	..	..	..	PASS	..
Lebanese6AS15.HO	Lebanese6AS15	..	..	2016	LazaridisNature2016	Modern	0	0	present	..	Lebanese_Muslim.HO	Beirut	Lebanon	33.89	35.5	1240K pulldown padded to 3.2M snpset	HumanOrigins	..	..	..	586229	M	..	..	..	..	..	..	..	..	..	..	PASS	..
Lebanese7AQ150.HO	Lebanese7AQ150	..	..	2016	LazaridisNature2016	Modern	0	0	present	..	Lebanese_Muslim.HO	Beirut	Lebanon	33.89	35.5	1240K pulldown padded to 3.2M snpset	HumanOrigins	..	..	..	582945	M	..	..	..	..	..	..	..	..	..	..	PASS	..
Lebanese7AR20.HO	Lebanese7AR20	..	..	2016	LazaridisNature2016	Modern	0	0	present	..	Lebanese_Muslim.HO	Beirut	Lebanon	33.89	35.5	1240K pulldown padded to 3.2M snpset	HumanOrigins	..	..	..	586281	M	..	..	..	..	..	..	..	..	..	..	PASS	..
Lebanese7AR23.HO	Lebanese7AR23	..	..	2016	LazaridisNature2016	Modern	0	0	present	..	Lebanese_Muslim.HO	Beirut	Lebanon	33.89	35.5	1240K pulldown padded to 3.2M snpset	HumanOrigins	..	..	..	586203	M	..	..	..	..	..	..	..	..	..	..	PASS	..
Lebanese8AS15.HO	Lebanese8AS15	..	..	2016	LazaridisNature2016	Modern	0	0	present	..	Lebanese_Christian.HO	Beirut	Lebanon	33.89	35.5	1240K pulldown padded to 3.2M snpset	HumanOrigins	..	..	..	585523	M	..	..	..	..	..	..	..	..	..	..	PASS	..
Lebanese10AQ127.HO	Lebanese10AQ127	..	..	2016	LazaridisNature2016	Modern	0	0	present	..	Lebanese_Muslim.HO	Beirut	Lebanon	33.89	35.5	1240K pulldown padded to 3.2M snpset	HumanOrigins	..	..	..	586331	M	..	..	..	..	..	..	..	..	..	..	PASS	..
Lebanese10AR37.HO	Lebanese10AR37	..	..	2016	LazaridisNature2016	Modern	0	0	present	..	Lebanese_Christian.HO	Beirut	Lebanon	33.89	35.5	1240K pulldown padded to 3.2M snpset	HumanOrigins	..	..	..	586228	M	..	..	..	..	..	..	..	..	..	..	PASS	..
Lebanese11AS14.HO	Lebanese11AS14	..	..	2016	LazaridisNature2016	Modern	0	0	present	..	Lebanese_Muslim.HO	Beirut	Lebanon	33.89	35.5	1240K pulldown padded to 3.2M snpset	HumanOrigins	..	..	..	586312	F	..	n/a (female)	n/a (female)	..	..	..	..	..	..	..	PASS	..
Lebanese15AR37.HO	Lebanese15AR37	..	..	2016	LazaridisNature2016	Modern	0	0	present	..	Lebanese_Christian.HO	Beirut	Lebanon	33.89	35.5	1240K pulldown padded to 3.2M snpset	HumanOrigins	..	..	..	567480	M	..	..	..	..	..	..	..	..	..	..	PASS	..
Lebanese20AR21.HO	Lebanese20AR21	..	..	2016	LazaridisNature2016	Modern	0	0	present	..	Lebanese_Muslim.HO	Beirut	Lebanon	33.89	35.5	1240K pulldown padded to 3.2M snpset	HumanOrigins	..	..	..	585773	F	..	n/a (female)	n/a (female)	..	..	..	..	..	..	..	PASS	..
Lebanese22BA23.HO	Lebanese22BA23	..	..	2016	LazaridisNature2016	Modern	0	0	present	..	Lebanese_Christian.HO	Beirut	Lebanon	33.89	35.5	1240K pulldown padded to 3.2M snpset	HumanOrigins	..	..	..	585847	F	..	n/a (female)	n/a (female)	..	..	..	..	..	..	..	PASS	..
Lebanese24AR27.HO	Lebanese24AR27	..	..	2016	LazaridisNature2016	Modern	0	0	present	..	Lebanese_Muslim.HO	Beirut	Lebanon	33.89	35.5	1240K pulldown padded to 3.2M snpset	HumanOrigins	..	..	..	585528	M	..	..	..	..	..	..	..	..	..	..	PASS	..
Lebanese30AR21.HO	Lebanese30AR21	..	..	2016	LazaridisNature2016	Modern	0	0	present	..	Lebanese_Muslim.HO	Beirut	Lebanon	33.89	35.5	1240K pulldown padded to 3.2M snpset	HumanOrigins	..	..	..	579701	M	..	..	..	..	..	..	..	..	..	..	PASS	..
French23812.HO	French23812	..	..	2016	LazaridisNature2016	Modern	0	0	present	..	French.HO	Finistere	France	48.2988	-4.12301	1240K pulldown padded to 3.2M snpset	HumanOrigins	..	..	..	582008	M	..	..	..	..	..	..	..	..	..	..	PASS	..
French23814.HO	French23814	..	..	2016	LazaridisNature2016	Modern	0	0	present	..	French.HO	Nord	France	50.4281	3.24679	1240K pulldown padded to 3.2M snpset	HumanOrigins	..	..	..	586275	M	..	..	..	..	..	..	..	..	..	..	PASS	..
French23821.HO	French23821	..	..	2016	LazaridisNature2016	Modern	0	0	present	..	French.HO	Pas-de-Calais	France	50.462	2.333	1240K pulldown padded to 3.2M snpset	HumanOrigins	..	..	..	585729	F	..	n/a (female)	n/a (female)	..	..	..	..	..	..	..	PASS	..
French23830.HO	French23830	..	..	2016	LazaridisNature2016	Modern	0	0	present	..	French.HO	Ille-et-Vilaine	France	48.1926	-1.62791	1240K pulldown padded to 3.2M snpset	HumanOrigins	..	..	..	585478	M	..	..	..	..	..	..	..	..	..	..	PASS	..
French23833.HO	French23833	..	..	2016	LazaridisNature2016	Modern	0	0	present	..	French.HO	Finistere	France	48.2988	-4.12301	1240K pulldown padded to 3.2M snpset	HumanOrigins	..	..	..	585465	F	..	n/a (female)	n/a (female)	..	..	..	..	..	..	..	PASS	..
French23862.HO	French23862	..	..	2016	LazaridisNature2016	Modern	0	0	present	..	French.HO	Pas-de-Calais	France	50.462	2.333	1240K pulldown padded to 3.2M snpset	HumanOrigins	..	..	..	584195	M	..	..	..	..	..	..	..	..	..	..	PASS	..
French23915.HO	French23915	..	..	2016	LazaridisNature2016	Modern	0	0	present	..	French.HO	Seine-Maritime	France	49.6751	0.977686	1240K pulldown padded to 3.2M snpset	HumanOrigins	..	..	..	584101	M	..	..	..	..	..	..	..	..	..	..	PASS	..
French23919.HO	French23919	..	..	2016	LazaridisNature2016	Modern	0	0	present	..	French.HO	Yonne	France	47.8478	3.59256	1240K pulldown padded to 3.2M snpset	HumanOrigins	..	..	..	582950	F	..	n/a (female)	n/a (female)	..	..	..	..	..	..	..	PASS	..
French23989.HO	French23989	..	..	2016	LazaridisNature2016	Modern	0	0	present	..	French.HO	Cote d'Armor	France	48.4747	-2.8394	1240K pulldown padded to 3.2M snpset	HumanOrigins	..	..	..	581294	F	..	n/a (female)	n/a (female)	..	..	..	..	..	..	..	PASS	..
French24061.HO	French24061	..	..	2016	LazaridisNature2016	Modern	0	0	present	..	French.HO	Loire-Atlantique	France	47.3428	-1.66718	1240K pulldown padded to 3.2M snpset	HumanOrigins	..	..	..	585854	M	..	..	..	..	..	..	..	..	..	..	PASS	..
French24075.HO	French24075	..	..	2016	LazaridisNature2016	Modern	0	0	present	..	French.HO	Moselle	France	49.047	6.61545	1240K pulldown padded to 3.2M snpset	HumanOrigins	..	..	..	584066	F	..	n/a (female)	n/a (female)	..	..	..	..	..	..	..	PASS	..
French24076.HO	French24076	..	..	2016	LazaridisNature2016	Modern	0	0	present	..	French.HO	Moselle	France	49.047	6.61545	1240K pulldown padded to 3.2M snpset	HumanOrigins	..	..	..	585152	M	..	..	..	..	..	..	..	..	..	..	PASS	..
French24090.HO	French24090	..	..	2016	LazaridisNature2016	Modern	0	0	present	..	French.HO	Cote d'Armor	France	48.4747	-2.8394	1240K pulldown padded to 3.2M snpset	HumanOrigins	..	..	..	586401	M	..	..	..	..	..	..	..	..	..	..	PASS	..
French24118.HO	French24118	..	..	2016	LazaridisNature2016	Modern	0	0	present	..	French.HO	Cote d'Or	France	47.3733	4.79408	1240K pulldown padded to 3.2M snpset	HumanOrigins	..	..	..	585036	M	..	..	..	..	..	..	..	..	..	..	PASS	..
French24120.HO	French24120	..	..	2016	LazaridisNature2016	Modern	0	0	present	..	French.HO	Finistere	France	48.2988	-4.12301	1240K pulldown padded to 3.2M snpset	HumanOrigins	..	..	..	584342	F	..	n/a (female)	n/a (female)	..	..	..	..	..	..	..	PASS	..
French24124.HO	French24124	..	..	2016	LazaridisNature2016	Modern	0	0	present	..	French.HO	Moselle	France	49.047	6.61545	1240K pulldown padded to 3.2M snpset	HumanOrigins	..	..	..	583210	M	..	..	..	..	..	..	..	..	..	..	PASS	..
French24144.HO	French24144	..	..	2016	LazaridisNature2016	Modern	0	0	present	..	French.HO	Nord	France	50.4281	3.24679	1240K pulldown padded to 3.2M snpset	HumanOrigins	..	..	..	575628	F	..	n/a (female)	n/a (female)	..	..	..	..	..	..	..	PASS	..
French24148.HO	French24148	..	..	2016	LazaridisNature2016	Modern	0	0	present	..	French.HO	Moselle	France	49.047	6.61545	1240K pulldown padded to 3.2M snpset	HumanOrigins	..	..	..	585942	M	..	..	..	..	..	..	..	..	..	..	PASS	..
French24178.HO	French24178	..	..	2016	LazaridisNature2016	Modern	0	0	present	..	French.HO	Moselle	France	49.047	6.61545	1240K pulldown padded to 3.2M snpset	HumanOrigins	..	..	..	581962	F	..	n/a (female)	n/a (female)	..	..	..	..	..	..	..	PASS	..
French24247.HO	French24247	..	..	2016	LazaridisNature2016	Modern	0	0	present	..	French.HO	Cote d'Armor	France	48.4747	-2.8394	1240K pulldown padded to 3.2M snpset	HumanOrigins	..	..	..	585111	F	..	n/a (female)	n/a (female)	..	..	..	..	..	..	..	PASS	..
French24381.HO	French24381	..	..	2016	LazaridisNature2016	Modern	0	0	present	..	French.HO	Finistere	France	48.2988	-4.12301	1240K pulldown padded to 3.2M snpset	HumanOrigins	..	..	..	585469	F	..	n/a (female)	n/a (female)	..	..	..	..	..	..	..	PASS	..
French24400.HO	French24400	..	..	2016	LazaridisNature2016	Modern	0	0	present	..	French.HO	Finistere	France	48.2988	-4.12301	1240K pulldown padded to 3.2M snpset	HumanOrigins	..	..	..	585243	M	..	..	..	..	..	..	..	..	..	..	PASS	..
French24408.HO	French24408	..	..	2016	LazaridisNature2016	Modern	0	0	present	..	French.HO	Seine-Maritime	France	49.6751	0.977686	1240K pulldown padded to 3.2M snpset	HumanOrigins	..	..	..	584913	F	..	n/a (female)	n/a (female)	..	..	..	..	..	..	..	PASS	..
French24433.HO	French24433	..	..	2016	LazaridisNature2016	Modern	0	0	present	..	French.HO	Moselle	France	49.047	6.61545	1240K pulldown padded to 3.2M snpset	HumanOrigins	..	..	..	581157	M	..	..	..	..	..	..	..	..	..	..	PASS	..
French24434.HO	French24434	..	..	2016	LazaridisNature2016	Modern	0	0	present	..	French.HO	Moselle	France	49.047	6.61545	1240K pulldown padded to 3.2M snpset	HumanOrigins	..	..	..	586186	F	..	n/a (female)	n/a (female)	..	..	..	..	..	..	..	PASS	..
French24437.HO	French24437	..	..	2016	LazaridisNature2016	Modern	0	0	present	..	French.HO	Moselle	France	49.047	6.61545	1240K pulldown padded to 3.2M snpset	HumanOrigins	..	..	..	586102	F	..	n/a (female)	n/a (female)	..	..	..	..	..	..	..	PASS	..
French24690.HO	French24690	..	..	2016	LazaridisNature2016	Modern	0	0	present	..	French.HO	Pas-de-Calais	France	50.462	2.333	1240K pulldown padded to 3.2M snpset	HumanOrigins	..	..	..	585072	U	..	..	..	..	..	..	..	..	..	..	PASS	..
French24817.HO	French24817	..	..	2016	LazaridisNature2016	Modern	0	0	present	..	French.HO	Aisne	France	49.5484	3.52934	1240K pulldown padded to 3.2M snpset	HumanOrigins	..	..	..	576598	M	..	..	..	..	..	..	..	..	..	..	PASS	..
French25068.HO	French25068	..	..	2016	LazaridisNature2016	Modern	0	0	present	..	French.HO	Pas-de-Calais	France	50.462	2.333	1240K pulldown padded to 3.2M snpset	HumanOrigins	..	..	..	586079	F	..	n/a (female)	n/a (female)	..	..	..	..	..	..	..	PASS	..
PV001.HO	PV001	..	..	2016	LazaridisNature2016	Modern	0	0	present	..	Iranian_Bandari.HO	Bandar Abbas / Hormozgan	Iran	27.183	56.267	1240K pulldown padded to 3.2M snpset	HumanOrigins	..	..	..	586300	M	..	..	..	..	..	..	..	..	..	..	PASS	..
PV002.HO	PV002	..	..	2016	LazaridisNature2016	Modern	0	0	present	..	Iranian_Bandari.HO	Bandar Abbas / Hormozgan	Iran	27.183	56.267	1240K pulldown padded to 3.2M snpset	HumanOrigins	..	..	..	584526	M	..	..	..	..	..	..	..	..	..	..	PASS	..
PV003.HO	PV003	..	..	2016	LazaridisNature2016	Modern	0	0	present	..	Iranian_Bandari.HO	Bandar Abbas / Hormozgan	Iran	27.183	56.267	1240K pulldown padded to 3.2M snpset	HumanOrigins	..	..	..	585883	M	..	..	..	..	..	..	..	..	..	..	PASS	..
PV004.HO	PV004	..	..	2016	LazaridisNature2016	Modern	0	0	present	..	Iranian_Bandari.HO	Bandar Abbas / Hormozgan	Iran	27.183	56.267	1240K pulldown padded to 3.2M snpset	HumanOrigins	..	..	..	586488	M	..	..	..	..	..	..	..	..	..	..	PASS	..
PV005.HO	PV005	..	..	2016	LazaridisNature2016	Modern	0	0	present	..	Iranian_Bandari.HO	Bandar Abbas / Hormozgan	Iran	27.183	56.267	1240K pulldown padded to 3.2M snpset	HumanOrigins	..	..	..	586567	M	..	..	..	..	..	..	..	..	..	..	PASS	..
PV006.HO	PV006	..	..	2016	LazaridisNature2016	Modern	0	0	present	..	Iranian_Bandari.HO	Bandar Abbas / Hormozgan	Iran	27.183	56.267	1240K pulldown padded to 3.2M snpset	HumanOrigins	..	..	..	586554	M	..	..	..	..	..	..	..	..	..	..	PASS	..
PV007.HO	PV007	..	..	2016	LazaridisNature2016	Modern	0	0	present	..	Iranian_Bandari.HO	Bandar Abbas / Hormozgan	Iran	27.183	56.267	1240K pulldown padded to 3.2M snpset	HumanOrigins	..	..	..	586605	M	..	..	..	..	..	..	..	..	..	..	PASS	..
PV008.HO	PV008	..	..	2016	LazaridisNature2016	Modern	0	0	present	..	Iranian_Bandari.HO	Bandar Abbas / Hormozgan	Iran	27.183	56.267	1240K pulldown padded to 3.2M snpset	HumanOrigins	..	..	..	585764	M	..	..	..	..	..	..	..	..	..	..	PASS	..
PV019.HO	PV019	..	..	2016	LazaridisNature2016	Modern	0	0	present	..	Iranian.HO	Babol / Mazandaran / Mazandarani	Iran	36.529	52.671	1240K pulldown padded to 3.2M snpset	HumanOrigins	..	..	..	586063	M	..	..	..	..	..	..	..	..	..	..	PASS	..
PV020.HO	PV020	..	..	2016	LazaridisNature2016	Modern	0	0	present	..	Iranian.HO	Babol / Mazandaran / Mazandarani	Iran	36.529	52.671	1240K pulldown padded to 3.2M snpset	HumanOrigins	..	..	..	584337	M	..	..	..	..	..	..	..	..	..	..	PASS	..
PV021.HO	PV021	..	..	2016	LazaridisNature2016	Modern	0	0	present	..	Iranian.HO	Babol / Mazandaran / Mazandarani	Iran	36.529	52.671	1240K pulldown padded to 3.2M snpset	HumanOrigins	..	..	..	584628	M	..	..	..	..	..	..	..	..	..	..	PASS	..
PV022.HO	PV022	..	..	2016	LazaridisNature2016	Modern	0	0	present	..	Iranian.HO	Babol / Mazandaran / Mazandarani	Iran	36.529	52.671	1240K pulldown padded to 3.2M snpset	HumanOrigins	..	..	..	586481	M	..	..	..	..	..	..	..	..	..	..	PASS	..
PV023.HO	PV023	..	..	2016	LazaridisNature2016	Modern	0	0	present	..	Iranian.HO	Babol / Mazandaran / Mazandarani	Iran	36.529	52.671	1240K pulldown padded to 3.2M snpset	HumanOrigins	..	..	..	586140	M	..	..	..	..	..	..	..	..	..	..	PASS	..
PV024.HO	PV024	..	..	2016	LazaridisNature2016	Modern	0	0	present	..	Iranian.HO	Babol / Mazandaran / Mazandarani	Iran	36.529	52.671	1240K pulldown padded to 3.2M snpset	HumanOrigins	..	..	..	586549	M	..	..	..	..	..	..	..	..	..	..	PASS	..
PV025.HO	PV025	..	..	2016	LazaridisNature2016	Modern	0	0	present	..	Iranian.HO	Babol / Mazandaran / Mazandarani	Iran	36.529	52.671	1240K pulldown padded to 3.2M snpset	HumanOrigins	..	..	..	585689	M	..	..	..	..	..	..	..	..	..	..	PASS	..
PV026.HO	PV026	..	..	2016	LazaridisNature2016	Modern	0	0	present	..	Iranian.HO	Babol / Mazandaran / Mazandarani	Iran	36.529	52.671	1240K pulldown padded to 3.2M snpset	HumanOrigins	..	..	..	584486	M	..	..	..	..	..	..	..	..	..	..	PASS	..
PV027.HO	PV027	..	..	2016	LazaridisNature2016	Modern	0	0	present	..	Iranian.HO	Babol / Mazandaran / Mazandarani	Iran	36.529	52.671	1240K pulldown padded to 3.2M snpset	HumanOrigins	..	..	..	584405	M	..	..	..	..	..	..	..	..	..	..	PASS	..
PV028.HO	PV028	..	..	2016	LazaridisNature2016	Modern	0	0	present	..	Iranian.HO	Babol / Mazandaran / Mazandarani	Iran	36.529	52.671	1240K pulldown padded to 3.2M snpset	HumanOrigins	..	..	..	586296	M	..	..	..	..	..	..	..	..	..	..	PASS	..
ITS4.HO	ITS4	..	..	2016	LazaridisNature2016	Modern	0	0	present	..	Italian_South.HO	Naples	Italy	40.68	14.77	1240K pulldown padded to 3.2M snpset	HumanOrigins	..	..	..	586389	F	..	n/a (female)	n/a (female)	..	..	..	..	..	..	..	PASS	..
ITS5.HO	ITS5	..	..	2016	LazaridisNature2016	Modern	0	0	present	..	Italian_South.HO	Salerno	Italy	40.39	16.55	1240K pulldown padded to 3.2M snpset	HumanOrigins	..	..	..	586078	F	..	n/a (female)	n/a (female)	..	..	..	..	..	..	..	PASS	..
ITS7.HO	ITS7	..	..	2016	LazaridisNature2016	Modern	0	0	present	..	Italian_South.HO	Crispiano	Italy	40.85	14.27	1240K pulldown padded to 3.2M snpset	HumanOrigins	..	..	..	583101	M	..	..	..	..	..	..	..	..	..	..	PASS	..
PV009.HO	PV009	..	..	2016	LazaridisNature2016	Modern	0	0	present	..	Iranian.HO	Khoramabad / Lorestan / Lori	Iran	33.465	48.339	1240K pulldown padded to 3.2M snpset	HumanOrigins	..	..	..	585009	M	..	..	..	..	..	..	..	..	..	..	PASS	..
PV010.HO	PV010	..	..	2016	LazaridisNature2016	Modern	0	0	present	..	Iranian.HO	Khoramabad / Lorestan / Lori	Iran	33.465	48.339	1240K pulldown padded to 3.2M snpset	HumanOrigins	..	..	..	565459	M	..	..	..	..	..	..	..	..	..	..	PASS	..
PV011.HO	PV011	..	..	2016	LazaridisNature2016	Modern	0	0	present	..	Iranian.HO	Khoramabad / Lorestan / Lori	Iran	33.465	48.339	1240K pulldown padded to 3.2M snpset	HumanOrigins	..	..	..	586034	M	..	..	..	..	..	..	..	..	..	..	PASS	..
PV012.HO	PV012	..	..	2016	LazaridisNature2016	Modern	0	0	present	..	Iranian.HO	Khoramabad / Lorestan / Lori	Iran	33.465	48.339	1240K pulldown padded to 3.2M snpset	HumanOrigins	..	..	..	586529	M	..	..	..	..	..	..	..	..	..	..	PASS	..
PV013.HO	PV013	..	..	2016	LazaridisNature2016	Modern	0	0	present	..	Iranian.HO	Khoramabad / Lorestan / Lori	Iran	33.465	48.339	1240K pulldown padded to 3.2M snpset	HumanOrigins	..	..	..	586049	M	..	..	..	..	..	..	..	..	..	..	PASS	..
PV014.HO	PV014	..	..	2016	LazaridisNature2016	Modern	0	0	present	..	Iranian.HO	Khoramabad / Lorestan / Lori	Iran	33.465	48.339	1240K pulldown padded to 3.2M snpset	HumanOrigins	..	..	..	585850	M	..	..	..	..	..	..	..	..	..	..	PASS	..
PV015.HO	PV015	..	..	2016	LazaridisNature2016	Modern	0	0	present	..	Iranian.HO	Khoramabad / Lorestan / Lori	Iran	33.465	48.339	1240K pulldown padded to 3.2M snpset	HumanOrigins	..	..	..	585520	M	..	..	..	..	..	..	..	..	..	..	PASS	..
PV016.HO	PV016	..	..	2016	LazaridisNature2016	Modern	0	0	present	..	Iranian.HO	Khoramabad / Lorestan / Lori	Iran	33.465	48.339	1240K pulldown padded to 3.2M snpset	HumanOrigins	..	..	..	586128	M	..	..	..	..	..	..	..	..	..	..	PASS	..
PV017.HO	PV017	..	..	2016	LazaridisNature2016	Modern	0	0	present	..	Iranian.HO	Khoramabad / Lorestan / Lori	Iran	33.465	48.339	1240K pulldown padded to 3.2M snpset	HumanOrigins	..	..	..	586165	M	..	..	..	..	..	..	..	..	..	..	PASS	..
PV018.HO	PV018	..	..	2016	LazaridisNature2016	Modern	0	0	present	..	Iranian.HO	Khoramabad / Lorestan / Lori	Iran	33.465	48.339	1240K pulldown padded to 3.2M snpset	HumanOrigins	..	..	..	585262	M	..	..	..	..	..	..	..	..	..	..	PASS	..
PV029.HO	PV029	..	..	2016	LazaridisNature2016	Modern	0	0	present	..	Iranian.HO	Shiraz / Fars / Persian	Iran	29.591	52.584	1240K pulldown padded to 3.2M snpset	HumanOrigins	..	..	..	585687	M	..	..	..	..	..	..	..	..	..	..	PASS	..
PV030.HO	PV030	..	..	2016	LazaridisNature2016	Modern	0	0	present	..	Iranian.HO	Shiraz / Fars / Persian	Iran	29.591	52.584	1240K pulldown padded to 3.2M snpset	HumanOrigins	..	..	..	585637	M	..	..	..	..	..	..	..	..	..	..	PASS	..
PV031.HO	PV031	..	..	2016	LazaridisNature2016	Modern	0	0	present	..	Iranian.HO	Shiraz / Fars / Persian	Iran	29.591	52.584	1240K pulldown padded to 3.2M snpset	HumanOrigins	..	..	..	584298	M	..	..	..	..	..	..	..	..	..	..	PASS	..
PV032.HO	PV032	..	..	2016	LazaridisNature2016	Modern	0	0	present	..	Iranian.HO	Shiraz / Fars / Persian	Iran	29.591	52.584	1240K pulldown padded to 3.2M snpset	HumanOrigins	..	..	..	584291	M	..	..	..	..	..	..	..	..	..	..	PASS	..
PV033.HO	PV033	..	..	2016	LazaridisNature2016	Modern	0	0	present	..	Iranian.HO	Shiraz / Fars / Persian	Iran	29.591	52.584	1240K pulldown padded to 3.2M snpset	HumanOrigins	..	..	..	585583	M	..	..	..	..	..	..	..	..	..	..	PASS	..
PV034.HO	PV034	..	..	2016	LazaridisNature2016	Modern	0	0	present	..	Iranian.HO	Shiraz / Fars / Persian	Iran	29.591	52.584	1240K pulldown padded to 3.2M snpset	HumanOrigins	..	..	..	585601	M	..	..	..	..	..	..	..	..	..	..	PASS	..
PV035.HO	PV035	..	..	2016	LazaridisNature2016	Modern	0	0	present	..	Iranian.HO	Shiraz / Fars / Persian	Iran	29.591	52.584	1240K pulldown padded to 3.2M snpset	HumanOrigins	..	..	..	583204	M	..	..	..	..	..	..	..	..	..	..	PASS	..
PV036.HO	PV036	..	..	2016	LazaridisNature2016	Modern	0	0	present	..	Iranian.HO	Shiraz / Fars / Persian	Iran	29.591	52.584	1240K pulldown padded to 3.2M snpset	HumanOrigins	..	..	..	583746	M	..	..	..	..	..	..	..	..	..	..	PASS	..
PV037.HO	PV037	..	..	2016	LazaridisNature2016	Modern	0	0	present	..	Iranian.HO	Shiraz / Fars / Persian	Iran	29.591	52.584	1240K pulldown padded to 3.2M snpset	HumanOrigins	..	..	..	585939	M	..	..	..	..	..	..	..	..	..	..	PASS	..
PV038.HO	PV038	..	..	2016	LazaridisNature2016	Modern	0	0	present	..	Iranian.HO	Shiraz / Fars / Persian	Iran	29.591	52.584	1240K pulldown padded to 3.2M snpset	HumanOrigins	..	..	..	581882	M	..	..	..	..	..	..	..	..	..	..	PASS	..
A306.HO	A306	..	..	2016	LazaridisNature2016	Modern	0	0	present	..	Romanian.HO	Apuseni mountains, Horea village	Romania	46.5022	22.9503	1240K pulldown padded to 3.2M snpset	HumanOrigins	..	..	..	586701	F	..	n/a (female)	n/a (female)	..	..	..	..	..	..	..	PASS	..
A325.HO	A325	..	..	2016	LazaridisNature2016	Modern	0	0	present	..	Romanian.HO	Apuseni mountains, Horea village	Romania	46.5022	22.9503	1240K pulldown padded to 3.2M snpset	HumanOrigins	..	..	..	584639	F	..	n/a (female)	n/a (female)	..	..	..	..	..	..	..	PASS	..
A343.HO	A343	..	..	2016	LazaridisNature2016	Modern	0	0	present	..	Romanian.HO	Apuseni mountains, Horea village	Romania	46.5022	22.9503	1240K pulldown padded to 3.2M snpset	HumanOrigins	..	..	..	586532	F	..	n/a (female)	n/a (female)	..	..	..	..	..	..	..	PASS	..
A362.HO	A362	..	..	2016	LazaridisNature2016	Modern	0	0	present	..	Romanian.HO	Apuseni mountains, Horea village	Romania	46.5022	22.9503	1240K pulldown padded to 3.2M snpset	HumanOrigins	..	..	..	586637	F	..	n/a (female)	n/a (female)	..	..	..	..	..	..	..	PASS	..
A374.HO	A374	..	..	2016	LazaridisNature2016	Modern	0	0	present	..	Romanian.HO	Apuseni mountains, Horea village	Romania	46.5022	22.9503	1240K pulldown padded to 3.2M snpset	HumanOrigins	..	..	..	586351	F	..	n/a (female)	n/a (female)	..	..	..	..	..	..	..	PASS	..
Assyrian151.HO	Assyrian151	..	..	2016	LazaridisNature2016	Modern	0	0	present	..	Assyrian.HO	Jilu, Hakk√¢ri	Turkey	37.47	43.94	1240K pulldown padded to 3.2M snpset	HumanOrigins	..	..	..	584159	F	..	n/a (female)	n/a (female)	..	..	..	..	..	..	..	PASS	..
Assyrian152.HO	Assyrian152	..	..	2016	LazaridisNature2016	Modern	0	0	present	..	Assyrian.HO	√áukurca, Hakk√¢ri	Turkey	37.28	43.54	1240K pulldown padded to 3.2M snpset	HumanOrigins	..	..	..	586601	M	..	..	..	..	..	..	..	..	..	..	PASS	..
Assyrian153.HO	Assyrian153	..	..	2016	LazaridisNature2016	Modern	0	0	present	..	Assyrian.HO	Gawar, Hakk√¢ri	Turkey	37.56	44.28	1240K pulldown padded to 3.2M snpset	HumanOrigins	..	..	..	586667	M	..	..	..	..	..	..	..	..	..	..	PASS	..
Assyrian155.HO	Assyrian155	..	..	2016	LazaridisNature2016	Modern	0	0	present	..	Assyrian.HO	Mosul	Iraq	36.34	43.13	1240K pulldown padded to 3.2M snpset	HumanOrigins	..	..	..	586409	M	..	..	..	..	..	..	..	..	..	..	PASS	..
Assyrian159.HO	Assyrian159	..	..	2016	LazaridisNature2016	Modern	0	0	present	..	Assyrian.HO	Bibad, Amadiya	Iraq	37.1	43.45	1240K pulldown padded to 3.2M snpset	HumanOrigins	..	..	..	586714	F	..	n/a (female)	n/a (female)	..	..	..	..	..	..	..	PASS	..
Assyrian160.HO	Assyrian160	..	..	2016	LazaridisNature2016	Modern	0	0	present	..	Assyrian.HO	Gug Tappeh, Urmia	Iran	37.51	45.14	1240K pulldown padded to 3.2M snpset	HumanOrigins	..	..	..	586763	M	..	..	..	..	..	..	..	..	..	..	PASS	..
Assyrian161.HO	Assyrian161	..	..	2016	LazaridisNature2016	Modern	0	0	present	..	Assyrian.HO	Adeh, Urmia	Iran	37.7	45.18	1240K pulldown padded to 3.2M snpset	HumanOrigins	..	..	..	586713	M	..	..	..	..	..	..	..	..	..	..	PASS	..
Assyrian162.HO	Assyrian162	..	..	2016	LazaridisNature2016	Modern	0	0	present	..	Assyrian.HO	Shaqlawa, Erbil	Iraq	36.4	44.32	1240K pulldown padded to 3.2M snpset	HumanOrigins	..	..	..	586642	M	..	..	..	..	..	..	..	..	..	..	PASS	..
Assyrian163.HO	Assyrian163	..	..	2016	LazaridisNature2016	Modern	0	0	present	..	Assyrian.HO	Gawar, Hakk√¢ri	Turkey	37.56	44.28	1240K pulldown padded to 3.2M snpset	HumanOrigins	..	..	..	586296	F	..	n/a (female)	n/a (female)	..	..	..	..	..	..	..	PASS	..
Assyrian164.HO	Assyrian164	..	..	2016	LazaridisNature2016	Modern	0	0	present	..	Assyrian.HO	Urmia	Iran	37.54	45.06	1240K pulldown padded to 3.2M snpset	HumanOrigins	..	..	..	586671	M	..	..	..	..	..	..	..	..	..	..	PASS	..
Assyrian165.HO	Assyrian165	..	..	2016	LazaridisNature2016	Modern	0	0	present	..	Assyrian.HO	Jilu, Hakk√¢ri	Turkey	37.47	43.94	1240K pulldown padded to 3.2M snpset	HumanOrigins	..	..	..	586745	F	..	n/a (female)	n/a (female)	..	..	..	..	..	..	..	PASS	..
G408.HO	G408	..	..	2016	LazaridisNature2016	Modern	0	0	present	..	Romanian.HO	Gorj county, Tismana village	Romania	45.0506	22.9489	1240K pulldown padded to 3.2M snpset	HumanOrigins	..	..	..	586381	F	..	n/a (female)	n/a (female)	..	..	..	..	..	..	..	PASS	..
G421.HO	G421	..	..	2016	LazaridisNature2016	Modern	0	0	present	..	Romanian.HO	Gorj county, Tismana village	Romania	45.0506	22.9489	1240K pulldown padded to 3.2M snpset	HumanOrigins	..	..	..	586607	F	..	n/a (female)	n/a (female)	..	..	..	..	..	..	..	PASS	..
G428.HO	G428	..	..	2016	LazaridisNature2016	Modern	0	0	present	..	Romanian.HO	Gorj county, Tismana village	Romania	45.0506	22.9489	1240K pulldown padded to 3.2M snpset	HumanOrigins	..	..	..	586010	F	..	n/a (female)	n/a (female)	..	..	..	..	..	..	..	PASS	..
G429.HO	G429	..	..	2016	LazaridisNature2016	Modern	0	0	present	..	Romanian.HO	Gorj county, Tismana village	Romania	45.0506	22.9489	1240K pulldown padded to 3.2M snpset	HumanOrigins	..	..	..	585524	F	..	n/a (female)	n/a (female)	..	..	..	..	..	..	..	PASS	..
G434.HO	G434	..	..	2016	LazaridisNature2016	Modern	0	0	present	..	Romanian.HO	Gorj county, Tismana village	Romania	45.0506	22.9489	1240K pulldown padded to 3.2M snpset	HumanOrigins	..	..	..	586406	F	..	n/a (female)	n/a (female)	..	..	..	..	..	..	..	PASS	..
ALB126.HO	ALB126	..	..	2019	BiaginiEJHG2019	Modern	0	0	present	..	Spanish.HO	Valencian Community, Val√®ncia	Spain	39.5776	-0.435621	1240K pulldown padded to 3.2M snpset	HumanOrigins	..	..	..	554054	M	..	..	..	..	..	..	..	..	..	..	PASS	..
ALB231.HO	ALB231	..	..	2019	BiaginiEJHG2019	Modern	0	0	present	..	Spanish.HO	Valencian Community, Castell√≥	Spain	40.3303	-0.0937125	1240K pulldown padded to 3.2M snpset	HumanOrigins	..	..	..	551682	M	..	..	..	..	..	..	..	..	..	..	PASS	..
ALB389.HO	ALB389	..	..	2019	BiaginiEJHG2019	Modern	0	0	present	..	Spanish.HO	Valencian Community, Val√®ncia	Spain	39.1212	-0.449682	1240K pulldown padded to 3.2M snpset	HumanOrigins	..	..	..	552707	M	..	..	..	..	..	..	..	..	..	..	PASS	..
ALE005.HO	ALE005	..	..	2019	BiaginiEJHG2019	Modern	0	0	present	..	Spanish.HO	Valencian Community, Alacant	Spain	38.8327	-0.169887	1240K pulldown padded to 3.2M snpset	HumanOrigins	..	..	..	547830	M	..	..	..	..	..	..	..	..	..	..	PASS	..
ALE009.HO	ALE009	..	..	2019	BiaginiEJHG2019	Modern	0	0	present	..	Spanish.HO	Valencian Community, Alacant	Spain	38.8018	-0.100248	1240K pulldown padded to 3.2M snpset	HumanOrigins	..	..	..	553095	M	..	..	..	..	..	..	..	..	..	..	PASS	..
ALE088.HO	ALE088	..	..	2019	BiaginiEJHG2019	Modern	0	0	present	..	Spanish.HO	Catalonia, Pened√®s	Spain	41.5313	1.62349	1240K pulldown padded to 3.2M snpset	HumanOrigins	..	..	..	554785	M	..	..	..	..	..	..	..	..	..	..	PASS	..
ALE339.HO	ALE339	..	..	2019	BiaginiEJHG2019	Modern	0	0	present	..	Spanish.HO	Balearic Islands, Eivissa	Spain	39.5745	2.4202	1240K pulldown padded to 3.2M snpset	HumanOrigins	..	..	..	554196	M	..	..	..	..	..	..	..	..	..	..	PASS	..
ARM005.HO	ARM005	..	..	2019	BiaginiEJHG2019	Modern	0	0	present	..	Spanish.HO	Catalonia, Peri-Barcelona	Spain	41.3911	2.00961	1240K pulldown padded to 3.2M snpset	HumanOrigins	..	..	..	553529	M	..	..	..	..	..	..	..	..	..	..	PASS	..
BON076.HO	BON076	..	..	2019	BiaginiEJHG2019	Modern	0	0	present	..	Spanish.HO	Valencian Community, Val√®ncia	Spain	39.4702	-0.376805	1240K pulldown padded to 3.2M snpset	HumanOrigins	..	..	..	549228	M	..	..	..	..	..	..	..	..	..	..	PASS	..
BOS010.HO	BOS010	..	..	2019	BiaginiEJHG2019	Modern	0	0	present	..	Spanish.HO	Valencian Community, Val√®ncia	Spain	39.4965	-0.745201	1240K pulldown padded to 3.2M snpset	HumanOrigins	..	..	..	552132	M	..	..	..	..	..	..	..	..	..	..	PASS	..
BOS011.HO	BOS011	..	..	2019	BiaginiEJHG2019	Modern	0	0	present	..	Spanish.HO	Catalonia, Girona	Spain	42.3232	2.94939	1240K pulldown padded to 3.2M snpset	HumanOrigins	..	..	..	554238	M	..	..	..	..	..	..	..	..	..	..	PASS	..
BOS015.HO	BOS015	..	..	2019	BiaginiEJHG2019	Modern	0	0	present	..	Spanish.HO	Catalonia, Pened√®s	Spain	41.2348	1.81122	1240K pulldown padded to 3.2M snpset	HumanOrigins	..	..	..	554639	M	..	..	..	..	..	..	..	..	..	..	PASS	..
BOS027.HO	BOS027	..	..	2019	BiaginiEJHG2019	Modern	0	0	present	..	Spanish.HO	Valencian Community, Castell√≥	Spain	40.0728	-0.213024	1240K pulldown padded to 3.2M snpset	HumanOrigins	..	..	..	549526	M	..	..	..	..	..	..	..	..	..	..	PASS	..
BOS029.HO	BOS029	..	..	2019	BiaginiEJHG2019	Modern	0	0	present	..	Spanish.HO	Catalonia, Peri-Barcelona	Spain	41.3474	2.0431	1240K pulldown padded to 3.2M snpset	HumanOrigins	..	..	..	553546	M	..	..	..	..	..	..	..	..	..	..	PASS	..
CAL026.HO	CAL026	..	..	2019	BiaginiEJHG2019	Modern	0	0	present	..	Spanish.HO	Balearic Islands, Eivissa	Spain	39.5527	2.59463	1240K pulldown padded to 3.2M snpset	HumanOrigins	..	..	..	554902	M	..	..	..	..	..	..	..	..	..	..	PASS	..
CAL053.HO	CAL053	..	..	2019	BiaginiEJHG2019	Modern	0	0	present	..	Spanish.HO	Catalonia, Peri-Barcelona	Spain	41.5465	2.42292	1240K pulldown padded to 3.2M snpset	HumanOrigins	..	..	..	553156	M	..	..	..	..	..	..	..	..	..	..	PASS	..
CAL107.HO	CAL107	..	..	2019	BiaginiEJHG2019	Modern	0	0	present	..	Spanish.HO	Catalonia, Catalunya Central	Spain	41.7353	1.78477	1240K pulldown padded to 3.2M snpset	HumanOrigins	..	..	..	555061	M	..	..	..	..	..	..	..	..	..	..	PASS	..
CAR007.HO	CAR007	..	..	2019	BiaginiEJHG2019	Modern	0	0	present	..	Spanish.HO	Catalonia, Catalunya Central	Spain	41.9956	1.50437	1240K pulldown padded to 3.2M snpset	HumanOrigins	..	..	..	555012	M	..	..	..	..	..	..	..	..	..	..	PASS	..
CAR016.HO	CAR016	..	..	2019	BiaginiEJHG2019	Modern	0	0	present	..	Spanish.HO	Catalonia, Pirineu	Spain	42.3993	1.02081	1240K pulldown padded to 3.2M snpset	HumanOrigins	..	..	..	555082	M	..	..	..	..	..	..	..	..	..	..	PASS	..
CAR023.HO	CAR023	..	..	2019	BiaginiEJHG2019	Modern	0	0	present	..	Spanish.HO	Valencian Community, Castell√≥	Spain	40.6029	0.0462348	1240K pulldown padded to 3.2M snpset	HumanOrigins	..	..	..	555116	M	..	..	..	..	..	..	..	..	..	..	PASS	..
CAR048.HO	CAR048	..	..	2019	BiaginiEJHG2019	Modern	0	0	present	..	Spanish.HO	Catalonia, Catalunya Central	Spain	42.0016	1.54159	1240K pulldown padded to 3.2M snpset	HumanOrigins	..	..	..	555119	M	..	..	..	..	..	..	..	..	..	..	PASS	..
CAR200.HO	CAR200	..	..	2019	BiaginiEJHG2019	Modern	0	0	present	..	Spanish.HO	Valencian Community, Castell√≥	Spain	40.613	0.176968	1240K pulldown padded to 3.2M snpset	HumanOrigins	..	..	..	555029	M	..	..	..	..	..	..	..	..	..	..	PASS	..
CAR212.HO	CAR212	..	..	2019	BiaginiEJHG2019	Modern	0	0	present	..	Spanish.HO	Catalonia, Pirineu	Spain	42.3001	0.936141	1240K pulldown padded to 3.2M snpset	HumanOrigins	..	..	..	554858	M	..	..	..	..	..	..	..	..	..	..	PASS	..
CAR256.HO	CAR256	..	..	2019	BiaginiEJHG2019	Modern	0	0	present	..	Spanish.HO	Balearic Islands, Eivissa	Spain	38.9489	1.39264	1240K pulldown padded to 3.2M snpset	HumanOrigins	..	..	..	554964	M	..	..	..	..	..	..	..	..	..	..	PASS	..
CAR257.HO	CAR257	..	..	2019	BiaginiEJHG2019	Modern	0	0	present	..	Spanish.HO	Valencian Community, Alacant	Spain	38.7162	0.0533722	1240K pulldown padded to 3.2M snpset	HumanOrigins	..	..	..	554994	M	..	..	..	..	..	..	..	..	..	..	PASS	..
COD068.HO	COD068	..	..	2019	BiaginiEJHG2019	Modern	0	0	present	..	Spanish.HO	Catalonia, Catalunya Central	Spain	42.0056	2.22134	1240K pulldown padded to 3.2M snpset	HumanOrigins	..	..	..	553801	M	..	..	..	..	..	..	..	..	..	..	PASS	..
COD147.HO	COD147	..	..	2019	BiaginiEJHG2019	Modern	0	0	present	..	Spanish.HO	Catalonia, Barcelon√®s	Spain	41.3879	2.16992	1240K pulldown padded to 3.2M snpset	HumanOrigins	..	..	..	554342	M	..	..	..	..	..	..	..	..	..	..	PASS	..
COM032.HO	COM032	..	..	2019	BiaginiEJHG2019	Modern	0	0	present	..	Spanish.HO	Catalonia, Peri-Barcelona	Spain	41.5375	2.44528	1240K pulldown padded to 3.2M snpset	HumanOrigins	..	..	..	554986	M	..	..	..	..	..	..	..	..	..	..	PASS	..
DAN072.HO	DAN072	..	..	2019	BiaginiEJHG2019	Modern	0	0	present	..	Spanish.HO	Catalonia, Girona	Spain	42.263	3.17481	1240K pulldown padded to 3.2M snpset	HumanOrigins	..	..	..	554867	M	..	..	..	..	..	..	..	..	..	..	PASS	..
EST038.HO	EST038	..	..	2019	BiaginiEJHG2019	Modern	0	0	present	..	Spanish.HO	Valencian Community, Val√®ncia	Spain	38.922	-0.222493	1240K pulldown padded to 3.2M snpset	HumanOrigins	..	..	..	554511	M	..	..	..	..	..	..	..	..	..	..	PASS	..
EST093.HO	EST093	..	..	2019	BiaginiEJHG2019	Modern	0	0	present	..	Spanish.HO	Valencian Community, Val√®ncia	Spain	38.8526	-0.644795	1240K pulldown padded to 3.2M snpset	HumanOrigins	..	..	..	554826	M	..	..	..	..	..	..	..	..	..	..	PASS	..
FER007.HO	FER007	..	..	2019	BiaginiEJHG2019	Modern	0	0	present	..	Spanish.HO	Catalonia, Lleida	Spain	41.5641	1.18443	1240K pulldown padded to 3.2M snpset	HumanOrigins	..	..	..	554840	M	..	..	..	..	..	..	..	..	..	..	PASS	..
FER015.HO	FER015	..	..	2019	BiaginiEJHG2019	Modern	0	0	present	..	Spanish.HO	Catalonia, Lleida	Spain	41.5481	0.82541	1240K pulldown padded to 3.2M snpset	HumanOrigins	..	..	..	551147	M	..	..	..	..	..	..	..	..	..	..	PASS	..
FER023.HO	FER023	..	..	2019	BiaginiEJHG2019	Modern	0	0	present	..	Spanish.HO	Catalonia, Pened√®s	Spain	41.611	1.59314	1240K pulldown padded to 3.2M snpset	HumanOrigins	..	..	..	543622	M	..	..	..	..	..	..	..	..	..	..	PASS	..
FER033.HO	FER033	..	..	2019	BiaginiEJHG2019	Modern	0	0	present	..	Spanish.HO	Valencian Community, Castell√≥	Spain	40.6138	0.252883	1240K pulldown padded to 3.2M snpset	HumanOrigins	..	..	..	554844	M	..	..	..	..	..	..	..	..	..	..	PASS	..
FER039.HO	FER039	..	..	2019	BiaginiEJHG2019	Modern	0	0	present	..	Spanish.HO	Catalonia, Camp de Tarragona	Spain	41.1548	1.10868	1240K pulldown padded to 3.2M snpset	HumanOrigins	..	..	..	543958	M	..	..	..	..	..	..	..	..	..	..	PASS	..
FER052.HO	FER052	..	..	2019	BiaginiEJHG2019	Modern	0	0	present	..	Spanish.HO	Catalonia, Girona	Spain	41.8536	2.81532	1240K pulldown padded to 3.2M snpset	HumanOrigins	..	..	..	554945	M	..	..	..	..	..	..	..	..	..	..	PASS	..
FER054.HO	FER054	..	..	2019	BiaginiEJHG2019	Modern	0	0	present	..	Spanish.HO	Balearic Islands, Eivissa	Spain	40.0015	3.8375	1240K pulldown padded to 3.2M snpset	HumanOrigins	..	..	..	553503	M	..	..	..	..	..	..	..	..	..	..	PASS	..
FER097.HO	FER097	..	..	2019	BiaginiEJHG2019	Modern	0	0	present	..	Spanish.HO	Valencian Community, Val√®ncia	Spain	39.5264	-0.352794	1240K pulldown padded to 3.2M snpset	HumanOrigins	..	..	..	554263	M	..	..	..	..	..	..	..	..	..	..	PASS	..
FER101.HO	FER101	..	..	2019	BiaginiEJHG2019	Modern	0	0	present	..	Spanish.HO	Catalonia, Pirineu	Spain	42.5783	1.09994	1240K pulldown padded to 3.2M snpset	HumanOrigins	..	..	..	550257	M	..	..	..	..	..	..	..	..	..	..	PASS	..
FOR066.HO	FOR066	..	..	2019	BiaginiEJHG2019	Modern	0	0	present	..	Spanish.HO	Catalonia, Lleida	Spain	41.8816	0.731338	1240K pulldown padded to 3.2M snpset	HumanOrigins	..	..	..	553555	M	..	..	..	..	..	..	..	..	..	..	PASS	..
FOR067.HO	FOR067	..	..	2019	BiaginiEJHG2019	Modern	0	0	present	..	Spanish.HO	Catalonia, Camp de Tarragona	Spain	41.1386	1.05581	1240K pulldown padded to 3.2M snpset	HumanOrigins	..	..	..	554834	M	..	..	..	..	..	..	..	..	..	..	PASS	..
FOR094.HO	FOR094	..	..	2019	BiaginiEJHG2019	Modern	0	0	present	..	Spanish.HO	Catalonia, Camp de Tarragona	Spain	41.1677	0.976	1240K pulldown padded to 3.2M snpset	HumanOrigins	..	..	..	548884	M	..	..	..	..	..	..	..	..	..	..	PASS	..
GRA011.HO	GRA011	..	..	2019	BiaginiEJHG2019	Modern	0	0	present	..	Spanish.HO	Catalonia, Camp de Tarragona	Spain	41.3701	1.32111	1240K pulldown padded to 3.2M snpset	HumanOrigins	..	..	..	549485	M	..	..	..	..	..	..	..	..	..	..	PASS	..
GRA016.HO	GRA016	..	..	2019	BiaginiEJHG2019	Modern	0	0	present	..	Spanish.HO	Valencian Community, Val√®ncia	Spain	39.0717	-0.267715	1240K pulldown padded to 3.2M snpset	HumanOrigins	..	..	..	554697	M	..	..	..	..	..	..	..	..	..	..	PASS	..
GRA020.HO	GRA020	..	..	2019	BiaginiEJHG2019	Modern	0	0	present	..	Spanish.HO	Catalonia, Terres de l'Ebre	Spain	40.5448	0.481191	1240K pulldown padded to 3.2M snpset	HumanOrigins	..	..	..	553500	M	..	..	..	..	..	..	..	..	..	..	PASS	..
GRA029.HO	GRA029	..	..	2019	BiaginiEJHG2019	Modern	0	0	present	..	Spanish.HO	Catalonia, Pirineu	Spain	42.3499	1.67522	1240K pulldown padded to 3.2M snpset	HumanOrigins	..	..	..	554884	M	..	..	..	..	..	..	..	..	..	..	PASS	..
GRA035.HO	GRA035	..	..	2019	BiaginiEJHG2019	Modern	0	0	present	..	Spanish.HO	Catalonia, Camp de Tarragona	Spain	41.3862	1.0884	1240K pulldown padded to 3.2M snpset	HumanOrigins	..	..	..	553378	M	..	..	..	..	..	..	..	..	..	..	PASS	..
GRA135.HO	GRA135	..	..	2019	BiaginiEJHG2019	Modern	0	0	present	..	Spanish.HO	Balearic Islands, Eivissa	Spain	39.5999	2.9594	1240K pulldown padded to 3.2M snpset	HumanOrigins	..	..	..	555061	M	..	..	..	..	..	..	..	..	..	..	PASS	..
GUL190.HO	GUL190	..	..	2019	BiaginiEJHG2019	Modern	0	0	present	..	Spanish.HO	Catalonia, Camp de Tarragona	Spain	41.1445	1.3971	1240K pulldown padded to 3.2M snpset	HumanOrigins	..	..	..	555064	M	..	..	..	..	..	..	..	..	..	..	PASS	..
GUS007.HO	GUS007	..	..	2019	BiaginiEJHG2019	Modern	0	0	present	..	Spanish.HO	Balearic Islands, Eivissa	Spain	40.0015	3.8375	1240K pulldown padded to 3.2M snpset	HumanOrigins	..	..	..	554988	M	..	..	..	..	..	..	..	..	..	..	PASS	..
GUS008.HO	GUS008	..	..	2019	BiaginiEJHG2019	Modern	0	0	present	..	Spanish.HO	Catalonia, Terres de l'Ebre	Spain	40.8204	0.498305	1240K pulldown padded to 3.2M snpset	HumanOrigins	..	..	..	555164	M	..	..	..	..	..	..	..	..	..	..	PASS	..
GUS014.HO	GUS014	..	..	2019	BiaginiEJHG2019	Modern	0	0	present	..	Spanish.HO	Catalonia, Lleida	Spain	41.5571	1.02216	1240K pulldown padded to 3.2M snpset	HumanOrigins	..	..	..	554144	M	..	..	..	..	..	..	..	..	..	..	PASS	..
GUS029.HO	GUS029	..	..	2019	BiaginiEJHG2019	Modern	0	0	present	..	Spanish.HO	Catalonia, Pened√®s	Spain	41.3727	1.94773	1240K pulldown padded to 3.2M snpset	HumanOrigins	..	..	..	554976	M	..	..	..	..	..	..	..	..	..	..	PASS	..
GUS036.HO	GUS036	..	..	2019	BiaginiEJHG2019	Modern	0	0	present	..	Spanish.HO	Catalonia, Lleida	Spain	41.5404	0.918498	1240K pulldown padded to 3.2M snpset	HumanOrigins	..	..	..	555017	M	..	..	..	..	..	..	..	..	..	..	PASS	..
GUS040.HO	GUS040	..	..	2019	BiaginiEJHG2019	Modern	0	0	present	..	Spanish.HO	Catalonia, Barcelon√®s	Spain	41.3879	2.16992	1240K pulldown padded to 3.2M snpset	HumanOrigins	..	..	..	555084	M	..	..	..	..	..	..	..	..	..	..	PASS	..
GUS119.HO	GUS119	..	..	2019	BiaginiEJHG2019	Modern	0	0	present	..	Spanish.HO	Catalonia, Barcelon√®s	Spain	41.3879	2.16992	1240K pulldown padded to 3.2M snpset	HumanOrigins	..	..	..	555017	M	..	..	..	..	..	..	..	..	..	..	PASS	..
GUS199.HO	GUS199	..	..	2019	BiaginiEJHG2019	Modern	0	0	present	..	Spanish.HO	Balearic Islands, Eivissa	Spain	39.0335	1.56496	1240K pulldown padded to 3.2M snpset	HumanOrigins	..	..	..	552316	M	..	..	..	..	..	..	..	..	..	..	PASS	..
GUS202.HO	GUS202	..	..	2019	BiaginiEJHG2019	Modern	0	0	present	..	Spanish.HO	Catalonia, Camp de Tarragona	Spain	41.4116	1.16824	1240K pulldown padded to 3.2M snpset	HumanOrigins	..	..	..	553200	M	..	..	..	..	..	..	..	..	..	..	PASS	..
GUS203.HO	GUS203	..	..	2019	BiaginiEJHG2019	Modern	0	0	present	..	Spanish.HO	Balearic Islands, Eivissa	Spain	38.9853	1.535	1240K pulldown padded to 3.2M snpset	HumanOrigins	..	..	..	552097	M	..	..	..	..	..	..	..	..	..	..	PASS	..
MAS003.HO	MAS003	..	..	2019	BiaginiEJHG2019	Modern	0	0	present	..	Spanish.HO	Catalonia, Catalunya Central	Spain	41.7435	1.8562	1240K pulldown padded to 3.2M snpset	HumanOrigins	..	..	..	543371	M	..	..	..	..	..	..	..	..	..	..	PASS	..
MAS016.HO	MAS016	..	..	2019	BiaginiEJHG2019	Modern	0	0	present	..	Spanish.HO	Catalonia, Peri-Barcelona	Spain	41.5462	2.45455	1240K pulldown padded to 3.2M snpset	HumanOrigins	..	..	..	552745	M	..	..	..	..	..	..	..	..	..	..	PASS	..
MAS064.HO	MAS064	..	..	2019	BiaginiEJHG2019	Modern	0	0	present	..	Spanish.HO	Valencian Community, Alacant	Spain	38.1658	-0.579218	1240K pulldown padded to 3.2M snpset	HumanOrigins	..	..	..	553151	M	..	..	..	..	..	..	..	..	..	..	PASS	..
MAY035.HO	MAY035	..	..	2019	BiaginiEJHG2019	Modern	0	0	present	..	Spanish.HO	Balearic Islands, Eivissa	Spain	39.7195	2.9079	1240K pulldown padded to 3.2M snpset	HumanOrigins	..	..	..	554698	M	..	..	..	..	..	..	..	..	..	..	PASS	..
MEL022.HO	MEL022	..	..	2019	BiaginiEJHG2019	Modern	0	0	present	..	Spanish.HO	Balearic Islands, Eivissa	Spain	39.6494	3.29922	1240K pulldown padded to 3.2M snpset	HumanOrigins	..	..	..	549455	M	..	..	..	..	..	..	..	..	..	..	PASS	..
MIQ133.HO	MIQ133	..	..	2019	BiaginiEJHG2019	Modern	0	0	present	..	Spanish.HO	Catalonia, Lleida	Spain	41.6649	0.987946	1240K pulldown padded to 3.2M snpset	HumanOrigins	..	..	..	555088	M	..	..	..	..	..	..	..	..	..	..	PASS	..
MOR061.HO	MOR061	..	..	2019	BiaginiEJHG2019	Modern	0	0	present	..	Spanish.HO	Catalonia, Girona	Spain	41.848	2.51263	1240K pulldown padded to 3.2M snpset	HumanOrigins	..	..	..	552920	M	..	..	..	..	..	..	..	..	..	..	PASS	..
MOR068.HO	MOR068	..	..	2019	BiaginiEJHG2019	Modern	0	0	present	..	Spanish.HO	Catalonia, Peri-Barcelona	Spain	41.6519	2.34428	1240K pulldown padded to 3.2M snpset	HumanOrigins	..	..	..	555028	M	..	..	..	..	..	..	..	..	..	..	PASS	..
MST073.HO	MST073	..	..	2019	BiaginiEJHG2019	Modern	0	0	present	..	Spanish.HO	Balearic Islands, Eivissa	Spain	39.5698	3.2095	1240K pulldown padded to 3.2M snpset	HumanOrigins	..	..	..	555009	M	..	..	..	..	..	..	..	..	..	..	PASS	..
MST075.HO	MST075	..	..	2019	BiaginiEJHG2019	Modern	0	0	present	..	Spanish.HO	Catalonia, Lleida	Spain	41.4873	0.842773	1240K pulldown padded to 3.2M snpset	HumanOrigins	..	..	..	554895	M	..	..	..	..	..	..	..	..	..	..	PASS	..
NAC135.HO	NAC135	..	..	2019	BiaginiEJHG2019	Modern	0	0	present	..	Spanish.HO	Valencian Community, Alacant	Spain	38.7733	-0.521809	1240K pulldown padded to 3.2M snpset	HumanOrigins	..	..	..	549888	M	..	..	..	..	..	..	..	..	..	..	PASS	..
PIT001.HO	PIT001	..	..	2019	BiaginiEJHG2019	Modern	0	0	present	..	Spanish.HO	Valencian Community, Castell√≥	Spain	40.0745	-0.037372	1240K pulldown padded to 3.2M snpset	HumanOrigins	..	..	..	555219	M	..	..	..	..	..	..	..	..	..	..	PASS	..
PON058.HO	PON058	..	..	2019	BiaginiEJHG2019	Modern	0	0	present	..	Spanish.HO	Balearic Islands, Eivissa	Spain	39.9734	3.94342	1240K pulldown padded to 3.2M snpset	HumanOrigins	..	..	..	554343	M	..	..	..	..	..	..	..	..	..	..	PASS	..
RAG111.HO	RAG111	..	..	2019	BiaginiEJHG2019	Modern	0	0	present	..	Spanish.HO	Catalonia, Terres de l'Ebre	Spain	40.5974	0.442843	1240K pulldown padded to 3.2M snpset	HumanOrigins	..	..	..	554849	M	..	..	..	..	..	..	..	..	..	..	PASS	..
REI087.HO	REI087	..	..	2019	BiaginiEJHG2019	Modern	0	0	present	..	Spanish.HO	Catalonia, Girona	Spain	42.225	2.43932	1240K pulldown padded to 3.2M snpset	HumanOrigins	..	..	..	553441	M	..	..	..	..	..	..	..	..	..	..	PASS	..
RIC076.HO	RIC076	..	..	2019	BiaginiEJHG2019	Modern	0	0	present	..	Spanish.HO	Catalonia, Lleida	Spain	41.7094	1.02927	1240K pulldown padded to 3.2M snpset	HumanOrigins	..	..	..	554896	M	..	..	..	..	..	..	..	..	..	..	PASS	..
RIC106.HO	RIC106	..	..	2019	BiaginiEJHG2019	Modern	0	0	present	..	Spanish.HO	Catalonia, Peri-Barcelona	Spain	41.4823	2.1885	1240K pulldown padded to 3.2M snpset	HumanOrigins	..	..	..	554578	M	..	..	..	..	..	..	..	..	..	..	PASS	..
ROB016.HO	ROB016	..	..	2019	BiaginiEJHG2019	Modern	0	0	present	..	Spanish.HO	Catalonia, Pened√®s	Spain	41.2504	1.76296	1240K pulldown padded to 3.2M snpset	HumanOrigins	..	..	..	553684	M	..	..	..	..	..	..	..	..	..	..	PASS	..
ROB116.HO	ROB116	..	..	2019	BiaginiEJHG2019	Modern	0	0	present	..	Spanish.HO	Catalonia, Girona	Spain	42.1048	2.77949	1240K pulldown padded to 3.2M snpset	HumanOrigins	..	..	..	548361	M	..	..	..	..	..	..	..	..	..	..	PASS	..
ROB127.HO	ROB127	..	..	2019	BiaginiEJHG2019	Modern	0	0	present	..	Spanish.HO	Catalonia, Girona	Spain	41.7807	2.83532	1240K pulldown padded to 3.2M snpset	HumanOrigins	..	..	..	554490	M	..	..	..	..	..	..	..	..	..	..	PASS	..
ROI027.HO	ROI027	..	..	2019	BiaginiEJHG2019	Modern	0	0	present	..	Spanish.HO	Catalonia, Girona	Spain	42.2563	3.08644	1240K pulldown padded to 3.2M snpset	HumanOrigins	..	..	..	553726	M	..	..	..	..	..	..	..	..	..	..	PASS	..
ROI042.HO	ROI042	..	..	2019	BiaginiEJHG2019	Modern	0	0	present	..	Spanish.HO	Catalonia, Peri-Barcelona	Spain	41.4747	1.98141	1240K pulldown padded to 3.2M snpset	HumanOrigins	..	..	..	554439	M	..	..	..	..	..	..	..	..	..	..	PASS	..
ROI096.HO	ROI096	..	..	2019	BiaginiEJHG2019	Modern	0	0	present	..	Spanish.HO	Balearic Islands, Eivissa	Spain	39.5156	3.0239	1240K pulldown padded to 3.2M snpset	HumanOrigins	..	..	..	551907	M	..	..	..	..	..	..	..	..	..	..	PASS	..
ROS005.HO	ROS005	..	..	2019	BiaginiEJHG2019	Modern	0	0	present	..	Spanish_Lleida.HO	Catalonia, Lleida	Spain	41.825	0.993272	1240K pulldown padded to 3.2M snpset	HumanOrigins	..	..	..	555005	M	..	..	..	..	..	..	..	..	..	..	PASS	..
ROS008.HO	ROS008	..	..	2019	BiaginiEJHG2019	Modern	0	0	present	..	Spanish.HO	Catalonia, Peri-Barcelona	Spain	41.3469	2.0381	1240K pulldown padded to 3.2M snpset	HumanOrigins	..	..	..	554212	M	..	..	..	..	..	..	..	..	..	..	PASS	..
ROS025.HO	ROS025	..	..	2019	BiaginiEJHG2019	Modern	0	0	present	..	Spanish.HO	Catalonia, Pened√®s	Spain	41.4833	1.61667	1240K pulldown padded to 3.2M snpset	HumanOrigins	..	..	..	554237	M	..	..	..	..	..	..	..	..	..	..	PASS	..
SAB009.HO	SAB009	..	..	2019	BiaginiEJHG2019	Modern	0	0	present	..	Spanish.HO	Catalonia, Terres de l'Ebre	Spain	41.0027	0.600538	1240K pulldown padded to 3.2M snpset	HumanOrigins	..	..	..	549834	M	..	..	..	..	..	..	..	..	..	..	PASS	..
SAB014.HO	SAB014	..	..	2019	BiaginiEJHG2019	Modern	0	0	present	..	Spanish.HO	Catalonia, Pened√®s	Spain	41.4557	1.75369	1240K pulldown padded to 3.2M snpset	HumanOrigins	..	..	..	554267	M	..	..	..	..	..	..	..	..	..	..	PASS	..
SAB019.HO	SAB019	..	..	2019	BiaginiEJHG2019	Modern	0	0	present	..	Spanish.HO	Valencian Community, Castell√≥	Spain	39.8899	-0.0836936	1240K pulldown padded to 3.2M snpset	HumanOrigins	..	..	..	555025	M	..	..	..	..	..	..	..	..	..	..	PASS	..
SAB131.HO	SAB131	..	..	2019	BiaginiEJHG2019	Modern	0	0	present	..	Spanish.HO	Catalonia, Terres de l'Ebre	Spain	40.9064	0.490617	1240K pulldown padded to 3.2M snpset	HumanOrigins	..	..	..	554603	M	..	..	..	..	..	..	..	..	..	..	PASS	..
SAB137.HO	SAB137	..	..	2019	BiaginiEJHG2019	Modern	0	0	present	..	Spanish.HO	Catalonia, Pirineu	Spain	42.3088	0.970923	1240K pulldown padded to 3.2M snpset	HumanOrigins	..	..	..	553019	M	..	..	..	..	..	..	..	..	..	..	PASS	..
SER011.HO	SER011	..	..	2019	BiaginiEJHG2019	Modern	0	0	present	..	Spanish.HO	Catalonia, Pirineu	Spain	42.3556	1.76142	1240K pulldown padded to 3.2M snpset	HumanOrigins	..	..	..	549734	M	..	..	..	..	..	..	..	..	..	..	PASS	..
SER015.HO	SER015	..	..	2019	BiaginiEJHG2019	Modern	0	0	present	..	Spanish.HO	Catalonia, Barcelon√®s	Spain	41.3879	2.16992	1240K pulldown padded to 3.2M snpset	HumanOrigins	..	..	..	552560	M	..	..	..	..	..	..	..	..	..	..	PASS	..
SER018.HO	SER018	..	..	2019	BiaginiEJHG2019	Modern	0	0	present	..	Spanish.HO	Catalonia, Girona	Spain	42.1821	2.48819	1240K pulldown padded to 3.2M snpset	HumanOrigins	..	..	..	550485	M	..	..	..	..	..	..	..	..	..	..	PASS	..
SER022.HO	SER022	..	..	2019	BiaginiEJHG2019	Modern	0	0	present	..	Spanish.HO	Catalonia, Pened√®s	Spain	41.5266	1.72153	1240K pulldown padded to 3.2M snpset	HumanOrigins	..	..	..	551927	M	..	..	..	..	..	..	..	..	..	..	PASS	..
SER027.HO	SER027	..	..	2019	BiaginiEJHG2019	Modern	0	0	present	..	Spanish.HO	Catalonia, Peri-Barcelona	Spain	41.5556	2.40056	1240K pulldown padded to 3.2M snpset	HumanOrigins	..	..	..	555091	M	..	..	..	..	..	..	..	..	..	..	PASS	..
SER064.HO	SER064	..	..	2019	BiaginiEJHG2019	Modern	0	0	present	..	Spanish.HO	Balearic Islands, Eivissa	Spain	38.7055	1.4283	1240K pulldown padded to 3.2M snpset	HumanOrigins	..	..	..	552762	M	..	..	..	..	..	..	..	..	..	..	PASS	..
SLA017.HO	SLA017	..	..	2019	BiaginiEJHG2019	Modern	0	0	present	..	Spanish.HO	Valencian Community, Alacant	Spain	38.3929	-0.80438	1240K pulldown padded to 3.2M snpset	HumanOrigins	..	..	..	555086	M	..	..	..	..	..	..	..	..	..	..	PASS	..
SLM078.HO	SLM078	..	..	2019	BiaginiEJHG2019	Modern	0	0	present	..	Spanish.HO	Balearic Islands, Eivissa	Spain	39.6609	3.08345	1240K pulldown padded to 3.2M snpset	HumanOrigins	..	..	..	550572	M	..	..	..	..	..	..	..	..	..	..	PASS	..
SOL051.HO	SOL051	..	..	2019	BiaginiEJHG2019	Modern	0	0	present	..	Spanish.HO	Catalonia, Catalunya Central	Spain	41.7656	1.76338	1240K pulldown padded to 3.2M snpset	HumanOrigins	..	..	..	553715	M	..	..	..	..	..	..	..	..	..	..	PASS	..
SOL053.HO	SOL053	..	..	2019	BiaginiEJHG2019	Modern	0	0	present	..	Spanish.HO	Balearic Islands, Eivissa	Spain	39.7609	3.03222	1240K pulldown padded to 3.2M snpset	HumanOrigins	..	..	..	555002	M	..	..	..	..	..	..	..	..	..	..	PASS	..
SOL083.HO	SOL083	..	..	2019	BiaginiEJHG2019	Modern	0	0	present	..	Spanish.HO	Catalonia, Catalunya Central	Spain	41.9804	1.7832	1240K pulldown padded to 3.2M snpset	HumanOrigins	..	..	..	554476	M	..	..	..	..	..	..	..	..	..	..	PASS	..
SOL084.HO	SOL084	..	..	2019	BiaginiEJHG2019	Modern	0	0	present	..	Spanish.HO	Valencian Community, Val√®ncia	Spain	38.9549	-0.456031	1240K pulldown padded to 3.2M snpset	HumanOrigins	..	..	..	548532	M	..	..	..	..	..	..	..	..	..	..	PASS	..
STC091.HO	STC091	..	..	2019	BiaginiEJHG2019	Modern	0	0	present	..	Spanish.HO	Catalonia, Pened√®s	Spain	41.4638	1.66646	1240K pulldown padded to 3.2M snpset	HumanOrigins	..	..	..	554869	M	..	..	..	..	..	..	..	..	..	..	PASS	..
VID003.HO	VID003	..	..	2019	BiaginiEJHG2019	Modern	0	0	present	..	Spanish.HO	Catalonia, Pened√®s	Spain	41.2399	1.57728	1240K pulldown padded to 3.2M snpset	HumanOrigins	..	..	..	553990	M	..	..	..	..	..	..	..	..	..	..	PASS	..
VID014.HO	VID014	..	..	2019	BiaginiEJHG2019	Modern	0	0	present	..	Spanish.HO	Catalonia, Barcelon√®s	Spain	41.4501	2.24742	1240K pulldown padded to 3.2M snpset	HumanOrigins	..	..	..	551453	M	..	..	..	..	..	..	..	..	..	..	PASS	..
VID016.HO	VID016	..	..	2019	BiaginiEJHG2019	Modern	0	0	present	..	Spanish.HO	Catalonia, Girona	Spain	42.0072	2.70466	1240K pulldown padded to 3.2M snpset	HumanOrigins	..	..	..	555078	M	..	..	..	..	..	..	..	..	..	..	PASS	..
VID037.HO	VID037	..	..	2019	BiaginiEJHG2019	Modern	0	0	present	..	Spanish.HO	Catalonia, Pened√®s	Spain	41.7061	1.48652	1240K pulldown padded to 3.2M snpset	HumanOrigins	..	..	..	554921	M	..	..	..	..	..	..	..	..	..	..	PASS	..
VID044.HO	VID044	..	..	2019	BiaginiEJHG2019	Modern	0	0	present	..	Spanish.HO	Catalonia, Catalunya Central	Spain	42.3311	2.2262	1240K pulldown padded to 3.2M snpset	HumanOrigins	..	..	..	554293	M	..	..	..	..	..	..	..	..	..	..	PASS	..
VID048.HO	VID048	..	..	2019	BiaginiEJHG2019	Modern	0	0	present	..	Spanish.HO	Catalonia, Camp de Tarragona	Spain	41.111	1.145	1240K pulldown padded to 3.2M snpset	HumanOrigins	..	..	..	551567	M	..	..	..	..	..	..	..	..	..	..	PASS	..
VID057.HO	VID057	..	..	2019	BiaginiEJHG2019	Modern	0	0	present	..	Spanish.HO	Catalonia, Catalunya Central	Spain	41.9136	1.88912	1240K pulldown padded to 3.2M snpset	HumanOrigins	..	..	..	554924	M	..	..	..	..	..	..	..	..	..	..	PASS	..
EIV009_2.HO	EIV009_2	..	..	2019	BiaginiEJHG2019	Modern	0	0	present	..	Spanish.HO	Balearic Islands, Eivissa	Spain	38.7055	1.4283	1240K pulldown padded to 3.2M snpset	HumanOrigins	..	..	..	548558	M	..	..	..	..	..	..	..	..	..	..	PASS	..
EIV010_2.HO	EIV010_2	..	..	2019	BiaginiEJHG2019	Modern	0	0	present	..	Spanish.HO	Balearic Islands, Eivissa	Spain	38.7055	1.4283	1240K pulldown padded to 3.2M snpset	HumanOrigins	..	..	..	552562	F	..	n/a (female)	n/a (female)	..	..	..	..	..	..	..	PASS	..
EIV011_2.HO	EIV011_2	..	..	2019	BiaginiEJHG2019	Modern	0	0	present	..	Spanish.HO	Balearic Islands, Eivissa	Spain	38.7055	1.4283	1240K pulldown padded to 3.2M snpset	HumanOrigins	..	..	..	553098	F	..	n/a (female)	n/a (female)	..	..	..	..	..	..	..	PASS	..
EIV001_2.HO	EIV001_2	..	..	2019	BiaginiEJHG2019	Modern	0	0	present	..	Spanish.HO	Balearic Islands, Eivissa	Spain	38.7055	1.4283	1240K pulldown padded to 3.2M snpset	HumanOrigins	..	..	..	554994	M	..	..	..	..	..	..	..	..	..	..	PASS	..
EIV004_2.HO	EIV004_2	..	..	2019	BiaginiEJHG2019	Modern	0	0	present	..	Spanish.HO	Balearic Islands, Eivissa	Spain	38.7055	1.4283	1240K pulldown padded to 3.2M snpset	HumanOrigins	..	..	..	554896	M	..	..	..	..	..	..	..	..	..	..	PASS	..
EIV012_2.HO	EIV012_2	..	..	2019	BiaginiEJHG2019	Modern	0	0	present	..	Spanish.HO	Balearic Islands, Eivissa	Spain	38.7055	1.4283	1240K pulldown padded to 3.2M snpset	HumanOrigins	..	..	..	554232	F	..	n/a (female)	n/a (female)	..	..	..	..	..	..	..	PASS	..
EIV013_2.HO	EIV013_2	..	..	2019	BiaginiEJHG2019	Modern	0	0	present	..	Spanish.HO	Balearic Islands, Eivissa	Spain	38.7055	1.4283	1240K pulldown padded to 3.2M snpset	HumanOrigins	..	..	..	553839	F	..	n/a (female)	n/a (female)	..	..	..	..	..	..	..	PASS	..
EIV014_2.HO	EIV014_2	..	..	2019	BiaginiEJHG2019	Modern	0	0	present	..	Spanish.HO	Balearic Islands, Eivissa	Spain	38.7055	1.4283	1240K pulldown padded to 3.2M snpset	HumanOrigins	..	..	..	554528	M	..	..	..	..	..	..	..	..	..	..	PASS	..
EIV015_2.HO	EIV015_2	..	..	2019	BiaginiEJHG2019	Modern	0	0	present	..	Spanish.HO	Balearic Islands, Eivissa	Spain	38.7055	1.4283	1240K pulldown padded to 3.2M snpset	HumanOrigins	..	..	..	554311	F	..	n/a (female)	n/a (female)	..	..	..	..	..	..	..	PASS	..
HGDP01396.DG	HGDP01396	..	..	2020	BergstromScience2020	Modern	0	0	present	..	Adygei_o.DG	Caucasus, Krasnodar	Russia	44	39	1240K pulldown padded to 3.2M snpset	Shotgun.diploid	..	..	1136238	586873	M	n/a (no relatives detected)	..	..	..	..	..	..	..	..	..	PASS	..
S_Adygei-2.DG	HGDP01401	HGDP01401		2007	MallickNature2016 (shotgun data with SNP array data first published in LiScience2008 and JakobssonNature2008)	Modern	0	0	present	..	Adygei.DG	Caucasus, Krasnodar	Russia	44	39	1240K pulldown padded to 3.2M snpset	Shotgun.diploid	1	35.33	1117652	583404	F	n/a (no relatives detected)	n/a (female)	n/a (female)	..	..	..	..	..	..	S_Adygei-2	PASS	..
S_Adygei-1.DG	HGDP01402	HGDP01402		2007	MallickNature2016 (shotgun data with SNP array data first published in LiScience2008 and JakobssonNature2008)	Modern	0	0	present	..	Adygei.DG	Caucasus, Krasnodar	Russia	44	39	1240K pulldown padded to 3.2M snpset	Shotgun.diploid	1	41.57	1118112	583670	M	n/a (no relatives detected)	..	..	..	..	..	..	..	..	S_Adygei-1	PASS	..
HGDP01382.DG	HGDP01382	..	..	2020	BergstromScience2020	Modern	0	0	present	..	Adygei.DG	Caucasus, Krasnodar	Russia	44	39	1240K pulldown padded to 3.2M snpset	Shotgun.diploid	..	..	1136385	586892	F	n/a (no relatives detected)	n/a (female)	n/a (female)	..	..	..	..	..	..	..	PASS	..
HGDP01383.DG	HGDP01383	..	..	2020	BergstromScience2020	Modern	0	0	present	..	Adygei.DG	Caucasus, Krasnodar	Russia	44	39	1240K pulldown padded to 3.2M snpset	Shotgun.diploid	..	..	1136710	587060	M	n/a (no relatives detected)	..	..	..	..	..	..	..	..	..	PASS	..
HGDP01385.DG	HGDP01385	..	..	2020	BergstromScience2020	Modern	0	0	present	..	Adygei.DG	Caucasus, Krasnodar	Russia	44	39	1240K pulldown padded to 3.2M snpset	Shotgun.diploid	..	..	1137171	587285	M	n/a (no relatives detected)	..	..	..	..	..	..	..	..	..	PASS	..
HGDP01386.DG	HGDP01386	..	..	2020	BergstromScience2020	Modern	0	0	present	..	Adygei.DG	Caucasus, Krasnodar	Russia	44	39	1240K pulldown padded to 3.2M snpset	Shotgun.diploid	..	..	1137867	587514	F	n/a (no relatives detected)	n/a (female)	n/a (female)	..	..	..	..	..	..	..	PASS	..
HGDP01387.DG	HGDP01387	..	..	2020	BergstromScience2020	Modern	0	0	present	..	Adygei.DG	Caucasus, Krasnodar	Russia	44	39	1240K pulldown padded to 3.2M snpset	Shotgun.diploid	..	..	1136750	586907	F	n/a (no relatives detected)	n/a (female)	n/a (female)	..	..	..	..	..	..	..	PASS	..
HGDP01397.DG	HGDP01397	..	..	2020	BergstromScience2020	Modern	0	0	present	..	Adygei.DG	Caucasus, Krasnodar	Russia	44	39	1240K pulldown padded to 3.2M snpset	Shotgun.diploid	..	..	1138804	587947	M	n/a (no relatives detected)	..	..	..	..	..	..	..	..	..	PASS	..
HGDP01398.DG	HGDP01398	..	..	2020	BergstromScience2020	Modern	0	0	present	..	Adygei.DG	Caucasus, Krasnodar	Russia	44	39	1240K pulldown padded to 3.2M snpset	Shotgun.diploid	..	..	1135841	586579	F	n/a (no relatives detected)	n/a (female)	n/a (female)	..	..	..	..	..	..	..	PASS	..
HGDP01399.DG	HGDP01399	..	..	2020	BergstromScience2020	Modern	0	0	present	..	Adygei.DG	Caucasus, Krasnodar	Russia	44	39	1240K pulldown padded to 3.2M snpset	Shotgun.diploid	..	..	1137251	587255	F	n/a (no relatives detected)	n/a (female)	n/a (female)	..	..	..	..	..	..	..	PASS	..
HGDP01400.DG	HGDP01400	..	..	2020	BergstromScience2020	Modern	0	0	present	..	Adygei.DG	Caucasus, Krasnodar	Russia	44	39	1240K pulldown padded to 3.2M snpset	Shotgun.diploid	..	..	1136012	586701	F	n/a (no relatives detected)	n/a (female)	n/a (female)	..	..	..	..	..	..	..	PASS	..
HGDP01401.DG	HGDP01401	HGDP01401	..	2020	BergstromScience2020	Modern	0	0	present	..	Adygei.DG	Caucasus, Krasnodar	Russia	44	39	1240K pulldown padded to 3.2M snpset	Shotgun.diploid	..	..	1141099	588951	F	n/a (no relatives detected)	n/a (female)	n/a (female)	..	..	..	..	..	..	..	PASS	..
HGDP01402.DG	HGDP01402	HGDP01402	..	2020	BergstromScience2020	Modern	0	0	present	..	Adygei.DG	Caucasus, Krasnodar	Russia	44	39	1240K pulldown padded to 3.2M snpset	Shotgun.diploid	..	..	1141446	589092	M	n/a (no relatives detected)	..	..	..	..	..	..	..	..	..	PASS	..
HGDP01403.DG	HGDP01403	..	..	2020	BergstromScience2020	Modern	0	0	present	..	Adygei.DG	Caucasus, Krasnodar	Russia	44	39	1240K pulldown padded to 3.2M snpset	Shotgun.diploid	..	..	1137234	587211	M	n/a (no relatives detected)	..	..	..	..	..	..	..	..	..	PASS	..
HGDP01404.DG	HGDP01404	..	..	2020	BergstromScience2020	Modern	0	0	present	..	Adygei.DG	Caucasus, Krasnodar	Russia	44	39	1240K pulldown padded to 3.2M snpset	Shotgun.diploid	..	..	1132256	584874	M	n/a (no relatives detected)	..	..	..	..	..	..	..	..	..	PASS	..
S_Armenian-1.DG	armenia293	armenia293		2016	MallickNature2016	Modern	0	0	present	..	Armenian.DG	Yerevan	Armenia	39.8153	46.7519	1240K pulldown padded to 3.2M snpset	Shotgun.diploid	1	39.89	1119649	584400	M	n/a (no relatives detected)	..	..	..	..	..	..	..	..	S_Armenian-1	PASS	..
S_Armenian-2.DG	S_Armenian-2	S_Armenian-2		2016	MallickNature2016	Modern	0	0	present	..	Armenian.DG	Kars (ancestors from Kars, born in Akhuzyan)	Armenia	40.6045	43.1008	1240K pulldown padded to 3.2M snpset	Shotgun.diploid	1	45.36	1119554	584324	M	n/a (no relatives detected)	..	..	..	..	..	..	..	..	S_Armenian-2	PASS	..
S_Basque-1.DG	HGDP01364	HGDP01364		2007	MallickNature2016 (shotgun data with SNP array data first published in LiScience2008 and JakobssonNature2008)	Modern	0	0	present	..	Basque.DG	..	France	43	0	1240K pulldown padded to 3.2M snpset	Shotgun.diploid	1	41.85	1119395	584274	M	n/a (no relatives detected)	..	..	..	..	..	..	..	..	S_Basque-1	PASS	..
S_Basque-2.DG	HGDP01365	HGDP01365		2007	MallickNature2016 (shotgun data with SNP array data first published in LiScience2008 and JakobssonNature2008)	Modern	0	0	present	..	Basque.DG	..	France	43	0	1240K pulldown padded to 3.2M snpset	Shotgun.diploid	1	38.49	1119519	584299	F	n/a (no relatives detected)	n/a (female)	n/a (female)	..	..	..	..	..	..	S_Basque-2	PASS	..
HGDP01357.DG	HGDP01357	..	..	2020	BergstromScience2020	Modern	0	0	present	..	Basque.DG	..	France	43	0	1240K pulldown padded to 3.2M snpset	Shotgun.diploid	..	..	1138757	587895	M	n/a (no relatives detected)	..	..	..	..	..	..	..	..	..	PASS	..
HGDP01358.DG	HGDP01358	..	..	2020	BergstromScience2020	Modern	0	0	present	..	Basque.DG	..	France	43	0	1240K pulldown padded to 3.2M snpset	Shotgun.diploid	..	..	1138801	587976	M	n/a (no relatives detected)	..	..	..	..	..	..	..	..	..	PASS	..
HGDP01359.DG	HGDP01359	..	..	2020	BergstromScience2020	Modern	0	0	present	..	Basque.DG	..	France	43	0	1240K pulldown padded to 3.2M snpset	Shotgun.diploid	..	..	1138651	587860	M	n/a (no relatives detected)	..	..	..	..	..	..	..	..	..	PASS	..
HGDP01360.DG	HGDP01360	..	..	2020	BergstromScience2020	Modern	0	0	present	..	Basque.DG	..	France	43	0	1240K pulldown padded to 3.2M snpset	Shotgun.diploid	..	..	1139183	588144	M	n/a (no relatives detected)	..	..	..	..	..	..	..	..	..	PASS	..
HGDP01361.DG	HGDP01361	..	..	2020	BergstromScience2020	Modern	0	0	present	..	Basque.DG	..	France	43	0	1240K pulldown padded to 3.2M snpset	Shotgun.diploid	..	..	1138225	587619	M	n/a (no relatives detected)	..	..	..	..	..	..	..	..	..	PASS	..
HGDP01362.DG	HGDP01362	..	..	2020	BergstromScience2020	Modern	0	0	present	..	Basque.DG	..	France	43	0	1240K pulldown padded to 3.2M snpset	Shotgun.diploid	..	..	1136252	586716	M	n/a (no relatives detected)	..	..	..	..	..	..	..	..	..	PASS	..
HGDP01363.DG	HGDP01363	..	..	2020	BergstromScience2020	Modern	0	0	present	..	Basque.DG	..	France	43	0	1240K pulldown padded to 3.2M snpset	Shotgun.diploid	..	..	1136384	586837	F	n/a (no relatives detected)	n/a (female)	n/a (female)	..	..	..	..	..	..	..	PASS	..
HGDP01364.DG	HGDP01364	HGDP01364	..	2020	BergstromScience2020	Modern	0	0	present	..	Basque.DG	..	France	43	0	1240K pulldown padded to 3.2M snpset	Shotgun.diploid	..	..	1141274	589039	M	n/a (no relatives detected)	..	..	..	..	..	..	..	..	..	PASS	..
HGDP01365.DG	HGDP01365	HGDP01365	..	2020	BergstromScience2020	Modern	0	0	present	..	Basque.DG	..	France	43	0	1240K pulldown padded to 3.2M snpset	Shotgun.diploid	..	..	1141106	588931	F	n/a (no relatives detected)	n/a (female)	n/a (female)	..	..	..	..	..	..	..	PASS	..
HGDP01366.DG	HGDP01366	..	..	2020	BergstromScience2020	Modern	0	0	present	..	Basque.DG	..	France	43	0	1240K pulldown padded to 3.2M snpset	Shotgun.diploid	..	..	1139848	588357	F	n/a (no relatives detected)	n/a (female)	n/a (female)	..	..	..	..	..	..	..	PASS	..
HGDP01367.DG	HGDP01367	..	..	2020	BergstromScience2020	Modern	0	0	present	..	Basque.DG	..	France	43	0	1240K pulldown padded to 3.2M snpset	Shotgun.diploid	..	..	1134273	585754	F	n/a (no relatives detected)	n/a (female)	n/a (female)	..	..	..	..	..	..	..	PASS	..
HGDP01368.DG	HGDP01368	..	..	2020	BergstromScience2020	Modern	0	0	present	..	Basque.DG	..	France	43	0	1240K pulldown padded to 3.2M snpset	Shotgun.diploid	..	..	1139738	588309	U	n/a (no relatives detected)	n/a (sex unknown)	n/a (sex unknown)	..	..	..	..	..	..	..	PASS	..
HGDP01370.DG	HGDP01370	..	..	2020	BergstromScience2020	Modern	0	0	present	..	Basque.DG	..	France	43	0	1240K pulldown padded to 3.2M snpset	Shotgun.diploid	..	..	1139169	588088	M	n/a (no relatives detected)	..	..	..	..	..	..	..	..	..	PASS	..
HGDP01373.DG	HGDP01373	..	..	2020	BergstromScience2020	Modern	0	0	present	..	Basque.DG	..	France	43	0	1240K pulldown padded to 3.2M snpset	Shotgun.diploid	..	..	1132853	585226	F	n/a (no relatives detected)	n/a (female)	n/a (female)	..	..	..	..	..	..	..	PASS	..
HGDP01374.DG	HGDP01374	..	..	2020	BergstromScience2020	Modern	0	0	present	..	Basque.DG	..	France	43	0	1240K pulldown padded to 3.2M snpset	Shotgun.diploid	..	..	1135676	586527	M	n/a (no relatives detected)	..	..	..	..	..	..	..	..	..	PASS	..
HGDP01375.DG	HGDP01375	..	..	2020	BergstromScience2020	Modern	0	0	present	..	Basque.DG	..	France	43	0	1240K pulldown padded to 3.2M snpset	Shotgun.diploid	..	..	1139134	588097	M	n/a (no relatives detected)	..	..	..	..	..	..	..	..	..	PASS	..
HGDP01376.DG	HGDP01376	..	..	2020	BergstromScience2020	Modern	0	0	present	..	Basque.DG	..	France	43	0	1240K pulldown padded to 3.2M snpset	Shotgun.diploid	..	..	1139609	588250	M	n/a (no relatives detected)	..	..	..	..	..	..	..	..	..	PASS	..
HGDP01377.DG	HGDP01377	..	..	2020	BergstromScience2020	Modern	0	0	present	..	Basque.DG	..	France	43	0	1240K pulldown padded to 3.2M snpset	Shotgun.diploid	..	..	1138975	587989	M	n/a (no relatives detected)	..	..	..	..	..	..	..	..	..	PASS	..
HGDP01378.DG	HGDP01378	..	..	2020	BergstromScience2020	Modern	0	0	present	..	Basque.DG	..	France	43	0	1240K pulldown padded to 3.2M snpset	Shotgun.diploid	..	..	1137468	587336	M	n/a (no relatives detected)	..	..	..	..	..	..	..	..	..	PASS	..
HGDP01379.DG	HGDP01379	..	..	2020	BergstromScience2020	Modern	0	0	present	..	Basque.DG	..	France	43	0	1240K pulldown padded to 3.2M snpset	Shotgun.diploid	..	..	1138466	587784	M	n/a (no relatives detected)	..	..	..	..	..	..	..	..	..	PASS	..
HGDP01380.DG	HGDP01380	..	..	2020	BergstromScience2020	Modern	0	0	present	..	Basque.DG	..	France	43	0	1240K pulldown padded to 3.2M snpset	Shotgun.diploid	..	..	1134586	586097	F	n/a (no relatives detected)	n/a (female)	n/a (female)	..	..	..	..	..	..	..	PASS	..
HGDP00609.DG	HGDP00609	..	..	2020	BergstromScience2020	Modern	0	0	present	..	BedouinA.DG	..	Israel	31	35	1240K pulldown padded to 3.2M snpset	Shotgun.diploid	..	..	1133516	585316	M	n/a (no relatives detected)	..	..	..	..	..	..	..	..	..	PASS	..
HGDP00611.DG	HGDP00611	..	..	2020	BergstromScience2020	Modern	0	0	present	..	BedouinA.DG	..	Israel	31	35	1240K pulldown padded to 3.2M snpset	Shotgun.diploid	..	..	1140269	588623	M	n/a (no relatives detected)	..	..	..	..	..	..	..	..	..	PASS	..
HGDP00613.DG	HGDP00613	..	..	2020	BergstromScience2020	Modern	0	0	present	..	BedouinA.DG	..	Israel	31	35	1240K pulldown padded to 3.2M snpset	Shotgun.diploid	..	..	1138361	587701	F	n/a (no relatives detected)	n/a (female)	n/a (female)	..	..	..	..	..	..	..	PASS	..
HGDP00614.DG	HGDP00614	..	..	2020	BergstromScience2020	Modern	0	0	present	..	BedouinA.DG	..	Israel	31	35	1240K pulldown padded to 3.2M snpset	Shotgun.diploid	..	..	1137669	587407	F	n/a (no relatives detected)	n/a (female)	n/a (female)	..	..	..	..	..	..	..	PASS	..
HGDP00615.DG	HGDP00615	..	..	2020	BergstromScience2020	Modern	0	0	present	..	BedouinA.DG	..	Israel	31	35	1240K pulldown padded to 3.2M snpset	Shotgun.diploid	..	..	1133165	585068	F	n/a (no relatives detected)	n/a (female)	n/a (female)	..	..	..	..	..	..	..	PASS	..
HGDP00619.DG	HGDP00619	..	..	2020	BergstromScience2020	Modern	0	0	present	..	BedouinA.DG	..	Israel	31	35	1240K pulldown padded to 3.2M snpset	Shotgun.diploid	..	..	1139101	588029	M	n/a (no relatives detected)	..	..	..	..	..	..	..	..	..	PASS	..
HGDP00620.DG	HGDP00620	..	..	2020	BergstromScience2020	Modern	0	0	present	..	BedouinA.DG	..	Israel	31	35	1240K pulldown padded to 3.2M snpset	Shotgun.diploid	..	..	1138673	587917	M	n/a (no relatives detected)	..	..	..	..	..	..	..	..	..	PASS	..
HGDP00622.DG	HGDP00622	..	..	2020	BergstromScience2020	Modern	0	0	present	..	BedouinA.DG	..	Israel	31	35	1240K pulldown padded to 3.2M snpset	Shotgun.diploid	..	..	1137993	587552	M	n/a (no relatives detected)	..	..	..	..	..	..	..	..	..	PASS	..
HGDP00625.DG	HGDP00625	..	..	2020	BergstromScience2020	Modern	0	0	present	..	BedouinA.DG	..	Israel	31	35	1240K pulldown padded to 3.2M snpset	Shotgun.diploid	..	..	1139878	588370	M	n/a (no relatives detected)	..	..	..	..	..	..	..	..	..	PASS	..
HGDP00626.DG	HGDP00626	..	..	2020	BergstromScience2020	Modern	0	0	present	..	BedouinA.DG	..	Israel	31	35	1240K pulldown padded to 3.2M snpset	Shotgun.diploid	..	..	1138592	587877	M	n/a (no relatives detected)	..	..	..	..	..	..	..	..	..	PASS	..
HGDP00628.DG	HGDP00628	..	..	2020	BergstromScience2020	Modern	0	0	present	..	BedouinA.DG	..	Israel	31	35	1240K pulldown padded to 3.2M snpset	Shotgun.diploid	..	..	1139563	588239	M	n/a (no relatives detected)	..	..	..	..	..	..	..	..	..	PASS	..
HGDP00629.DG	HGDP00629	..	..	2020	BergstromScience2020	Modern	0	0	present	..	BedouinA.DG	..	Israel	31	35	1240K pulldown padded to 3.2M snpset	Shotgun.diploid	..	..	1139412	588230	M	n/a (no relatives detected)	..	..	..	..	..	..	..	..	..	PASS	..
HGDP00632.DG	HGDP00632	..	..	2020	BergstromScience2020	Modern	0	0	present	..	BedouinA.DG	..	Israel	31	35	1240K pulldown padded to 3.2M snpset	Shotgun.diploid	..	..	1135854	586540	F	n/a (no relatives detected)	n/a (female)	n/a (female)	..	..	..	..	..	..	..	PASS	..
HGDP00634.DG	HGDP00634	..	..	2020	BergstromScience2020	Modern	0	0	present	..	BedouinA.DG	..	Israel	32	35	1240K pulldown padded to 3.2M snpset	Shotgun.diploid	..	..	1137044	587091	F	n/a (no relatives detected)	n/a (female)	n/a (female)	..	..	..	..	..	..	..	PASS	..
HGDP00635.DG	HGDP00635	..	..	2020	BergstromScience2020	Modern	0	0	present	..	BedouinA.DG	..	Israel	31	35	1240K pulldown padded to 3.2M snpset	Shotgun.diploid	..	..	1136973	587044	F	n/a (no relatives detected)	n/a (female)	n/a (female)	..	..	..	..	..	..	..	PASS	..
HGDP00637.DG	HGDP00637	..	..	2020	BergstromScience2020	Modern	0	0	present	..	BedouinA.DG	..	Israel	31	35	1240K pulldown padded to 3.2M snpset	Shotgun.diploid	..	..	1137361	587313	F	n/a (no relatives detected)	n/a (female)	n/a (female)	..	..	..	..	..	..	..	PASS	..
HGDP00638.DG	HGDP00638	..	..	2020	BergstromScience2020	Modern	0	0	present	..	BedouinA.DG	..	Israel	31	35	1240K pulldown padded to 3.2M snpset	Shotgun.diploid	..	..	1136951	587119	F	n/a (no relatives detected)	n/a (female)	n/a (female)	..	..	..	..	..	..	..	PASS	..
HGDP00639.DG	HGDP00639	..	..	2020	BergstromScience2020	Modern	0	0	present	..	BedouinA.DG	..	Israel	31	35	1240K pulldown padded to 3.2M snpset	Shotgun.diploid	..	..	1136676	586971	M	n/a (no relatives detected)	..	..	..	..	..	..	..	..	..	PASS	..
HGDP00640.DG	HGDP00640	..	..	2020	BergstromScience2020	Modern	0	0	present	..	BedouinA.DG	..	Israel	31	35	1240K pulldown padded to 3.2M snpset	Shotgun.diploid	..	..	1137745	587472	M	n/a (no relatives detected)	..	..	..	..	..	..	..	..	..	PASS	..
HGDP00642.DG	HGDP00642	..	..	2020	BergstromScience2020	Modern	0	0	present	..	BedouinA.DG	..	Israel	31	35	1240K pulldown padded to 3.2M snpset	Shotgun.diploid	..	..	1132270	584821	M	n/a (no relatives detected)	..	..	..	..	..	..	..	..	..	PASS	..
HGDP00644.DG	HGDP00644	..	..	2020	BergstromScience2020	Modern	0	0	present	..	BedouinA.DG	..	Israel	31	35	1240K pulldown padded to 3.2M snpset	Shotgun.diploid	..	..	1136925	587057	M	n/a (no relatives detected)	..	..	..	..	..	..	..	..	..	PASS	..
HGDP00645.DG	HGDP00645	..	..	2020	BergstromScience2020	Modern	0	0	present	..	BedouinA.DG	..	Israel	31	35	1240K pulldown padded to 3.2M snpset	Shotgun.diploid	..	..	1136529	586827	M	n/a (no relatives detected)	..	..	..	..	..	..	..	..	..	PASS	..
HGDP00646.DG	HGDP00646	..	..	2020	BergstromScience2020	Modern	0	0	present	..	BedouinA.DG	..	Israel	31	35	1240K pulldown padded to 3.2M snpset	Shotgun.diploid	..	..	1137912	587532	F	n/a (no relatives detected)	n/a (female)	n/a (female)	..	..	..	..	..	..	..	PASS	..
HGDP00647.DG	HGDP00647	..	..	2020	BergstromScience2020	Modern	0	0	present	..	BedouinA.DG	..	Israel	31	35	1240K pulldown padded to 3.2M snpset	Shotgun.diploid	..	..	1138023	587577	F	n/a (no relatives detected)	n/a (female)	n/a (female)	..	..	..	..	..	..	..	PASS	..
HGDP00654.DG	HGDP00654	..	..	2020	BergstromScience2020	Modern	0	0	present	..	BedouinA.DG	..	Israel	31	35	1240K pulldown padded to 3.2M snpset	Shotgun.diploid	..	..	1139598	588322	M	n/a (no relatives detected)	..	..	..	..	..	..	..	..	..	PASS	..
S_BedouinB-1.DG	HGDP00616	HGDP00616		2007	MallickNature2016 (shotgun data with SNP array data first published in LiScience2008 and JakobssonNature2008)	Modern	0	0	present	..	BedouinB.DG	..	Israel	31	35	1240K pulldown padded to 3.2M snpset	Shotgun.diploid	1	43.86	1118872	584050	M	n/a (no relatives detected)	..	..	..	..	..	..	..	..	S_BedouinB-1	PASS	..
S_BedouinB-2.DG	HGDP00650	HGDP00650		2007	MallickNature2016 (shotgun data with SNP array data first published in LiScience2008 and JakobssonNature2008)	Modern	0	0	present	..	BedouinB.DG	..	Israel	31	35	1240K pulldown padded to 3.2M snpset	Shotgun.diploid	1	42.04	1118886	584074	F	n/a (no relatives detected)	n/a (female)	n/a (female)	..	..	..	..	..	..	S_BedouinB-2	PASS	..
HGDP00607.DG	HGDP00607	..	..	2020	BergstromScience2020	Modern	0	0	present	..	BedouinB.DG	..	Israel	31	35	1240K pulldown padded to 3.2M snpset	Shotgun.diploid	..	..	1137710	587508	F	n/a (no relatives detected)	n/a (female)	n/a (female)	..	..	..	..	..	..	..	PASS	..
HGDP00608.DG	HGDP00608	..	..	2020	BergstromScience2020	Modern	0	0	present	..	BedouinB.DG	..	Israel	31	35	1240K pulldown padded to 3.2M snpset	Shotgun.diploid	..	..	1133867	585818	M	n/a (no relatives detected)	..	..	..	..	..	..	..	..	..	PASS	..
HGDP00610.DG	HGDP00610	..	..	2020	BergstromScience2020	Modern	0	0	present	..	BedouinB.DG	..	Israel	31	35	1240K pulldown padded to 3.2M snpset	Shotgun.diploid	..	..	1137664	587622	M	n/a (no relatives detected)	..	..	..	..	..	..	..	..	..	PASS	..
HGDP00612.DG	HGDP00612	..	..	2020	BergstromScience2020	Modern	0	0	present	..	BedouinB.DG	..	Israel	31	35	1240K pulldown padded to 3.2M snpset	Shotgun.diploid	..	..	1138392	587716	F	n/a (no relatives detected)	n/a (female)	n/a (female)	..	..	..	..	..	..	..	PASS	..
HGDP00616.DG	HGDP00616	HGDP00616	..	2020	BergstromScience2020	Modern	0	0	present	..	BedouinB.DG	..	Israel	31	35	1240K pulldown padded to 3.2M snpset	Shotgun.diploid	..	..	1141312	589055	M	n/a (no relatives detected)	..	..	..	..	..	..	..	..	..	PASS	..
HGDP00618.DG	HGDP00618	..	..	2020	BergstromScience2020	Modern	0	0	present	..	BedouinB.DG	..	Israel	31	35	1240K pulldown padded to 3.2M snpset	Shotgun.diploid	..	..	1138322	587703	M	n/a (no relatives detected)	..	..	..	..	..	..	..	..	..	PASS	..
HGDP00623.DG	HGDP00623	..	..	2020	BergstromScience2020	Modern	0	0	present	..	BedouinB.DG	..	Israel	31	35	1240K pulldown padded to 3.2M snpset	Shotgun.diploid	..	..	1139042	588060	M	n/a (no relatives detected)	..	..	..	..	..	..	..	..	..	PASS	..
HGDP00624.DG	HGDP00624	..	..	2020	BergstromScience2020	Modern	0	0	present	..	BedouinB.DG	..	Israel	31	35	1240K pulldown padded to 3.2M snpset	Shotgun.diploid	..	..	1139116	588066	M	n/a (no relatives detected)	..	..	..	..	..	..	..	..	..	PASS	..
HGDP00630.DG	HGDP00630	..	..	2020	BergstromScience2020	Modern	0	0	present	..	BedouinB.DG	..	Israel	31	35	1240K pulldown padded to 3.2M snpset	Shotgun.diploid	..	..	1139767	588402	M	n/a (no relatives detected)	..	..	..	..	..	..	..	..	..	PASS	..
HGDP00631.DG	HGDP00631	..	..	2020	BergstromScience2020	Modern	0	0	present	..	BedouinB.DG	..	Israel	31	35	1240K pulldown padded to 3.2M snpset	Shotgun.diploid	..	..	1139197	588099	M	n/a (no relatives detected)	..	..	..	..	..	..	..	..	..	PASS	..
HGDP00636.DG	HGDP00636	..	..	2020	BergstromScience2020	Modern	0	0	present	..	BedouinB.DG	..	Israel	31	35	1240K pulldown padded to 3.2M snpset	Shotgun.diploid	..	..	1139532	588280	F	n/a (no relatives detected)	n/a (female)	n/a (female)	..	..	..	..	..	..	..	PASS	..
HGDP00641.DG	HGDP00641	..	..	2020	BergstromScience2020	Modern	0	0	present	..	BedouinB.DG	..	Israel	31	35	1240K pulldown padded to 3.2M snpset	Shotgun.diploid	..	..	1133812	585709	M	n/a (no relatives detected)	..	..	..	..	..	..	..	..	..	PASS	..
HGDP00643.DG	HGDP00643	..	..	2020	BergstromScience2020	Modern	0	0	present	..	BedouinB.DG	..	Israel	31	35	1240K pulldown padded to 3.2M snpset	Shotgun.diploid	..	..	1138756	587928	F	n/a (no relatives detected)	n/a (female)	n/a (female)	..	..	..	..	..	..	..	PASS	..
HGDP00648.DG	HGDP00648	..	..	2020	BergstromScience2020	Modern	0	0	present	..	BedouinB.DG	..	Israel	31	35	1240K pulldown padded to 3.2M snpset	Shotgun.diploid	..	..	1133122	585307	M	n/a (no relatives detected)	..	..	..	..	..	..	..	..	..	PASS	..
HGDP00649.DG	HGDP00649	..	..	2020	BergstromScience2020	Modern	0	0	present	..	BedouinB.DG	..	Israel	31	35	1240K pulldown padded to 3.2M snpset	Shotgun.diploid	..	..	1138101	587721	F	n/a (no relatives detected)	n/a (female)	n/a (female)	..	..	..	..	..	..	..	PASS	..
HGDP00650.DG	HGDP00650	HGDP00650	..	2020	BergstromScience2020	Modern	0	0	present	..	BedouinB.DG	..	Israel	31	35	1240K pulldown padded to 3.2M snpset	Shotgun.diploid	..	..	1141287	589026	F	n/a (no relatives detected)	n/a (female)	n/a (female)	..	..	..	..	..	..	..	PASS	..
HGDP00651.DG	HGDP00651	..	..	2020	BergstromScience2020	Modern	0	0	present	..	BedouinB.DG	..	Israel	31	35	1240K pulldown padded to 3.2M snpset	Shotgun.diploid	..	..	1137150	587176	F	n/a (no relatives detected)	n/a (female)	n/a (female)	..	..	..	..	..	..	..	PASS	..
HGDP00653.DG	HGDP00653	..	..	2020	BergstromScience2020	Modern	0	0	present	..	BedouinB.DG	..	Israel	31	35	1240K pulldown padded to 3.2M snpset	Shotgun.diploid	..	..	1137230	587212	F	n/a (no relatives detected)	n/a (female)	n/a (female)	..	..	..	..	..	..	..	PASS	..
HGDP00701.DG	HGDP00701	..	..	2020	BergstromScience2020	Modern	0	0	present	..	BedouinB.DG	..	Israel	31	35	1240K pulldown padded to 3.2M snpset	Shotgun.diploid	..	..	1135840	586634	F	n/a (no relatives detected)	n/a (female)	n/a (female)	..	..	..	..	..	..	..	PASS	..
S_Bulgarian-1.DG	BulgarianB4	BulgarianB4		2016	MallickNature2016	Modern	0	0	present	..	Bulgarian.DG	Plovdiv	Bulgaria	42.1634	24.7412	1240K pulldown padded to 3.2M snpset	Shotgun.diploid	1	42.71	1114859	581938	M	n/a (no relatives detected)	..	..	..	..	..	..	..	..	S_Bulgarian-1	PASS	..
S_Bulgarian-2.DG	BulgarianC1	BulgarianC1		2016	MallickNature2016	Modern	0	0	present	..	Bulgarian.DG	Plovdiv	Bulgaria	42.1634	24.7412	1240K pulldown padded to 3.2M snpset	Shotgun.diploid	1	37.52	1114912	582040	M	n/a (no relatives detected)	..	..	..	..	..	..	..	..	S_Bulgarian-2	PASS	..
gun002_noUDG.SG	gun002_Rodriguez	gun002	tooth	2017	RodriguezVarelaCurrentBiology2017	Direct (WARNING MISSING LAB CODE): IntCal20	851	38	1031-1159 calCE (951¬±26 BP)	..	CanaryIslands_Guanche.SG	Tenerife	Canary Islands	28.2686	-16.6056	Repulldown on 3.2M snpset	Shotgun	..	0.213324	150476	77800	M	n/a (no relatives detected)	..	E1b1b1b1a1 E-M183	294.7	H1cf	..	..	..	ds.minus	..	PASS	..
gun005_noUDG.SG	gun005	gun005	tooth	2017	RodriguezVarelaCurrentBiology2017	Direct (WARNING MISSING LAB CODE): IntCal20	992	39	892-1022 calCE (1082¬±26 BP)	..	CanaryIslands_Guanche.SG	Gran Canaria	Canary Islands	27.9667	-15.6	Repulldown on 3.2M snpset	Shotgun	..	0.479117	294038	151868	F	n/a (no relatives detected)	n/a (female)	n/a (female)	341.1	H2a	..	..	..	ds.minus	..	PASS	..
gun008_noUDG.SG	gun008	gun008	tooth	2017	RodriguezVarelaCurrentBiology2017	Direct (WARNING MISSING LAB CODE): IntCal20	1014	37	884-994 calCE (1116¬±26 BP)	..	CanaryIslands_Guanche.SG	Gran Canaria	Canary Islands	27.9667	-15.6	Repulldown on 3.2M snpset	Shotgun	..	0.306521	211526	108992	F	n/a (no relatives detected)	n/a (female)	n/a (female)	690.9	L3b1a	..	..	..	ds.minus	..	PASS	..
gun012_noUDG.SG	gun012	gun012	tooth	2017	RodriguezVarelaCurrentBiology2017	Direct (WARNING MISSING LAB CODE): IntCal20	1324	18	593-660 calCE (1421¬±28 BP)	..	CanaryIslands_Guanche.SG	Tenerife	Canary Islands	28.2686	-16.6056	Repulldown on 3.2M snpset	Shotgun	..	0.548253	320699	164022	M	n/a (no relatives detected)	..	E1b1b1b1a1 E-M183	214.3	U6b1a	..	..	..	ds.minus	..	PASS	..
S_Chechen-1.DG	ch113	ch113		2016	MallickNature2016	Modern	0	0	present	..	Chechen.DG	Grozny_in_Chechen_Republic	Russia	43.3333	45.65	1240K pulldown padded to 3.2M snpset	Shotgun.diploid	1	43.16	1118864	583993	M	n/a (no relatives detected)	..	..	..	..	..	..	..	..	S_Chechen-1	PASS	..
I17313	I17313	2904 (P7A-16100, 6)	petrous	2021	PattersonNature2021	Direct: IntCal20	199	69	1653-1950 calCE (205¬±15 BP, PSUAMS-10054)	..	Czech_Modern	Central Bohemia, Prague 5, Prague-Jinonice (Holman ºs Garden Centre)	Czech Republic	50.0544	14.3634	Repulldown on 3.2M snpset	1240K	2	1.803	561696	304676	F	n/a (no relatives detected)	n/a (female)	n/a (female)	161.253	H1ae	[0.986,0.999]	0.19	0.0176315	ss.half,ss.half	S17313.Y1.E2.L1,S20505.Y1.E1.L1	PASS	..
S_Czech-2.DG	NA15728	NA15728		2016	MallickNature2016	Modern	0	0	present	..	Czech.DG	Pre-1989	Czech Republic	50.1	14.4	1240K pulldown padded to 3.2M snpset	Shotgun.diploid	1	49.74	1119313	584295	M	n/a (no relatives detected)	..	..	..	..	..	..	..	..	S_Czech-2	PASS	..
S_Druze-1.DG	HGDP00569	HGDP00569		2007	MallickNature2016 (shotgun data with SNP array data first published in LiScience2008 and JakobssonNature2008)	Modern	0	0	present	..	Druze.DG	..	Israel	32	35	1240K pulldown padded to 3.2M snpset	Shotgun.diploid	1	50.2	1118751	584046	F	n/a (no relatives detected)	n/a (female)	n/a (female)	..	..	..	..	..	..	S_Druze-1	PASS	..
S_Druze-2.DG	HGDP00597	HGDP00597		2007	MallickNature2016 (shotgun data with SNP array data first published in LiScience2008 and JakobssonNature2008)	Modern	0	0	present	..	Druze.DG	..	Israel	32	35	1240K pulldown padded to 3.2M snpset	Shotgun.diploid	1	44.56	1114457	581811	M	n/a (no relatives detected)	..	..	..	..	..	..	..	..	S_Druze-2	PASS	..
HGDP00557.DG	HGDP00557	..	..	2020	BergstromScience2020	Modern	0	0	present	..	Druze.DG	..	Israel	32	35	1240K pulldown padded to 3.2M snpset	Shotgun.diploid	..	..	1140252	588574	F	n/a (no relatives detected)	n/a (female)	n/a (female)	..	..	..	..	..	..	..	PASS	..
HGDP00558.DG	HGDP00558	..	..	2020	BergstromScience2020	Modern	0	0	present	..	Druze.DG	..	Israel	32	35	1240K pulldown padded to 3.2M snpset	Shotgun.diploid	..	..	1139199	588107	F	n/a (no relatives detected)	n/a (female)	n/a (female)	..	..	..	..	..	..	..	PASS	..
HGDP00559.DG	HGDP00559	..	..	2020	BergstromScience2020	Modern	0	0	present	..	Druze.DG	..	Israel	32	35	1240K pulldown padded to 3.2M snpset	Shotgun.diploid	..	..	1138413	587799	F	n/a (no relatives detected)	n/a (female)	n/a (female)	..	..	..	..	..	..	..	PASS	..
HGDP00560.DG	HGDP00560	..	..	2020	BergstromScience2020	Modern	0	0	present	..	Druze.DG	..	Israel	32	35	1240K pulldown padded to 3.2M snpset	Shotgun.diploid	..	..	1140267	588576	F	n/a (no relatives detected)	n/a (female)	n/a (female)	..	..	..	..	..	..	..	PASS	..
HGDP00561.DG	HGDP00561	..	..	2020	BergstromScience2020	Modern	0	0	present	..	Druze.DG	..	Israel	32	35	1240K pulldown padded to 3.2M snpset	Shotgun.diploid	..	..	1135599	586399	F	n/a (no relatives detected)	n/a (female)	n/a (female)	..	..	..	..	..	..	..	PASS	..
HGDP00562.DG	HGDP00562	..	..	2020	BergstromScience2020	Modern	0	0	present	..	Druze.DG	..	Israel	32	35	1240K pulldown padded to 3.2M snpset	Shotgun.diploid	..	..	1135055	586226	M	n/a (no relatives detected)	..	..	..	..	..	..	..	..	..	PASS	..
HGDP00563.DG	HGDP00563	..	..	2020	BergstromScience2020	Modern	0	0	present	..	Druze.DG	..	Israel	32	35	1240K pulldown padded to 3.2M snpset	Shotgun.diploid	..	..	1140376	588653	F	n/a (no relatives detected)	n/a (female)	n/a (female)	..	..	..	..	..	..	..	PASS	..
HGDP00564.DG	HGDP00564	..	..	2020	BergstromScience2020	Modern	0	0	present	..	Druze.DG	..	Israel	32	35	1240K pulldown padded to 3.2M snpset	Shotgun.diploid	..	..	1138758	587867	F	n/a (no relatives detected)	n/a (female)	n/a (female)	..	..	..	..	..	..	..	PASS	..
HGDP00565.DG	HGDP00565	..	..	2020	BergstromScience2020	Modern	0	0	present	..	Druze.DG	..	Israel	32	35	1240K pulldown padded to 3.2M snpset	Shotgun.diploid	..	..	1137292	587143	F	n/a (no relatives detected)	n/a (female)	n/a (female)	..	..	..	..	..	..	..	PASS	..
HGDP00566.DG	HGDP00566	..	..	2020	BergstromScience2020	Modern	0	0	present	..	Druze.DG	..	Israel	32	35	1240K pulldown padded to 3.2M snpset	Shotgun.diploid	..	..	1139872	588408	F	n/a (no relatives detected)	n/a (female)	n/a (female)	..	..	..	..	..	..	..	PASS	..
HGDP00567.DG	HGDP00567	..	..	2020	BergstromScience2020	Modern	0	0	present	..	Druze.DG	..	Israel	32	35	1240K pulldown padded to 3.2M snpset	Shotgun.diploid	..	..	1139032	588056	F	n/a (no relatives detected)	n/a (female)	n/a (female)	..	..	..	..	..	..	..	PASS	..
HGDP00568.DG	HGDP00568	..	..	2020	BergstromScience2020	Modern	0	0	present	..	Druze.DG	..	Israel	32	35	1240K pulldown padded to 3.2M snpset	Shotgun.diploid	..	..	1136510	586871	U	n/a (no relatives detected)	n/a (sex unknown)	n/a (sex unknown)	..	..	..	..	..	..	..	PASS	..
HGDP00569.DG	HGDP00569	HGDP00569	..	2020	BergstromScience2020	Modern	0	0	present	..	Druze.DG	..	Israel	32	35	1240K pulldown padded to 3.2M snpset	Shotgun.diploid	..	..	1141459	589092	F	n/a (no relatives detected)	n/a (female)	n/a (female)	..	..	..	..	..	..	..	PASS	..
HGDP00571.DG	HGDP00571	..	..	2020	BergstromScience2020	Modern	0	0	present	..	Druze.DG	..	Israel	32	35	1240K pulldown padded to 3.2M snpset	Shotgun.diploid	..	..	1137863	587534	F	n/a (no relatives detected)	n/a (female)	n/a (female)	..	..	..	..	..	..	..	PASS	..
HGDP00572.DG	HGDP00572	..	..	2020	BergstromScience2020	Modern	0	0	present	..	Druze.DG	..	Israel	32	35	1240K pulldown padded to 3.2M snpset	Shotgun.diploid	..	..	1138707	587841	F	n/a (no relatives detected)	n/a (female)	n/a (female)	..	..	..	..	..	..	..	PASS	..
HGDP00573.DG	HGDP00573	..	..	2020	BergstromScience2020	Modern	0	0	present	..	Druze.DG	..	Israel	32	35	1240K pulldown padded to 3.2M snpset	Shotgun.diploid	..	..	1139654	588308	F	n/a (no relatives detected)	n/a (female)	n/a (female)	..	..	..	..	..	..	..	PASS	..
HGDP00574.DG	HGDP00574	..	..	2020	BergstromScience2020	Modern	0	0	present	..	Druze.DG	..	Israel	32	35	1240K pulldown padded to 3.2M snpset	Shotgun.diploid	..	..	1139669	588344	F	n/a (no relatives detected)	n/a (female)	n/a (female)	..	..	..	..	..	..	..	PASS	..
HGDP00575.DG	HGDP00575	..	..	2020	BergstromScience2020	Modern	0	0	present	..	Druze.DG	..	Israel	32	35	1240K pulldown padded to 3.2M snpset	Shotgun.diploid	..	..	1139144	588151	F	n/a (no relatives detected)	n/a (female)	n/a (female)	..	..	..	..	..	..	..	PASS	..
HGDP00577.DG	HGDP00577	..	..	2020	BergstromScience2020	Modern	0	0	present	..	Druze.DG	..	Israel	32	35	1240K pulldown padded to 3.2M snpset	Shotgun.diploid	..	..	1139808	588403	F	n/a (no relatives detected)	n/a (female)	n/a (female)	..	..	..	..	..	..	..	PASS	..
HGDP00578.DG	HGDP00578	..	..	2020	BergstromScience2020	Modern	0	0	present	..	Druze.DG	..	Israel	32	35	1240K pulldown padded to 3.2M snpset	Shotgun.diploid	..	..	1138452	587734	F	n/a (no relatives detected)	n/a (female)	n/a (female)	..	..	..	..	..	..	..	PASS	..
HGDP00579.DG	HGDP00579	..	..	2020	BergstromScience2020	Modern	0	0	present	..	Druze.DG	..	Israel	32	35	1240K pulldown padded to 3.2M snpset	Shotgun.diploid	..	..	1129419	583597	F	n/a (no relatives detected)	n/a (female)	n/a (female)	..	..	..	..	..	..	..	PASS	..
HGDP00580.DG	HGDP00580	..	..	2020	BergstromScience2020	Modern	0	0	present	..	Druze.DG	..	Israel	32	35	1240K pulldown padded to 3.2M snpset	Shotgun.diploid	..	..	1137930	587724	M	n/a (no relatives detected)	..	..	..	..	..	..	..	..	..	PASS	..
HGDP00582.DG	HGDP00582	..	..	2020	BergstromScience2020	Modern	0	0	present	..	Druze.DG	..	Israel	32	35	1240K pulldown padded to 3.2M snpset	Shotgun.diploid	..	..	1139002	587983	F	n/a (no relatives detected)	n/a (female)	n/a (female)	..	..	..	..	..	..	..	PASS	..
HGDP00583.DG	HGDP00583	..	..	2020	BergstromScience2020	Modern	0	0	present	..	Druze.DG	..	Israel	32	35	1240K pulldown padded to 3.2M snpset	Shotgun.diploid	..	..	1139060	588034	F	n/a (no relatives detected)	n/a (female)	n/a (female)	..	..	..	..	..	..	..	PASS	..
HGDP00584.DG	HGDP00584	..	..	2020	BergstromScience2020	Modern	0	0	present	..	Druze.DG	..	Israel	32	35	1240K pulldown padded to 3.2M snpset	Shotgun.diploid	..	..	1139468	588258	F	n/a (no relatives detected)	n/a (female)	n/a (female)	..	..	..	..	..	..	..	PASS	..
HGDP00586.DG	HGDP00586	..	..	2020	BergstromScience2020	Modern	0	0	present	..	Druze.DG	..	Israel	32	35	1240K pulldown padded to 3.2M snpset	Shotgun.diploid	..	..	1139915	588485	F	n/a (no relatives detected)	n/a (female)	n/a (female)	..	..	..	..	..	..	..	PASS	..
HGDP00587.DG	HGDP00587	..	..	2020	BergstromScience2020	Modern	0	0	present	..	Druze.DG	..	Israel	32	35	1240K pulldown padded to 3.2M snpset	Shotgun.diploid	..	..	1139365	588182	F	n/a (no relatives detected)	n/a (female)	n/a (female)	..	..	..	..	..	..	..	PASS	..
HGDP00588.DG	HGDP00588	..	..	2020	BergstromScience2020	Modern	0	0	present	..	Druze.DG	..	Israel	32	35	1240K pulldown padded to 3.2M snpset	Shotgun.diploid	..	..	1138764	587947	M	n/a (no relatives detected)	..	..	..	..	..	..	..	..	..	PASS	..
HGDP00591.DG	HGDP00591	..	..	2020	BergstromScience2020	Modern	0	0	present	..	Druze.DG	..	Israel	32	35	1240K pulldown padded to 3.2M snpset	Shotgun.diploid	..	..	1140074	588510	F	n/a (no relatives detected)	n/a (female)	n/a (female)	..	..	..	..	..	..	..	PASS	..
HGDP00594.DG	HGDP00594	..	..	2020	BergstromScience2020	Modern	0	0	present	..	Druze.DG	..	Israel	32	35	1240K pulldown padded to 3.2M snpset	Shotgun.diploid	..	..	1137826	587501	M	n/a (no relatives detected)	..	..	..	..	..	..	..	..	..	PASS	..
HGDP00595.DG	HGDP00595	..	..	2020	BergstromScience2020	Modern	0	0	present	..	Druze.DG	..	Israel	32	35	1240K pulldown padded to 3.2M snpset	Shotgun.diploid	..	..	1138559	587860	M	n/a (no relatives detected)	..	..	..	..	..	..	..	..	..	PASS	..
HGDP00597.DG	HGDP00597	HGDP00597	..	2020	BergstromScience2020	Modern	0	0	present	..	Druze.DG	..	Israel	32	35	1240K pulldown padded to 3.2M snpset	Shotgun.diploid	..	..	1141416	589111	M	n/a (no relatives detected)	..	..	..	..	..	..	..	..	..	PASS	..
HGDP00598.DG	HGDP00598	..	..	2020	BergstromScience2020	Modern	0	0	present	..	Druze.DG	..	Israel	32	35	1240K pulldown padded to 3.2M snpset	Shotgun.diploid	..	..	1140082	588546	M	n/a (no relatives detected)	..	..	..	..	..	..	..	..	..	PASS	..
HGDP00599.DG	HGDP00599	..	..	2020	BergstromScience2020	Modern	0	0	present	..	Druze.DG	..	Israel	32	35	1240K pulldown padded to 3.2M snpset	Shotgun.diploid	..	..	1139434	588267	M	n/a (no relatives detected)	..	..	..	..	..	..	..	..	..	PASS	..
HGDP00600.DG	HGDP00600	..	..	2020	BergstromScience2020	Modern	0	0	present	..	Druze.DG	..	Israel	32	35	1240K pulldown padded to 3.2M snpset	Shotgun.diploid	..	..	1138889	587961	M	n/a (no relatives detected)	..	..	..	..	..	..	..	..	..	PASS	..
HGDP00601.DG	HGDP00601	..	..	2020	BergstromScience2020	Modern	0	0	present	..	Druze.DG	..	Israel	32	35	1240K pulldown padded to 3.2M snpset	Shotgun.diploid	..	..	1139415	588238	F	n/a (no relatives detected)	n/a (female)	n/a (female)	..	..	..	..	..	..	..	PASS	..
HGDP00602.DG	HGDP00602	..	..	2020	BergstromScience2020	Modern	0	0	present	..	Druze.DG	..	Israel	32	35	1240K pulldown padded to 3.2M snpset	Shotgun.diploid	..	..	1136805	586995	M	n/a (no relatives detected)	..	..	..	..	..	..	..	..	..	PASS	..
HGDP00604.DG	HGDP00604	..	..	2020	BergstromScience2020	Modern	0	0	present	..	Druze.DG	..	Israel	32	35	1240K pulldown padded to 3.2M snpset	Shotgun.diploid	..	..	1136910	587120	M	n/a (no relatives detected)	..	..	..	..	..	..	..	..	..	PASS	..
HGDP00606.DG	HGDP00606	..	..	2020	BergstromScience2020	Modern	0	0	present	..	Druze.DG	..	Israel	32	35	1240K pulldown padded to 3.2M snpset	Shotgun.diploid	..	..	1138902	588076	F	n/a (no relatives detected)	n/a (female)	n/a (female)	..	..	..	..	..	..	..	PASS	..
S_English-1.DG	HG00126	HG00126		2016	MallickNature2016	Modern	0	0	present	..	English.DG	Kent	United Kingdom	51.19	0.73	1240K pulldown padded to 3.2M snpset	Shotgun.diploid	1	41.37	1118431	583863	M	n/a (no relatives detected)	..	..	..	..	..	..	..	..	S_English-1	PASS	..
S_English-2.DG	HG00128	HG00128		2016	MallickNature2016	Modern	0	0	present	..	English.DG	Kent	United Kingdom	51.19	0.73	1240K pulldown padded to 3.2M snpset	Shotgun.diploid	1	45.54	1116731	583029	F	n/a (no relatives detected)	n/a (female)	n/a (female)	..	..	..	..	..	..	S_English-2	PASS	..
S_Estonian-1.DG	Est375	Est375		2016	MallickNature2016	Modern	0	0	present	..	Estonian.DG	Parnu, Avinurme, Viljandi, Talinn	Estonia	58.3856	24.5022	1240K pulldown padded to 3.2M snpset	Shotgun.diploid	1	38.39	1119394	584316	M	n/a (no relatives detected)	..	..	..	..	..	..	..	..	S_Estonian-1	PASS	..
S_Estonian-2.DG	Est400	Est400		2016	MallickNature2016	Modern	0	0	present	..	Estonian.DG	Parnu, Avinurme, Viljandi, Talinn	Estonia	58.9853	26.8638	1240K pulldown padded to 3.2M snpset	Shotgun.diploid	1	35.24	1118928	584036	M	n/a (no relatives detected)	..	..	..	..	..	..	..	..	S_Estonian-2	PASS	..
S_Finnish-1.DG	HG00174	HG00174		2016	MallickNature2016	Modern	0	0	present	..	Finnish.DG	..	Finland	60.2	24.9	1240K pulldown padded to 3.2M snpset	Shotgun.diploid	1	38.85	1116699	582987	F	n/a (no relatives detected)	n/a (female)	n/a (female)	..	..	..	..	..	..	S_Finnish-1	PASS	..
S_Finnish-2.DG	HG00190	HG00190		2016	MallickNature2016	Modern	0	0	present	..	Finnish.DG	..	Finland	60.2	24.9	1240K pulldown padded to 3.2M snpset	Shotgun.diploid	1	35.22	1119067	584142	M	n/a (no relatives detected)	..	..	..	..	..	..	..	..	S_Finnish-2	PASS	..
S_Finnish-3.DG	S_Finnish-3	S_Finnish-3		2016	MallickNature2016	Modern	0	0	present	..	Finnish_o.DG	..	Finland	60.2	24.9	1240K pulldown padded to 3.2M snpset	Shotgun.diploid	1	45.6	1119038	584143	M	n/a (no relatives detected)	..	..	..	..	..	..	..	..	S_Finnish-3	PASS	..
HGDP00530.DG	HGDP00530	..	..	2020	BergstromScience2020	Modern	0	0	present	..	French_o.DG	..	France	46	2	1240K pulldown padded to 3.2M snpset	Shotgun.diploid	..	..	1141486	589115	M	n/a (no relatives detected)	..	..	..	..	..	..	..	..	..	PASS	..
S_Georgian-1.DG	mg27	mg27		2016	MallickNature2016	Modern	0	0	present	..	Georgian.DG	Zugdidi_in_Megrelia	Georgia	42.5	41.85	1240K pulldown padded to 3.2M snpset	Shotgun.diploid	1	42.73	1120277	584693	M	n/a (no relatives detected)	..	..	..	..	..	..	..	..	S_Georgian-1	PASS	..
S_Georgian-2.DG	mg31	mg31		2016	MallickNature2016	Modern	0	0	present	..	Georgian.DG	Zugdidi_in_Megrelia	Georgia	42.5	41.85	1240K pulldown padded to 3.2M snpset	Shotgun.diploid	1	33.95	1120449	584789	M	n/a (no relatives detected)	..	..	..	..	..	..	..	..	S_Georgian-2	PASS	..
S_Greek-1.DG	NA17377	NA17377		2016	MallickNature2016	Modern	0	0	present	..	Greek_1.DG	..	Greece	37.9667	23.7167	1240K pulldown padded to 3.2M snpset	Shotgun.diploid	1	37.73	1118344	583785	M	n/a (no relatives detected)	..	..	..	..	..	..	..	..	S_Greek-1	PASS	..
S_Greek-2.DG	NA17374	NA17374		2016	MallickNature2016	Modern	0	0	present	..	Greek_2.DG	..	Greece	37.9667	23.7167	1240K pulldown padded to 3.2M snpset	Shotgun.diploid	1	45.48	1118428	583845	M	n/a (no relatives detected)	..	..	..	..	..	..	..	..	S_Greek-2	PASS	..
S_Hungarian-2.DG	NA15202	NA15202		2016	MallickNature2016	Modern	0	0	present	..	Hungarian.DG	..	Hungary	47.5	19.1	1240K pulldown padded to 3.2M snpset	Shotgun.diploid	1	40.73	1117839	583490	M	n/a (no relatives detected)	..	..	..	..	..	..	..	..	S_Hungarian-2	PASS	..
S_Hungarian-1.DG	NA15203	NA15203		2016	MallickNature2016	Modern	0	0	present	..	Hungarian.DG	..	Hungary	47.5	19.1	1240K pulldown padded to 3.2M snpset	Shotgun.diploid	1	40.05	1118682	583965	F	n/a (no relatives detected)	n/a (female)	n/a (female)	..	..	..	..	..	..	S_Hungarian-1	PASS	..
HG01694.SG	HG01694	..	..	..	1KGPhase3	Modern	0	0	present	..	IBS_CanaryIslands.SG	Canary Islands	Spain	..	..	1240K pulldown padded to 3.2M snpset	Shotgun	..	..	1134473	586426	M	n/a (no relatives detected)	..	..	..	..	..	..	..	..	..	PASS	..
HG01695.SG	HG01695	..	..	..	1KGPhase3	Modern	0	0	present	..	IBS_CanaryIslands.SG	Canary Islands	Spain	..	..	1240K pulldown padded to 3.2M snpset	Shotgun	..	..	1132812	585638	F	n/a (no relatives detected)	n/a (female)	n/a (female)	..	..	..	..	..	..	..	PASS	..
S_Icelandic-1.DG	NA15761	NA15761		2016	MallickNature2016	Modern	0	0	present	..	Icelandic.DG	..	Iceland	64.1333	-21.9333	1240K pulldown padded to 3.2M snpset	Shotgun.diploid	1	38.34	1118417	583778	F	n/a (no relatives detected)	n/a (female)	n/a (female)	..	..	..	..	..	..	S_Icelandic-1	PASS	..
S_Icelandic-2.DG	NA15763	NA15763		2016	MallickNature2016	Modern	0	0	present	..	Icelandic.DG	..	Iceland	64.1333	-21.9333	1240K pulldown padded to 3.2M snpset	Shotgun.diploid	1	49.25	1119232	584253	F	n/a (no relatives detected)	n/a (female)	n/a (female)	..	..	..	..	..	..	S_Icelandic-2	PASS	..
S_Iranian-2.DG	iran11	iran11		2016	MallickNature2016	Modern	0	0	present	..	Iranian.DG	migrants_collected_in_Kuwait	Iran	35.5859	51.46	1240K pulldown padded to 3.2M snpset	Shotgun.diploid	1	45.78	1120230	584702	M	n/a (no relatives detected)	..	..	..	..	..	..	..	..	S_Iranian-2	PASS	..
S_Iranian-1.DG	iran17	iran17		2016	MallickNature2016	Modern	0	0	present	..	Iranian.DG	migrants_collected_in_Kuwait	Iran	35.5859	51.46	1240K pulldown padded to 3.2M snpset	Shotgun.diploid	1	38.65	1119186	584213	M	n/a (no relatives detected)	..	..	..	..	..	..	..	..	S_Iranian-1	PASS	..
S_Bergamo-1.DG	HGDP01153	..	..	2016	MallickNature2016	Modern	0	0	present	..	Italian_North.DG	..	Italy	46	10	1240K pulldown padded to 3.2M snpset	Shotgun.diploid	1	68.6	1118868	584083	M	n/a (no relatives detected)	..	..	..	..	..	..	..	..	..	PASS	..
HGDP01151.DG	HGDP01151	..	..	2020	BergstromScience2020	Modern	0	0	present	..	Italian_North.DG	..	Italy	46	10	1240K pulldown padded to 3.2M snpset	Shotgun.diploid	..	..	1139166	588080	M	n/a (no relatives detected)	..	..	..	..	..	..	..	..	..	PASS	..
HGDP01152.DG	HGDP01152	..	..	2020	BergstromScience2020	Modern	0	0	present	..	Italian_North.DG	..	Italy	46	10	1240K pulldown padded to 3.2M snpset	Shotgun.diploid	..	..	1136407	586799	M	n/a (no relatives detected)	..	..	..	..	..	..	..	..	..	PASS	..
HGDP01153.DG	HGDP01153	..	..	2020	BergstromScience2020	Modern	0	0	present	..	Italian_North.DG	..	Italy	46	10	1240K pulldown padded to 3.2M snpset	Shotgun.diploid	..	..	1141461	589079	M	n/a (no relatives detected)	..	..	..	..	..	..	..	..	..	PASS	..
HGDP01155.DG	HGDP01155	..	..	2020	BergstromScience2020	Modern	0	0	present	..	Italian_North.DG	..	Italy	46	10	1240K pulldown padded to 3.2M snpset	Shotgun.diploid	..	..	1139681	588370	M	n/a (no relatives detected)	..	..	..	..	..	..	..	..	..	PASS	..
HGDP01156.DG	HGDP01156	..	..	2020	BergstromScience2020	Modern	0	0	present	..	Italian_North.DG	..	Italy	46	10	1240K pulldown padded to 3.2M snpset	Shotgun.diploid	..	..	1138564	587841	F	n/a (no relatives detected)	n/a (female)	n/a (female)	..	..	..	..	..	..	..	PASS	..
HGDP01157.DG	HGDP01157	..	..	2020	BergstromScience2020	Modern	0	0	present	..	Italian_North.DG	..	Italy	46	10	1240K pulldown padded to 3.2M snpset	Shotgun.diploid	..	..	1139835	588420	U	n/a (no relatives detected)	n/a (sex unknown)	n/a (sex unknown)	..	..	..	..	..	..	..	PASS	..
HGDP01161.DG	HGDP01161	..	..	2020	BergstromScience2020	Modern	0	0	present	..	Italian_North.DG	..	Italy	43	11	1240K pulldown padded to 3.2M snpset	Shotgun.diploid	..	..	1136404	586814	M	n/a (no relatives detected)	..	..	..	..	..	..	..	..	..	PASS	..
HGDP01162.DG	HGDP01162	..	..	2020	BergstromScience2020	Modern	0	0	present	..	Italian_North.DG	..	Italy	43	11	1240K pulldown padded to 3.2M snpset	Shotgun.diploid	..	..	1141270	589035	M	n/a (no relatives detected)	..	..	..	..	..	..	..	..	..	PASS	..
HGDP01163.DG	HGDP01163	HGDP01163	..	2020	BergstromScience2020	Modern	0	0	present	..	Italian_North.DG	..	Italy	43	11	1240K pulldown padded to 3.2M snpset	Shotgun.diploid	..	..	1140804	588818	M	n/a (no relatives detected)	..	..	..	..	..	..	..	..	..	PASS	..
HGDP01164.DG	HGDP01164	..	..	2020	BergstromScience2020	Modern	0	0	present	..	Italian_North.DG	..	Italy	43	11	1240K pulldown padded to 3.2M snpset	Shotgun.diploid	..	..	1136234	586760	M	n/a (no relatives detected)	..	..	..	..	..	..	..	..	..	PASS	..
HGDP01166.DG	HGDP01166	..	..	2020	BergstromScience2020	Modern	0	0	present	..	Italian_North.DG	..	Italy	43	11	1240K pulldown padded to 3.2M snpset	Shotgun.diploid	..	..	1139913	588433	M	n/a (no relatives detected)	..	..	..	..	..	..	..	..	..	PASS	..
HGDP01167.DG	HGDP01167	..	..	2020	BergstromScience2020	Modern	0	0	present	..	Italian_North.DG	..	Italy	43	11	1240K pulldown padded to 3.2M snpset	Shotgun.diploid	..	..	1139937	588470	M	n/a (no relatives detected)	..	..	..	..	..	..	..	..	..	PASS	..
HGDP01168.DG	HGDP01168	HGDP01168	..	2020	BergstromScience2020	Modern	0	0	present	..	Italian_North.DG	..	Italy	43	11	1240K pulldown padded to 3.2M snpset	Shotgun.diploid	..	..	1141127	588960	F	n/a (no relatives detected)	n/a (female)	n/a (female)	..	..	..	..	..	..	..	PASS	..
HGDP01169.DG	HGDP01169	..	..	2020	BergstromScience2020	Modern	0	0	present	..	Italian_North.DG	..	Italy	43	11	1240K pulldown padded to 3.2M snpset	Shotgun.diploid	..	..	1139963	588449	F	n/a (no relatives detected)	n/a (female)	n/a (female)	..	..	..	..	..	..	..	PASS	..
HGDP01171.DG	HGDP01171	..	..	2020	BergstromScience2020	Modern	0	0	present	..	Italian_North.DG	..	Italy	46	10	1240K pulldown padded to 3.2M snpset	Shotgun.diploid	..	..	1139176	588063	F	n/a (no relatives detected)	n/a (female)	n/a (female)	..	..	..	..	..	..	..	PASS	..
HGDP01172.DG	HGDP01172	HGDP01172	..	2020	BergstromScience2020	Modern	0	0	present	..	Italian_North.DG	..	Italy	46	10	1240K pulldown padded to 3.2M snpset	Shotgun.diploid	..	..	1141616	589161	F	n/a (no relatives detected)	n/a (female)	n/a (female)	..	..	..	..	..	..	..	PASS	..
HGDP01173.DG	HGDP01173	..	..	2020	BergstromScience2020	Modern	0	0	present	..	Italian_North.DG	..	Italy	46	10	1240K pulldown padded to 3.2M snpset	Shotgun.diploid	..	..	1137847	587545	M	n/a (no relatives detected)	..	..	..	..	..	..	..	..	..	PASS	..
HGDP01174.DG	HGDP01174	..	..	2020	BergstromScience2020	Modern	0	0	present	..	Italian_North.DG	..	Italy	46	10	1240K pulldown padded to 3.2M snpset	Shotgun.diploid	..	..	1139799	588358	M	n/a (no relatives detected)	..	..	..	..	..	..	..	..	..	PASS	..
HGDP01177.DG	HGDP01177	..	..	2020	BergstromScience2020	Modern	0	0	present	..	Italian_North.DG	..	Italy	46	10	1240K pulldown padded to 3.2M snpset	Shotgun.diploid	..	..	1139911	588399	F	n/a (no relatives detected)	n/a (female)	n/a (female)	..	..	..	..	..	..	..	PASS	..
HGDP00672.DG	HGDP00672	..	..	2020	BergstromScience2020	Modern	0	0	present	..	Italian_Sardinian.DG	..	Italy	..	..	1240K pulldown padded to 3.2M snpset	Shotgun.diploid	..	..	1138978	588053	F	n/a (no relatives detected)	n/a (female)	n/a (female)	..	..	..	..	..	..	..	PASS	labeled TSI.SG but this is not an HGDP sample, sample mixup?
HGDP01062.DG	HGDP01062	..	..	2020	BergstromScience2020	Modern	0	0	present	..	Italian_Sardinian.DG	..	Italy	..	..	1240K pulldown padded to 3.2M snpset	Shotgun.diploid	..	..	1139511	588248	F	n/a (no relatives detected)	n/a (female)	n/a (female)	..	..	..	..	..	..	..	PASS	labeled TSI.SG but this is not an HGDP sample, sample mixup?
S_Iraqi_Jew-1.DG	IraqiJew1771	IraqiJew1771		2016	MallickNature2016	Modern	0	0	present	..	Jew_Iraqi.DG	migrants_collected_in_Israel	Iraq	33.3333	44.4333	1240K pulldown padded to 3.2M snpset	Shotgun.diploid	1	41.9	1119265	584247	F	n/a (no relatives detected)	n/a (female)	n/a (female)	..	..	..	..	..	..	S_Iraqi_Jew-1	PASS	..
S_Iraqi_Jew-2.DG	IraqiJew4291	IraqiJew4291		2016	MallickNature2016	Modern	0	0	present	..	Jew_Iraqi.DG	migrants_collected_in_Israel	Iraq	33.3333	44.4333	1240K pulldown padded to 3.2M snpset	Shotgun.diploid	1	46.39	1119252	584251	M	n/a (no relatives detected)	..	..	..	..	..	..	..	..	S_Iraqi_Jew-2	PASS	..
S_Yemenite_Jew-1.DG	YemeniteJew4695	YemeniteJew4695		2016	MallickNature2016	Modern	0	0	present	..	Jew_Yemenite.DG	migrants_collected_in_Israel	Yemen	15.35	44.2	1240K pulldown padded to 3.2M snpset	Shotgun.diploid	1	51.6	1118245	583924	F	n/a (no relatives detected)	n/a (female)	n/a (female)	..	..	..	..	..	..	S_Yemenite_Jew-1	PASS	..
S_Yemenite_Jew-2.DG	YemeniteJew5433	YemeniteJew5433		2016	MallickNature2016	Modern	0	0	present	..	Jew_Yemenite.DG	migrants_collected_in_Israel	Yemen	15.35	44.2	1240K pulldown padded to 3.2M snpset	Shotgun.diploid	1	55.85	1119677	584452	M	n/a (no relatives detected)	..	..	..	..	..	..	..	..	S_Yemenite_Jew-2	PASS	..
S_Jordanian-3.DG	Jordan214	Jordan214		2016	MallickNature2016	Modern	0	0	present	..	Jordanian.DG	migrants_collected_in_Kuwait	Jordan	32.0546	35.9143	1240K pulldown padded to 3.2M snpset	Shotgun.diploid	1	39.5	1120271	584753	M	n/a (no relatives detected)	..	..	..	..	..	..	..	..	S_Jordanian-3	PASS	..
S_Jordanian-1.DG	Jordan445	Jordan445		2016	MallickNature2016	Modern	0	0	present	..	Jordanian.DG	migrants_collected_in_Kuwait	Jordan	32.0546	35.9143	1240K pulldown padded to 3.2M snpset	Shotgun.diploid	1	46.13	1118297	583822	M	n/a (no relatives detected)	..	..	..	..	..	..	..	..	S_Jordanian-1	PASS	..
S_Jordanian-2.DG	Jordan603	Jordan603		2016	MallickNature2016	Modern	0	0	present	..	Jordanian.DG	migrants_collected_in_Kuwait	Jordan	32.0546	35.9143	1240K pulldown padded to 3.2M snpset	Shotgun.diploid	1	36.71	1120321	584707	M	n/a (no relatives detected)	..	..	..	..	..	..	..	..	S_Jordanian-2	PASS	..
S_Lezgin-1.DG	lez49	lez49		2016	MallickNature2016	Modern	0	0	present	..	Lezgin.DG	Dagestanskiye_Ogni_in_Dagestan	Russia	42.1167	48.1833	1240K pulldown padded to 3.2M snpset	Shotgun.diploid	1	40.31	1119777	584460	M	n/a (no relatives detected)	..	..	..	..	..	..	..	..	S_Lezgin-1	PASS	..
S_Lezgin-2.DG	S_Lezgin-2	S_Lezgin-2		2016	MallickNature2016	Modern	0	0	present	..	Lezgin.DG	Dagestanskiye Ogni, Dagestan	Russia	42.1167	48.1833	1240K pulldown padded to 3.2M snpset	Shotgun.diploid	1	40.22	1120036	584642	M	n/a (no relatives detected)	..	..	..	..	..	..	..	..	S_Lezgin-2	PASS	..
S_Norwegian-1.DG	S_Norwegian-1	S_Norwegian-1		2016	MallickNature2016	Modern	0	0	present	..	Norwegian.DG	..	Norway	..	..	1240K pulldown padded to 3.2M snpset	Shotgun.diploid	1	49.55	1118838	584033	U	n/a (no relatives detected)	n/a (sex unknown)	n/a (sex unknown)	..	..	..	..	..	..	S_Norwegian-1	PASS	..
S_Orcadian-2.DG	HGDP00796	HGDP00796		2007	MallickNature2016 (shotgun data with SNP array data first published in LiScience2008 and JakobssonNature2008)	Modern	0	0	present	..	Orcadian.DG	Orkney Islands	United Kingdom	59	-3	1240K pulldown padded to 3.2M snpset	Shotgun.diploid	1	39.79	1119009	584069	F	n/a (no relatives detected)	n/a (female)	n/a (female)	..	..	..	..	..	..	S_Orcadian-2	PASS	..
S_Orcadian-1.DG	HGDP00798	HGDP00798		2007	MallickNature2016 (shotgun data with SNP array data first published in LiScience2008 and JakobssonNature2008)	Modern	0	0	present	..	Orcadian.DG	Orkney Islands	United Kingdom	59	-3	1240K pulldown padded to 3.2M snpset	Shotgun.diploid	1	40.22	1119218	584201	M	n/a (no relatives detected)	..	..	..	..	..	..	..	..	S_Orcadian-1	PASS	..
HGDP00794.DG	HGDP00794	..	..	2020	BergstromScience2020	Modern	0	0	present	..	Orcadian.DG	Orkney Islands	United Kingdom	59	-3	1240K pulldown padded to 3.2M snpset	Shotgun.diploid	..	..	1137938	587586	F	n/a (no relatives detected)	n/a (female)	n/a (female)	..	..	..	..	..	..	..	PASS	..
HGDP00795.DG	HGDP00795	..	..	2020	BergstromScience2020	Modern	0	0	present	..	Orcadian.DG	..	United Kingdom	59	-3	1240K pulldown padded to 3.2M snpset	Shotgun.diploid	..	..	1138999	588001	M	n/a (no relatives detected)	..	..	..	..	..	..	..	..	..	PASS	..
HGDP00796.DG	HGDP00796	HGDP00796	..	2020	BergstromScience2020	Modern	0	0	present	..	Orcadian.DG	Orkney Islands	United Kingdom	59	-3	1240K pulldown padded to 3.2M snpset	Shotgun.diploid	..	..	1141272	589029	F	n/a (no relatives detected)	n/a (female)	n/a (female)	..	..	..	..	..	..	..	PASS	..
HGDP00797.DG	HGDP00797	..	..	2020	BergstromScience2020	Modern	0	0	present	..	Orcadian.DG	Orkney Islands	United Kingdom	59	-3	1240K pulldown padded to 3.2M snpset	Shotgun.diploid	..	..	1137968	587544	F	n/a (no relatives detected)	n/a (female)	n/a (female)	..	..	..	..	..	..	..	PASS	..
HGDP00798.DG	HGDP00798	HGDP00798	..	2020	BergstromScience2020	Modern	0	0	present	..	Orcadian.DG	Orkney Islands	United Kingdom	59	-3	1240K pulldown padded to 3.2M snpset	Shotgun.diploid	..	..	1141360	589059	M	n/a (no relatives detected)	..	..	..	..	..	..	..	..	..	PASS	..
HGDP00799.DG	HGDP00799	..	..	2020	BergstromScience2020	Modern	0	0	present	..	Orcadian.DG	Orkney Islands	United Kingdom	59	-3	1240K pulldown padded to 3.2M snpset	Shotgun.diploid	..	..	1139019	587985	F	n/a (no relatives detected)	n/a (female)	n/a (female)	..	..	..	..	..	..	..	PASS	..
HGDP00800.DG	HGDP00800	..	..	2020	BergstromScience2020	Modern	0	0	present	..	Orcadian.DG	Orkney Islands	United Kingdom	59	-3	1240K pulldown padded to 3.2M snpset	Shotgun.diploid	..	..	1139385	588202	F	n/a (no relatives detected)	n/a (female)	n/a (female)	..	..	..	..	..	..	..	PASS	..
HGDP00802.DG	HGDP00802	..	..	2020	BergstromScience2020	Modern	0	0	present	..	Orcadian.DG	Orkney Islands	United Kingdom	59	-3	1240K pulldown padded to 3.2M snpset	Shotgun.diploid	..	..	1139086	588062	F	n/a (no relatives detected)	n/a (female)	n/a (female)	..	..	..	..	..	..	..	PASS	..
HGDP00803.DG	HGDP00803	..	..	2020	BergstromScience2020	Modern	0	0	present	..	Orcadian.DG	Orkney Islands	United Kingdom	59	-3	1240K pulldown padded to 3.2M snpset	Shotgun.diploid	..	..	1137866	587480	M	n/a (no relatives detected)	..	..	..	..	..	..	..	..	..	PASS	..
HGDP00804.DG	HGDP00804	..	..	2020	BergstromScience2020	Modern	0	0	present	..	Orcadian.DG	..	United Kingdom	59	-3	1240K pulldown padded to 3.2M snpset	Shotgun.diploid	..	..	1139780	588360	M	n/a (no relatives detected)	..	..	..	..	..	..	..	..	..	PASS	..
HGDP00805.DG	HGDP00805	..	..	2020	BergstromScience2020	Modern	0	0	present	..	Orcadian.DG	Orkney Islands	United Kingdom	59	-3	1240K pulldown padded to 3.2M snpset	Shotgun.diploid	..	..	1132556	585004	F	n/a (no relatives detected)	n/a (female)	n/a (female)	..	..	..	..	..	..	..	PASS	..
HGDP00806.DG	HGDP00806	..	..	2020	BergstromScience2020	Modern	0	0	present	..	Orcadian.DG	Orkney Islands	United Kingdom	59	-3	1240K pulldown padded to 3.2M snpset	Shotgun.diploid	..	..	1138605	587751	F	n/a (no relatives detected)	n/a (female)	n/a (female)	..	..	..	..	..	..	..	PASS	..
HGDP00807.DG	HGDP00807	..	..	2020	BergstromScience2020	Modern	0	0	present	..	Orcadian.DG	Orkney Islands	United Kingdom	59	-3	1240K pulldown padded to 3.2M snpset	Shotgun.diploid	..	..	1141214	589013	M	n/a (no relatives detected)	..	..	..	..	..	..	..	..	..	PASS	..
HGDP00808.DG	HGDP00808	..	..	2020	BergstromScience2020	Modern	0	0	present	..	Orcadian.DG	Orkney Islands	United Kingdom	59	-3	1240K pulldown padded to 3.2M snpset	Shotgun.diploid	..	..	1139501	588218	M	n/a (no relatives detected)	..	..	..	..	..	..	..	..	..	PASS	..
HGDP00810.DG	HGDP00810	..	..	2020	BergstromScience2020	Modern	0	0	present	..	Orcadian.DG	Orkney Islands	United Kingdom	59	-3	1240K pulldown padded to 3.2M snpset	Shotgun.diploid	..	..	1139888	588443	M	n/a (no relatives detected)	..	..	..	..	..	..	..	..	..	PASS	..
S_Palestinian-1.DG	HGDP00722	HGDP00722		2007	MallickNature2016 (shotgun data with SNP array data first published in LiScience2008 and JakobssonNature2008)	Modern	0	0	present	..	Palestinian.DG	..	Israel	32	35	1240K pulldown padded to 3.2M snpset	Shotgun.diploid	1	45.9	1119647	584436	M	n/a (no relatives detected)	..	..	..	..	..	..	..	..	S_Palestinian-1	PASS	..
S_Palestinian-2.DG	HGDP00725	HGDP00725		2007	MallickNature2016 (shotgun data with SNP array data first published in LiScience2008 and JakobssonNature2008)	Modern	0	0	present	..	Palestinian.DG	..	Israel	32	35	1240K pulldown padded to 3.2M snpset	Shotgun.diploid	1	41.82	1119190	584163	F	n/a (no relatives detected)	n/a (female)	n/a (female)	..	..	..	..	..	..	S_Palestinian-2	PASS	..
S_Palestinian-3.DG	HGDP00737	HGDP00737		2007	MallickNature2016 (shotgun data with SNP array data first published in LiScience2008 and JakobssonNature2008)	Modern	0	0	present	..	Palestinian.DG	..	Israel	32	35	1240K pulldown padded to 3.2M snpset	Shotgun.diploid	1	40.27	1118337	583796	F	n/a (no relatives detected)	n/a (female)	n/a (female)	..	..	..	..	..	..	S_Palestinian-3	PASS	..
HGDP00675.DG	HGDP00675	..	..	2020	BergstromScience2020	Modern	0	0	present	..	Palestinian.DG	..	Israel	32	35	1240K pulldown padded to 3.2M snpset	Shotgun.diploid	..	..	1139844	588477	M	n/a (no relatives detected)	..	..	..	..	..	..	..	..	..	PASS	..
HGDP00676.DG	HGDP00676	..	..	2020	BergstromScience2020	Modern	0	0	present	..	Palestinian.DG	..	Israel	32	35	1240K pulldown padded to 3.2M snpset	Shotgun.diploid	..	..	1139838	588458	M	n/a (no relatives detected)	..	..	..	..	..	..	..	..	..	PASS	..
HGDP00677.DG	HGDP00677	..	..	2020	BergstromScience2020	Modern	0	0	present	..	Palestinian.DG	..	Israel	32	35	1240K pulldown padded to 3.2M snpset	Shotgun.diploid	..	..	1135402	586597	M	n/a (no relatives detected)	..	..	..	..	..	..	..	..	..	PASS	..
HGDP00679.DG	HGDP00679	..	..	2020	BergstromScience2020	Modern	0	0	present	..	Palestinian.DG	..	Israel	32	35	1240K pulldown padded to 3.2M snpset	Shotgun.diploid	..	..	1138255	587766	F	n/a (no relatives detected)	n/a (female)	n/a (female)	..	..	..	..	..	..	..	PASS	..
HGDP00680.DG	HGDP00680	..	..	2020	BergstromScience2020	Modern	0	0	present	..	Palestinian.DG	..	Israel	32	35	1240K pulldown padded to 3.2M snpset	Shotgun.diploid	..	..	1134525	586117	F	n/a (no relatives detected)	n/a (female)	n/a (female)	..	..	..	..	..	..	..	PASS	..
HGDP00683.DG	HGDP00683	..	..	2020	BergstromScience2020	Modern	0	0	present	..	Palestinian.DG	..	Israel	32	35	1240K pulldown padded to 3.2M snpset	Shotgun.diploid	..	..	1137693	587423	F	n/a (no relatives detected)	n/a (female)	n/a (female)	..	..	..	..	..	..	..	PASS	..
HGDP00684.DG	HGDP00684	..	..	2020	BergstromScience2020	Modern	0	0	present	..	Palestinian.DG	..	Israel	32	35	1240K pulldown padded to 3.2M snpset	Shotgun.diploid	..	..	1138941	587942	F	n/a (no relatives detected)	n/a (female)	n/a (female)	..	..	..	..	..	..	..	PASS	..
HGDP00685.DG	HGDP00685	..	..	2020	BergstromScience2020	Modern	0	0	present	..	Palestinian_oAfrican.DG	..	Israel	32	35	1240K pulldown padded to 3.2M snpset	Shotgun.diploid	..	..	1138841	587956	F	n/a (no relatives detected)	n/a (female)	n/a (female)	..	..	..	..	..	..	..	PASS	..
HGDP00686.DG	HGDP00686	..	..	2020	BergstromScience2020	Modern	0	0	present	..	Palestinian.DG	..	Israel	32	35	1240K pulldown padded to 3.2M snpset	Shotgun.diploid	..	..	1136177	586690	F	n/a (no relatives detected)	n/a (female)	n/a (female)	..	..	..	..	..	..	..	PASS	..
HGDP00687.DG	HGDP00687	..	..	2020	BergstromScience2020	Modern	0	0	present	..	Palestinian_oAfrican.DG	..	Israel	31	35	1240K pulldown padded to 3.2M snpset	Shotgun.diploid	..	..	1137044	587092	F	n/a (no relatives detected)	n/a (female)	n/a (female)	..	..	..	..	..	..	..	PASS	..
HGDP00688.DG	HGDP00688	..	..	2020	BergstromScience2020	Modern	0	0	present	..	Palestinian.DG	..	Israel	32	35	1240K pulldown padded to 3.2M snpset	Shotgun.diploid	..	..	1139627	588255	F	n/a (no relatives detected)	n/a (female)	n/a (female)	..	..	..	..	..	..	..	PASS	..
HGDP00689.DG	HGDP00689	..	..	2020	BergstromScience2020	Modern	0	0	present	..	Palestinian.DG	..	Israel	32	35	1240K pulldown padded to 3.2M snpset	Shotgun.diploid	..	..	1130786	584502	F	n/a (no relatives detected)	n/a (female)	n/a (female)	..	..	..	..	..	..	..	PASS	..
HGDP00690.DG	HGDP00690	..	..	2020	BergstromScience2020	Modern	0	0	present	..	Palestinian.DG	..	Israel	32	35	1240K pulldown padded to 3.2M snpset	Shotgun.diploid	..	..	1134040	585434	F	n/a (no relatives detected)	n/a (female)	n/a (female)	..	..	..	..	..	..	..	PASS	..
HGDP00691.DG	HGDP00691	..	..	2020	BergstromScience2020	Modern	0	0	present	..	Palestinian.DG	..	Israel	32	35	1240K pulldown padded to 3.2M snpset	Shotgun.diploid	..	..	1138484	587815	F	n/a (no relatives detected)	n/a (female)	n/a (female)	..	..	..	..	..	..	..	PASS	..
HGDP00694.DG	HGDP00694	..	..	2020	BergstromScience2020	Modern	0	0	present	..	Palestinian.DG	..	Israel	32	35	1240K pulldown padded to 3.2M snpset	Shotgun.diploid	..	..	1138801	587894	F	n/a (no relatives detected)	n/a (female)	n/a (female)	..	..	..	..	..	..	..	PASS	..
HGDP00696.DG	HGDP00696	..	..	2020	BergstromScience2020	Modern	0	0	present	..	Palestinian.DG	..	Israel	32	35	1240K pulldown padded to 3.2M snpset	Shotgun.diploid	..	..	1137878	587469	F	n/a (no relatives detected)	n/a (female)	n/a (female)	..	..	..	..	..	..	..	PASS	..
HGDP00697.DG	HGDP00697	..	..	2020	BergstromScience2020	Modern	0	0	present	..	Palestinian.DG	..	Israel	32	35	1240K pulldown padded to 3.2M snpset	Shotgun.diploid	..	..	1138820	587970	F	n/a (no relatives detected)	n/a (female)	n/a (female)	..	..	..	..	..	..	..	PASS	..
HGDP00698.DG	HGDP00698	..	..	2020	BergstromScience2020	Modern	0	0	present	..	Palestinian.DG	..	Israel	32	35	1240K pulldown padded to 3.2M snpset	Shotgun.diploid	..	..	1139036	588032	F	n/a (no relatives detected)	n/a (female)	n/a (female)	..	..	..	..	..	..	..	PASS	..
HGDP00699.DG	HGDP00699	..	..	2020	BergstromScience2020	Modern	0	0	present	..	Palestinian.DG	..	Israel	32	35	1240K pulldown padded to 3.2M snpset	Shotgun.diploid	..	..	1136321	586829	F	n/a (no relatives detected)	n/a (female)	n/a (female)	..	..	..	..	..	..	..	PASS	..
HGDP00700.DG	HGDP00700	..	..	2020	BergstromScience2020	Modern	0	0	present	..	Palestinian.DG	..	Israel	32	35	1240K pulldown padded to 3.2M snpset	Shotgun.diploid	..	..	1139110	588080	F	n/a (no relatives detected)	n/a (female)	n/a (female)	..	..	..	..	..	..	..	PASS	..
HGDP00722.DG	HGDP00722	HGDP00722	..	2020	BergstromScience2020	Modern	0	0	present	..	Palestinian.DG	..	Israel	32	35	1240K pulldown padded to 3.2M snpset	Shotgun.diploid	..	..	1141432	589102	M	n/a (no relatives detected)	..	..	..	..	..	..	..	..	..	PASS	..
HGDP00724.DG	HGDP00724	..	..	2020	BergstromScience2020	Modern	0	0	present	..	Palestinian.DG	..	Israel	32	35	1240K pulldown padded to 3.2M snpset	Shotgun.diploid	..	..	1135443	586507	M	n/a (no relatives detected)	..	..	..	..	..	..	..	..	..	PASS	..
HGDP00725.DG	HGDP00725	HGDP00725	..	2020	BergstromScience2020	Modern	0	0	present	..	Palestinian.DG	..	Israel	32	35	1240K pulldown padded to 3.2M snpset	Shotgun.diploid	..	..	1141326	589071	F	n/a (no relatives detected)	n/a (female)	n/a (female)	..	..	..	..	..	..	..	PASS	..
HGDP00726.DG	HGDP00726	..	..	2020	BergstromScience2020	Modern	0	0	present	..	Palestinian.DG	..	Israel	32	35	1240K pulldown padded to 3.2M snpset	Shotgun.diploid	..	..	1137070	587242	M	n/a (no relatives detected)	..	..	..	..	..	..	..	..	..	PASS	..
HGDP00727.DG	HGDP00727	..	..	2020	BergstromScience2020	Modern	0	0	present	..	Palestinian.DG	..	Israel	32	35	1240K pulldown padded to 3.2M snpset	Shotgun.diploid	..	..	1137280	587301	M	n/a (no relatives detected)	..	..	..	..	..	..	..	..	..	PASS	..
HGDP00729.DG	HGDP00729	..	..	2020	BergstromScience2020	Modern	0	0	present	..	Palestinian.DG	..	Israel	32	35	1240K pulldown padded to 3.2M snpset	Shotgun.diploid	..	..	1140347	588631	M	n/a (no relatives detected)	..	..	..	..	..	..	..	..	..	PASS	..
HGDP00730.DG	HGDP00730	..	..	2020	BergstromScience2020	Modern	0	0	present	..	Palestinian.DG	..	Israel	32	35	1240K pulldown padded to 3.2M snpset	Shotgun.diploid	..	..	1139052	588019	M	n/a (no relatives detected)	..	..	..	..	..	..	..	..	..	PASS	..
HGDP00731.DG	HGDP00731	..	..	2020	BergstromScience2020	Modern	0	0	present	..	Palestinian_oAfrican.DG	..	Israel	32	35	1240K pulldown padded to 3.2M snpset	Shotgun.diploid	..	..	1138338	587721	M	n/a (no relatives detected)	..	..	..	..	..	..	..	..	..	PASS	..
HGDP00732.DG	HGDP00732	..	..	2020	BergstromScience2020	Modern	0	0	present	..	Palestinian.DG	..	Israel	32	35	1240K pulldown padded to 3.2M snpset	Shotgun.diploid	..	..	1138989	587984	M	n/a (no relatives detected)	..	..	..	..	..	..	..	..	..	PASS	..
HGDP00733.DG	HGDP00733	..	..	2020	BergstromScience2020	Modern	0	0	present	..	Palestinian.DG	..	Israel	32	35	1240K pulldown padded to 3.2M snpset	Shotgun.diploid	..	..	1138557	587817	M	n/a (no relatives detected)	..	..	..	..	..	..	..	..	..	PASS	..
HGDP00734.DG	HGDP00734	..	..	2020	BergstromScience2020	Modern	0	0	present	..	Palestinian.DG	..	Israel	32	35	1240K pulldown padded to 3.2M snpset	Shotgun.diploid	..	..	1139905	588414	M	n/a (no relatives detected)	..	..	..	..	..	..	..	..	..	PASS	..
HGDP00735.DG	HGDP00735	..	..	2020	BergstromScience2020	Modern	0	0	present	..	Palestinian.DG	..	Israel	32	35	1240K pulldown padded to 3.2M snpset	Shotgun.diploid	..	..	1135868	586586	F	n/a (no relatives detected)	n/a (female)	n/a (female)	..	..	..	..	..	..	..	PASS	..
HGDP00736.DG	HGDP00736	..	..	2020	BergstromScience2020	Modern	0	0	present	..	Palestinian.DG	..	Israel	32	35	1240K pulldown padded to 3.2M snpset	Shotgun.diploid	..	..	1139250	588198	F	n/a (no relatives detected)	n/a (female)	n/a (female)	..	..	..	..	..	..	..	PASS	..
HGDP00737.DG	HGDP00737	HGDP00737	..	2020	BergstromScience2020	Modern	0	0	present	..	Palestinian.DG	..	Israel	32	35	1240K pulldown padded to 3.2M snpset	Shotgun.diploid	..	..	1141000	588950	F	n/a (no relatives detected)	n/a (female)	n/a (female)	..	..	..	..	..	..	..	PASS	..
HGDP00739.DG	HGDP00739	..	..	2020	BergstromScience2020	Modern	0	0	present	..	Palestinian.DG	..	Israel	32	35	1240K pulldown padded to 3.2M snpset	Shotgun.diploid	..	..	1136986	587047	F	n/a (no relatives detected)	n/a (female)	n/a (female)	..	..	..	..	..	..	..	PASS	..
HGDP00740.DG	HGDP00740	..	..	2020	BergstromScience2020	Modern	0	0	present	..	Palestinian.DG	..	Israel	32	35	1240K pulldown padded to 3.2M snpset	Shotgun.diploid	..	..	1139660	588288	F	n/a (no relatives detected)	n/a (female)	n/a (female)	..	..	..	..	..	..	..	PASS	..
HGDP00745.DG	HGDP00745	..	..	2020	BergstromScience2020	Modern	0	0	present	..	Palestinian.DG	..	Israel	32	35	1240K pulldown padded to 3.2M snpset	Shotgun.diploid	..	..	1138879	587950	F	n/a (no relatives detected)	n/a (female)	n/a (female)	..	..	..	..	..	..	..	PASS	..
HGDP00746.DG	HGDP00746	..	..	2020	BergstromScience2020	Modern	0	0	present	..	Palestinian.DG	..	Israel	32	35	1240K pulldown padded to 3.2M snpset	Shotgun.diploid	..	..	1135429	586348	U	n/a (no relatives detected)	n/a (sex unknown)	n/a (sex unknown)	..	..	..	..	..	..	..	PASS	..
S_Polish-1.DG	S_Polish-1	S_Polish-1		2016	MallickNature2016	Modern	0	0	present	..	Polish.DG	..	Poland	52.2333	21.0167	1240K pulldown padded to 3.2M snpset	Shotgun.diploid	1	47.88	1119210	584233	M	n/a (no relatives detected)	..	..	..	..	..	..	..	..	S_Polish-1	PASS	..
S_North_Ossetian-1.DG	NorthOssetia12	NorthOssetia12		2016	MallickNature2016	Modern	0	0	present	..	Russia_NorthOssetian.DG	Vladikavkaz_in_Republic_of_North_Ossetia_Alania	Russia	43.0167	44.65	1240K pulldown padded to 3.2M snpset	Shotgun.diploid	1	43.13	1120173	584699	M	n/a (no relatives detected)	..	..	..	..	..	..	..	..	S_North_Ossetian-1	PASS	..
S_North_Ossetian-2.DG	NorthOssetia5	NorthOssetia5		2016	MallickNature2016	Modern	0	0	present	..	Russia_NorthOssetian.DG	Vladikavkaz_in_Republic_of_North_Ossetia_Alania	Russia	43.0167	44.65	1240K pulldown padded to 3.2M snpset	Shotgun.diploid	1	46.29	1116343	582557	M	n/a (no relatives detected)	..	..	..	..	..	..	..	..	S_North_Ossetian-2	PASS	..
B_Sardinian-3.DG	HGDP01076	HGDP01076		2013	PrueferNature2013	Modern	0	0	present	..	Sardinian.DG	..	Italy	40	9	1240K pulldown padded to 3.2M snpset	Shotgun.diploid	1	39.48	1119189	584153	M	n/a (no relatives detected)	..	..	..	..	..	..	..	..	B_Sardinian-3	PASS	..
S_Sardinian-2.DG	HGDP01078	HGDP01078		2007	MallickNature2016 (shotgun data with SNP array data first published in LiScience2008 and JakobssonNature2008)	Modern	0	0	present	..	Sardinian.DG	..	Italy	40	9	1240K pulldown padded to 3.2M snpset	Shotgun.diploid	1	34.77	1118627	583955	F	n/a (no relatives detected)	n/a (female)	n/a (female)	..	..	..	..	..	..	S_Sardinian-2	PASS	..
S_Sardinian-1.DG	HGDP01079	HGDP01079		2007	MallickNature2016 (shotgun data with SNP array data first published in LiScience2008 and JakobssonNature2008)	Modern	0	0	present	..	Sardinian.DG	..	Italy	40	9	1240K pulldown padded to 3.2M snpset	Shotgun.diploid	1	36.38	1118803	583956	M	n/a (no relatives detected)	..	..	..	..	..	..	..	..	S_Sardinian-1	PASS	..
HGDP00666.DG	HGDP00666	..	..	2020	BergstromScience2020	Modern	0	0	present	..	Sardinian.DG	..	Italy	40	9	1240K pulldown padded to 3.2M snpset	Shotgun.diploid	..	..	1138275	587656	M	n/a (no relatives detected)	..	..	..	..	..	..	..	..	..	PASS	..
HGDP00667.DG	HGDP00667	..	..	2020	BergstromScience2020	Modern	0	0	present	..	Sardinian.DG	..	Italy	40	9	1240K pulldown padded to 3.2M snpset	Shotgun.diploid	..	..	1138083	587623	F	n/a (no relatives detected)	n/a (female)	n/a (female)	..	..	..	..	..	..	..	PASS	..
HGDP00668.DG	HGDP00668	..	..	2020	BergstromScience2020	Modern	0	0	present	..	Sardinian.DG	..	Italy	40	9	1240K pulldown padded to 3.2M snpset	Shotgun.diploid	..	..	1135440	586353	M	n/a (no relatives detected)	..	..	..	..	..	..	..	..	..	PASS	..
HGDP00669.DG	HGDP00669	..	..	2020	BergstromScience2020	Modern	0	0	present	..	Sardinian.DG	..	Italy	40	9	1240K pulldown padded to 3.2M snpset	Shotgun.diploid	..	..	1138642	587922	F	n/a (no relatives detected)	n/a (female)	n/a (female)	..	..	..	..	..	..	..	PASS	..
HGDP00670.DG	HGDP00670	..	..	2020	BergstromScience2020	Modern	0	0	present	..	Sardinian.DG	..	Italy	40	9	1240K pulldown padded to 3.2M snpset	Shotgun.diploid	..	..	1140810	588842	M	n/a (no relatives detected)	..	..	..	..	..	..	..	..	..	PASS	..
HGDP00671.DG	HGDP00671	..	..	2020	BergstromScience2020	Modern	0	0	present	..	Sardinian.DG	..	Italy	40	9	1240K pulldown padded to 3.2M snpset	Shotgun.diploid	..	..	1140137	588563	M	n/a (no relatives detected)	..	..	..	..	..	..	..	..	..	PASS	..
HGDP00673.DG	HGDP00673	..	..	2020	BergstromScience2020	Modern	0	0	present	..	Sardinian.DG	..	Italy	40	9	1240K pulldown padded to 3.2M snpset	Shotgun.diploid	..	..	1138660	587869	F	n/a (no relatives detected)	n/a (female)	n/a (female)	..	..	..	..	..	..	..	PASS	..
HGDP00674.DG	HGDP00674	..	..	2020	BergstromScience2020	Modern	0	0	present	..	Sardinian.DG	..	Italy	40	9	1240K pulldown padded to 3.2M snpset	Shotgun.diploid	..	..	1139547	588295	M	n/a (no relatives detected)	..	..	..	..	..	..	..	..	..	PASS	..
HGDP01063.DG	HGDP01063	..	..	2020	BergstromScience2020	Modern	0	0	present	..	Sardinian.DG	..	Italy	40	9	1240K pulldown padded to 3.2M snpset	Shotgun.diploid	..	..	1138533	587804	M	n/a (no relatives detected)	..	..	..	..	..	..	..	..	..	PASS	..
HGDP01064.DG	HGDP01064	..	..	2020	BergstromScience2020	Modern	0	0	present	..	Sardinian.DG	..	Italy	40	9	1240K pulldown padded to 3.2M snpset	Shotgun.diploid	..	..	1138661	587868	F	n/a (no relatives detected)	n/a (female)	n/a (female)	..	..	..	..	..	..	..	PASS	..
HGDP01065.DG	HGDP01065	..	..	2020	BergstromScience2020	Modern	0	0	present	..	Sardinian.DG	..	Italy	40	9	1240K pulldown padded to 3.2M snpset	Shotgun.diploid	..	..	1139489	588237	F	n/a (no relatives detected)	n/a (female)	n/a (female)	..	..	..	..	..	..	..	PASS	..
HGDP01066.DG	HGDP01066	..	..	2020	BergstromScience2020	Modern	0	0	present	..	Sardinian.DG	..	Italy	40	9	1240K pulldown padded to 3.2M snpset	Shotgun.diploid	..	..	1139134	588096	M	n/a (no relatives detected)	..	..	..	..	..	..	..	..	..	PASS	..
HGDP01067.DG	HGDP01067	..	..	2020	BergstromScience2020	Modern	0	0	present	..	Sardinian.DG	..	Italy	40	9	1240K pulldown padded to 3.2M snpset	Shotgun.diploid	..	..	1139761	588402	M	n/a (no relatives detected)	..	..	..	..	..	..	..	..	..	PASS	..
HGDP01068.DG	HGDP01068	..	..	2020	BergstromScience2020	Modern	0	0	present	..	Sardinian.DG	..	Italy	40	9	1240K pulldown padded to 3.2M snpset	Shotgun.diploid	..	..	1140100	588531	F	n/a (no relatives detected)	n/a (female)	n/a (female)	..	..	..	..	..	..	..	PASS	..
HGDP01069.DG	HGDP01069	..	..	2020	BergstromScience2020	Modern	0	0	present	..	Sardinian.DG	..	Italy	40	9	1240K pulldown padded to 3.2M snpset	Shotgun.diploid	..	..	1139425	588254	M	n/a (no relatives detected)	..	..	..	..	..	..	..	..	..	PASS	..
HGDP01070.DG	HGDP01070	..	..	2020	BergstromScience2020	Modern	0	0	present	..	Sardinian.DG	..	Italy	40	9	1240K pulldown padded to 3.2M snpset	Shotgun.diploid	..	..	1139944	588461	F	n/a (no relatives detected)	n/a (female)	n/a (female)	..	..	..	..	..	..	..	PASS	..
HGDP01071.DG	HGDP01071	..	..	2020	BergstromScience2020	Modern	0	0	present	..	Sardinian.DG	..	Italy	40	9	1240K pulldown padded to 3.2M snpset	Shotgun.diploid	..	..	1140731	588831	M	n/a (no relatives detected)	..	..	..	..	..	..	..	..	..	PASS	..
HGDP01072.DG	HGDP01072	..	..	2020	BergstromScience2020	Modern	0	0	present	..	Sardinian.DG	..	Italy	40	9	1240K pulldown padded to 3.2M snpset	Shotgun.diploid	..	..	1141030	588958	F	n/a (no relatives detected)	n/a (female)	n/a (female)	..	..	..	..	..	..	..	PASS	..
HGDP01073.DG	HGDP01073	..	..	2020	BergstromScience2020	Modern	0	0	present	..	Sardinian.DG	..	Italy	40	9	1240K pulldown padded to 3.2M snpset	Shotgun.diploid	..	..	1140425	588634	M	n/a (no relatives detected)	..	..	..	..	..	..	..	..	..	PASS	..
HGDP01074.DG	HGDP01074	..	..	2020	BergstromScience2020	Modern	0	0	present	..	Sardinian.DG	..	Italy	40	9	1240K pulldown padded to 3.2M snpset	Shotgun.diploid	..	..	1139447	588280	F	n/a (no relatives detected)	n/a (female)	n/a (female)	..	..	..	..	..	..	..	PASS	..
HGDP01075.DG	HGDP01075	..	..	2020	BergstromScience2020	Modern	0	0	present	..	Sardinian.DG	..	Italy	40	9	1240K pulldown padded to 3.2M snpset	Shotgun.diploid	..	..	1139768	588353	M	n/a (no relatives detected)	..	..	..	..	..	..	..	..	..	PASS	..
HGDP01076.DG	HGDP01076	HGDP01076	..	2020	BergstromScience2020	Modern	0	0	present	..	Sardinian.DG	..	Italy	40	9	1240K pulldown padded to 3.2M snpset	Shotgun.diploid	..	..	1136840	586537	M	n/a (no relatives detected)	..	..	..	..	..	..	..	..	..	PASS	..
HGDP01077.DG	HGDP01077	..	..	2020	BergstromScience2020	Modern	0	0	present	..	Sardinian.DG	..	Italy	40	9	1240K pulldown padded to 3.2M snpset	Shotgun.diploid	..	..	1138478	587810	M	n/a (no relatives detected)	..	..	..	..	..	..	..	..	..	PASS	..
HGDP01078.DG	HGDP01078	HGDP01078	..	2020	BergstromScience2020	Modern	0	0	present	..	Sardinian.DG	..	Italy	40	9	1240K pulldown padded to 3.2M snpset	Shotgun.diploid	..	..	1140964	588912	F	n/a (no relatives detected)	n/a (female)	n/a (female)	..	..	..	..	..	..	..	PASS	..
HGDP01079.DG	HGDP01079	HGDP01079	..	2020	BergstromScience2020	Modern	0	0	present	..	Sardinian.DG	..	Italy	40	9	1240K pulldown padded to 3.2M snpset	Shotgun.diploid	..	..	1141132	588955	M	n/a (no relatives detected)	..	..	..	..	..	..	..	..	..	PASS	..
I8215	I8215	10-SU-28-D1-E-76	tooth	2019	OlaldeScience2019	Direct: IntCal20	2526	104	746-415 calBCE (2445¬±15 BP, PSUAMS-8174)	..	Spain_Greek_oAegean	Girona, Empuries, necropolis Centre de Visitants	Spain	42.1333	3.1083	Repulldown on 3.2M snpset	1240K	2	1.92538	828446	441627	F	n/a (no relatives detected)	n/a (female)	n/a (female)	..	HV11	..	..	..	ds.half,ds.half	S8215.E1.L1,S8215.E1.L2	PASS	..
I8209	I8209	10-SU-28-D1-E-99	tooth	2019	OlaldeScience2019	Direct: IntCal20	2554	99	752-417 calBCE (2455¬±20 BP, PSUAMS-8221)	..	Spain_Greek_oLocal	Girona, Empuries, necropolis Centre de Visitants	Spain	42.1333	3.1083	Repulldown on 3.2M snpset	1240K	2	1.93096	848271	453822	M	n/a (no relatives detected)	..	..	..	U1a1a	..	..	..	ds.half,ds.half	S8209.E1.L1,S8209.E1.L2	PASS	..
I8210	I8210	10-SU-28-D1-E-91	tooth	2019	OlaldeScience2019	Context: Archaeological - Period	2375	43	500-350 BCE	..	Spain_Greek_oLocal	Girona, Empuries, necropolis Centre de Visitants	Spain	42.1333	3.1083	Repulldown on 3.2M snpset	1240K	2	0.055149	62153	33599	M	n/a (no relatives detected)	..	..	..	U5b3	..	..	..	ds.half,ds.half	S8210.E1.L1,S8210.E1.L2	PASS	..
I8211	I8211	10-SU-28-D1-E-96	tooth	2019	OlaldeScience2019	Context: Archaeological - Period	2425	14	500-450 BCE	..	Spain_Greek_oLocal	Girona, Empuries, necropolis Centre de Visitants	Spain	42.1333	3.1083	Repulldown on 3.2M snpset	1240K	2	0.025434	28889	15353	M	n/a (no relatives detected)	..	..	..	HV0+195	..	..	..	ds.half,ds.half	S8211.E1.L1,S8211.E1.L2	PASS	..
I8212	I8212	10-SU-28-D1-E-46	tooth	2019	OlaldeScience2019	Context: Archaeological - Period	2375	43	500-350 BCE	..	Spain_Greek_oLocal	Girona, Empuries, necropolis Centre de Visitants	Spain	42.1333	3.1083	Repulldown on 3.2M snpset	1240K	2	0.030005	34372	18332	M	n/a (no relatives detected)	..	..	..	H27+16093	..	..	..	ds.half,ds.half	S8212.E1.L1,S8212.E1.L2	PASS	..
I8214	I8214	10-SU-28-D1-E-82	tooth	2019	OlaldeScience2019	Context: Archaeological - Period	2375	43	500-350 BCE	..	Spain_Greek_oLocal	Girona, Empuries, necropolis Centre de Visitants	Spain	42.1333	3.1083	Repulldown on 3.2M snpset	1240K	2	0.670118	528349	281162	F	n/a (no relatives detected)	n/a (female)	n/a (female)	..	H3+152	..	..	..	ds.half,ds.half	S8214.E1.L1,S8214.E1.L2	PASS	..
I8340	I8340	10-SU-28-D1-E-63	Tooth	2019	OlaldeScience2019	Context: Archaeological - Period	2375	43	500-350 BCE	..	Spain_Greek_oLocal	Girona, Empuries, necropolis Centre de Visitants	Spain	42.1333	3.1083	Repulldown on 3.2M snpset	1240K	1	0.022077	25628	13763	F	n/a (no relatives detected)	n/a (female)	n/a (female)	93.3	K1a+195	[0.999,1]	0.069	0.013	ds.half	S8340.E1.L1	PASS	..
I8341	I8341	10-SU-28-D1-E-62	Tooth	2019	OlaldeScience2019	Context: Archaeological - Period	2375	43	500-350 BCE	..	Spain_Greek_oLocal	Girona, Empuries, necropolis Centre de Visitants	Spain	42.1333	3.1083	Repulldown on 3.2M snpset	1240K	1	0.041401	47632	26185	M	n/a (no relatives detected)	..	..	110	H1	[0.997,1]	0.096	0.433	ds.half	S8341.E1.L1	PASS	..
I8344	I8344	10-SU-28-D1-E-74	Tooth	2019	OlaldeScience2019	Context: Archaeological - Period	2400	29	500-400 BCE	..	Spain_Greek_oLocal	Girona, Empuries, necropolis Centre de Visitants	Spain	42.1333	3.1083	Repulldown on 3.2M snpset	1240K	1	0.032815	37955	20576	M	n/a (no relatives detected)	..	..	178	H3	[0.97,0.983]	0.079	0.405	ds.half	S8344.E1.L1	PASS	..
I8213	I8213	10-SU-28-D1-E-60	tooth	2019	OlaldeScience2019	Context: Archaeological - Period	2400	29	500-400 BCE	..	Spain_Greek_oLocal_lc	Girona, Empuries, necropolis Centre de Visitants	Spain	42.1333	3.1083	Repulldown on 3.2M snpset	1240K	2	0.01054	11992	6360	F	n/a (no relatives detected)	n/a (female)	n/a (female)	..	K2a	..	..	..	ds.half,ds.half	S8213.E1.L1,S8213.E1.L2	QUESTIONABLE	sexratio
S_Spanish-1.DG	HG01503	HG01503		2016	MallickNature2016	Modern	0	0	present	..	Spanish.DG	Castilla_la_Mancha	Spain	39.9	-4	1240K pulldown padded to 3.2M snpset	Shotgun.diploid	1	35.67	1119081	584172	M	n/a (no relatives detected)	..	..	..	..	..	..	..	..	S_Spanish-1	PASS	..
S_Spanish-2.DG	HG01504	HG01504		2016	MallickNature2016	Modern	0	0	present	..	Spanish.DG	Castilla_la_Mancha	Spain	39.9	-4	1240K pulldown padded to 3.2M snpset	Shotgun.diploid	1	42.97	1116531	582866	F	n/a (no relatives detected)	n/a (female)	n/a (female)	..	..	..	..	..	..	S_Spanish-2	PASS	..
S_Turkish-1.DG	S_Turkish-1	S_Turkish-1		2016	MallickNature2016	Modern	0	0	present	..	Turkish.DG	Kayseri	Turkey	38.7333	35.4833	1240K pulldown padded to 3.2M snpset	Shotgun.diploid	1	44.86	1119929	584591	M	n/a (no relatives detected)	..	..	..	..	..	..	..	..	S_Turkish-1	PASS	..
S_Turkish-2.DG	S_Turkish-2	S_Turkish-2		2016	MallickNature2016	Modern	0	0	present	..	Turkish.DG	Kayseri	Turkey	38.7333	35.4833	1240K pulldown padded to 3.2M snpset	Shotgun.diploid	1	44.31	1119238	584199	F	n/a (no relatives detected)	n/a (female)	n/a (female)	..	..	..	..	..	..	S_Turkish-2	PASS	..
HG01694.DG	HG01694	..	..	..	1KGPhase3	Modern	0	0	present	..	IBS_CanaryIslands.DG	Canary Islands	Spain	..	..	1240K pulldown padded to 3.2M snpset	Shotgun.diploid	..	..	858542	430616	M	n/a (no relatives detected)	..	..	..	..	..	..	..	..	..	PASS_MAYBE_REPLACE_IN_FUTURE_WITH_LESS_FILTERED_VERSION_WITH_MORE_SNPS_COVERED	..
HG01695.DG	HG01695	..	..	..	1KGPhase3	Modern	0	0	present	..	IBS_CanaryIslands.DG	Canary Islands	Spain	..	..	1240K pulldown padded to 3.2M snpset	Shotgun.diploid	..	..	858558	430592	F	n/a (no relatives detected)	n/a (female)	n/a (female)	..	..	..	..	..	..	..	PASS_MAYBE_REPLACE_IN_FUTURE_WITH_LESS_FILTERED_VERSION_WITH_MORE_SNPS_COVERED	..
