# Supplementary material for: A probabilistic approach to visualize the effect of missing data on PCA in ancient human genomics
Source: BMC Genomics. 2025 May 27;26:537. doi: 10.1186/s12864-025-11728-1 (PMC12108005; doi:10.1186/s12864-025-11728-1)
Supplement: Supplementary file 3 — Supplementary Material 3. [file 12864_2025_11728_MOESM3_ESM.xlsx]

## Sheet: Sheet1
Genetic ID	Master ID	Skeletal code	Skeletal element	Year data from this individual was first published [for a present-day individuals we give the data of the data reported here; missing GreenScience 2010 (Vi33.15, Vi33.26), Olalde2018 (I2657), RasmussenNature2010 (Australian)]	Publication	Method for Determining Date; unless otherwise specified, calibrations use 95.4% intervals from OxCal v4.4.2 Bronk Ramsey (2009); r5; Atmospheric data from Reimer et al (2020)	Date mean in BP in years before 1950 CE [OxCal mu for a direct radiocarbon date, and average of range for a contextual date]	Date standard deviation in BP [OxCal sigma for a direct radiocarbon date, and standard deviation of the uniform distribution between the two bounds for a contextual date]	Full Date One of two formats. (Format 1) 95.4% CI calibrated radiocarbon age (Conventional Radiocarbon Age BP, Lab number) e.g. 2624-2350 calBCE (3990¬±40 BP, Ua-35016). (Format 2) Archaeological context range, e.g. 2500-1700 BCE	Age at Death from physical anthropology	Group ID	Locality	Political Entity	Lat.	Long.	Pulldown Strategy	Data source	No. Libraries	1240k coverage (taken from original pulldown where possible)	SNPs hit on autosomal targets (Computed using easystats on 1240k snpset)	SNPs hit on autosomal targets (Computed using easystats on HO snpset)	Molecular Sex	Family ID and position within family	Y haplogroup (manual curation in terminal mutation format)	Y haplogroup (manual curation in ISOGG format)	mtDNA coverage (merged data)	mtDNA haplogroup if >2x or published	mtDNA match to consensus if >2x (merged data)	Damage rate in first nucleotide on sequences overlapping 1240k targets (merged data)	Sex ratio [Y/(Y+X) counts] (merged data)	Library type (minus=no.damage.correction, half=damage.retained.at.last.position, plus=damage.fully.corrected, ds=double.stranded.library.preparation, ss=single.stranded.library.preparation)	Libraries	ASSESSMENT	ASSESSMENT WARNINGS (Xcontam interval is listed if lower bound is >0.005, "QUESTIONABLE" if lower bound is 0.01-0.02, "QUESTIONABLE_CRITICAL" or "FAIL" if lower bound is >0.02) (mtcontam confidence interval is listed if coverage >2 and upper bound is <0.
WC1_noUDG.SG	WC1	n-10	petrous	2016	BroushakiScience2016	Direct: IntCal20	9214	102	7461-7076 calBCE (8240¬±56 BP, UBA-25840)	..	Iran_Wezmeh_N.SG	Wezmeh Cave, Central Zagros	Iran	34.6129	47.1057	Repulldown on 3.2M snpset	Shotgun	..	10.388	1148613	592797	M	n/a (no relatives detected)	..	..	..	J1d6	..	..	..	ds.minus	..	PASS	..
syr013	syr013	syr013	petrous	2022	SrigyanValdioseraCommBio2022	Direct:IntCal13(WARNING:Uncalibrateddatenotreported)	1235	29	665-766 calCE (1302¬±15calBP, wk-46475)	15-21 yrs.	Syria_TellQarassa_Umayyad	TellQarassa	Syria	36.8309	41.4611	NativePulldownon3.2Msnpset	Shotgun	2	..	1129441	583362	F	..	..	..	522.349	R0a2	..	..	..	ds	..	PASS	..
I11699	I11699	330 (26238)	petrous	2021	PattersonNature2021	Context: Archaeological - Period	2300	87	500-200 BCE	..	Austria_IA_LaTene	Lower Austria, St. P√∂lten, Pottenbrunn	Austria	48.2411	15.7017	Repulldown on 3.2M snpset	1240K	1	5.19249	850709	470160	F	n/a (no relatives detected)	n/a (female)	n/a (female)	622.1	H11a2	[0.984,0.998]	0.085	0.009	ds.half	S11699.Y1.E2.L1	PASS	..
ZKU002_noUDG.SG	ZKU002	ZKU002	Petrous	2021	PrueferNatureEcologyEvolution2021	Direct: IntCal20	34054	881	33749-30151 (29650¬±750 BP, OxA-38022)	..	Czechia_Bohemia_UP_HG	Bohemia, KoneÃåprusy Caves, ZlatyÃÅ kuÃänÃå	Czechia	49.916	14.066	Native pulldown on 3.2M snpset	Shotgun	2	..	1111062	576734	F	n/a (no relatives detected)	n/a (female)	n/a (female)	150	N	[0.95,0.97]	0.335	0.055	ss.minus, ds.half	..	PASS	..
KK1_noUDG.SG	KK1	Kotias	tooth	2015	JonesNatureCommunications2015	Direct: IntCal20; R_combine	9678	85	7940-7599 calBCE (8723¬±35 BP) [R_combine: (8665¬±65 BP, RTT-5246); (8745¬±40 BP, OxA-28256)]	..	Georgia_Kotias.SG	Kotias Klde	Georgia	42.28	43.28	Repulldown on 3.2M snpset	Shotgun	..	12.482	1145926	591804	M	n/a (no relatives detected)	..	..	..	H13c	..	..	..	ds.minus	..	PASS	..
I1583_enhanced	I1583	L14-200	petrous	2015	LazaridisAlpaslanRoodenbergScience2022 (higher coverage of previously reported individual from MathiesonNature2015)	Direct: IntCal20	8273	58	6424-6233 calBCE (7460¬±50 BP, Poz-82231)	2024-10-06	Turkey_N	Barcƒ±n (Northwest Anatolia, Marmara)	Turkey	40.3037	29.6085	Repulldown on 3.2M snpset	1240K	1	13.544	1005530	542724	M	n/a (no relatives detected)	..	..	592	K1a2	[0.989,0.996]	0.13	0.41	ds.half	S1583.E1.L1	PASS	Xcontam=[0.006,0.012]
2H10.SG	2H10	2H10_Ages_2_6342	tooth	2021	SeguinOrlandoCurrBio2021	Direct: IntCal20	5165	74	3341-3098 calBCE (4495¬±20 BP, UCAIMS-224907)	..	France_MontAime_MLN.SG	Marne, Mont-Aim√© hypog√©e II	France	48.8585	3.99589	Repulldown on 3.2M snpset	Shotgun	13	ÔøΩ8.643245	1148616	592443	M	Marne, Mont-AimÔøΩ hypogÔøΩe II Family A (3 members) (father-son: 2H10.SG-2H17.SG | 2d: 2H10.SG-2HC51961131.SG, 2H17.SG-2HC51961131.SG)	..	..	3278.12	H3	[0.892,0.945]	..	..	ds.half,ds.half,ds.half,ds.half,ds.half,ds.half,ds.half,ds.half,ds.half,ds.half,ds.half,ds.half,ds.half	2H10_Ages_2_6342_U_i11_lr11,2H10_Ages_2_6342_U_i37_lr11,2H10_Ages_2_6342_U_i38_lr31,2H10_Ages_2_6342_U_i41_lr41,2H10_Ages_2_6342_U_i44_lr11,2H10_Ages_2_6342_U_i46_lr31,2H10_Ages_2_6342_U_i47_lr41,2H10_Ages_2_6342_U_i4_lr11,2H10_Ages_2_6342_U_i56_lr28,2H10_Ages_2_6342_U_i59_lr31,2H10_Ages_2_6342_U_i5_lr31,2H10_Ages_2_6342_U_i6_lr41,2H10_Ages_2_6342_U_i70_lr41	PASS	..
KK1-251.SG	KK1-251	KKper251(552;251)	petrous	2022	MarotiTorokCurrBio2022	Context:Archaeological-period	1243	19	675-740 CE	middle adult	Hungary_LateAvar	CsongraÃÅd-CsanaÃÅd County, Kiskundorozsma-Kett≈ëshat√°rI	Hungary	46.38	20.0894	NativePulldownon3.2Msnpset	Shotgun	4	..	1077180	559679	M	Kiskundorozsma-Kett≈ëshat√°rFamilyA(3Members)(2d:KK-251-KK-252,KK-251-KK-541;3d:KK-252-KK-541)	..	..	289.925	H3ag	..	0.135	0.196	ds.half,ds.half,ds.half,ds.half	KKper251_S5_L001:KKper251_S5_L002:KKper251_S5_L003:KKper251_S5_L004	PASS	..
I0562	I0562	Be9	bone (cranial)	2017	UnterlanderNatureCommunications2017	Context: Archaeological - Period	2300	29	400-300 BCE	..	Kazakhstan_Berel_Pazyryk	Berel	Kazakhstan	49.3356	86.3504	Repulldown on 3.2M snpset	1240K	2	4.786	987692	550904	F	n/a (no relatives detected)	n/a (female)	n/a (female)	989.394	A16	[0.989,0.999]	..	..	ds.half,ds.half	S0562.E2.L2,S0562.E2.L1	PASS	..
R473.SG	R473	Civitavecchia, La Mattonara, T. 3	petrous	2019	AntonioGaoMootsScience2019	Context: Archaeological - Period	2600	29	700-600 BCE	..	Italy_IA_Republic.SG	Civitavecchia	Italy	42.0889	11.7656	Repulldown on 3.2M snpset	Shotgun	..	2.4987	1046133	542418	F	n/a (no relatives detected)	n/a (female)	n/a (female)	..	U5a1	..	..	..	half	..	PASS	..
I0061	I0061	UzOO74	tooth	2015	MathiesonNature2015 (1240k of same same sample with 390k in HaakLazaridis2015)	Context: Union of layer dates of 6367-5991 calBCE (7280¬±80 BP, OxA-1665), 6412-6058 calBCE (7350¬±90 BP, OxA-2266), 6391-6028 calBCE (7330¬±90 BP, OxA-1667), 6591-6236 calBCE (7560¬±90 BP, OxA-1668), 6591-6236 calBCE (7560¬±90 BP, OxA-1669), 6374-5989 calBCE (7280¬±90 BP, OxA-2124), 6570-6092 calBCE (7510¬±90 BP, OxA-2125), 7032-6415 calBCE (7750¬±110 BP, OxA-1973), calibrated by IntCal20	8450	318	7050-5950 BCE	..	Russia_Karelia_HG	Karelia, Yuzhnyy Oleni Ostrov	Russia	61.65	35.65	1240K pulldown padded to 3.2M snpset	1240K	3	5.272	1003545	553665	M	n/a (no relatives detected)	..	..	650.286	C1	[0.987,0.998]	..	..	ds.plus,ds.plus,ds.half	S0230.L1,S0393.L1,S0670.L1	PASS	Xcontam=0.005
Loschbour.DG	I0001	Loschbour	tooth	2014	LazaridisNature2014	Direct: IntCal20	8025	64	6221-5986 calBCE (7205¬±50 BP, OxA-7738)	34-47	Luxembourg_Loschbour.DG	Echternach	Luxembourg	49.81	6.4	1240K pulldown padded to 3.2M snpset	Shotgun.diploid	..	22	1139327	587559	M	n/a (no relatives detected)	..	..	..	U5b1a	..	..	..	half	..	PASS	..
I0103	I0103	ESP16	tooth	2015	MathiesonNature2015 (1240k of same same sample with 390k in HaakLazaridis2015)	Direct: IntCal20	4472	39	2617-2461 calBCE (4000¬±31 BP, MAMS-21488)	..	Germany_CordedWare	Esperstedt	Germany	51.42	11.68	1240K pulldown padded to 3.2M snpset	1240K	3	17.528	1048763	560739	F	n/a (no relatives detected)	n/a (female)	n/a (female)	724.883	W6	[0.945,0.971]	..	..	ds.plus,ds.half,ds.half	S0103.L1,S0660.L1,S0661.L1	PASS	mtcontam=[0.945,0.971]
2H11.SG	2H11	2H11_Ages_2_6343	tooth	2021	SeguinOrlandoCurrBio2021	Direct: IntCal20	5162	75	3351-3102 calBCE (4510¬±20 BP, UCAIMS-224908)	..	France_MontAime_MLN_oHG1.SG	Marne, Mont-Aim√© hypog√©e II	France	48.8585	3.99589	Repulldown on 3.2M snpset	Shotgun	12	15.6084	1149839	593007	M	Marne, Mont-Aim‚àö¬© hypog‚àö¬©e I Family A (2 members) (father-daughter: 2H11.SG-1H06.SG)	..	..	3475.88	J1c1	[0.978,1]	..	..	ds.half,ds.half,ds.half,ds.half,ds.half,ds.half,ds.half,ds.half,ds.half,ds.half,ds.half,ds.half	2H11_Ages_2_6343_U_i12_lr48,2H11_Ages_2_6343_U_i21_lr18,2H11_Ages_2_6343_U_i26_lr38,2H11_Ages_2_6343_U_i27_lr48,2H11_Ages_2_6343_U_i32_lr18,2H11_Ages_2_6343_U_i66_lr38,2H11_Ages_2_6343_U_i72_lr18,2H11_Ages_2_6343_U_i73_lr38,2H11_Ages_2_6343_U_i74_lr48,2H11_Ages_2_6343_U_i77_lr48,2H11_Ages_2_6343_U_i7_lr18,2H11_Ages_2_6343_U_i8_lr38	PASS	..
I13835	I13835	1236; Tumulus 2, grave 7, 6	petrous	2022	LazaridisAlpaslanRoodenbergScience2022	Direct: IntCal20	246	64	1644-1797 calCE (235¬±15 BP, PSUAMS-8291)	adult; 30-40 yrs.	Albania_EarlyModern_oCaucasus	Bar√ß (Southeast, Kor√ßa Basin)	Albania	40.6253	20.8011	Repulldown on 3.2M snpset	1240K	3	10.378	1000133	537405	F	Albania, BarÔøΩ Family A (2 members) (I13837-I13835 have a mother-daughter relationship (order unknown))	n/a (female)	n/a (female)	941.69	U3b1	[0.972,0.99]	0.124	0.00926872	ds.half,ss.half,ss.half	S13835.Y1.E1.L1,S20787.Y1.E1.L1,S20791.Y1.E1.L1	PASS	..
Denisova3.DG	Denisova	Denisova 3	bone (phalanx)	2010	MeyerScience2012 (higher coverage data from an individual originally published in ReichNature2010)	Context: Date argued from as in Douka et al. Nature 2019	63900	7101	74250-49650 BCE	..	Denisova.DG	Denisova Cave, Altai	Russia	51.3975	84.6761	1240K pulldown padded to 3.2M snpset	Shotgun.diploid	..	31	1149356	592997	F	n/a (no relatives detected)	n/a (female)	n/a (female)	..	..	..	..	..	ss.half	..	PASS	..
AltaiNeanderthal.DG	Altai	Denisova 5	bone (phalanx)	2013	PrueferNature2013	Context: Date argued from as in Douka et al. Nature 2019	110450	11287	128050-88950 BCE	..	Altai_Neanderthal.DG	Denisova Cave, Altai	Russia	51.409	84.689	1240K pulldown padded to 3.2M snpset	Shotgun.diploid	..	52	1149663	592992	F	n/a (no relatives detected)	n/a (female)	n/a (female)	..	Neanderthal	..	..	..	ss.half	..	PASS	..
